# Supplementary material for: gem-Bromonitrocyclobutane induced radical cyclization of acrylanilides to construct 2-oxindolesviaphotoredox catalysis
Source: Royal Society of Chemistry journal article supplement (doi:10.1039/d3qo00181d), 2023-01-01
Supplement: d3qo00181d1.pdf [file d3qo00181d1.pdf]

## Supporting Information

***gem*-Bromonitrocyclobutane induced radical cyclization of acrylanilide to  
construct 2-oxindole via photoredox catalysis**

Yawen Guo, Shanshan Ma, Lin Shi, Lidong Liu, Xingyu Lei, Peng Jiao\*

College of Chemistry, Beijing Normal University, Beijing 100875, P. R. China.

Email: [pjiao@bnu.edu.cn](mailto:pjiao@bnu.edu.cn)

## Table of contents

|                                                       |      |
|-------------------------------------------------------|------|
| 1. General information.....                           | S1   |
| 1.1 Photochemical set-up in our lab.....              | S1   |
| 1.2 Optimization of reaction conditions.....          | S2   |
| 2. Preparation of acrylamides.....                    | S4   |
| 2.1 Preparation of acrylamides.....                   | S4   |
| 2.2 Physical data.....                                | S7   |
| 3. Preparation of <i>gem</i> -bromonitroalkanes.....  | S17  |
| 3.1 Preparation of oximes.....                        | S17  |
| 3.2 Preparation of nitro compounds.....               | S17  |
| 3.3 Preparation of <i>gem</i> -bromonitroalkanes..... | S19  |
| 3.4 Physical data.....                                | S20  |
| 4. Photocatalytic radical reactions.....              | S28  |
| 4.1 Typical procedure.....                            | S28  |
| 4.2 Physical data.....                                | S28  |
| 5. Gram-scale reaction.....                           | S42  |
| 6. Conversions of <b>3af</b> .....                    | S42  |
| 6.1 Conversions of <b>3af</b> .....                   | S42  |
| 6.2 Physical data.....                                | S43  |
| 7. Mechanism experiments.....                         | S44  |
| 7.1 Radical-trapping experiment.....                  | S44  |
| 7.2 X-ray diffraction experiment.....                 | S45  |
| 7.3 Stern–Volmer plot.....                            | S45  |
| 7.4 Physical data.....                                | S46  |
| 8. Unsuccessful reactants.....                        | S46  |
| 9. Crystal data.....                                  | S47  |
| 10. NMR spectra.....                                  | S54  |
| 11. References.....                                   | S159 |

# 1. General information

All the solvents and reagents were obtained from commercial sources and used without purification unless stated otherwise. THF, Et<sub>2</sub>O and 1,4-dioxane were distilled over CaH<sub>2</sub> and LiAlH<sub>4</sub> under N<sub>2</sub> atmosphere. Toluene, CH<sub>2</sub>Cl<sub>2</sub> and CH<sub>3</sub>CN were distilled over CaH<sub>2</sub> under N<sub>2</sub>. Acetone, AcOEt, DMSO, DMA, DMF, DME, CHCl<sub>3</sub>, C<sub>2</sub>H<sub>5</sub>NO<sub>2</sub>, CH<sub>3</sub>NO<sub>2</sub> and DBU were dried over activated 4A molecular sieves. All glassware was dried overnight at 100 °C prior to use. All visible light induced photocatalytic reactions were performed in a Schlenk tube under N<sub>2</sub> atmosphere. Thin-layer chromatography (TLC) was performed on silica gel plates (0.2–0.25 mm thickness). Visualization of TLC was achieved by the use of UV light (254 nm). Flash column chromatography was performed on a silica gel (Qingdao Haiyang, 200–300 mesh) column. <sup>1</sup>H and <sup>13</sup>C NMR spectra were recorded on a JEOL ECZ 400 MHz or 600 MHz spectrometer. The chemical shift (δ) values are given in ppm and are referenced to TMS or residual solvent peaks. Chemical shifts of <sup>19</sup>F NMR are referred to CFC<sub>3</sub> (δ = 0). Infrared spectra were obtained on a Nicolet AVATAR 360 FT-IR spectrometer. Melting points were measured on a WRX-4 (Shanghai Yice) micro melting point apparatus. Mass spectra were obtained on an AB Sciex TripleTOF 5600+ mass spectrometer. X-ray diffraction experiment was performed on a Rigaku XtaLAB Synergy diffractometer using Cu Kα radiation. For reactions that require heating, a silicone oil bath was used.

## 1.1 Photochemical set-up in our lab

Synthware® glassware made from borosilicate glass 3.3 and strips of 2835 light-emitting diode (120 LEDs/m, DC 12 V, 10 watt/m) surface-mounted on bare printed circuit board from Shenzhen Jinhongyan Lighting Co., Ltd. were used for photochemical reactions. A LED tube (inner diameter and height of 10 cm) was used as the lighting device for all photochemical reactions. The length of blue LED strip is 1.5 meters and the power is 15 W. The reaction temperature is controlled at about 25 °C by a small desk fan.

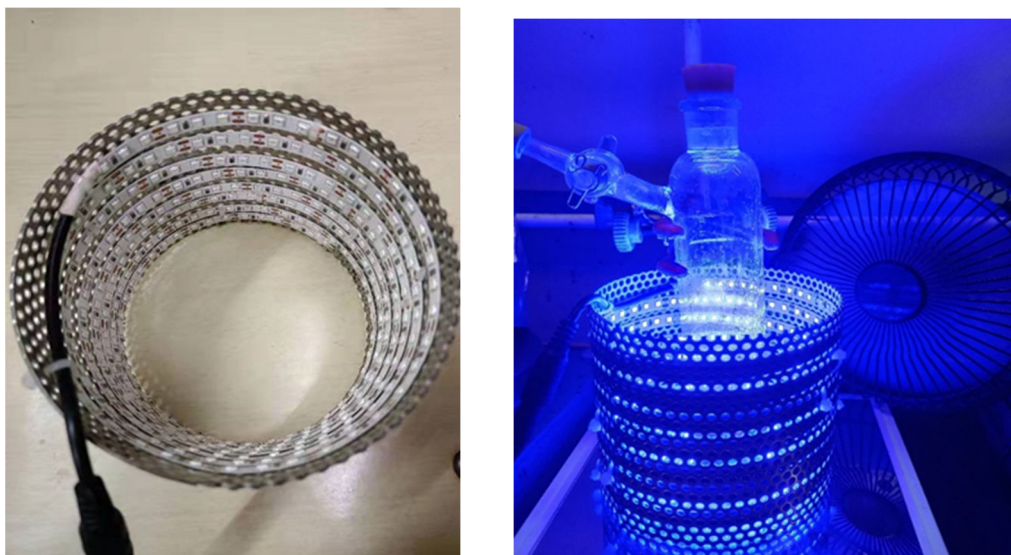

**Figure S1** Photochemical set-up in our lab.

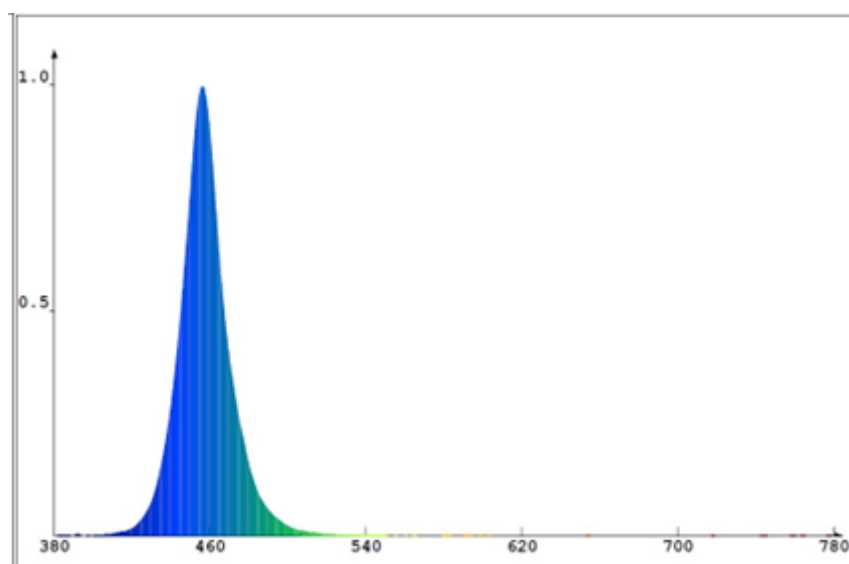

**Figure S2** Luminous spectrum of blue LED ( $\lambda_p = 456$  nm).

## 1.2 Optimization of reaction conditions

**Table S1** Effect of photocatalyst.

| Entry | Photocatalyst                                          | Light source | <b>3aa</b> Yield (%) |
|-------|--------------------------------------------------------|--------------|----------------------|
| 1     | <i>fac</i> -Ir(ppy) <sub>3</sub>                       | blue LEDs    | 61                   |
| 2     | [Ru(bpy) <sub>3</sub> ](PF <sub>6</sub> ) <sub>2</sub> | (15 W)       | 10                   |
| 3     | [Ru(bpy) <sub>3</sub> ]Cl <sub>2</sub>                 |              | trace                |

|    |                                                                    |               |   |
|----|--------------------------------------------------------------------|---------------|---|
| 4  | [Ru(bpy) <sub>3</sub> ] <sub>2</sub> ·6H <sub>2</sub> O            | 5             |   |
| 5  | [Ir(dF(CF <sub>3</sub> )ppy) <sub>2</sub> (dtbbpy)]PF <sub>6</sub> | trace         |   |
| 6  | 4CzIPN (10 mol%)                                                   | 10            |   |
| 7  | PDI (10 mol%)                                                      | 0             |   |
| 8  | none                                                               | 5             |   |
| 9  | PTh (10 mol%)                                                      | purple LEDs   | 0 |
| 10 | <i>fac</i> -Ir(ppy) <sub>3</sub>                                   | ambient light | 0 |

**Table S2** Effect of base.

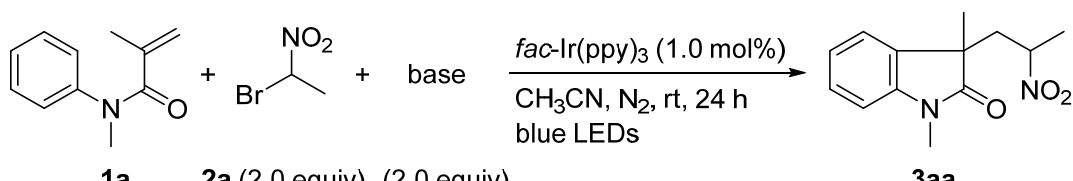

| Entry | Base                                              | Yield (%) | Entry | Base                            | Yield (%) |
|-------|---------------------------------------------------|-----------|-------|---------------------------------|-----------|
| 1     | Na <sub>2</sub> CO <sub>3</sub>                   | 5         | 11    | Ag <sub>2</sub> CO <sub>3</sub> | 83        |
| 2     | Cs <sub>2</sub> CO <sub>3</sub>                   | 4         | 12    | AgF                             | 20        |
| 3     | CsHCO <sub>3</sub>                                | trace     | 13    | AgPF <sub>6</sub>               | trace     |
| 4     | KF·2H <sub>2</sub> O                              |           | 14    | AgNO <sub>2</sub>               |           |
| 5     | K <sub>3</sub> PO <sub>4</sub> ·7H <sub>2</sub> O |           | 15    | AgNO <sub>3</sub>               |           |
| 6     | 2,6-lutidine                                      | 0         | 16    | Ag <sub>2</sub> O               |           |
| 7     | pyridine                                          |           | 17    | AgOAc                           | 0         |
| 8     | Et <sub>3</sub> N                                 |           | 18    | Ag <sub>2</sub> SO <sub>4</sub> |           |
| 9     | DBU                                               |           | 19    | AgOTf                           |           |
| 10    | TBD                                               | 13        | 20    | none                            |           |

**Table S3** Effect of solvent.

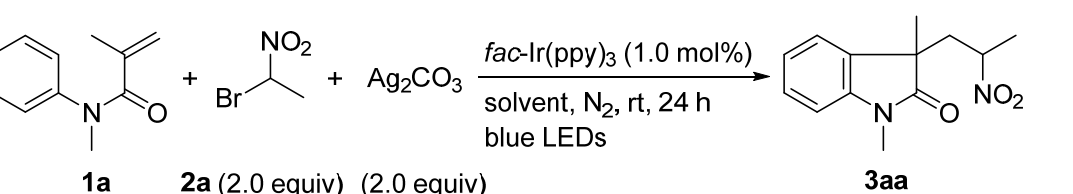

| Entry | Solvent            | Yield (%) | Entry | Solvent            | Yield (%) |
|-------|--------------------|-----------|-------|--------------------|-----------|
| 1     | CH <sub>3</sub> CN | 61        | 7     | 1,2-dichloroethane | 32        |
| 2     | THF                | 41        | 8     | ethyl acetate      | 0         |
| 3     | DME                | 62        | 9     | acetone            | 88        |
| 4     | 1,4-dioxane        | 0         | 10    | DMSO               | trace     |
| 5     | toluene            | 0         | 11    | DMF                | 43        |
| 6     | DCM                | 42        | 12    | CH <sub>3</sub> OH | 0         |

## 2. Preparation of acrylamides

### 2.1 Preparation of acrylamides

#### General procedure A<sup>1</sup>

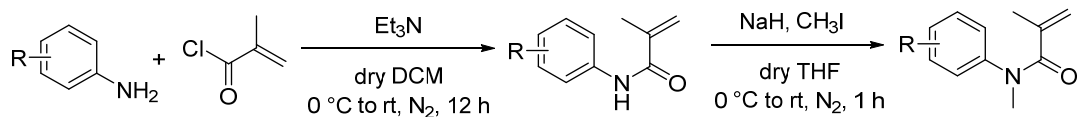

In a 100 mL Schlenk tube, the corresponding aniline (21 mmol) and triethylamine (4.19 g, 42 mmol, 2 equiv) were dissolved in anhydrous DCM (50 mL) under N<sub>2</sub> atmosphere. The mixture was stirred at 0 °C, and methacryloyl chloride (2.4 g, 23 mmol, 1.1 equiv) was added slowly under N<sub>2</sub> atmosphere. The resulting solution was stirred at room temperature for 12 h, quenched with H<sub>2</sub>O (10 mL), extracted with DCM (50 mL × 3). The combined organic layer was washed with saturated brine (50 mL × 3), dried over Na<sub>2</sub>SO<sub>4</sub>, and concentrated. The residue was purified by recrystallization.

In a 100 mL Schlenk tube, the corresponding *N*-phenylmethacrylamide (6.0 mmol) was dissolved in anhydrous THF (50 mL) under N<sub>2</sub> atmosphere. Then NaH (60% in mineral oil, 480 mg, 12 mmol, 2.0 equiv) was added in portions to the solution. The mixture was stirred at 0 °C for 20 min, then CH<sub>3</sub>I (1.70 g, 12 mmol, 2.0 equiv) was added dropwise under N<sub>2</sub> atmosphere. The resulting solution was stirred at room temperature for 1 h, quenched carefully with H<sub>2</sub>O (10 mL), extracted with ethyl acetate (30 mL × 3). The combined organic layer was washed with saturated brine (30 mL × 3), dried over Na<sub>2</sub>SO<sub>4</sub>, and concentrated. The residue was purified by flash chromatography on silica gel to give the corresponding *N*-phenyl methacrylamide.

#### General procedure B<sup>1</sup>

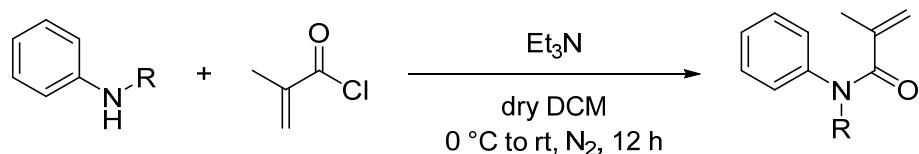

In a 100 mL Schlenk tube, *N*-substituted aniline (21 mmol) and triethylamine (4.19 g, 42 mmol, 2 equiv) were dissolved in anhydrous DCM (50 mL) under N<sub>2</sub> atmosphere. The mixture was stirred at 0 °C, and methacryloyl chloride (2.6 g, 24 mmol, 1.2 equiv) was added slowly under N<sub>2</sub> atmosphere. The resulting solution was stirred at room temperature for 12 h, quenched with H<sub>2</sub>O (10 mL), extracted with DCM (50 mL × 3). The combined organic layer was washed with saturated brine (50 mL × 3), dried over Na<sub>2</sub>SO<sub>4</sub>,

and concentrated. The residue was purified by flash chromatography on silica gel to give the corresponding product.

### General procedure C<sup>2</sup>

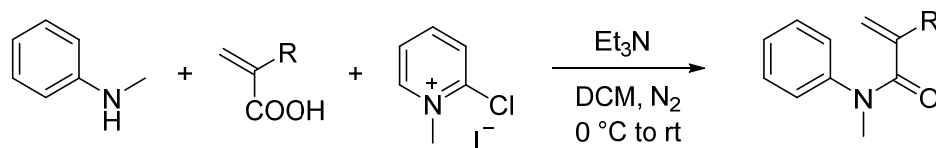

In a 100 mL Schlenk tube, *N*-methylaniline (14 mmol), Mukaiyama reagent (4.3 g, 1.5 equiv) and triethylamine (4.25 g, 42 mmol, 3 equiv) were dissolved in anhydrous DCM (20 mL) under N<sub>2</sub> atmosphere. The mixture was stirred at 0 °C, and the corresponding acrylic acid (1.2 equiv) was added slowly under N<sub>2</sub> atmosphere. The resulting solution was stirred at room temperature for 12 h, quenched with H<sub>2</sub>O (10 mL), extracted with DCM (50 mL × 3). The combined organic layer was washed with saturated brine (50 mL × 3), dried over Na<sub>2</sub>SO<sub>4</sub>, and concentrated. The residue was purified by flash chromatography on silica gel to give the corresponding product.

### General procedure D<sup>3</sup>

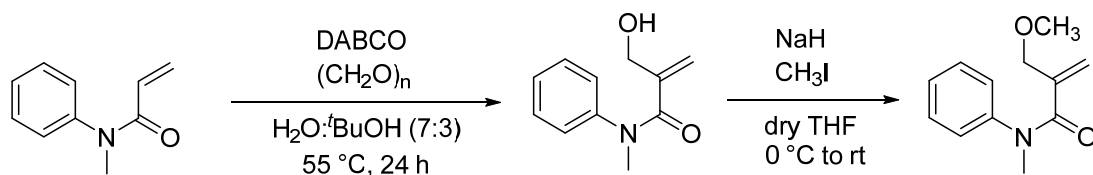

In a 100 mL Schlenk tube, paraformaldehyde (3.0 g, 5.0 equiv), DABCO (2.24 g, 1.0 equiv) and phenol (0.47 g, 0.25 equiv) were dissolved in a mixture of *t*-butanol and water (7 mL, 3:7). The mixture was stirred at 55 °C until dissolution is complete. *N*-Methyl-*N*-phenylacrylamide (3.22 g, 20 mmol) was added and the mixture was stirred at 55 °C for 24 h. Then, the organic solvent was removed under reduced pressure and the residue was extracted with chloroform (20 mL × 3). The organic phase was collected and dried over anhydrous Na<sub>2</sub>SO<sub>4</sub> and the solvent was removed under reduced pressure. The crude material was purified by flash chromatography on silica gel to give 2-(hydroxymethyl)-*N*-methyl-*N*-phenylacrylamide (white solid, 84% yield).

In a 100 mL Schlenk tube, 2-(hydroxymethyl)-*N*-methyl-*N*-phenylacrylamide (0.30 g, 1.57 mmol) was dissolved in anhydrous THF (50 mL) under N<sub>2</sub> atmosphere. Then NaH (60% in mineral oil, 130 mg, 3.14 mmol, 2.0 equiv) was added in portions to the solution. The mixture was stirred at 0 °C for 20 min, then CH<sub>3</sub>I (0.45 g, 3.14 mmol, 2.0 equiv) was added dropwise under N<sub>2</sub> atmosphere. The resulting solution was stirred at room temperature until the reaction was completed, quenched carefully with H<sub>2</sub>O (10 mL),

extracted with ethyl acetate (30 mL × 3). The combined organic layer was washed with saturated brine (30 mL × 3), dried over Na<sub>2</sub>SO<sub>4</sub>, and concentrated. The residue was purified by flash chromatography on silica gel to give the corresponding product as a colorless oil (300 mg, 82% yield).

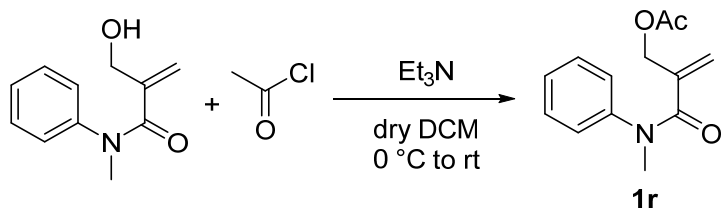

In a 100 mL Schlenk tube, 2-(hydroxymethyl)-*N*-methyl-*N*-phenylacrylamide (2.0 g, 1.0 equiv) and Et<sub>3</sub>N (2.1 g, 2.0 equiv) were dissolved in anhydrous CH<sub>2</sub>Cl<sub>2</sub> (50 mL) under N<sub>2</sub> atmosphere. The mixture was stirred at 0 °C, then acetyl chloride (1.6 g, 2.0 equiv) was added dropwise under N<sub>2</sub> atmosphere. The resulting solution was stirred at room temperature until the reaction was completed, quenched carefully with H<sub>2</sub>O (10 mL), extracted with ethyl acetate (30 mL × 3). The combined organic layer was washed with saturated brine (30 mL × 3), dried over Na<sub>2</sub>SO<sub>4</sub>, and concentrated. The residue was purified by flash chromatography on silica gel to give **1r** as a pale yellow oil (2.44 g, 86% yield).

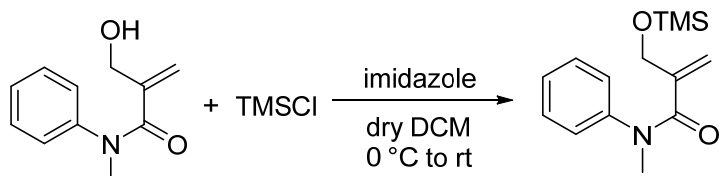

In a 100 mL Schlenk tube, 2-(hydroxymethyl)-*N*-methyl-*N*-phenylacrylamide (2.0 g, 1.0 equiv) and imidazole (2.14 g, 3.0 equiv) were dissolved in anhydrous CH<sub>2</sub>Cl<sub>2</sub> (50 mL) under N<sub>2</sub> atmosphere. The mixture was stirred at 0 °C, then TMSCl (2.3 g, 2.0 equiv) was added dropwise under N<sub>2</sub> atmosphere. The resulting solution was stirred at room temperature until the reaction was completed, quenched with H<sub>2</sub>O (10 mL), extracted with ethyl acetate (30 mL × 3). The combined organic layer was washed with saturated brine (30 mL × 3), dried over Na<sub>2</sub>SO<sub>4</sub>, and concentrated. The residue was purified by flash chromatography on silica gel to give the corresponding product as a yellow oil (2.5 g, 91% yield).

#### *tert*-Butyl methacryloyl(phenyl)carbamate<sup>4</sup>

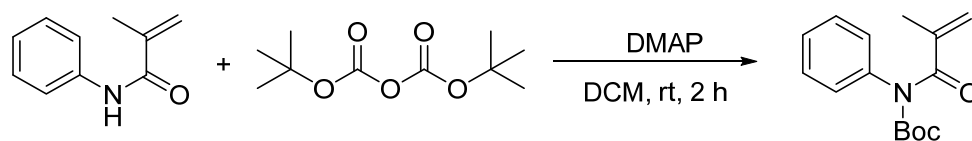

To a stirred solution of *N*-phenyl methacrylamide (2.25 g, 14 mmol) in 50 mL DCM were added DMAP (30 mg, 0.25 mmol) and Boc<sub>2</sub>O (3.91 g, 21 mmol) successively. The resulting solution was stirred at



room temperature for 2 h, after which the solvent was removed in vacuo. The residue was purified by flash chromatography on silica gel to give a white solid (3.3 g, 90% yield).

#### *N*-Benzyl-*N*-phenyl methacrylamide<sup>1</sup>

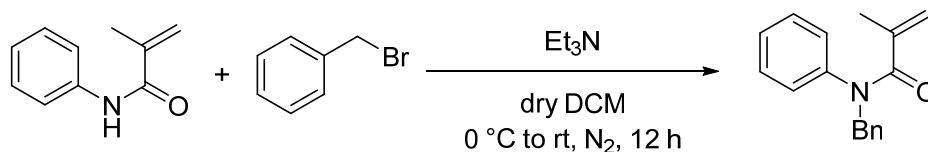

In a 100 mL Schlenk tube, *N*-phenyl methacrylamide (1.5 g, 14 mmol) and triethylamine (2.8 g, 28 mmol, 2.0 equiv) were dissolved in anhydrous DCM (50 mL) under  $\text{N}_2$  atmosphere. The mixture was stirred at  $0\text{ }^\circ\text{C}$ , and benzyl bromide (4.18 g, 21 mmol, 1.5 equiv) was added slowly under  $\text{N}_2$  atmosphere. The resulting solution was stirred at room temperature for 12 h, after which the solvent was removed in vacuo. The residue was purified by flash chromatography on silica gel to give a light yellow oil (3.5 g, 86% yield).

## 2.2 Physical data

#### *N*-Methyl-*N*-phenylmethacrylamide (**1a**)<sup>1</sup>

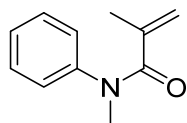

#### General procedure A

White solid (2.1 g, 97% yield);  $^1\text{H}$  NMR (400 MHz, Chloroform-*d*)  $\delta$  7.39 – 7.30 (m, 2H), 7.30 – 7.21 (m, 1H), 7.17 – 7.10 (m, 2H), 5.03 (t,  $J = 1.5$  Hz, 1H), 4.99 (t,  $J = 1.1$  Hz, 1H), 3.35 (s, 3H), 1.76 (dd,  $J = 1.6, 1.0$  Hz, 3H) ppm;  $^{13}\text{C}$  NMR (150 MHz, Chloroform-*d*)  $\delta$  171.9, 144.6, 140.7, 129.2, 126.8, 126.5, 119.3, 37.6, 20.2 ppm.

#### *N*-Methyl-*N*-(*p*-tolyl) methacrylamide (**1b**)<sup>1</sup>

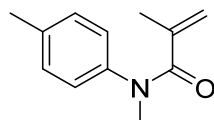

#### General procedure A

Yellow oil (2.0 g, 95% yield);  $^1\text{H}$  NMR (400 MHz, Chloroform-*d*)  $\delta$  7.09 (t,  $J = 6.7$  Hz, 2H), 6.98 (d,  $J = 8.3$  Hz, 2H), 4.96 (d,  $J = 11.5$  Hz, 2H), 3.28 (d,  $J = 1.4$  Hz, 3H), 2.30 (s, 3H), 1.72 (s, 3H) ppm;  $^{13}\text{C}$  NMR (100 MHz, Chloroform-*d*)  $\delta$  171.9, 141.9, 140.7, 136.6, 129.7, 126.2, 118.9, 37.5, 20.8 ppm.

#### *N*-(4-Methoxyphenyl)-*N*-methylmethacrylamide (**1c**)<sup>1</sup>

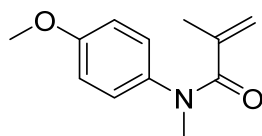

#### General procedure A

Yellow oil (1.6 g, 86% yield);  $^1\text{H}$  NMR (600 MHz, Chloroform-*d*)  $\delta$  7.02 – 6.95 (m, 2H), 6.83 – 6.77 (m, 2H), 4.94 (d,  $J = 17.7$  Hz, 2H), 3.74 (s, 3H), 3.24 (s, 3H), 1.68 (s, 3H) ppm;  $^{13}\text{C}$  NMR (150 MHz, Chloroform-*d*)  $\delta$  171.8, 158.0, 140.6, 127.4, 118.6, 114.1, 55.1, 37.5, 20.1 ppm.

#### *N*-Methyl-*N*-(4-(trifluoromethyl) phenyl)methacrylamide (1d) <sup>1</sup>

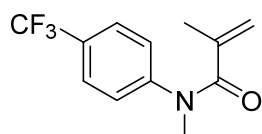

#### General procedure A

Yellow oil (2.0 g, 95% yield);  $^1\text{H}$  NMR (400 MHz, Chloroform-*d*)  $\delta$  6.67 – 6.59 (m, 2H), 6.28 (dt,  $J = 7.7, 1.0$  Hz, 2H), 4.35 – 3.87 (m, 2H), 2.39 (s, 3H), 0.83 (d,  $J = 0.6$  Hz, 3H) ppm;  $^{13}\text{C}$  NMR (100 MHz, Chloroform-*d*)  $\delta$  171.7, 147.8, 140.1, 128.8 (q,  $J = 0.32$  Hz), 126.4, 120.1, 37.4, 20.1 ppm.

#### *N*-(4-Cyanophenyl)-*N*-methylmethacrylamide (1e) <sup>1</sup>

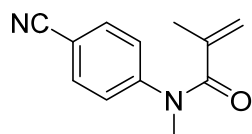

#### General procedure A

White solid (1.9 g, 94% yield);  $^1\text{H}$  NMR (600 MHz, Chloroform-*d*)  $\delta$  6.62 – 6.26 (m, 2H), 6.01 (d,  $J = 8.7$  Hz, 2H), 4.23 – 3.58 (m, 2H), 2.13 (s, 3H), 0.59 (dd,  $J = 1.7, 1.0$  Hz, 3H) ppm;  $^{13}\text{C}$  NMR (150 MHz, Chloroform-*d*)  $\delta$  171.6, 148.6, 140.0, 133.1, 126.4, 120.4, 118.1, 110.1, 37.3, 20.0 ppm.

#### Methyl 4-(*N*-methylmethacrylamido) benzoate (1f) <sup>1</sup>

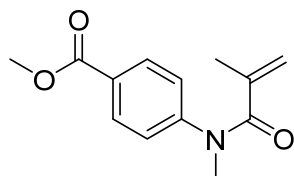

#### General procedure A

White solid (1.5 g, 80% yield);  $^1\text{H}$  NMR (400 MHz, Chloroform-*d*)  $\delta$  8.29 – 7.93 (m, 2H), 7.39 – 7.07 (m, 2H), 5.02 (ddd,  $J = 36.3, 1.8, 0.9$  Hz, 2H), 3.91 (d,  $J = 0.6$  Hz, 3H), 3.37 (d,  $J = 0.6$  Hz, 3H), 1.79 (t,

$J = 0.9$  Hz, 3H) ppm;  $^{13}\text{C}$  NMR (100 MHz, Chloroform- $d$ )  $\delta$  171.8, 166.2, 148.7, 140.3, 130.6, 128.2, 125.9, 120.1, 52.2, 37.4, 20.1 ppm.

***N*-(4-Fluorophenyl)-*N*-methylmethacrylamide (1g)**<sup>1</sup>

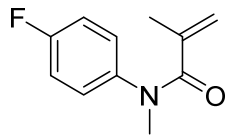

**General procedure A**

White solid (1.9 g, 90% yield);  $^1\text{H}$  NMR (400 MHz, Chloroform- $d$ )  $\delta$  7.26 – 6.80 (m, 4H), 4.99 (dt,  $J = 30.4, 1.4$  Hz, 2H), 3.30 (s, 3H), 1.74 (s, 3H) ppm;  $^{13}\text{C}$  NMR (100 MHz, Chloroform- $d$ )  $\delta$  171.9, 161.1 (d,  $J = 247.0$  Hz), 140.5, 128.1 (d,  $J = 8.6$  Hz), 119.3, 116.0 (d,  $J = 22.7$  Hz), 37.7, 20.2 ppm.

***N*-(4-Chlorophenyl)-*N*-methylmethacrylamide (1h)**<sup>1</sup>

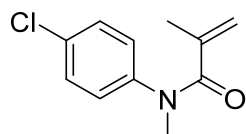

**General procedure A**

White solid (1.8 g, 92% yield);  $^1\text{H}$  NMR (600 MHz, Chloroform- $d$ )  $\delta$  7.31 – 7.28 (m, 2H), 7.08 – 7.04 (m, 2H), 5.05 (p,  $J = 1.6$  Hz, 1H), 4.96 (p,  $J = 1.1$  Hz, 1H), 3.30 (s, 3H), 1.76 (s, 3H) ppm;  $^{13}\text{C}$  NMR (150 MHz, Chloroform- $d$ )  $\delta$  171.8, 143.1, 140.3, 132.5, 129.3, 127.7, 119.6, 37.6, 20.2 ppm.

***N*-(4-Bromophenyl)-*N*-methylmethacrylamide (1i)**<sup>1</sup>

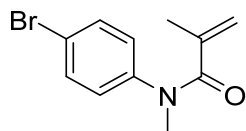

**General procedure A**

White solid (2.1 g, 96% yield);  $^1\text{H}$  NMR (400 MHz, Chloroform- $d$ )  $\delta$  7.43 (d,  $J = 8.7$  Hz, 2H), 6.99 (d,  $J = 8.7$  Hz, 2H), 4.99 (dt,  $J = 36.5, 1.2$  Hz, 2H), 3.29 (s, 3H), 1.75 (s, 3H) ppm;  $^{13}\text{C}$  NMR (100 MHz, Chloroform- $d$ )  $\delta$  171.6, 143.6, 140.3, 132.3, 127.9, 120.3, 119.6, 37.5, 20.1 ppm.

***N*-Methyl-*N*-(*m*-tolyl) methacrylamide (1j)**<sup>1</sup>

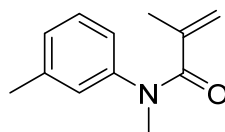

**General procedure A**

Yellow oil (1.9 g, 93% yield);  $^1\text{H}$  NMR (400 MHz, Chloroform-*d*)  $\delta$  7.14 (t,  $J = 7.7$  Hz, 1H), 7.02 – 6.93 (m, 1H), 6.91 – 6.82 (m, 2H), 4.93 (dt,  $J = 9.5, 1.3$  Hz, 2H), 3.25 (s, 3H), 2.42 – 2.17 (m, 3H), 1.82 – 1.64 (m, 3H) ppm;  $^{13}\text{C}$  NMR (100 MHz, Chloroform-*d*)  $\delta$  171.8, 144.4, 140.6, 139.0, 128.8, 127.5, 126.9, 123.4, 119.0, 37.5, 21.1, 20.2 ppm.

***N*-(3-Methoxyphenyl)-*N*-methylmethacrylamide (1k)**<sup>1</sup>

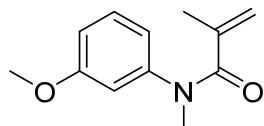

**General procedure A**

Yellow oil (1.8 g, 91% yield);  $^1\text{H}$  NMR (400 MHz, Chloroform-*d*)  $\delta$  7.14 (ddd,  $J = 8.1, 6.7, 2.2$  Hz, 1H), 6.73 – 6.55 (m, 3H), 5.13 – 4.78 (m, 2H), 3.68 (d,  $J = 2.5$  Hz, 3H), 3.22 (d,  $J = 2.4$  Hz, 3H), 1.78 – 1.55 (m, 3H) ppm;  $^{13}\text{C}$  NMR (150 MHz, Chloroform-*d*)  $\delta$  171.8, 160.1, 145.7, 140.7, 129.8, 119.1, 118.7, 112.5, 112.1, 55.3, 37.5, 20.2 ppm.

***N*-(3-Chlorophenyl)-*N*-methylmethacrylamide (1l)**<sup>1</sup>

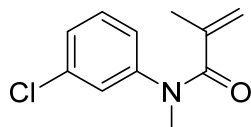

**General procedure A**

Yellow oil (1.5 g, 85% yield);  $^1\text{H}$  NMR (400 MHz, Chloroform-*d*)  $\delta$  7.38 – 6.93 (m, 4H), 5.64 – 4.86 (m, 2H), 3.34 (s, 3H), 1.80 (d,  $J = 1.5$  Hz, 3H) ppm;  $^{13}\text{C}$  NMR (100 MHz, Chloroform-*d*)  $\delta$  171.7, 145.8, 140.2, 134.6, 130.1, 127.0, 126.6, 124.6, 119.8, 37.6, 20.2 ppm.

***N*-Methyl-*N*-(*m*-tolyl) methacrylamide (1m)**<sup>1</sup>

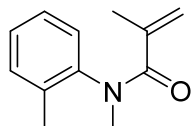

**General procedure A**

Yellow oil (2.1 g, 95% yield);  $^1\text{H}$  NMR (400 MHz, Chloroform-*d*)  $\delta$  7.63 – 6.80 (m, 4H), 4.95 (s, 2H), 3.22 (s, 3H), 2.26 (s, 3H), 1.74 (s, 3H) ppm;  $^{13}\text{C}$  NMR (100 MHz, Chloroform-*d*)  $\delta$  171.8, 143.0, 140.4, 134.7, 131.1, 128.0, 127.7, 126.7, 118.3, 36.5, 20.1, 17.5 ppm.

***N*-(2-Chlorophenyl)-*N*-methylmethacrylamide (1n)**<sup>1</sup>

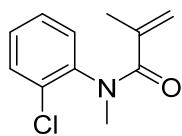

#### General procedure A

Yellow oil (2.0 g, 93% yield);  $^1\text{H}$  NMR (400 MHz, Chloroform-*d*)  $\delta$  7.38 – 7.31 (m, 1H), 7.24 – 7.06 (m, 3H), 4.87 (d,  $J$  = 8.0 Hz, 2H), 3.15 (s, 3H), 1.71 (s, 3H) ppm.

#### 1-(3,4-Dihydroquinolin-1(2H)-yl)-2-methylprop-2-en-1-one (1o) <sup>1</sup>

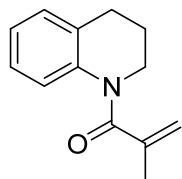

#### General procedure B

Colorless oil (1.8 g, 89% yield);  $^1\text{H}$  NMR (400 MHz, Chloroform-*d*)  $\delta$  7.24 – 7.17 (m, 1H), 7.15 – 6.99 (m, 3H), 5.42 – 4.97 (m, 2H), 3.79 (t,  $J$  = 6.5 Hz, 2H), 2.76 (t,  $J$  = 6.7 Hz, 2H), 1.97 (p,  $J$  = 6.6 Hz, 2H), 1.87 (s, 2H) ppm;  $^{13}\text{C}$  NMR (100 MHz, Chloroform-*d*)  $\delta$  171.3, 141.0, 138.7, 131.1, 128.1, 125.6, 124.6, 123.9, 118.8, 43.7, 26.5, 23.7, 19.6 ppm.

#### 3-Methyl-1,1-diphenylbut-3-en-2-one (1p) <sup>1</sup>

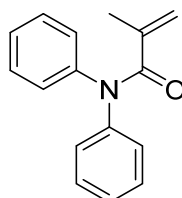

#### General procedure B

White solid (2.2 g, 95% yield);  $^1\text{H}$  NMR (400 MHz, Chloroform-*d*)  $\delta$  7.34 (dd,  $J$  = 10.9, 4.7 Hz, 4H), 7.28 – 7.13 (m, 6H), 5.20 (d,  $J$  = 25.0 Hz, 2H), 1.84 (s, 3H) ppm;  $^{13}\text{C}$  NMR (100 MHz, Chloroform-*d*)  $\delta$  171.8, 143.5, 141.2, 129.1, 127.1, 126.5, 120.9, 19.9 ppm.

#### 1-(10,11-Dihydro-5H-dibenzo[*b,f*]azepin-5-yl)-2-methylprop-2-en-1-one (1q) <sup>1</sup>

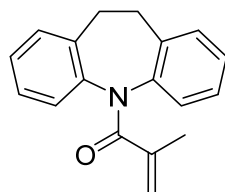

#### General procedure B

White solid (2.3 g, 93% yield);  $^1\text{H}$  NMR (400 MHz, Chloroform-*d*)  $\delta$  7.51 – 7.00 (m, 8H), 5.12 (dt,  $J$  = 19.0, 1.3 Hz, 2H), 3.46 (q,  $J$  = 7.8, 7.4 Hz, 2H), 2.87 (td,  $J$  = 9.4, 8.9, 4.2 Hz, 2H), 1.84 (s, 3H) ppm;  $^{13}\text{C}$  NMR (150 MHz, Chloroform-*d*)  $\delta$  171.0, 140.6, 135.6, 130.1, 128.0, 127.8, 126.7, 118.8, 30.7, 20.3 ppm.

**2-(Methyl(phenyl) carbamoyl) allyl acetate (1r)**<sup>3</sup>

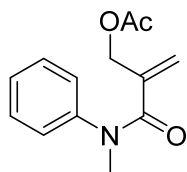

**General procedure D**

Colorless oil (0.5 g, 80% yield);  $^1\text{H}$  NMR (400 MHz, Chloroform-*d*)  $\delta$  7.37 – 7.30 (m, 2H), 7.24 (dd,  $J$  = 2.7, 1.3 Hz, 1H), 7.18 – 7.13 (m, 2H), 5.31 (s, 1H), 5.10 (s, 1H), 4.68 – 4.50 (m, 2H), 3.35 (s, 3H), 2.06 (s, 3H) ppm;  $^{13}\text{C}$  NMR (100 MHz, Chloroform-*d*)  $\delta$  170.2, 168.7, 144.2, 139.1, 129.3, 127.1, 126.7, 122.0, 64.7, 37.8, 20.8 ppm.

***N*-Methyl-*N*-phenyl-2-(trifluoromethyl) acrylamide (1s)**<sup>2</sup>

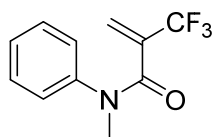

**General procedure C**

Colorless oil (1.4 g, 85% yield);  $^1\text{H}$  NMR (400 MHz, Chloroform-*d*)  $\delta$  7.44 – 7.35 (m, 2H), 7.34 – 7.27 (m, 1H), 7.21 – 7.15 (m, 2H), 5.84 (s, 1H), 5.39 (s, 1H), 3.39 (d,  $J$  = 1.1 Hz, 3H) ppm;  $^{13}\text{C}$  NMR (100 MHz, Chloroform-*d*)  $\delta$  163.6, 143.4, 134.0 (q,  $J$  = 31.6 Hz), 129.5, 127.6, 126.7, 125.5, 121.3 (q,  $J$  = 273.7 Hz), 37.6 ppm.

***N*-Methyl-*N*,2-diphenylacrylamide (1t)**<sup>2</sup>

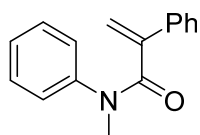

**General procedure C**

White solid (1.9 g, 93% yield);  $^1\text{H}$  NMR (400 MHz, Chloroform-*d*)  $\delta$  7.22 – 6.80 (m, 10H), 5.41 (d,  $J$  = 40.2 Hz, 2H), 3.38 (s, 3H) ppm;  $^{13}\text{C}$  NMR (100 MHz, Chloroform-*d*)  $\delta$  170.4, 145.6, 143.5, 136.7, 128.7, 128.1, 127.8, 126.7, 125.9, 117.6, 37.2 ppm.

***N*-Methyl-*N*-phenylcinnamamide (1u)**<sup>2</sup>

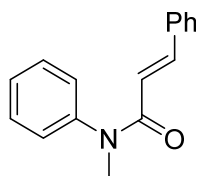

### General procedure C

Colorless oil (1.9 g, 89% yield).  $^1\text{H}$  NMR (400 MHz, Chloroform-*d*)  $\delta$  7.67 (dd,  $J = 15.6, 1.5$  Hz, 1H), 7.42 (td,  $J = 7.9, 7.4, 1.6$  Hz, 2H), 7.35 (dd,  $J = 7.3, 1.6$  Hz, 1H), 7.25 (tdd,  $J = 15.4, 5.5, 2.0$  Hz, 7H), 6.36 (d,  $J = 15.4$  Hz, 1H), 3.40 (s, 3H) ppm;  $^{13}\text{C}$  NMR (100 MHz, Chloroform-*d*)  $\delta$  166.0, 143.6, 141.6, 135.1, 129.5, 129.4, 128.6, 127.7, 127.5, 127.2, 118.7, 37.4 ppm.

### 1-(Indolin-1-yl)-2-methylprop-2-en-1-one<sup>1</sup>

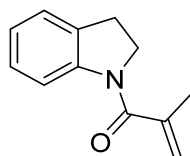

### General procedure B

White solid (1.3 g, 84% yield);  $^1\text{H}$  NMR (400 MHz, Chloroform-*d*)  $\delta$  7.23 – 7.14 (m, 1H), 7.02 (t,  $J = 7.4$  Hz, 1H), 5.39 – 5.16 (m, 2H), 4.09 (t,  $J = 8.3$  Hz, 2H), 3.11 (t,  $J = 8.4$  Hz, 2H), 2.04 (t,  $J = 1.3$  Hz, 3H) ppm;  $^{13}\text{C}$  NMR (100 MHz, Chloroform-*d*)  $\delta$  169.8, 141.7, 132.3, 127.2, 124.8, 123.8, 116.6, 49.6, 27.8, 19.7 ppm.

### 2-Fluoro-N-methyl-N-phenylacrylamide<sup>2</sup>

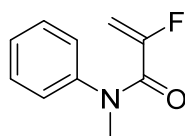

### General procedure C

Colorless oil (0.7 g, 92% yield);  $^1\text{H}$  NMR (600 MHz, Chloroform-*d*)  $\delta$  7.34 (dddd,  $J = 9.2, 8.0, 3.1, 1.5$  Hz, 2H), 7.29 – 7.24 (m, 1H), 7.17 – 7.13 (m, 2H), 5.21 (d,  $J = 45.8$  Hz, 1H), 4.92 (dd,  $J = 15.8, 3.4$  Hz, 1H), 3.31 (d,  $J = 3.2$  Hz, 3H) ppm;  $^{13}\text{C}$  NMR (150 MHz, Chloroform-*d*)  $\delta$  161.6, 161.4, 158.0, 156.2, 143.3, 129.33, 127.4, 125.7, 100.6, 100.5, 38.3 ppm.

### 2-(Hydroxymethyl)-N-methyl-N-phenylacrylamide<sup>3</sup>

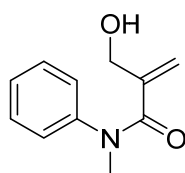

### General procedure D

Colorless oil (2.4 g, 92% yield);  $^1\text{H}$  NMR (400 MHz, Chloroform-*d*)  $\delta$  7.38 – 7.33 (m, 2H), 7.30 – 7.24 (m, 1H), 7.21 – 7.17 (m, 2H), 5.29 (s, 1H), 4.97 (s, 1H), 4.20 (s, 2H), 3.38 (s, 3H) ppm;  $^{13}\text{C}$  NMR (150 MHz, Chloroform-*d*)  $\delta$  165.3, 164.6, 141.0, 139.6, 137.6, 137.5, 129.0, 128.9, 128.9, 125.1, 124.6, 124.5, 123.4, 120.4, 120.3, 120.3, 70.5, 63.6 ppm.

### 2-Benzyl-*N*-methyl-*N*-phenylacrylamide <sup>2</sup>

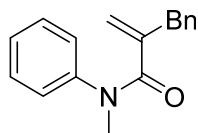

### General procedure C

Colorless oil (1.6 g, 90% yield);  $^1\text{H}$  NMR (600 MHz, Chloroform-*d*)  $\delta$  7.28 – 7.18 (m, 6H), 7.11 – 7.03 (m, 2H), 6.84 – 6.79 (m, 2H), 5.32 – 4.67 (m, 2H), 3.45 (s, 2H), 3.27 (s, 3H) ppm;  $^{13}\text{C}$  NMR (150 MHz, Chloroform-*d*)  $\delta$  170.9, 144.3, 144.2, 137.7, 129.4, 129.0, 128.3, 126.8, 126.7, 126.4, 119.3, 77.2, 77.0, 76.8, 40.2, 37.7 ppm.

### *N*-Methyl-*N*-phenylcyclohex-1-ene-1-carboxamide <sup>2</sup>

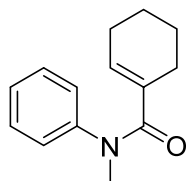

### General procedure C

Colorless oil (1.8 g, 88% yield);  $^1\text{H}$  NMR (600 MHz, Chloroform-*d*)  $\delta$  7.32 – 7.27 (m, 2H), 7.18 (tdd,  $J$  = 7.6, 2.3, 1.1 Hz, 1H), 7.08 (ddd,  $J$  = 7.3, 2.5, 1.3 Hz, 2H), 5.79 (dt,  $J$  = 3.7, 2.0 Hz, 1H), 3.34 – 3.29 (m, 3H), 1.98 – 1.80 (m, 4H), 1.39 (dtt,  $J$  = 29.1, 5.7, 3.0 Hz, 4H) ppm;  $^{13}\text{C}$  NMR (150 MHz, Chloroform-*d*)  $\delta$  172.5, 144.9, 134.5, 132.4, 128.9, 126.4, 126.3, 77.2, 77.0, 76.8, 37.5, 25.8, 24.8, 21.9, 21.3 ppm.

### *N*-Benzyl-*N*-phenylmethacrylamide <sup>1</sup>

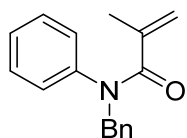

### General procedure B

White solid (1.3 g, 74% yield);  $^1\text{H}$  NMR (400 MHz, Chloroform-*d*)  $\delta$  7.23 (dddd,  $J$  = 11.7, 8.5, 4.4, 2.3 Hz, 9H), 7.02 – 6.90 (m, 2H), 5.01 (dt,  $J$  = 7.6, 1.3 Hz, 2H), 4.96 (s, 2H), 1.77 (s, 3H) ppm;  $^{13}\text{C}$  NMR



(150 MHz, Chloroform-*d*)  $\delta$  171.8, 143.2, 140.7, 137.5, 129.0, 128.4, 127.4, 127.3, 127.1, 119.4, 53.1, 20.4 ppm.

***N*-Methyl-*N*-phenylacrylamide**<sup>1</sup>

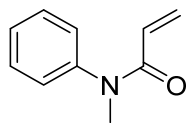

**General procedure B**

White solid (2.8 g, 97% yield); <sup>1</sup>H NMR (400 MHz, Chloroform-*d*)  $\delta$  7.45 – 7.37 (m, 2H), 7.36 – 7.30 (m, 1H), 7.21 – 7.13 (m, 2H), 6.36 (dd, *J* = 16.8, 2.1 Hz, 1H), 6.07 (dd, *J* = 16.8, 10.3 Hz, 1H), 5.51 (dd, *J* = 10.3, 2.1 Hz, 1H), 3.35 (d, *J* = 1.9 Hz, 3H) ppm; <sup>13</sup>C NMR (100 MHz, Chloroform-*d*)  $\delta$  165.7, 143.4, 129.6, 128.5, 127.6, 127.4, 127.3, 37.4 ppm.

***N*-Methyl-*N*-phenyl-2-(((trimethylsilyl)oxy)methyl)acrylamide**

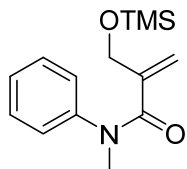

**General procedure D**

Yellow oil (2.5 g, 91% yield); <sup>1</sup>H NMR (400 MHz, Chloroform-*d*)  $\delta$  7.34 (dd, *J* = 8.2, 6.7 Hz, 1H), 7.30 – 7.24 (m, 2H), 7.16 – 7.10 (m, 2H), 5.28 – 5.15 (m, 1H), 4.88 (d, *J* = 1.3 Hz, 1H), 4.16 (s, 2H), 3.29 (s, 3H), 0.03 (d, *J* = 0.6 Hz, 9H) ppm.

**2-(Methoxymethyl)-*N*-methyl-*N*-phenylacrylamide**<sup>3</sup>

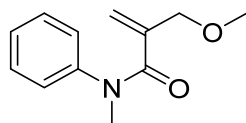

**General procedure D**

Colorless oil (0.23 g, 61% yield); <sup>1</sup>H NMR (600 MHz, Chloroform-*d*)  $\delta$  7.31 (ddq, *J* = 7.9, 4.6, 2.0 Hz, 2H), 7.23 – 7.19 (m, 1H), 7.18 – 7.15 (m, 2H), 5.23 (dt, *J* = 2.6, 1.3 Hz, 1H), 5.04 (d, *J* = 3.3 Hz, 1H), 3.91 (t, *J* = 1.6 Hz, 2H), 3.38 – 3.31 (m, 3H), 3.25 (dd, *J* = 3.3, 1.8 Hz, 3H) ppm; <sup>13</sup>C NMR (150 MHz, Chloroform-*d*)  $\delta$  169.5, 144.2, 141.4, 129.1, 126.8, 126.7, 119.8, 72.9, 58.3, 37.6 ppm.

***tert*-Butyl methacryloyl(phenyl)carbamate**

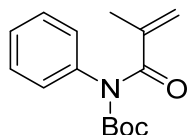

White solid (1.8 g, 94% yield);  $^1\text{H}$  NMR (400 MHz, Chloroform-*d*)  $\delta$  7.45 – 7.36 (m, 2H), 7.34 – 7.28 (m, 1H), 7.19 – 7.13 (m, 2H), 5.97 – 5.07 (m, 2H), 2.06 (d,  $J = 1.2$  Hz, 3H), 1.44 (s, 9H) ppm;  $^{13}\text{C}$  NMR (100 MHz, Chloroform-*d*)  $\delta$  173.7, 153.2, 142.9, 138.6, 129.0, 127.6, 127.6, 118.6, 83.5, 27.8, 27.7, 19.0 ppm.

**1-(9*H*-Carbazol-9-yl)-2-methylprop-2-en-1-one**<sup>1</sup>

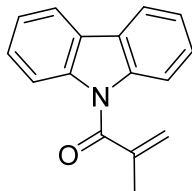

**General procedure B**

Yellow oil (0.7 g, 71% yield);  $^1\text{H}$  NMR (600 MHz, Chloroform-*d*)  $\delta$  8.27 – 7.89 (m, 4H), 7.54 – 7.32 (m, 4H), 5.77 – 5.51 (m, 2H), 2.26 (dd,  $J = 3.1, 1.5$  Hz, 3H) ppm;  $^{13}\text{C}$  NMR (100 MHz, Chloroform-*d*)  $\delta$  170.5, 141.5, 138.6, 126.8, 125.9, 123.4, 122.3, 119.7, 115.7, 19.2 ppm.

### 3. Preparation of gem-bromonitroalkanes

#### 3.1 Preparation of oximes<sup>5,6</sup>

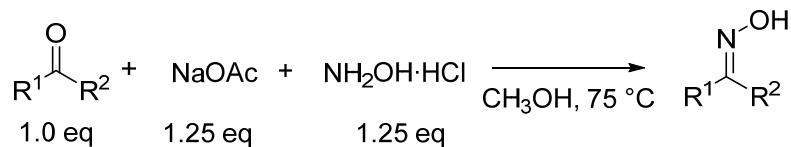

In a round-bottom flask, the ketone (50 mmol) was dissolved in CH<sub>3</sub>OH (100 mL) under N<sub>2</sub> atmosphere, then sodium acetate (5.12 g, 62.5 mmol) and hydroxylamine hydrochloride (4.35 g, 62.5 mmol) were added. The solution was heated at 75 °C to reflux and stirred overnight. After cooling to room temperature, methanol was evaporated and H<sub>2</sub>O (50 mL) was added followed by AcOEt (100 mL). Then the organic layer was washed with saturated brine (50 mL), dried over anhydrous Na<sub>2</sub>SO<sub>4</sub>, and concentrated to give a white solid.

#### 3.2 Preparation of nitro compounds<sup>7-9</sup>

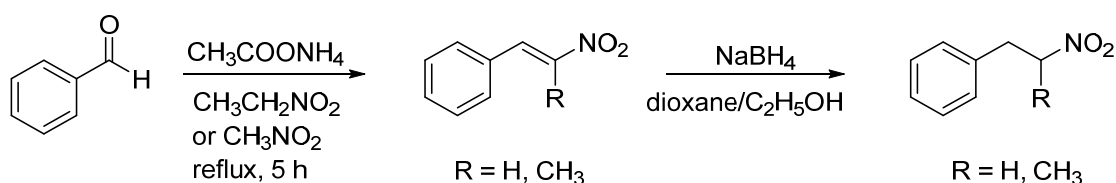

**Step 1:** Benzaldehyde (5.0 g, 47 mmol) and ammonium acetate (0.5 g, 6.5 mmol) were added to nitroethane (20 mL) and the mixture was refluxed for 5 h. After cooling to room temperature, the mixture was partially evaporated with a rotary evaporator, diluted with diethyl ether, and washed twice with water. The organic layer was dried over anhydrous magnesium sulphate, filtered, and concentrated. The remaining residue was recrystallized from petroleum ether to afford (2-nitroprop-1-en-1-yl)benzene.

**Step 2:** A solution of (2-nitroprop-1-en-1-yl)benzene (3.9 g, 24 mmol) in dioxane (40 mL) was added dropwise to an efficiently stirred suspension of sodium borohydride (2.0 g, 52 mmol) in a mixture of dioxane (40 mL) and ethanol (12.5 mL) over a period of 45 min while maintaining a temperature of 30 °C. After the addition was over, stirring was continued for 45 min. The resultant slurry was diluted with ice/water (100 mL) and the excess metal hydride decomposed with 50% aqueous acetic acid. The solution was concentrated under reduced pressure and extracted with chloroform (3 × 50 mL). The organic layer

was washed successively with water (3 × 50 mL) and brine (100 mL) and dried with anhydrous sodium sulfate. The solvent was evaporated and the crude product was purified by flash column chromatography on silica gel.

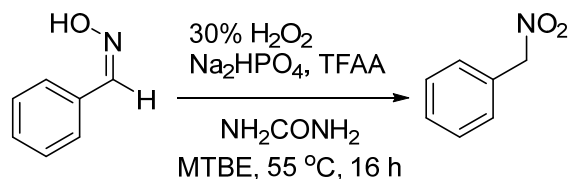

H<sub>2</sub>O<sub>2</sub> (30% in H<sub>2</sub>O, 10.6 g, 93.5 mmol) was slowly added to a cooled (ice-water bath) solution of trifluoroacetic anhydride (14.0 g, 66.8 mmol) in MTBE (50 mL). After further stirring for 15 min, the mixture was poured to a suspension of benzaldoxime (1.63 g, 13.4 mmol), urea (0.4 g, 6.68 mmol) and Na<sub>2</sub>HPO<sub>4</sub>·2 H<sub>2</sub>O (13.6 g, 76.1 mmol) in MTBE (50 mL). The resulting mixture was stirred at 55 °C for 16 h. After cooling to ambient temperature, the mixture was filtered, diluted with saturated aqueous NH<sub>4</sub>Cl solution (50 mL) and extracted with MTBE (3 × 50 mL). The combined organic layers were dried over anhydrous Na<sub>2</sub>SO<sub>4</sub>, filtered and the solvent was evaporated in vacuo to furnish the compound (1.75 g, 95%) as yellow oil, which did not require further purification.

#### 2-Nitrobutane<sup>10</sup>

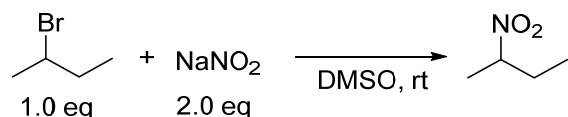

2-Bromobutane (5.5 mL, 40 mmol) was added to a stirred mixture of NaNO<sub>2</sub> (5.5 g, 80 mmol) and DMSO (100 mL). After stirring for 6 h, the reaction mixture was poured into ice-water (60 mL) and layered with hexanes (100 mL). The aq. phase was extracted with hexanes. Then the organic layers were washed with water (2 × 50 mL), dried over anhydrous Na<sub>2</sub>SO<sub>4</sub>, filtered, concentrated at 30 °C under vacuum (20 Torr) to afford the product as blue oil (2.5 g, 61% yield).

#### 6-Nitro-1-hexene or 1-Nitrododecane<sup>10</sup>

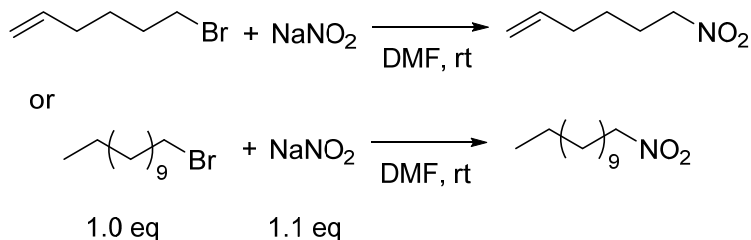

To a stirred solution of sodium nitrite (1.42 g, 20.56 mmol) in DMF (40 mL) was added 6-bromohex-1-ene (2.50 mL, 18.7 mmol), and the reaction mixture was stirred at room temperature for 2 hours. The pale yellow solution was then partitioned between ice-water (100 mL) and diethyl ether (50 mL), and the

organic phase was separated. The aqueous layer was extracted with diethyl ether (3 × 50 mL), and the combined organic extracts were subsequently washed with water (2 × 50 mL), dried over anhydrous Na<sub>2</sub>SO<sub>4</sub>, and concentrated under reduced pressure. Purification by flash column chromatography (petroleum ether) afforded the product as a pale yellow oil (1.0 g, 42% yield).

### 3.3 Preparation of *gem*-bromonitroalkanes

#### General procedure E<sup>11</sup>

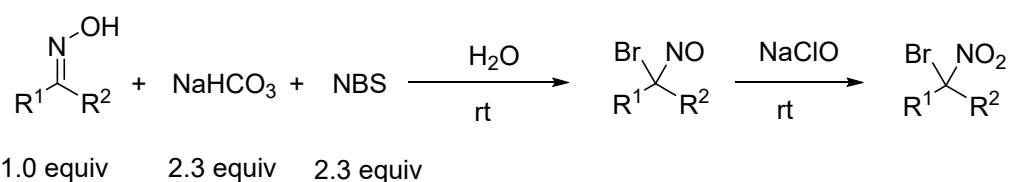

The corresponding oxime (25.0 mmol) was added to a solution of sodium bicarbonate (4.80 g, 57.5 mmol) in 150 mL of water followed by *N*-bromosuccinimide (10.2 g, 57.5 mmol). The reaction mixture was stirred at rt overnight and extracted with AcOEt, and the organic layers were washed with brine and dried over Na<sub>2</sub>SO<sub>4</sub>. After evaporation of solvents, the residue of bromonitrosoalkane was diluted with benzene (50 mL). To the benzene solution were added tetrabutylammonium hydrogensulfate (4.25 g, 12.5 mmol) and sodium hypochlorite solution (ca. 1.3 M, 60 mL) in portions. Stirring was continued until blue or green color of the reaction mixture faded. After separation and concentration of the organic phase, the crude product was purified by flash column chromatography on silica gel (petroleum ether).

#### General procedure F<sup>12</sup>

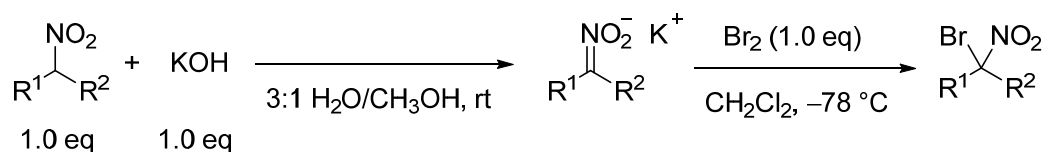

The respective nitro compound (30.0 mmol) was added to a mixture of solid KOH (85%, 2.0 g, 30.0 mmol), CH<sub>3</sub>OH (25 mL) and H<sub>2</sub>O (75 mL) at room temperature. The mixture was vigorously stirred until complete dissolution of the starting nitro compound (ca. 30 min), and then cooled to 0 °C. Bromine (1.52 mL, 30 mmol) in CH<sub>2</sub>Cl<sub>2</sub> (50 mL, precooled to -78 °C) was added in one pot. The cooling bath was removed, and the mixture was vigorously stirred for 5 min. After separation and concentration of the organic phase, the crude product was chromatographed on silica gel (petroleum ether).

### 5-Bromo-2,2-dimethyl-5-nitro-1,3-dioxane<sup>13</sup>

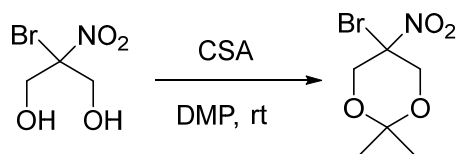

To a solution of 2-bromo-2-nitro-1,3-propanediol (20.0 g, 0.101 mol) in 2,2-dimethoxypropane (80 mL) was added *L*-camphor-10-sulfonic acid (1.62 g, 8.09 mmol). The mixture was stirred for 3 d at rt under a nitrogen atmosphere. The solvent was evaporated with a rotary evaporator and the residual solid was purified by chromatography on silica gel (petroleum ether) to give a white solid (70% yield).

## 3.4 Physical data

### Cyclobutanone oxime<sup>14</sup>

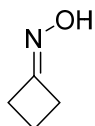

White solid (3.6 g, 87% yield); <sup>1</sup>H NMR (600 MHz, Chloroform-*d*) δ 8.66 (s, 1H), 2.95 (t, *J* = 8.1 Hz, 2H), 2.90 (t, *J* = 8.1 Hz, 2H), 2.00 (p, *J* = 8.0 Hz, 2H) ppm; <sup>13</sup>C NMR (150 MHz, Chloroform-*d*) δ 159.8, 31.4, 30.5, 14.4 ppm.

### Oxetan-3-one oxime<sup>14</sup>

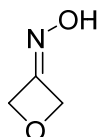

White solid (2.4 g, 80% yield); <sup>1</sup>H NMR (600 MHz, Chloroform-*d*) δ 8.26 (s, 1H), 5.35 – 5.33 (m, 2H), 5.30 – 5.27 (m, 2H) ppm; <sup>13</sup>C NMR (150 MHz, Chloroform-*d*) δ 153.6, 78.9 ppm.

### *tert*-Butyl 3-(hydroxyimino)azetidine-1-carboxylate<sup>14</sup>

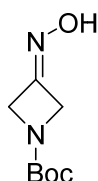

White solid (4.8 g, 90% yield); <sup>1</sup>H NMR (600 MHz, Chloroform-*d*) δ 8.09 (s, 1H), 4.81 – 4.21 (m, 4H), 1.46 (q, *J* = 1.3 Hz, 9H) ppm.

### Cycloheptanone oxime<sup>15</sup>

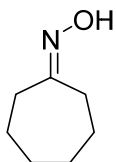

White solid (3.6 g, 79% yield);  $^1\text{H}$  NMR (600 MHz, Chloroform-*d*)  $\delta$  9.93 (br, 1H), 2.55 (s, 2H), 2.35 (s, 2H), 1.78 – 1.41 (m, 8H) ppm;  $^{13}\text{C}$  NMR (150 MHz, Chloroform-*d*)  $\delta$  164.1, 33.6, 30.3, 30.2, 28.5, 27.4, 24.4 ppm.

**Adamantan-2-one oxime**<sup>15</sup>

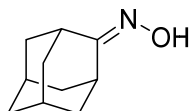

White solid (3.7 g, 82% yield);  $^1\text{H}$  NMR (600 MHz, Chloroform-*d*)  $\delta$  8.90 (s, 1H), 3.57 (s, 1H), 2.57 (s, 1H), 2.00 – 1.90 (m, 6H), 1.87 – 1.81 (m, 6H) ppm;  $^{13}\text{C}$  NMR (150 MHz, Chloroform-*d*)  $\delta$  166.8, 38.9, 37.4, 36.5, 36.2, 28.7, 27.8 ppm.

**4-(*tert*-Butyl)cyclohexan-1-one oxime**<sup>15</sup>

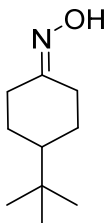

White solid (4.0 g, 91% yield);  $^1\text{H}$  NMR (600 MHz, Chloroform-*d*)  $\delta$  9.19 (s, 1H), 3.37 (d,  $J$  = 12.3 Hz, 1H), 2.44 (d,  $J$  = 13.9 Hz, 1H), 2.06 (td,  $J$  = 13.4, 4.8 Hz, 1H), 1.98 – 1.88 (m, 2H), 1.69 (td,  $J$  = 14.0, 5.3 Hz, 1H), 1.31 – 1.07 (m, 3H), 0.86 (s, 9H) ppm;  $^{13}\text{C}$  NMR (150 MHz, Chloroform-*d*)  $\delta$  160.8, 32.5, 31.9, 27.5, 26.3, 24.3 ppm.

**Tetrahydro-4*H*-pyran-4-one oxime**<sup>16</sup>

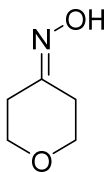

White solid (4.0 g, 87% yield);  $^1\text{H}$  NMR (400 MHz, Chloroform-*d*)  $\delta$  9.04 (s, 1H), 3.81 (t,  $J$  = 5.7 Hz, 2H), 3.76 (t,  $J$  = 5.8 Hz, 2H), 2.67 (t,  $J$  = 5.8 Hz, 2H), 2.37 (t,  $J$  = 5.6 Hz, 2H) ppm;  $^{13}\text{C}$  NMR (100 MHz, Chloroform-*d*)  $\delta$  156.0, 68.2, 66.7, 32.2, 25.9 ppm.

**(*E*)-Benzaldehyde oxime**

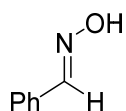

Yellow solid (90% yield);  $^1\text{H}$  NMR (600 MHz, Chloroform-*d*)  $\delta$  9.51 (s, 1H), 8.18 (s, 1H), 7.57 (ddt,  $J = 3.9, 2.7, 1.6$  Hz, 2H), 7.45 – 7.21 (m, 3H) ppm;  $^{13}\text{C}$  NMR (100 MHz, Chloroform-*d*)  $\delta$  150.4, 131.8, 130.0, 128.7, 127.0 ppm.

### 2-Nitrobutane

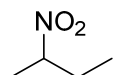

Blue oil (2.5 g, 61%);  $^1\text{H}$  NMR (600 MHz, Chloroform-*d*)  $\delta$  4.41 (d,  $J = 6.7$  Hz, 1H), 1.95 – 1.64 (m, 2H), 1.47 – 1.34 (m, 3H), 0.90 – 0.81 (m, 3H) ppm;  $^{13}\text{C}$  NMR (150 MHz, Chloroform-*d*)  $\delta$  84.6, 28.1, 18.4, 9.7 ppm.

### (Nitromethyl)benzene

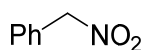

Yellow oil (1.85 g, 45%);  $^1\text{H}$  NMR (600 MHz, Chloroform-*d*)  $\delta$  8.01 (d,  $J = 13.7$  Hz, 1H), 7.59 (d,  $J = 13.7$  Hz, 1H), 7.56 – 7.54 (m, 2H), 7.53 – 7.49 (m, 1H), 7.47 – 7.44 (m, 2H) ppm;  $^{13}\text{C}$  NMR (150 MHz, Chloroform-*d*)  $\delta$  139.0, 137.1, 132.1, 130.1, 129.4, 129.1 ppm.

### 1-Nitrododecane

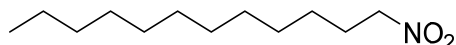

Yellow oil (2.2 g, 63%);  $^1\text{H}$  NMR (400 MHz, Chloroform-*d*)  $\delta$  4.37 (t,  $J = 7.1$  Hz, 2H), 2.23 – 1.89 (m, 2H), 1.25 (s, 18H), 0.87 (t,  $J = 6.7$  Hz, 3H) ppm.

### 6-Nitrohex-1-ene

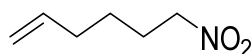

Yellow oil (1.0 g, 42%);  $^1\text{H}$  NMR (400 MHz, Chloroform-*d*)  $\delta$  5.76 (ddt,  $J = 17.0, 10.3, 6.7$  Hz, 1H), 5.17 – 4.90 (m, 2H), 4.38 (td,  $J = 7.0, 2.5$  Hz, 2H), 2.43 – 1.91 (m, 4H), 1.49 (tt,  $J = 7.4, 6.4$  Hz, 2H) ppm.

### (2-Nitroprop-1-en-1-yl)benzene

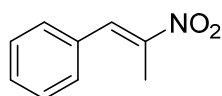

White solid (3.6 g, 85% yield);  $^1\text{H}$  NMR (600 MHz, Chloroform-*d*)  $\delta$  8.09 (s, 1H), 7.48 – 7.41 (m, 5H), 2.46 (s, 3H) ppm;  $^{13}\text{C}$  NMR (150 MHz, Chloroform-*d*)  $\delta$  147.8, 133.5, 132.4, 129.9, 129.9, 128.9, 14.0



ppm.

### (2-Nitropropyl)benzene

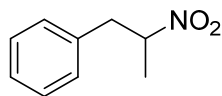

White solid (4.1 g, 83% yield);  $^1\text{H}$  NMR (600 MHz, Chloroform-*d*)  $\delta$  7.29 – 7.25 (m, 2H), 7.24 – 7.21 (m, 1H), 7.15 – 7.12 (m, 2H), 4.78 – 4.70 (m, 1H), 3.26 (dd,  $J = 14.0, 7.6$  Hz, 1H), 2.97 (dd,  $J = 14.0, 6.6$  Hz, 1H), 1.48 (d,  $J = 6.6$  Hz, 3H) ppm;  $^{13}\text{C}$  NMR (150 MHz, Chloroform-*d*)  $\delta$  135.4, 128.8, 128.6, 127.2, 84.3, 40.9, 18.6 ppm.

### 1-Bromo-1-nitroethane (2a)<sup>17,18</sup>

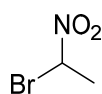

#### General procedure F

Yellow oil (4.3 g, 94% yield);  $^1\text{H}$  NMR (600 MHz, Chloroform-*d*)  $\delta$  6.04 (q,  $J = 6.4$  Hz, 1H), 2.14 (d,  $J = 6.5$  Hz, 3H) ppm;  $^{13}\text{C}$  NMR (150 MHz, Chloroform-*d*)  $\delta$  74.5, 24.2 ppm.

### 1-Bromo-1-nitropropane (2b)<sup>17,18</sup>

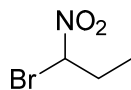

#### General procedure F

Yellow oil (4.2 g, 86% yield);  $^1\text{H}$  NMR (600 MHz, Chloroform-*d*)  $\delta$  5.93 – 5.80 (m, 1H), 2.53 – 2.19 (m, 2H), 1.06 (t,  $J = 7.3$  Hz, 3H) ppm;  $^{13}\text{C}$  NMR (150 MHz, Chloroform-*d*)  $\delta$  81.2, 31.0, 10.4 ppm.

### 2-Bromo-2-nitropropane (2d)<sup>19</sup>

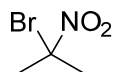

#### General procedure F

Yellow oil (3.5 g, 93% yield);  $^1\text{H}$  NMR (600 MHz, Chloroform-*d*)  $\delta$  2.26 (d,  $J = 7.6$  Hz, 6H) ppm.

### (2-Bromo-2-nitropropyl)benzene (2e)

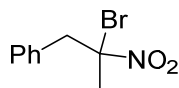

#### General procedure F

White solid (1.0 g, 75% yield);  $^1\text{H}$  NMR (400 MHz, Chloroform-*d*)  $\delta$  7.33 (q,  $J = 2.5, 1.8$  Hz, 2H), 7.19 (dd,  $J = 6.6, 3.1$  Hz, 2H), 3.87 (d,  $J = 14.3$  Hz, 1H), 3.63 (d,  $J = 14.3$  Hz, 1H), 2.17 (s, 3H) ppm;  $^{13}\text{C}$

NMR (150 MHz, Chloroform-*d*)  $\delta$  133.1, 130.3, 128.7, 128.2, 93.6, 77.2, 77.0, 76.8, 49.4, 29.0 ppm.

### 1-Bromo-1-nitrocyclobutane (2f)

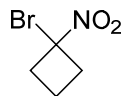

### General procedure E

Yellow oil (3.5 g, 72% yield);  $^1\text{H}$  NMR (400 MHz, Chloroform-*d*)  $\delta$  3.29 – 3.17 (m, 2H), 2.92 – 2.77 (m, 2H), 2.30 – 2.12 (m, 1H), 1.97 (dtt,  $J = 11.3, 9.6, 5.0$  Hz, 1H) ppm;  $^{13}\text{C}$  NMR (100 MHz, Chloroform-*d*)  $\delta$  84.4, 39.6, 13.6 ppm.

### Methyl 3-bromo-3-nitrocyclobutane-1-carboxylate (2g)

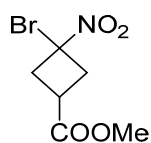

### General procedure E

Yellow oil (2.0 g, 60% yield);  $^1\text{H}$  NMR (600 MHz, Chloroform-*d*)  $\delta$  3.63 (d,  $J = 21.9$  Hz, 3H), 3.51 – 3.42 (m, 1H), 3.39 – 3.31 (m, 1H), 3.28 – 3.17 (m, 1H), 3.17 – 3.11 (m, 1H), 3.02 – 2.94 (m, 1H) ppm;  $^{13}\text{C}$  NMR (100 MHz, Chloroform-*d*)  $\delta$  172.1, 172.0, 81.6, 79.5, 52.2, 52.2, 42.3, 42.1, 31.9, 28.4 ppm.

### *tert*-Butyl 3-bromo-3-nitroazetidine-1-carboxylate (2h)

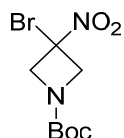

### General procedure E

Blue solid (2.5 g, 83% yield);  $^1\text{H}$  NMR (400 MHz, Chloroform-*d*)  $\delta$  4.89 (dd,  $J = 11.3, 1.6$  Hz, 2H), 4.50 (dd,  $J = 11.3, 1.6$  Hz, 2H), 1.45 (s, 9H) ppm;  $^{13}\text{C}$  NMR (101 MHz, Chloroform-*d*)  $\delta$  155.2, 81.6, 75.9, 64.5, 28.1 ppm; IR (film)  $\nu_{\text{max}}$  1697, 1582, 1366, 1157, 756  $\text{cm}^{-1}$ ; HRMS (ESI-TOF)  $m/z$ :  $[\text{M} + \text{H}]^+$  Calcd for  $\text{C}_8\text{H}_{14}\text{N}_2\text{O}_4\text{Br}$  281.0131; Found 281.0127.

### 5-Bromo-2,2-dimethyl-5-nitro-1,3-dioxane (2i)

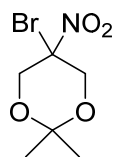

White solid (16.1g, 70% yield);  $^1\text{H}$  NMR (600 MHz, Chloroform-*d*)  $\delta$  4.77 (dd,  $J = 13.3, 1.6$  Hz, 2H), 4.26 (d,  $J = 13.4$  Hz, 2H), 1.53 (s, 3H), 1.37 (s, 3H) ppm;  $^{13}\text{C}$  NMR (150 MHz, Chloroform-*d*)  $\delta$  99.4,

66.1, 27.8, 18.4 ppm.

**(Bromo(nitro)methyl)benzene<sup>20</sup>**

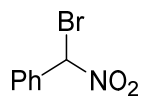

**General procedure F**

Yellow oil (329 mg, 38% yield); <sup>1</sup>H NMR (400 MHz, Chloroform-*d*) δ 7.68 – 7.60 (m, 2H), 7.49 – 7.41 (m, 3H), 6.91 (s, 1H) ppm; <sup>13</sup>C NMR (100 MHz, Chloroform-*d*) δ 132.8, 131.4, 129.2, 128.2, 80.4 ppm.

**(2-Bromo-2-nitroethyl)benzene<sup>21</sup>**

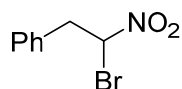

**General procedure F**

Yellow oil (1.1 g, 75% yield); <sup>1</sup>H NMR (400 MHz, Chloroform-*d*) δ 7.38 – 7.31 (m, 3H), 7.21 (dd, *J* = 7.3, 2.3 Hz, 2H), 6.06 (dd, *J* = 8.3, 6.1 Hz, 1H), 3.76 (dd, *J* = 14.5, 8.2 Hz, 1H), 3.52 (dd, *J* = 14.5, 6.1 Hz, 1H) ppm; <sup>13</sup>C NMR (100 MHz, Chloroform-*d*) δ 133.2, 129.1, 129.0, 128.3, 79.2, 43.4 ppm.

**1-Bromo-1-nitrododecane**

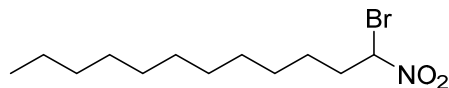

**General procedure F**

Colorless oil (2.3 g, 84% yield); <sup>1</sup>H NMR (400 MHz, Chloroform-*d*) δ 2.87 – 2.79 (m, 2H), 1.60 (q, *J* = 7.6 Hz, 2H), 1.48 – 1.18 (m, 18H), 0.88 (t, *J* = 6.6 Hz, 3H) ppm; <sup>13</sup>C NMR (100 MHz, Chloroform-*d*) δ 87.9, 49.1, 31.9, 29.5, 29.5, 29.3, 29.3, 29.1, 28.3, 27.2, 22.7, 14.1 ppm.

**2-Bromo-2-nitrobutane<sup>22</sup>**

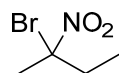

**General procedure F**

Yellow oil (1.2 g, 75% yield); <sup>1</sup>H NMR (400 MHz, Chloroform-*d*) δ 2.55 – 2.34 (m, 2H), 2.21 (s, 3H), 1.04 (t, *J* = 7.3 Hz, 3H) ppm; <sup>13</sup>C NMR (100 MHz, Chloroform-*d*) δ 96.1, 37.9, 29.4, 9.9 ppm.

**4-Bromo-4-nitroheptane**

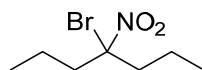

**General procedure E**



99.3, 43.0, 27.9, 23.0 ppm.

**(1*r*,3*r*,5*r*,7*r*)-2-Bromo-2-nitroadamantane**

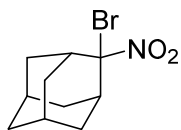

**General procedure E**

Colorless oil (1.2 g, 43% yield);  $^1\text{H}$  NMR (600 MHz, Chloroform-*d*)  $\delta$  2.90 (s, 2H), 2.37 (d,  $J = 13.7$  Hz, 2H), 1.98 (d,  $J = 14.6$  Hz, 2H), 1.95 – 1.75 (m, 8H) ppm;  $^{13}\text{C}$  NMR (150 MHz, Chloroform-*d*)  $\delta$  102.5, 38.3, 37.6, 35.0, 34.5, 26.1, 25.6 ppm.

**4-Bromo-4-nitrotetrahydro-2*H*-pyran**

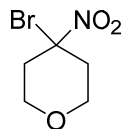

**General procedure E**

Yellow oil (2.5 g, 71% yield);  $^1\text{H}$  NMR (400 MHz, Chloroform-*d*)  $\delta$  = 4.53 (tt,  $J = 9.9, 4.7$  Hz, 1H), 4.01 (dt,  $J = 12.1, 4.0$  Hz, 2H), 3.46 (ddd,  $J = 12.1, 10.4, 2.9$  Hz, 2H), 2.25 – 2.05 (m, 4H) ppm;  $^{13}\text{C}$  NMR (100 MHz, Chloroform-*d*)  $\delta$  = 80.7, 65.3, 30.5 ppm.

## 4. Photocatalytic radical reactions

### 4.1 Typical procedure

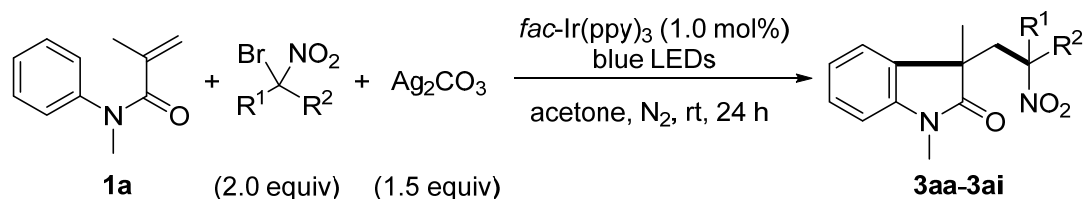

A dry Schlenk tube charged with a stirring bar was evacuated and backfilled with N<sub>2</sub> (three times). *N*-Methyl-*N*-phenylmethacrylamide (**1a**, 80 mg, 0.45 mmol), 1-bromo-1-nitrocyclobutane (**2f**, 0.15 mL, 0.90 mmol), Ag<sub>2</sub>CO<sub>3</sub> (250 mg, 0.90 mmol) and anhydrous acetone (8.0 mL) were added under N<sub>2</sub> atmosphere followed by *fac*-Ir(ppy)<sub>3</sub> (5.0 mg, 1.0 mol%). The reaction mixture was degassed by freeze-pump-thaw method and then stirred under irradiation with blue LEDs (456 nm, approximately 3.0 cm distance from the tube). The mixture was maintained at approximately 25 °C by a desk fan in air-conditioned room. The reaction was monitored by TLC. Upon completion (24 h), the mixture was concentrated in vacuo. The crude product was purified by flash chromatography on silica gel (10:1 hexanes/AcOEt) to give **3af**.

### 4.2 Physical data

#### (3*R*\*)-1,3-Dimethyl-3-((*R*\*)-2-nitropropyl)indolin-2-one (**3aa**)

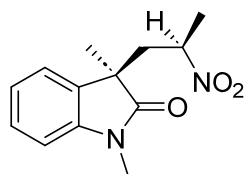

Yellow oil;  $R_f = 0.3$  (5:1 hexanes/AcOEt, less polar); <sup>1</sup>H NMR (600 MHz, Chloroform-*d*)  $\delta$  7.36 – 7.29 (m, 1H), 7.14 (dd,  $J = 7.4, 2.6$  Hz, 1H), 7.07 (dddd,  $J = 8.6, 7.5, 2.8, 1.5$  Hz, 1H), 6.86 (d,  $J = 7.9$  Hz, 1H), 4.17 (ttq,  $J = 8.2, 4.2, 2.0, 1.4$  Hz, 1H), 3.33 – 3.20 (m, 3H), 2.74 (ddt,  $J = 14.9, 8.3, 2.0$  Hz, 1H), 2.30 (ddt,  $J = 14.9, 4.2, 2.0$  Hz, 1H), 1.41 – 1.37 (m, 6H) ppm; <sup>13</sup>C NMR (150 MHz, Chloroform-*d*)  $\delta$  179.2, 143.0, 130.6, 128.7, 123.3, 122.9, 108.4, 80.6, 47.0, 41.6, 26.3, 25.0, 20.7 ppm; IR (film)  $\nu_{max}$  1605, 1366, 1103, 748, 594 cm<sup>-1</sup>; HRMS (ESI-TOF)  $m/z$ : [M + H]<sup>+</sup> Calcd for C<sub>13</sub>H<sub>17</sub>N<sub>2</sub>O<sub>3</sub> 249.1233; Found 249.1235.

Note: A 1:1 mixture of two diastereomers was obtained as a yellow oil (94 mg, 88% total yield).

**(3*R*\*)-1,3-Dimethyl-3-((2*R*\*)-2-nitrobutyl)indolin-2-one (3ab)**

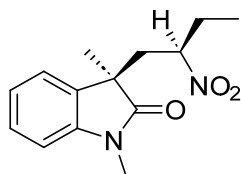

Yellow oil;  $R_f = 0.3$  (5:1 hexanes/AcOEt, less polar);  $^1\text{H NMR}$  (600 MHz, Chloroform-*d*)  $\delta$  7.30 (td,  $J = 7.7, 1.3$  Hz, 1H), 7.11 (dd,  $J = 7.3, 1.3$  Hz, 1H), 7.05 (td,  $J = 7.5, 0.9$  Hz, 1H), 6.86 (dt,  $J = 7.8, 0.8$  Hz, 1H), 3.99 (tdd,  $J = 9.4, 4.8, 2.6$  Hz, 1H), 3.26 (s, 3H), 2.70 (dd,  $J = 15.1, 9.5$  Hz, 1H), 2.28 (dd,  $J = 15.1, 2.6$  Hz, 1H), 1.82 (ddq,  $J = 14.6, 9.3, 7.3$  Hz, 1H), 1.67 (dq,  $J = 14.7, 7.4, 4.7$  Hz, 1H), 1.37 (s, 3H), 0.81 (t,  $J = 7.4$  Hz, 3H) ppm;  $^{13}\text{C NMR}$  (150 MHz, Chloroform-*d*)  $\delta$  179.2, 143.0, 130.6, 128.5, 123.3, 122.8, 108.2, 86.9, 47.1, 40.1, 26.2, 24.7, 9.7 ppm; IR (film)  $\nu_{\text{max}}$  2955, 1705, 1589, 1466, 1358, 1265, 1111, 748  $\text{cm}^{-1}$ ; HRMS (ESI-TOF)  $m/z$ :  $[\text{M} + \text{H}]^+$  Calcd for  $\text{C}_{14}\text{H}_{19}\text{N}_2\text{O}_3$  263.1390; Found 263.1392.

Note: A 1:1 mixture of two diastereomers was obtained as a yellow oil (80 mg, 67% total yield).

**(3*R*\*)-1,3-Dimethyl-3-((2*S*\*)-2-nitrobutyl)indolin-2-one (3ab)**

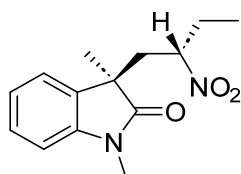

Yellow oil;  $R_f = 0.3$  (5:1 hexanes/AcOEt, more polar);  $^1\text{H NMR}$  (600 MHz, Chloroform-*d*)  $\delta$  7.46 – 7.27 (m, 1H), 7.19 – 7.05 (m, 2H), 6.90 (dt,  $J = 7.8, 1.0$  Hz, 1H), 4.26 (tddd,  $J = 6.5, 4.9, 2.5, 1.0$  Hz, 1H), 3.35 – 3.13 (m, 3H), 2.91 – 2.69 (m, 1H), 2.01 (ddd,  $J = 15.3, 2.6, 1.1$  Hz, 1H), 1.82 (dtt,  $J = 14.2, 7.1, 2.0$  Hz, 1H), 1.58 (dddd,  $J = 14.4, 7.2, 5.1, 1.9$  Hz, 1H), 1.46 – 1.29 (m, 3H), 0.93 – 0.72 (m, 3H) ppm;  $^{13}\text{C NMR}$  (150 MHz, Chloroform-*d*)  $\delta$  178.6, 143.1, 132.2, 128.5, 122.7, 122.3, 108.4, 86.1, 46.3, 40.4, 28.4, 26.0, 23.4, 9.8 ppm; IR (film)  $\nu_{\text{max}}$  2963, 1713, 1612, 1474, 1366, 1119, 748  $\text{cm}^{-1}$ ; HRMS (ESI-TOF)  $m/z$ :  $[\text{M} + \text{H}]^+$  Calcd for  $\text{C}_{14}\text{H}_{19}\text{N}_2\text{O}_3$  263.1390; Found 263.1392.

Note: A 1:1 mixture of two diastereomers was obtained as a yellow oil (80 mg, 67% total yield).

**1,3-Dimethyl-3-(2-nitroethyl)indolin-2-one (3ac)**

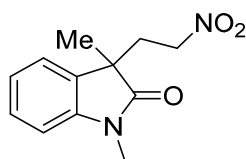

Yellow oil (66 mg, 62% yield);  $R_f = 0.3$  (5:1 hexanes/AcOEt);  $^1\text{H NMR}$  (400 MHz, Chloroform-*d*)  $\delta$  7.36 – 7.28 (m, 1H), 7.26 – 7.01 (m, 2H), 6.89 (d,  $J = 7.8$  Hz, 1H), 4.15 (dddd,  $J = 55.5, 13.4, 9.8, 5.8$  Hz, 2H), 3.23 (s, 3H), 2.74 – 2.39 (m, 2H), 1.43 (s, 3H) ppm;  $^{13}\text{C NMR}$  (100 MHz, Chloroform-*d*)  $\delta$  178.7, 142.8, 131.6, 128.7, 123.0, 122.6, 108.5, 71.3, 46.0, 34.4, 26.2, 23.5 ppm; IR (film)  $\nu_{\text{max}}$  2947, 1605, 1366, 1103, 756  $\text{cm}^{-1}$ ; HRMS (ESI-TOF)  $m/z$ :  $[\text{M} + \text{H}]^+$  Calcd for  $\text{C}_{12}\text{H}_{15}\text{N}_2\text{O}_3$  235.1077; Found 235.1080.

**1,3-Dimethyl-3-(2-methyl-2-nitropropyl)indolin-2-one (3ad)**

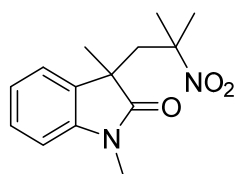

White solid (70 mg, 60% yield);  $R_f = 0.3$  (5:1 hexanes/AcOEt); m.p. 93.6–94.5 °C;  $^1\text{H NMR}$  (400 MHz, Chloroform-*d*)  $\delta$  7.34 – 7.24 (m, 1H), 7.12 – 7.01 (m, 2H), 6.86 (dt,  $J = 7.8, 0.8$  Hz, 1H), 3.23 (s, 3H), 2.98 (d,  $J = 15.4$  Hz, 1H), 2.56 (d,  $J = 15.3$  Hz, 1H), 1.45 (s, 3H), 1.33 (s, 3H), 1.16 (s, 3H) ppm;  $^{13}\text{C NMR}$  (100 MHz, Chloroform-*d*)  $\delta$  179.8, 142.8, 130.1, 128.4, 124.1, 122.8, 108.3, 86.7, 46.5, 45.8, 30.0, 27.8, 26.4, 22.5 ppm; IR (film)  $\nu_{\text{max}}$  1713, 1605, 1474, 1358, 1119, 756  $\text{cm}^{-1}$ ; HRMS (ESI-TOF)  $m/z$ :  $[\text{M} + \text{H}]^+$  Calcd for  $\text{C}_{14}\text{H}_{19}\text{N}_2\text{O}_3$  263.1390; Found 263.1392.

**(3*R*\*)-1,3-Dimethyl-3-((2*R*\*)-2-methyl-2-nitro-3-phenylpropyl)indolin-2-one (3ae)**

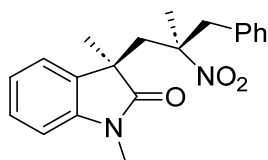

White solid;  $R_f = 0.2$  (10:1 hexanes/AcOEt, less polar); m.p. 184.0–185.2 °C;  $^1\text{H NMR}$  (600 MHz, Chloroform-*d*)  $\delta$  7.29 – 7.16 (m, 5H), 7.12 – 6.88 (m, 4H), 3.39 – 3.12 (m, 5H), 2.85 (ddt,  $J = 32.1, 13.7, 2.5$  Hz, 1H), 2.65 (dddd,  $J = 15.8, 10.3, 5.1, 2.3$  Hz, 1H), 1.37 (dt,  $J = 23.5, 2.4$  Hz, 3H), 1.18 – 0.97 (m, 3H) ppm;  $^{13}\text{C NMR}$  (150 MHz, Chloroform-*d*)  $\delta$  180.0, 178.7, 142.8, 142.6, 134.5, 133.6, 131.8, 130.2, 130.0, 129.6, 128.5, 128.4, 128.4, 128.3, 127.6, 127.3, 124.3, 123.3, 122.8, 122.6, 108.5, 108.3, 90.7, 90.1, 77.2, 77.0, 76.8, 48.6, 46.7, 46.5, 46.4, 45.4, 45.3, 27.9, 27.7, 26.4, 26.3, 26.3, 21.5, 18.1 ppm; IR (film)  $\nu_{\text{max}}$  2940, 1713, 1605, 1551, 1474, 1358, 1126, 910, 741  $\text{cm}^{-1}$ ; HRMS (ESI-TOF)  $m/z$ :  $[\text{M} + \text{H}]^+$  Calcd for  $\text{C}_{20}\text{H}_{23}\text{N}_2\text{O}_3$  339.1703; Found 339.1701.

Note: A 1:1 mixture of two diastereomers was obtained as a white solid (50 mg, 30% total yield).

**1,3-Dimethyl-3-((1-nitrocyclobutyl)methyl)indolin-2-one (3af)**



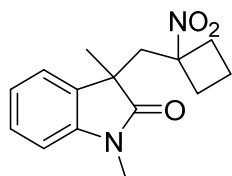

White solid (100 mg, 80% yield);  $R_f = 0.3$  (5:1 hexanes/AcOEt); m.p. 101.7–102.0 °C;  $^1\text{H NMR}$  (400 MHz, Chloroform-*d*)  $\delta$  7.34 – 7.19 (m, 1H), 7.12 – 6.95 (m, 2H), 6.81 (d,  $J = 7.8$  Hz, 1H), 3.41 – 3.05 (m, 3H), 2.97 – 2.66 (m, 2H), 2.58 – 2.43 (m, 1H), 2.38 – 2.12 (m, 3H), 1.86 – 1.70 (m, 2H), 1.34 (s, 3H) ppm;  $^{13}\text{C NMR}$  (100 MHz, Chloroform-*d*)  $\delta$  179.3, 143.1, 130.2, 128.4, 123.7, 122.5, 108.1, 87.8, 46.3, 43.8, 36.4, 29.4, 26.3, 26.2, 14.1 ppm; IR (film)  $\nu_{\text{max}}$  3241, 1613, 1366, 1103, 741  $\text{cm}^{-1}$ ; HRMS (ESI-TOF)  $m/z$ :  $[\text{M} + \text{H}]^+$  Calcd for  $\text{C}_{15}\text{H}_{18}\text{N}_2\text{O}_3$  275.1390; Found 275.1391.

**Methyl 3-((1,3-dimethyl-2-oxoindolin-3-yl)methyl)-3-nitrocyclobutane-1-carboxylate (3ag)**

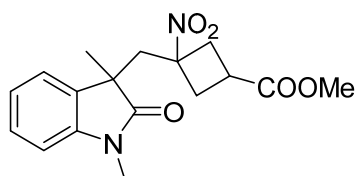

Yellow oil (70 mg, 66% yield);  $R_f = 0.1$  (5:1 hexanes/AcOEt);  $^1\text{H NMR}$  (600 MHz, Chloroform-*d*)  $\delta$  7.29 (t,  $J = 7.7$  Hz, 1H), 7.13 – 6.98 (m, 2H), 6.83 (d,  $J = 7.8$  Hz, 1H), 3.68 (s, 3H), 3.21 (s, 3H), 2.99 (p,  $J = 9.0$  Hz, 1H), 2.88 (d,  $J = 15.1$  Hz, 1H), 2.82 – 2.73 (m, 2H), 2.62 – 2.49 (m, 3H), 1.35 (s, 3H) ppm;  $^{13}\text{C NMR}$  (150 MHz, Chloroform-*d*)  $\delta$  178.8, 173.7, 143.1, 128.6, 123.7, 122.5, 108.2, 86.8, 52.1, 46.1, 44.6, 38.1, 34.3, 32.2, 26.3, 26.0 ppm; IR (film)  $\nu_{\text{max}}$  3017, 2963, 1736, 1566, 1435, 1358, 1204, 1080, 1011, 841, 741, 609  $\text{cm}^{-1}$ ; HRMS (ESI-TOF)  $m/z$ :  $[\text{M} + \text{H}]^+$  Calcd for  $\text{C}_{17}\text{H}_{21}\text{N}_2\text{O}_5$  333.1444; Found 333.1440.

Note: A single diastereomer was obtained. But the *cis*- or *trans*- configuration was not determined.

***tert*-Butyl 3-((1,3-dimethyl-2-oxoindolin-3-yl)methyl)-3-nitroazetidine-1-carboxylate (3ah)**

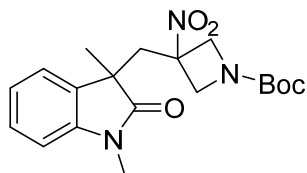

Yellow oil (73 mg, 65% yield);  $R_f = 0.1$  (5:1 hexanes/AcOEt);  $^1\text{H NMR}$  (600 MHz, Chloroform-*d*)  $\delta$  7.23 – 7.20 (m, 1H), 7.11 – 7.03 (m, 2H), 6.84 (d,  $J = 7.8$  Hz, 1H), 4.25 (d,  $J = 10.3$  Hz, 1H), 4.03 (dd,  $J = 10.2, 1.0$  Hz, 1H), 3.94 (dd,  $J = 10.2, 1.0$  Hz, 1H), 3.34 (d,  $J = 6.4$  Hz, 1H), 3.22 (s, 3H), 2.87 (d,  $J = 3.4$  Hz, 2H), 1.39 (s, 9H) ppm;  $^{13}\text{C NMR}$  (151 MHz, Chloroform-*d*)  $\delta$  178.3, 143.1, 129.4, 128.9, 126.5,

123.3, 122.7, 108.4, 88.2, 81.8, 60.4, 46.0, 42.3, 31.5, 28.2, 28.2, 26.3 ppm; IR (film)  $\nu_{max}$ , 1635, 1366, 1080, 741  $\text{cm}^{-1}$ .

**3-((2,2-Dimethyl-5-nitro-1,3-dioxan-5-yl)methyl)-1,3-dimethylindolin-2-one (3ai)**

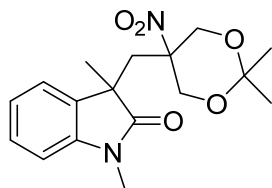

White solid (100 mg, 70% yield);  $R_f = 0.1$  (5:1 hexanes/AcOEt); m.p. 185.6–186.1 °C;  $^1\text{H NMR}$  (400 MHz, Chloroform-*d*)  $\delta$  7.32 (ddd,  $J = 7.8, 6.9, 2.0$  Hz, 1H), 7.13 – 7.03 (m, 2H), 6.87 (dt,  $J = 7.8, 0.9$  Hz, 1H), 4.10 (ddd,  $J = 13.5, 5.7, 2.7$  Hz, 2H), 3.90 – 3.68 (m, 2H), 3.24 (d,  $J = 2.4$  Hz, 3H), 2.48 (t,  $J = 1.3$  Hz, 2H), 1.37 – 1.29 (m, 6H), 1.22 (d,  $J = 2.2$  Hz, 3H) ppm;  $^{13}\text{C NMR}$  (100 MHz, Chloroform-*d*)  $\delta$  178.6, 142.6, 129.9, 128.9, 123.0, 122.9, 108.6, 98.7, 85.0, 65.6, 62.5, 45.5, 39.6, 27.6, 27.4, 26.4, 19.0 ppm; IR (film)  $\nu_{max}$  1604, 1366, 1103  $\text{cm}^{-1}$ ; HRMS (ESI-TOF)  $m/z$ :  $[\text{M} + \text{H}]^+$  Calcd for  $\text{C}_{17}\text{H}_{23}\text{N}_2\text{O}_5$  335.1601; Found 335.1603.

**1,3,5-Trimethyl-3-((1-nitrocyclobutyl)methyl)indolin-2-one (3bf)**

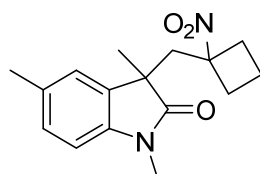

Yellow oil (45 mg, 40% yield);  $R_f = 0.3$  (10:1 hexanes/AcOEt);  $^1\text{H NMR}$  (400 MHz, Chloroform-*d*)  $\delta$  7.07 (t,  $J = 6.0$  Hz, 1H), 6.87 (d,  $J = 4.0$  Hz, 1H), 6.71 (t,  $J = 6.0$  Hz, 1H), 3.19 (d,  $J = 4.1$  Hz, 3H), 2.93 – 2.68 (m, 2H), 2.49 (t,  $J = 10.2$  Hz, 1H), 2.37 – 2.18 (m, 6H), 1.76 (t,  $J = 7.7$  Hz, 2H), 1.34 (d,  $J = 4.2$  Hz, 3H) ppm;  $^{13}\text{C NMR}$  (100 MHz, Chloroform-*d*)  $\delta$  179.3, 140.7, 132.1, 130.3, 128.6, 124.6, 107.8, 87.8, 46.3, 43.7, 36.3, 29.5, 26.3, 21.1, 14.1 ppm; IR (film)  $\nu_{max}$  2955, 2831, 1605, 1366, 1088, 764, 617  $\text{cm}^{-1}$ ; HRMS (ESI-TOF)  $m/z$ :  $[\text{M} + \text{H}]^+$  Calcd for  $\text{C}_{16}\text{H}_{21}\text{N}_2\text{O}_3$  289.1546; Found 289.1544.

**5-Methoxy-1,3-dimethyl-3-((1-nitrocyclobutyl)methyl)indolin-2-one (3cf)**

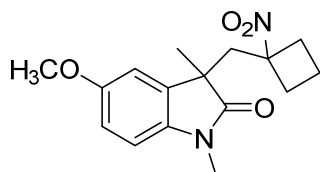

Yellow oil (46 mg, 36% yield);  $R_f = 0.1$  (10:1 hexanes/AcOEt);  $^1\text{H NMR}$  (600 MHz, Chloroform-*d*)  $\delta$  6.81 (dtd,  $J = 7.8, 3.5, 1.8$  Hz, 1H), 6.73 (ddd,  $J = 8.5, 3.4, 1.7$  Hz, 1H), 6.68 (dt,  $J = 4.1, 2.0$  Hz, 1H),

3.78 (d,  $J = 1.7$  Hz, 3H), 3.19 (d,  $J = 1.7$  Hz, 3H), 2.94 – 2.71 (m, 2H), 2.58 – 2.46 (m, 1H), 2.38 – 2.18 (m, 3H), 1.79 – 1.76 (m, 2H), 1.35 (d,  $J = 1.7$  Hz, 3H) ppm;  $^{13}\text{C}$  NMR (150 MHz, Chloroform- $d$ )  $\delta$  179.0, 156.0, 136.5, 131.4, 113.2, 110.9, 108.5, 87.7, 55.9, 46.7, 43.6, 36.4, 29.3, 26.3, 26.3, 14.1 ppm; IR (film)  $\nu_{\text{max}}$  1612, 1366, 1103, 756  $\text{cm}^{-1}$ ; HRMS (ESI-TOF)  $m/z$ :  $[\text{M} + \text{H}]^+$  Calcd for  $\text{C}_{16}\text{H}_{21}\text{N}_2\text{O}_4$  305.1495; Found 305.1494.

**1,3-Dimethyl-3-((1-nitrocyclobutyl)methyl)-5-(trifluoromethyl)indolin-2-one (3df)**

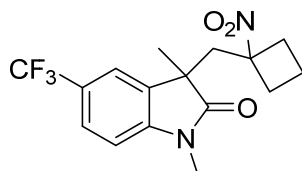

White solid (40 mg, 33% yield);  $R_f = 0.2$  (10:1 hexanes/AcOEt); m.p. 134.1–134.6  $^{\circ}\text{C}$ ;  $^1\text{H}$  NMR (600 MHz, Chloroform- $d$ )  $\delta$  7.57 (t,  $J = 7.3$  Hz, 1H), 7.31 (d,  $J = 6.5$  Hz, 1H), 6.89 (t,  $J = 7.8$  Hz, 1H), 3.37 – 3.14 (m, 2H), 2.58 – 2.49 (m, 1H), 2.39 – 2.30 (m, 1H), 2.29 – 2.18 (m, 1H), 1.78 (dddd,  $J = 15.7, 9.3, 4.9, 1.9$  Hz, 1H), 1.39 (q,  $J = 5.4, 4.4$  Hz, 2H) ppm;  $^{13}\text{C}$  NMR (151 MHz, Chloroform- $d$ )  $\delta$  179.1, 146.1, 130.9, 126.2 (d,  $J = 4.2$  Hz), 125.5 – 124.2 (m), 120.8 (d,  $J = 3.7$  Hz), 107.9, 87.5, 46.2, 43.6, 36.0, 30.1, 26.5, 26.2, 14.0 ppm;  $^{19}\text{F}$  NMR (565 MHz, Chloroform- $d$ )  $\delta$  61.2 ppm; IR (film)  $\nu_{\text{max}}$  1605, 1373, 1103, 764  $\text{cm}^{-1}$ ; HRMS (ESI-TOF)  $m/z$ :  $[\text{M} + \text{H}]^+$  Calcd for  $\text{C}_{16}\text{H}_{18}\text{N}_2\text{O}_3\text{F}_3$  343.1264; Found 343.1265.

**1,3-Dimethyl-3-((1-nitrocyclobutyl)methyl)-2-oxoindoline-5-carbonitrile (3ef)**

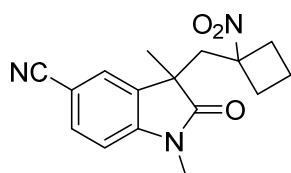

White solid (68 mg, 61% yield);  $R_f = 0.1$  (10:1 hexanes/AcOEt); m.p. 139.7–140.9  $^{\circ}\text{C}$ ;  $^1\text{H}$  NMR (400 MHz, Chloroform- $d$ )  $\delta$  7.71 – 7.56 (m, 1H), 7.33 – 7.30 (m, 1H), 6.88 (d,  $J = 8.2$  Hz, 1H), 3.24 (s, 3H), 2.85 – 2.71 (m, 2H), 2.59 – 2.48 (m, 1H), 2.42 – 2.17 (m, 3H), 1.79 (h,  $J = 7.6, 6.9$  Hz, 2H), 1.37 (s, 3H) ppm;  $^{13}\text{C}$  NMR (100 MHz, Chloroform- $d$ )  $\delta$  178.7, 147.0, 133.8, 131.3, 126.9, 119.0, 108.6, 105.7, 87.3, 46.1, 43.5, 36.0, 30.0, 26.5, 26.2, 14.0 ppm; IR (film)  $\nu_{\text{max}}$  2831, 1605, 1366, 1080, 756  $\text{cm}^{-1}$ ; HRMS (ESI-TOF)  $m/z$ :  $[\text{M} + \text{H}]^+$  Calcd for  $\text{C}_{16}\text{H}_{18}\text{N}_3\text{O}_3$  300.1342; Found 300.1339.

**Methyl 1,3-dimethyl-3-((1-nitrocyclobutyl)methyl)-2-oxoindoline-5-carboxylate (3ff)**

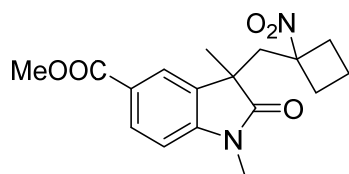

White solid (61 mg, 55% yield);  $R_f = 0.1$  (10:1 hexanes/AcOEt); m.p. 132.1–132.8 °C;  $^1\text{H NMR}$  (400 MHz, Chloroform-*d*)  $\delta$  8.03 (dd,  $J = 8.1, 1.6$  Hz, 1H), 7.76 (d,  $J = 1.7$  Hz, 1H), 6.85 (d,  $J = 8.2$  Hz, 1H), 3.89 (s, 3H), 3.23 (s, 3H), 2.79 (q,  $J = 15.1$  Hz, 2H), 2.52 (ddt,  $J = 11.0, 8.5, 4.2$  Hz, 1H), 2.38–2.08 (m, 3H), 1.75 (p,  $J = 9.5, 8.7$  Hz, 2H), 1.37 (s, 3H) ppm;  $^{13}\text{C NMR}$  (100 MHz, Chloroform-*d*)  $\delta$  179.3, 166.7, 147.2, 131.2, 130.3, 124.8, 124.4, 107.7, 87.5, 52.0, 46.1, 43.6, 35.7, 30.5, 26.4, 26.3, 14.0 ppm; IR (film)  $\nu_{\text{max}}$  1589, 1373, 1088, 779  $\text{cm}^{-1}$ ; HRMS (ESI-TOF)  $m/z$ :  $[\text{M} + \text{H}]^+$  Calcd for  $\text{C}_{17}\text{H}_{21}\text{N}_2\text{O}_5$  333.1444; Found 333.1452.

### 5-Fluoro-1,3-dimethyl-3-((1-nitrocyclobutyl)methyl)indolin-2-one (3gf)

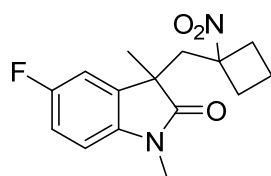

White solid (59 mg, 55% yield);  $R_f = 0.2$  (10:1 hexanes/AcOEt); m.p. 122.6–123.7 °C;  $^1\text{H NMR}$  (600 MHz, Chloroform-*d*)  $\delta$  6.98 (td,  $J = 8.8, 2.6$  Hz, 1H), 6.81 (dd,  $J = 7.9, 2.6$  Hz, 1H), 6.73 (dd,  $J = 8.5, 4.1$  Hz, 1H), 3.20 (s, 3H), 2.88–2.71 (m, 2H), 2.57–2.49 (m, 1H), 2.39–2.31 (m, 1H), 2.24 (dddd,  $J = 11.9, 8.5, 6.9, 2.0$  Hz, 2H), 1.77 (dddd,  $J = 16.1, 8.3, 6.9, 2.8$  Hz, 2H), 1.35 (s, 3H) ppm;  $^{13}\text{C NMR}$  (150 MHz, Chloroform-*d*)  $\delta$  178.9, 160.0, 158.4, 139.0, 131.9, 131.9, 114.8, 114.7, 111.9, 111.8, 108.6, 108.6, 87.6, 46.8, 43.6, 36.3, 29.6, 26.4, 26.2, 14.1 ppm; IR (film)  $\nu_{\text{max}}$  1597, 1381, 1088, 772  $\text{cm}^{-1}$ ; HRMS (ESI-TOF)  $m/z$ :  $[\text{M} + \text{H}]^+$  Calcd for  $\text{C}_{15}\text{H}_{17}\text{N}_2\text{O}_3\text{F}$  293.1295; Found 293.1298.

### 3-((2,2-Dimethyl-5-nitro-1,3-dioxan-5-yl)methyl)-5-fluoro-1,3-dimethylindolin-2-one (3gi)

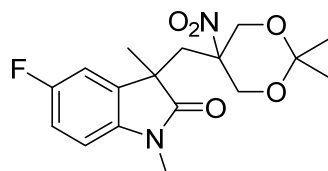

White solid (90 mg, 55% yield);  $R_f = 0.2$  (10:1 hexanes/AcOEt); m.p. 145.3–146.7 °C;  $^1\text{H NMR}$  (400 MHz, Chloroform-*d*)  $\delta$  7.09–6.97 (m, 1H), 6.88–6.75 (m, 2H), 4.19–4.03 (m, 2H), 3.93–3.68 (m, 2H), 3.23 (d,  $J = 0.8$  Hz, 3H), 2.54–2.38 (m, 2H), 1.35 (s, 3H), 1.32 (s, 3H), 1.23 (s, 3H) ppm;  $^{13}\text{C NMR}$  (100 MHz, Chloroform-*d*)  $\delta$  178.2, 160.5, 158.1, 138.6, 131.6, 131.5, 115.3, 115.1, 111.3, 111.1, 109.2,

109.1, 98.8, 84.7, 65.5, 62.6, 46.0, 39.4, 27.6, 27.2, 26.5, 19.1 ppm; IR (film)  $\nu_{max}$  2963, 1597, 1366, 1103, 733, 571  $\text{cm}^{-1}$ ; HRMS (ESI-TOF)  $m/z$ :  $[\text{M} + \text{H}]^+$  Calcd for  $\text{C}_{17}\text{H}_{22}\text{N}_2\text{O}_3\text{F}$  353.1507; Found 353.1508.

**5-Chloro-1,3-dimethyl-3-((1-nitrocyclobutyl)methyl)indolin-2-one (3hf)**

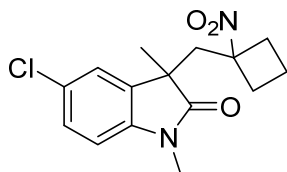

White solid (92 mg, 73% yield);  $R_f = 0.2$  (10:1 hexanes/AcOEt); m.p. 129.6–130.7 °C;  $^1\text{H}$  NMR (600 MHz, Chloroform-*d*)  $\delta$  7.24 (dd,  $J = 8.4, 2.0$  Hz, 1H), 7.03 (d,  $J = 2.2$  Hz, 1H), 6.73 (d,  $J = 8.3$  Hz, 1H), 3.18 (s, 3H), 2.89 – 2.70 (m, 2H), 2.52 (dt,  $J = 16.0, 8.8$  Hz, 1H), 2.39 – 2.30 (m, 1H), 2.29 – 2.13 (m, 2H), 1.80 – 1.73 (m, 2H), 1.34 (s, 3H) ppm;  $^{13}\text{C}$  NMR (150 MHz, Chloroform-*d*)  $\delta$  178.6, 141.6, 132.0, 128.3, 127.9, 124.1, 109.0, 87.5, 46.5, 43.6, 36.0, 29.9, 26.3, 26.2, 14.0 ppm; IR (film)  $\nu_{max}$  3387, 1613, 1374, 1088, 772  $\text{cm}^{-1}$ ; HRMS (ESI-TOF)  $m/z$ :  $[\text{M} + \text{H}]^+$  Calcd for  $\text{C}_{15}\text{H}_{17}\text{N}_2\text{O}_3\text{Cl}$  309,1000; Found 309.1005.

**5-Bromo-1,3-dimethyl-3-((1-nitrocyclobutyl)methyl)indolin-2-one (3if)**

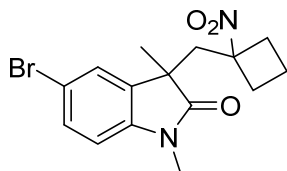

White solid (104 mg, 78% yield);  $R_f = 0.2$  (10:1 hexanes/AcOEt); m.p. 154.2–155.4 °C;  $^1\text{H}$  NMR (600 MHz, Chloroform-*d*)  $\delta$  7.37 (dd,  $J = 8.2, 2.0$  Hz, 1H), 7.16 (d,  $J = 2.1$  Hz, 1H), 6.68 (d,  $J = 8.3$  Hz, 1H), 3.17 (s, 3H), 2.75 (q,  $J = 15.2$  Hz, 2H), 2.57 – 2.46 (m, 1H), 2.38 – 2.29 (m, 1H), 2.22 (dq,  $J = 19.0, 10.9, 9.8$  Hz, 2H), 1.75 (ddtd,  $J = 14.5, 11.0, 8.4, 4.1$  Hz, 2H), 1.33 (s, 3H) ppm;  $^{13}\text{C}$  NMR (150 MHz, Chloroform-*d*)  $\delta$  178.4, 142.1, 132.4, 131.2, 126.8, 115.1, 109.5, 87.5, 46.4, 43.5, 35.9, 30.0, 26.3, 26.1, 14.0 ppm; IR (film)  $\nu_{max}$  2955, 1697, 1612, 1358, 1103, 741  $\text{cm}^{-1}$ ; HRMS (ESI-TOF)  $m/z$ :  $[\text{M} + \text{H}]^+$  Calcd for  $\text{C}_{15}\text{H}_{18}\text{N}_2\text{O}_3\text{Br}$  353.0495; Found 353.0492.

**1,3,6-Trimethyl-3-((1-nitrocyclobutyl)methyl)indolin-2-one and 1,3,4-trimethyl-3-((1-nitrocyclobutyl)methyl)indolin-2-one (3jf)**

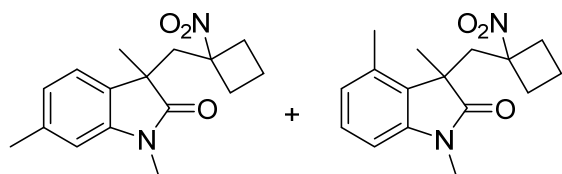

Yellow oil (41mg, 38% total yield);  $R_f = 0.3$  (10:1 hexanes/AcOEt);  $^1\text{H NMR}$  (400 MHz, Chloroform-*d*)  $\delta$  7.22 – 6.90 (m, 1H), 6.81 (dd,  $J = 16.7, 7.7$  Hz, 1H), 6.71 – 6.63 (m, 1H), 3.19 (s, 3H), 3.07 – 2.63 (m, 2H), 2.56 – 2.45 (m, 1H), 2.34 (d,  $J = 26.1$  Hz, 6H), 1.82 – 1.70 (m, 2H), 1.35 – 1.21 (m, 3H) ppm;  $^{13}\text{C NMR}$  (100 MHz, Chloroform-*d*)  $\delta$  179.7, 179.0, 143.5, 143.1, 138.6, 135.2, 128.4, 127.5, 127.1, 125.2, 123.4, 123.1, 109.1, 105.8, 88.0, 87.8, 46.8, 46.1, 43.7, 42.6, 36.4, 29.7, 29.5, 29.3, 26.3, 26.3, 26.2, 23.6, 21.8, 18.3, 14.3, 14.1 ppm; IR (film)  $\nu_{\text{max}}$  1598, 1373, 1088, 771  $\text{cm}^{-1}$ ; HRMS (ESI-TOF)  $m/z$ :  $[\text{M} + \text{H}]^+$  Calcd for  $\text{C}_{16}\text{H}_{21}\text{N}_2\text{O}_3$  289.1546; Found 289.1544.

**6-Methoxy-1,3-dimethyl-3-((1-nitrocyclobutyl)methyl)indolin-2-one and 4-methoxy-1,3-dimethyl-3-((1-nitrocyclobutyl)methyl)indolin-2-one (3kf)**

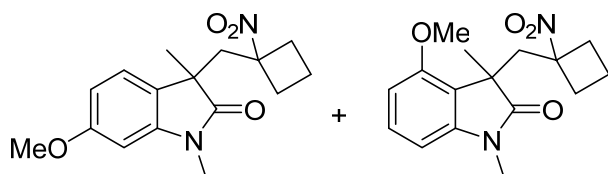

Yellow oil (34 mg, 31% total yield);  $R_f = 0.2$  (10:1 hexanes/AcOEt);  $^1\text{H NMR}$  (400 MHz, Chloroform-*d*)  $\delta$  7.26 – 7.23 (m, 1H), 6.53 (dd,  $J = 25.8, 8.1$  Hz, 2H), 3.84 (d,  $J = 0.9$  Hz, 3H), 3.19 (d,  $J = 0.9$  Hz, 3H), 3.10 (d,  $J = 14.9$  Hz, 1H), 2.64 (d,  $J = 15.0$  Hz, 1H), 2.56 – 2.44 (m, 1H), 2.25 (dddd,  $J = 21.9, 19.8, 12.7, 7.6, 2.3$  Hz, 3H), 1.77 – 1.70 (m, 2H), 1.41 (d,  $J = 0.9$  Hz, 3H) ppm;  $^{13}\text{C NMR}$  (100 MHz, Chloroform-*d*)  $\delta$  179.4, 156.4, 144.3, 130.5, 129.8, 128.9, 127.8, 105.5, 101.5, 88.0, 55.1, 46.3, 42.0, 35.6, 30.5, 29.7, 26.4, 23.7, 20.1, 14.0 ppm; IR (film)  $\nu_{\text{max}}$  1598, 1373, 1088, 772  $\text{cm}^{-1}$ ; HRMS (ESI-TOF)  $m/z$ :  $[\text{M} + \text{H}]^+$  Calcd for  $\text{C}_{16}\text{H}_{21}\text{N}_2\text{O}_4$  305.1495; Found 305.1502.

**6-Chloro-1,3-dimethyl-3-((1-nitrocyclobutyl)methyl)indolin-2-one and 4-Chloro-1,3-dimethyl-3-((1-nitrocyclobutyl)methyl)indolin-2-one (3lf)**

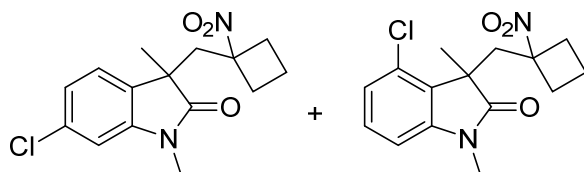

Yellow oil (35 mg, 38% total yield);  $R_f = 0.2$  (10:1 hexanes/AcOEt);  $^1\text{H NMR}$  (600 MHz, Chloroform-*d*)  $\delta$  7.19 (t,  $J = 7.8$  Hz, 1.73H), 6.92 (d,  $J = 7.5$  Hz, 1H), 6.83 (s, 1H), 6.78 (d,  $J = 7.8$  Hz, 1.67H), 6.72

– 6.62 (m, 2.63H), 3.19 (s, 8.11H), 3.03 (d,  $J = 15.2$  Hz, 1.74H), 2.87 (d,  $J = 15.2$  Hz, 1H), 2.73 (d,  $J = 15.2$  Hz, 1H), 2.67 (d,  $J = 15.1$  Hz, 1.78H), 2.51 (t,  $J = 10.1$  Hz, 2.89H), 2.31 (s, 7.88H), 2.24 (d,  $J = 9.8$  Hz, 3.87H), 1.76 (q,  $J = 7.8, 7.1$  Hz, 5.71H), 1.44 (s, 5.81H) ppm;  $^{13}\text{C}$  NMR (100 MHz, Chloroform-*d*)  $\delta$  179.7, 179.0, 143.5, 143.1, 138.6, 135.2, 128.4, 127.5, 127.1, 125.2, 123.4, 123.1, 109.1, 105.8, 88.0, 87.7, 46.8, 46.1, 43.7, 42.6, 36.4, 29.7, 29.5, 29.3, 26.4, 26.3, 26.2, 23.5, 21.8, 18.3, 14.3, 14.1 ppm; R (film)  $\nu_{\text{max}}$  3387, 1613, 1374, 1088, 772  $\text{cm}^{-1}$ ; HRMS (ESI-TOF)  $m/z$ :  $[\text{M} + \text{H}]^+$  Calcd for  $\text{C}_{15}\text{H}_{17}\text{N}_2\text{O}_3\text{Cl}$  309,1000; Found 309.1005.

### 1,3,7-Trimethyl-3-((1-nitrocyclobutyl)methyl)indolin-2-one (3mf)

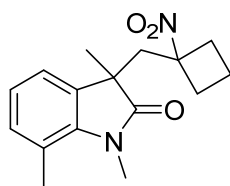

Yellow oil (54 mg, 60% yield);  $R_f = 0.3$  (10:1 hexanes/AcOEt);  $^1\text{H}$  NMR (600 MHz, Chloroform-*d*)  $\delta$  7.19 (dd,  $J = 6.8, 2.6$  Hz, 1H), 7.00 – 6.87 (m, 2H), 3.59 (s, 3H), 2.84 (dd,  $J = 15.2, 1.1$  Hz, 1H), 2.74 (d,  $J = 15.2$  Hz, 1H), 2.60 – 2.50 (m, 1H), 2.40 – 2.33 (m, 1H), 2.29 – 2.18 (m, 2H), 1.84 – 1.74 (m, 2H), 1.34 (s, 3H), 1.27 – 1.24 (m, 3H) ppm;  $^{13}\text{C}$  NMR (101 MHz, Chloroform-*d*)  $\delta$  179.6, 139.0, 133.0, 130.8, 123.2, 122.1, 115.6, 87.6, 46.1, 43.9, 36.5, 29.7, 29.3, 26.6, 14.1 ppm; IR (film)  $\nu_{\text{max}}$  1605, 1366, 1088, 764  $\text{cm}^{-1}$ ; HRMS (ESI-TOF)  $m/z$ :  $[\text{M} + \text{H}]^+$  Calcd for  $\text{C}_{16}\text{H}_{21}\text{N}_2\text{O}_3$  289.1546; Found 289.1544.

### 7-Chloro-1,3-dimethyl-3-((1-nitrocyclobutyl)methyl)indolin-2-one (3nf)

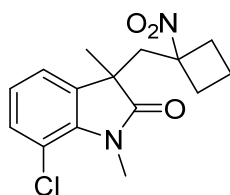

Yellow oil (51 mg, 62% yield);  $R_f = 0.3$  (10:1 hexanes/AcOEt);  $^1\text{H}$  NMR (400 MHz, Chloroform-*d*)  $\delta$  7.19 (dd,  $J = 6.4, 3.0$  Hz, 1H), 6.95 – 6.88 (m, 2H), 3.58 (s, 3H), 2.84 (dd,  $J = 15.2, 1.1$  Hz, 1H), 2.74 (d,  $J = 15.2$  Hz, 1H), 2.61 – 2.50 (m, 1H), 2.43 – 2.32 (m, 1H), 2.29 – 2.17 (m, 2H), 1.84 – 1.72 (m, 2H), 1.34 (s, 3H) ppm;  $^{13}\text{C}$  NMR (101 MHz, Chloroform-*d*)  $\delta$  179.5, 139.0, 132.9, 130.7, 123.3, 122.1, 115.5, 87.6, 46.1, 43.8, 36.5, 29.7, 29.6, 29.3, 26.6, 14.1 ppm; IR (film)  $\nu_{\text{max}}$  1720, 1535, 1466, 741  $\text{cm}^{-1}$ ; HRMS (ESI-TOF)  $m/z$ :  $[\text{M} + \text{H}]^+$  Calcd for  $\text{C}_{15}\text{H}_{17}\text{N}_2\text{O}_3\text{Cl}$  309,1000; Found 309.0997.

### 1-Methyl-1-((1-nitrocyclobutyl)methyl)-5,6-dihydro-4H-pyrrolo[3,2,1-*ij*]quinolin-2(1H)-one (3of)

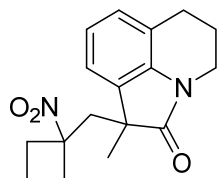

Yellow oil (64 mg, 43% yield);  $R_f = 0.1$  (10:1 hexanes/AcOEt);  $^1\text{H NMR}$  (600 MHz, Chloroform-*d*)  $\delta$  7.03 – 6.99 (m, 1H), 6.92 – 6.87 (m, 2H), 3.75 – 3.64 (m, 2H), 2.87 (dd,  $J = 15.2, 1.1$  Hz, 1H), 2.81 (dt,  $J = 16.3, 6.0$  Hz, 1H), 2.76 – 2.71 (m, 2H), 2.54 (dtt,  $J = 12.2, 8.1, 1.4$  Hz, 1H), 2.38 – 2.21 (m, 3H), 2.00 (p,  $J = 6.0$  Hz, 2H), 1.83 – 1.71 (m, 2H), 1.35 (s, 3H) ppm;  $^{13}\text{C NMR}$  (150 MHz, Chloroform-*d*)  $\delta$  178.1, 138.9, 128.7, 127.1, 121.9, 121.6, 120.1, 87.8, 77.2, 77.0, 76.8, 47.6, 43.7, 39.0, 36.3, 29.5, 25.9, 24.5, 21.1, 14.1 ppm; IR (film)  $\nu_{\text{max}}$  2940, 1705, 1605, 1612, 1450, 1366, 1080, 756  $\text{cm}^{-1}$ ; HRMS (ESI-TOF)  $m/z$ :  $[\text{M} + \text{H}]^+$  Calcd for  $\text{C}_{17}\text{H}_{21}\text{N}_2\text{O}_3$  301.1546; Found 301.1542.

### 3-Methyl-3-((1-nitrocyclobutyl)methyl)-1-phenylindolin-2-one (3pf)

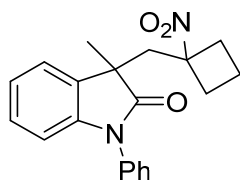

Yellow oil (66 mg, 45% yield);  $R_f = 0.2$  (10:1 hexanes/AcOEt);  $^1\text{H NMR}$  (400 MHz, Chloroform-*d*)  $\delta$  7.64 – 7.39 (m, 5H), 7.23 – 6.98 (m, 3H), 6.78 (d,  $J = 7.9$  Hz, 1H), 3.00 – 2.81 (m, 2H), 2.73 – 2.63 (m, 1H), 2.48 – 2.26 (m, 3H), 1.85 – 1.74 (m, 2H), 1.49 (d,  $J = 1.2$  Hz, 3H) ppm;  $^{13}\text{C NMR}$  (100 MHz, Chloroform-*d*)  $\delta$  178.7, 143.0, 134.3, 129.8, 129.6, 128.3, 128.1, 126.3, 123.9, 122.9, 109.4, 87.7, 46.4, 43.8, 36.6, 29.5, 26.9, 14.0 ppm; IR (film)  $\nu_{\text{max}}$  1605, 1366, 1080, 771, 610, 555  $\text{cm}^{-1}$ ; HRMS (ESI-TOF)  $m/z$ :  $[\text{M} + \text{H}]^+$  Calcd for  $\text{C}_{20}\text{H}_{21}\text{N}_2\text{O}_3$  337.1546; Found 337.1543.

### 7-Methyl-7-((1-nitrocyclobutyl)methyl)-11,12-dihydrobenzo[6,7]azepino[3,2,1-*hi*]indol-6(7H)-one (3qf)

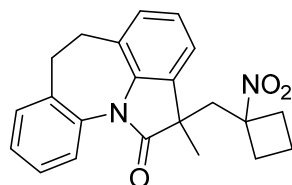

White solid (124 mg, 93% yield);  $R_f = 0.3$  (10:1 hexanes/AcOEt); m.p. 134.4 – 134.7  $^{\circ}\text{C}$ ;  $^1\text{H NMR}$  (400 MHz, Chloroform-*d*)  $\delta$  7.84 (d,  $J = 8.2$  Hz, 1H), 7.32 – 7.16 (m, 3H), 7.06 – 6.90 (m, 3H), 3.16 – 2.83 (m, 6H), 2.69 – 2.55 (m, 1H), 2.43 – 2.26 (m, 3H), 1.77 (p,  $J = 7.8$  Hz, 2H), 1.48 (s, 3H) ppm;  $^{13}\text{C NMR}$  (100 MHz, Chloroform-*d*)  $\delta$  179.6, 140.1, 136.8, 135.7, 130.3, 130.2, 129.5, 126.5, 126.4, 126.2, 124.9,



122.2, 121.4, 87.6, 46.2, 43.9, 36.6, 33.9, 33.7, 27.6, 14.0 ppm; IR (film)  $\nu_{max}$  1605, 1373, 1103  $\text{cm}^{-1}$ ;  
HRMS (ESI-TOF)  $m/z$ :  $[M + H]^+$  Calcd for  $\text{C}_{22}\text{H}_{23}\text{N}_2\text{O}_3$  363.1703; Found 363.1705.

**(1-Methyl-3-((1-nitrocyclobutyl)methyl)-2-oxindolin-3-yl)methyl acetate (3rf)**

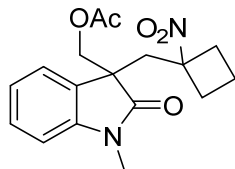

Yellow oil (42 mg, 30% yield);  $R_f = 0.1$  (10:1 hexanes/AcOEt);  $^1\text{H NMR}$  (400 MHz, Chloroform-*d*)  $\delta$  7.32 (t,  $J = 7.8$  Hz, 1H), 7.13 – 6.97 (m, 2H), 6.83 (d,  $J = 7.8$  Hz, 1H), 4.22 (ddd,  $J = 150.8, 10.7, 1.7$  Hz, 2H), 3.23 (d,  $J = 1.7$  Hz, 3H), 3.09 – 2.69 (m, 2H), 2.61 – 2.45 (m, 1H), 2.27 (dtd,  $J = 28.5, 16.0, 14.3, 7.6$  Hz, 3H), 1.91 (d,  $J = 1.7$  Hz, 3H), 1.84 – 1.76 (m, 2H), 1.25 (s, 3H) ppm;  $^{13}\text{C NMR}$  (150 MHz, Chloroform-*d*)  $\delta$  176.1, 170.2, 143.9, 129.2, 125.8, 124.8, 122.6, 108.2, 87.4, 77.2, 77.0, 76.8, 67.9, 50.2, 39.1, 36.5, 29.6, 29.5, 26.4, 20.5, 14.2 ppm; IR (film)  $\nu_{max}$  2831, 1605, 1366, 1088, 756  $\text{cm}^{-1}$ ; HRMS (ESI-TOF)  $m/z$ :  $[M + H]^+$  Calcd for  $\text{C}_{17}\text{H}_{21}\text{N}_2\text{O}_5$  333.1444; Found 333.1441.

**1-Methyl-3-((1-nitrocyclobutyl)methyl)-3-(trifluoromethyl)indolin-2-one (3sf)**

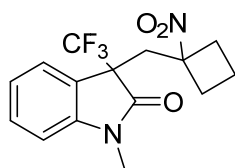

Yellow oil (54 mg, 50% yield);  $R_f = 0.1$  (10:1 hexanes/AcOEt);  $^1\text{H NMR}$  (600 MHz, Chloroform-*d*)  $\delta$  7.41 (tt,  $J = 7.8, 1.3$  Hz, 1H), 7.23 – 7.20 (m, 1H), 7.08 (tt,  $J = 7.6, 1.2$  Hz, 1H), 6.86 (d,  $J = 7.9$  Hz, 1H), 3.30 – 3.26 (m, 1H), 3.25 (d,  $J = 1.3$  Hz, 3H), 3.07 (dd,  $J = 15.1, 1.3$  Hz, 1H), 2.58 – 2.50 (m, 1H), 2.41 – 2.30 (m, 2H), 2.29 – 2.21 (m, 1H), 1.85 (dtdd,  $J = 12.8, 7.4, 3.8, 2.1$  Hz, 2H) ppm;  $^{13}\text{C NMR}$  (100 MHz, Chloroform-*d*)  $\delta$  163.6, 143.3, 134.0 (q,  $J = 31.8$  Hz), 129.4, 127.6, 126.6, 125.5, 121.3 (q,  $J = 273.7$  Hz), 37.5 ppm;  $^{19}\text{F NMR}$  (565 MHz, Chloroform-*d*)  $\delta$  -73.8 ppm; IR (film)  $\nu_{max}$  1612, 1366, 1157, 764  $\text{cm}^{-1}$ ; HRMS (ESI-TOF)  $m/z$ :  $[M + \text{Na}]^+$  Calcd for  $\text{C}_{15}\text{H}_{15}\text{N}_2\text{O}_3\text{F}_3\text{Na}$  351.0927; Found 351.0926.

**1-Methyl-3-((1-nitrocyclobutyl)methyl)-3-phenylindolin-2-one (3tf)**

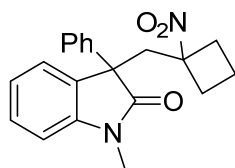

White solid (24 mg, 26% yield);  $R_f = 0.1$  (10:1 hexanes/AcOEt); m.p. 160.6–161.3 °C;  $^1\text{H NMR}$  (400 MHz, Chloroform-*d*)  $\delta$  7.39 – 7.21 (m, 6H), 7.16 – 7.04 (m, 2H), 6.88 (d,  $J = 7.8$  Hz, 1H), 3.31 (dt,  $J = 16.1, 15.1$  Hz, 2H), 3.22 (d,  $J = 1.0$  Hz, 3H), 2.61 – 2.49 (m, 1H), 2.43 – 2.26 (m, 3H), 1.89 – 1.76 (m, 2H) ppm;  $^{13}\text{C NMR}$  (100 MHz, Chloroform-*d*)  $\delta$  177.4, 143.8, 140.2, 129.0, 128.7, 128.1, 127.6, 126.4, 126.4, 122.6, 108.4, 88.1, 54.1, 43.9, 37.0, 29.3, 26.5, 14.5 ppm; IR (film)  $\nu_{\text{max}}$  1713, 1614, 1538, 1493, 1467, 1346, 750, 693  $\text{cm}^{-1}$ ; HRMS (ESI-TOF)  $m/z$ :  $[\text{M} + \text{H}]^+$  Calcd for  $\text{C}_{20}\text{H}_{21}\text{N}_2\text{O}_3$  337.1546; Found 337.1543.

**(*Z*)-*N*-Methyl-3-(1-nitrocyclobutyl)-*N*,2-diphenylacrylamide and (*E*)-*N*-methyl-3-(1-nitrocyclobutyl)-*N*,2-diphenylacrylamide (3tf'')**

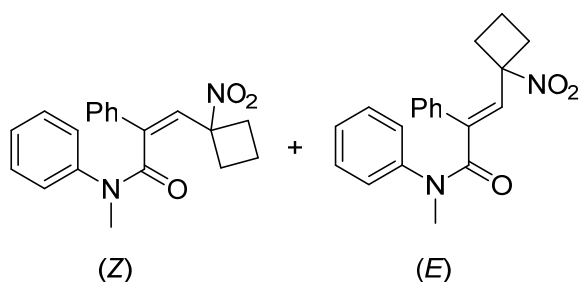

Yellow oil (88 mg, 82% total yield);  $R_f = 0.2$  (10:1 hexanes/AcOEt);  $^1\text{H NMR}$  (400 MHz, Chloroform-*d*)  $\delta$  7.59 – 7.30 (m, 5H), 7.23 – 6.97 (m, 9H), 6.76 (d,  $J = 7.2$  Hz, 2H), 6.31 (s, 0.41H), 5.90 (s, 1H), 3.34 (s, 3H), 3.08 (s, 1.38H), 3.02 – 2.73 (m, 6.36H), 2.22 – 1.96 (m, 3H) ppm;  $^{13}\text{C NMR}$  (100 MHz, Chloroform-*d*)  $\delta$  167.6, 142.2, 142.1, 141.9, 141.6, 137.4, 135.0, 129.3, 129.2, 129.1, 128.7, 128.3, 128.2, 127.9, 127.3, 127.1, 126.6, 126.1, 125.9, 125.7, 125.3, 89.1, 88.5, 38.7, 37.0, 33.9, 14.9, 14.6 ppm; IR (film)  $\nu_{\text{max}}$  1647, 1597, 1540, 1495, 1384, 1126, 766, 698  $\text{cm}^{-1}$ ; HRMS (ESI-TOF)  $m/z$ :  $[\text{M} + \text{H}]^+$  Calcd for  $\text{C}_{20}\text{H}_{21}\text{N}_2\text{O}_3$  337.1546; Found 337.1542.

***trans*-1-Methyl-3-(1-nitrocyclobutyl)-4-phenyl-3,4-dihydroquinolin-2(1*H*)-one (3uf)**

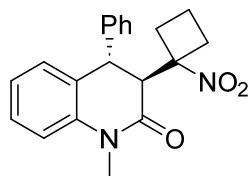

White solid (62 mg, 58% yield);  $R_f = 0.1$  (10:1 hexanes/AcOEt); m.p. 86.1–86.9 °C;  $^1\text{H NMR}$  (600 MHz, Chloroform-*d*)  $\delta$  7.34 (ddd,  $J = 8.0, 6.6, 2.5$  Hz, 1H), 7.28 – 7.23 (m, 2H), 7.21 – 7.18 (m, 1H), 7.09 – 7.03 (m, 3H), 6.99 – 6.94 (m, 2H), 4.10 (d,  $J = 2.1$  Hz, 1H), 3.53 (d,  $J = 2.1$  Hz, 1H), 3.44 (s, 3H), 2.69 (dd,  $J = 8.5, 7.5$  Hz, 2H), 2.61 – 2.51 (m, 1H), 2.42 (ddt,  $J = 9.6, 8.2, 5.9$  Hz, 1H), 1.98 – 1.84 (m, 1H), 1.81 – 1.67 (m, 1H) ppm;  $^{13}\text{C NMR}$  (100 MHz, Chloroform-*d*)  $\delta$  165.8, 141.4, 139.4, 129.6, 129.0, 128.7,

127.3, 127.0, 124.6, 124.0, 114.7, 90.9, 53.8, 43.2, 32.7, 30.9, 30.0, 14.2 ppm; IR (film)  $\nu_{max}$  1628, 1366, 1134, 786  $\text{cm}^{-1}$ ; HRMS (ESI-TOF)  $m/z$ :  $[\text{M} + \text{H}]^+$  Calcd for  $\text{C}_{20}\text{H}_{21}\text{N}_2\text{O}_3$  337.1546; Found 337.1541.

## 5. Gram-scale reaction

A dry Schlenk tube charged with a stirring bar was evacuated and backfilled with N<sub>2</sub> (three times). *N*-Methyl-*N*-phenylmethacrylamide (**1a**, 1.6 g, 9.0 mmol), 1-bromo-1-nitrocyclobutane (**2f**, 3.0 mL, 18 mmol), Ag<sub>2</sub>CO<sub>3</sub> (12.5 g, 18.0 mmol) and anhydrous acetone (50 mL) were added under N<sub>2</sub> atmosphere followed by *fac*-Ir(ppy)<sub>3</sub> (20 mg, 1.0 mol%). The reaction mixture was degassed by freeze-pump-thaw method and then stirred under irradiation with blue LEDs (456 nm, approximately 3.0 cm distance from the tube). The mixture was maintained at approximately 25 °C by a desk fan in air-conditioned room. The reaction was monitored by TLC. Upon completion (24 h), the mixture was concentrated in vacuo. The crude product was purified by flash chromatography on silica gel (10:1 hexanes/AcOEt) to give **3af** (light yellow oil, 1.72 g, 71% yield).

## 6. Conversions of **3af**

### 6.1 Conversions of **3af**<sup>23,24</sup>

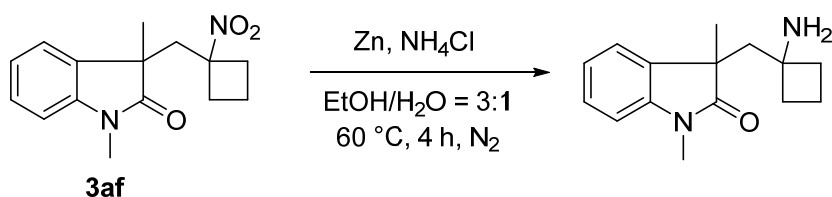

Zn dust was stirred with 1 M HCl (10.0 mL) for 5 minutes, filtered and washed with H<sub>2</sub>O. **3af** (137 mg, 0.5 mmol), NH<sub>4</sub>Cl (294 mg, 5.5 mmol, 11 equiv) and activated Zn dust (325 mg, 5.0 mmol, 10.0 equiv) were added to a mixture of EtOH and water (3:1, 20 mL). The Schlenk tube was purged with N<sub>2</sub> and the mixture was stirred at 60 °C for 4 h. The reaction was monitored by TLC. After cooling to rt, the mixture was filtered. The filtrate was diluted with H<sub>2</sub>O and extracted with CH<sub>2</sub>Cl<sub>2</sub>. The crude product was purified by flash chromatography on silica gel (5:1 CH<sub>2</sub>Cl<sub>2</sub>/MeOH) to give 3-((1-aminocyclobutyl)methyl)-1,3-dimethylindolin-2-one as a light yellow oil (102 mg, 86% yield).

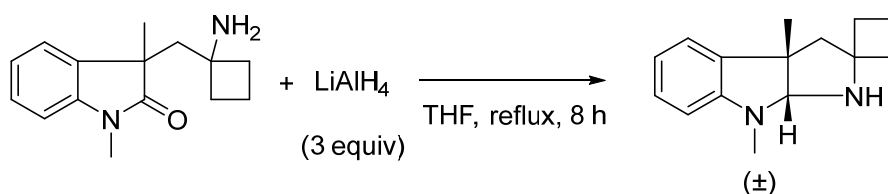

A Schlenk tube charged with a stirring bar was evacuated and backfilled with N<sub>2</sub> (three times). 3-((1-Aminocyclobutyl)methyl)-1,3-dimethylindolin-2-one (98 mg, 0.40 mmol) and anhydrous THF (10 mL)

were added followed by LiAlH<sub>4</sub> (115 mg, 3.0 equiv). The reaction was refluxed (oil bath: 80 °C) for 8 h and monitored by TLC. After cooling to rt, water was added slowly and the mixture was extracted with ethyl acetate. The ethyl acetate extracts were combined, dried over Na<sub>2</sub>SO<sub>4</sub> and concentrated. The crude product was purified by flash chromatography on silica gel (5:1 CH<sub>2</sub>Cl<sub>2</sub>/MeOH) to give 3a',8'-dimethyl-3',3a',8',8a'-tetrahydro-1'H-spiro[cyclobutane-1,2'-pyrrolo[2,3-*b*]indole] as a brown oil (99 mg, 90% yield).

## 6.2 Physical data

### 3-((1-Aminocyclobutyl)methyl)-1,3-dimethylindolin-2-one

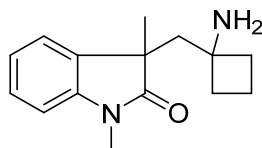

Yellow oil,  $R_f = 0.1$  (5:1 CH<sub>2</sub>Cl<sub>2</sub>/MeOH); <sup>1</sup>H NMR (400 MHz, Chloroform-*d*)  $\delta$  7.24 (d,  $J = 6.6$  Hz, 2H), 7.03 (t,  $J = 7.5$  Hz, 1H), 6.83 (d,  $J = 7.8$  Hz, 1H), 3.19 (s, 5H), 2.38 (d,  $J = 14.6$  Hz, 1H), 2.21 (d,  $J = 14.6$  Hz, 1H), 2.03 (q,  $J = 10.1, 7.8$  Hz, 1H), 1.87 – 1.66 (m, 3H), 1.59 (qd,  $J = 8.4, 5.4, 4.2$  Hz, 1H), 1.44 (dt,  $J = 14.4, 6.3$  Hz, 1H), 1.34 (s, 3H) ppm; <sup>13</sup>C NMR (101 MHz, Chloroform-*d*)  $\delta$  181.5, 142.9, 133.8, 127.8, 123.3, 122.2, 108.2, 56.8, 47.8, 46.9, 36.7, 35.9, 29.6, 26.4, 26.3, 14.3 ppm; IR (film)  $\nu_{max}$  1705, 1612, 1466, 1381, 756 cm<sup>-1</sup>; HRMS (ESI-TOF)  $m/z$ : [M + H]<sup>+</sup> Calcd for C<sub>15</sub>H<sub>21</sub>N<sub>2</sub>O 245.1653; Found 245.1653.

### 3a',8'-Dimethyl-3',3a',8',8a'-tetrahydro-1'H-spiro[cyclobutane-1,2'-pyrrolo[2,3-*b*]indole]

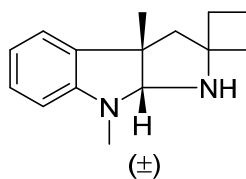

Brown oil,  $R_f = 0.3$  (5:1 CH<sub>2</sub>Cl<sub>2</sub>/MeOH); <sup>1</sup>H NMR (400 MHz, Chloroform-*d*)  $\delta$  7.09 – 6.98 (m, 2H), 6.62 (td,  $J = 7.4, 1.0$  Hz, 1H), 6.28 (dd,  $J = 7.8, 0.9$  Hz, 1H), 4.54 (s, 1H), 2.83 (s, 3H), 2.32 (d,  $J = 12.2$  Hz, 1H), 2.15 (dt,  $J = 11.6, 9.0$  Hz, 1H), 2.08 – 2.01 (m, 1H), 1.91 (dd,  $J = 12.3, 0.7$  Hz, 1H), 1.79 – 1.70 (m, 1H), 1.64 – 1.58 (m, 1H), 1.57 – 1.45 (m, 2H), 1.43 (s, 3H) ppm; <sup>13</sup>C NMR (101 MHz, Chloroform-*d*)  $\delta$  150.1, 136.5, 127.7, 122.2, 116.7, 105.2, 91.1, 64.9, 52.3, 52.3, 37.5, 35.1, 31.7, 26.6, 14.3 ppm; IR (film)

$\nu_{max}$  2970, 1088, 1049, 880, 741  $\text{cm}^{-1}$ ; HRMS (ESI-TOF)  $m/z$ :  $[\text{M} + \text{H}]^+$  Calcd for  $\text{C}_{15}\text{H}_{21}\text{N}_2$  229.1699; Found 229.1706.

## 7. Mechanism experiments

### 7.1 Radical-trapping experiment

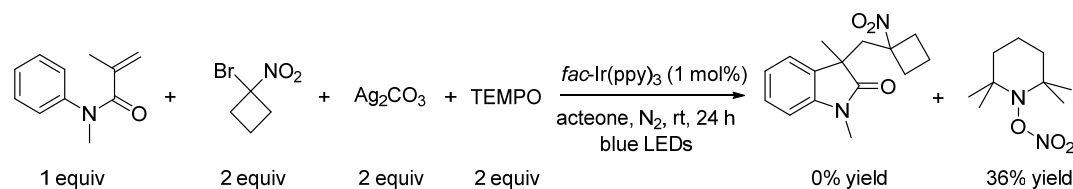

A dry Schlenk tube charged with a stirring bar was evacuated and backfilled with  $\text{N}_2$  (three times). *N*-Methyl-*N*-phenylmethacrylamide (**1a**, 80 mg, 0.45 mmol), 1-bromo-1-nitrocyclobutane (**2f**, 0.15 mL, 0.90 mmol),  $\text{Ag}_2\text{CO}_3$  (250 mg, 0.90 mmol), TEMPO (141 mg, 0.90 mmol) and anhydrous acetone (8.0 mL) were added under  $\text{N}_2$  atmosphere followed by *fac*-Ir(ppy)<sub>3</sub> (5 mg, 1 mol%). The reaction mixture was degassed by freeze-pump-thaw method and then stirred under irradiation with blue LEDs (456 nm, app. 3.0 cm distance from the tube). The mixture was maintained at approximately 25 °C by a desk fan in air-conditioned room. The reaction was monitored by TLC. Upon completion (24 h), the mixture was concentrated in vacuo. The crude product was purified by flash chromatography on silica gel (20:1 hexanes/AcOEt) to give TEMPONO<sub>2</sub> (65 mg, 36% yield, based on **2f**).

## 7.2 X-ray diffraction experiment

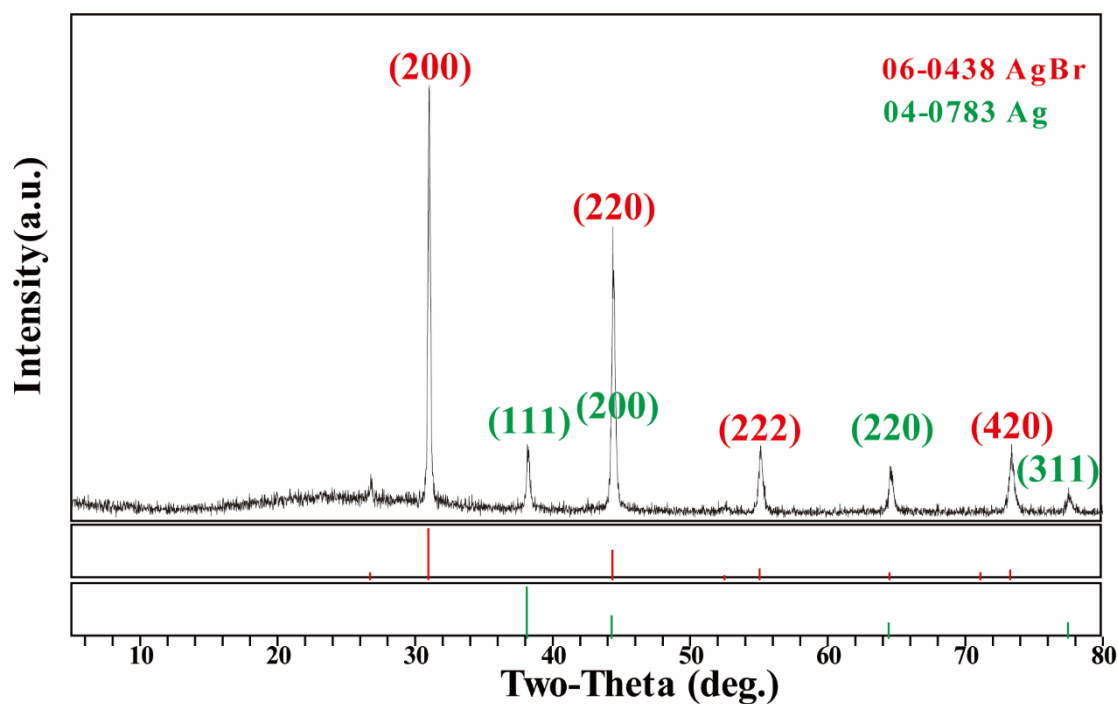

Figure S3 XRD patterns of the precipitate in the mechanism experiment.

## 7.3 Stern–Volmer plot

Stern–Volmer luminescence quenching analysis was conducted at room temperature using an Agilent spectrofluorometer. The excitation wavelength was 420 nm and the emission was collected across a range of 450–750 nm. The samples were placed in a screw-capped quartz cuvette ( $H \times W \times D = 60 \times 12.5 \times 12.5$  mm) of 3.5 mL.

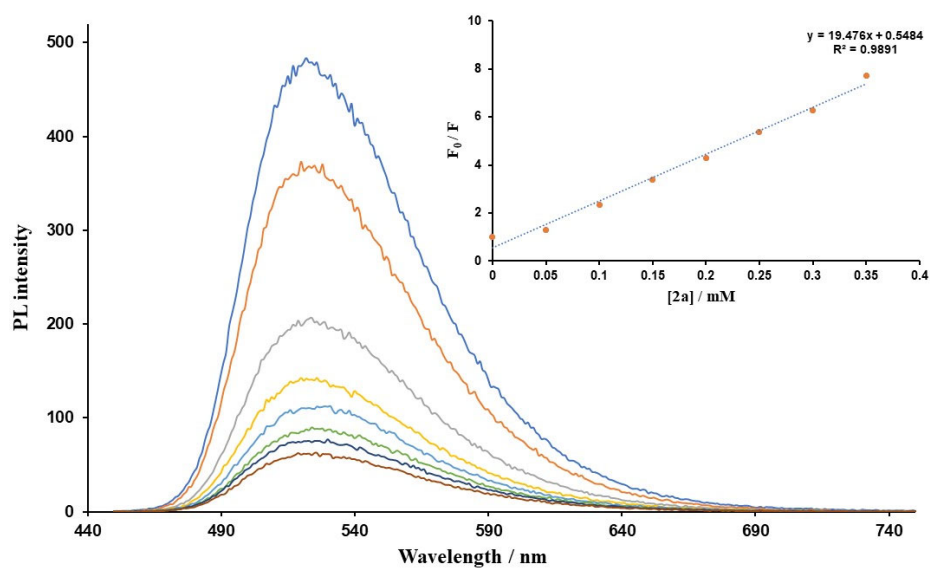

**Figure S4** Luminescence spectra of *fac*-Ir(ppy)<sub>3</sub> (0.5 mM in deaerated CH<sub>3</sub>CN) quenched with varying concentrations (0.05 mM to 0.4 mM) of 1-bromo-1-nitrocyclobutane **2f** at 25 °C. Inset is the corresponding Stern–Volmer plot.

## 7.4 Physical data

### 2,2,6,6-Tetramethylpiperidin-1-yl nitrate<sup>25</sup>

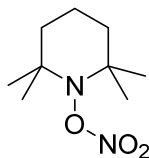

Orange oil (36% yield, based on **2f**);  $R_f = 0.6$  (10:1 hexanes/AcOEt); <sup>1</sup>H NMR (600 MHz, Chloroform-*d*)  $\delta$  1.79 (dq,  $J = 6.2, 2.3$  Hz, 2H), 1.65 (dddd,  $J = 7.6, 5.8, 3.6, 2.1$  Hz, 2H), 1.58 (d,  $J = 2.8$  Hz, 8H), 1.38 (d,  $J = 3.0$  Hz, 6H) ppm; <sup>13</sup>C NMR (150 MHz, Chloroform-*d*)  $\delta$  41.4, 38.8, 31.8, 26.0, 16.1 ppm; IR (film)  $\nu_{max}$  2947, 1790, 1605, 1450, 1366, 1258, 1134, 1049 cm<sup>-1</sup>.

## 8. Unsuccessful reactants

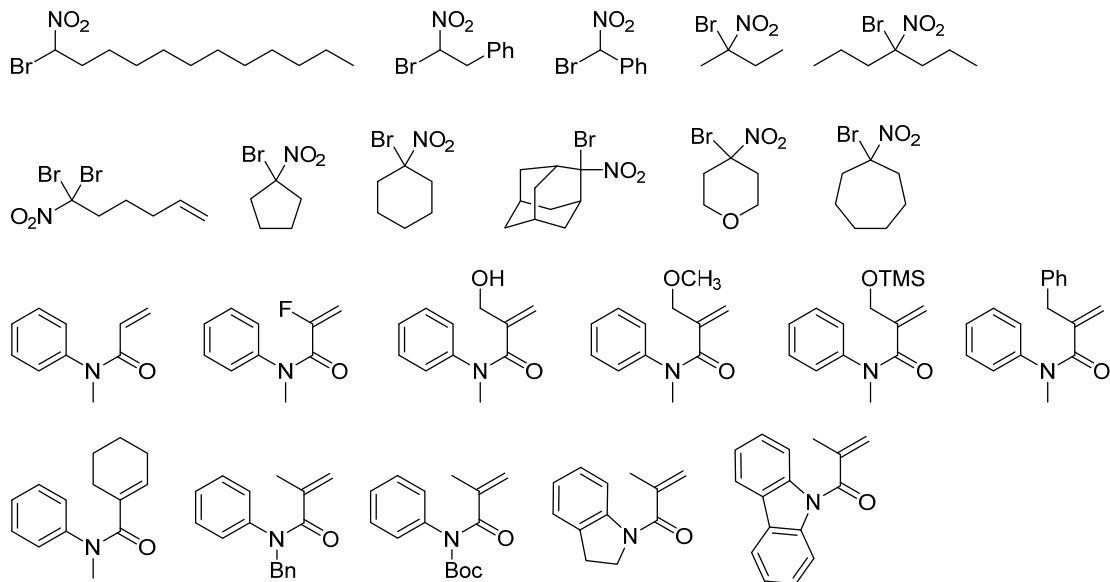



## 9. Crystal data

CCDC numbers: 2235177; 2235178; 2235872; 2236062; 2235193; 2238530.

Single crystals of **3aa**, **3ae** and **3uf** were obtained by layering a CH<sub>2</sub>Cl<sub>2</sub> solution with *n*-hexane and subsequent slow evaporation of the solvents at rt. Single crystals of **3ai**, **3tf**, **3tf'** were obtained by layering an AcOEt solution with *n*-hexane and subsequent slow evaporation of the solvents at rt. The ellipsoid contour probability level is 50%.

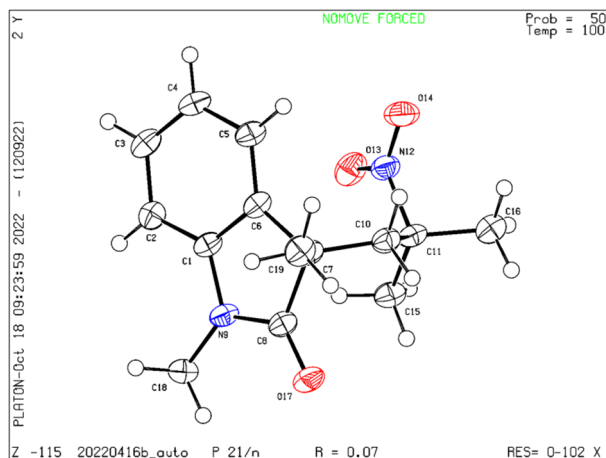

### Crystal data and structure refinement for **3ad**.

|                                             |                                                               |
|---------------------------------------------|---------------------------------------------------------------|
| Temperature/K                               | 100(2)                                                        |
| Crystal system                              | monoclinic                                                    |
| Space group                                 | P2 <sub>1</sub> /n                                            |
| a/Å                                         | 13.3740(4)                                                    |
| b/Å                                         | 6.6672(3)                                                     |
| c/Å                                         | 15.1512(6)                                                    |
| $\alpha$ /°                                 | 90                                                            |
| $\beta$ /°                                  | 98.804(4)                                                     |
| $\gamma$ /°                                 | 90                                                            |
| Volume/Å <sup>3</sup>                       | 1335.07(9)                                                    |
| Z                                           | 4                                                             |
| $\rho_{\text{calc}}/\text{cm}^3$            | 1.305                                                         |
| $\mu/\text{mm}^{-1}$                        | 0.758                                                         |
| F(000)                                      | 560.0                                                         |
| Crystal size/mm <sup>3</sup>                | 0.500 × 0.500 × 0.400                                         |
| Radiation                                   | CuK $\alpha$ ( $\lambda$ = 1.54184)                           |
| 2 $\theta$ range for data collection/°      | 8.218 to 152.7                                                |
| Index ranges                                | -16 ≤ h ≤ 16, -7 ≤ k ≤ 7, -18 ≤ l ≤ 19                        |
| Reflections collected                       | 11615                                                         |
| Independent reflections                     | 2637 [R <sub>int</sub> = 0.0880, R <sub>sigma</sub> = 0.0693] |
| Data/restraints/parameters                  | 2637/0/176                                                    |
| Goodness-of-fit on F <sup>2</sup>           | 1.030                                                         |
| Final R indexes [I ≥ 2 $\sigma$ (I)]        | R <sub>1</sub> = 0.0698, wR <sub>2</sub> = 0.1849             |
| Final R indexes [all data]                  | R <sub>1</sub> = 0.0977, wR <sub>2</sub> = 0.2162             |
| Largest diff. peak/hole / e Å <sup>-3</sup> | 0.43/-0.32                                                    |

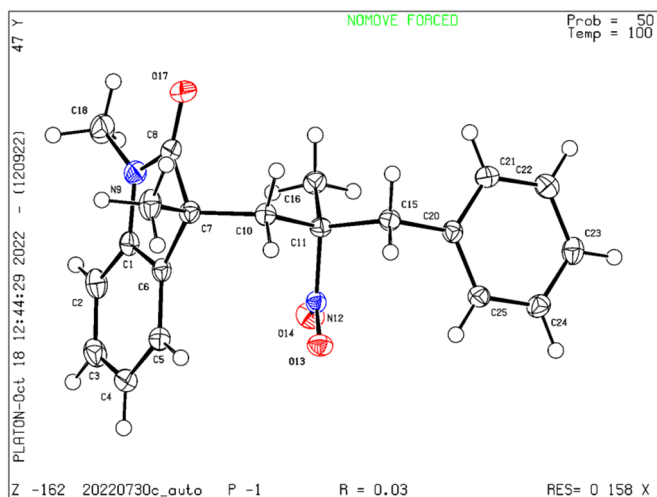

### Crystal data and structure refinement for **3ae**.

|                                             |                                                               |
|---------------------------------------------|---------------------------------------------------------------|
| Temperature/K                               | 100(2)                                                        |
| Crystal system                              | triclinic                                                     |
| Space group                                 | P-1                                                           |
| a/Å                                         | 8.1551(9)                                                     |
| b/Å                                         | 11.4451(13)                                                   |
| c/Å                                         | 11.4726(13)                                                   |
| $\alpha$ /°                                 | 62.610(11)                                                    |
| $\beta$ /°                                  | 70.408(10)                                                    |
| $\gamma$ /°                                 | 87.885(9)                                                     |
| Volume/Å <sup>3</sup>                       | 886.86(19)                                                    |
| Z                                           | 2                                                             |
| $\rho_{\text{calc}}/\text{cm}^3$            | 1.267                                                         |
| $\mu/\text{mm}^{-1}$                        | 0.692                                                         |
| F(000)                                      | 360.0                                                         |
| Crystal size/mm <sup>3</sup>                | 0.400 × 0.300 × 0.100                                         |
| Radiation                                   | CuK $\alpha$ ( $\lambda$ = 1.54184)                           |
| 2 $\theta$ range for data collection/°      | 8.788 to 151.67                                               |
| Index ranges                                | -10 ≤ h ≤ 9, -14 ≤ k ≤ 14, -14 ≤ l ≤ 14                       |
| Reflections collected                       | 32637                                                         |
| Independent reflections                     | 3536 [R <sub>int</sub> = 0.0406, R <sub>sigma</sub> = 0.0164] |
| Data/restraints/parameters                  | 3536/0/230                                                    |
| Goodness-of-fit on F <sup>2</sup>           | 1.057                                                         |
| Final R indexes [I ≥ 2 $\sigma$ (I)]        | R <sub>1</sub> = 0.0344, wR <sub>2</sub> = 0.0860             |
| Final R indexes [all data]                  | R <sub>1</sub> = 0.0363, wR <sub>2</sub> = 0.0872             |
| Largest diff. peak/hole / e Å <sup>-3</sup> | 0.25/-0.22                                                    |

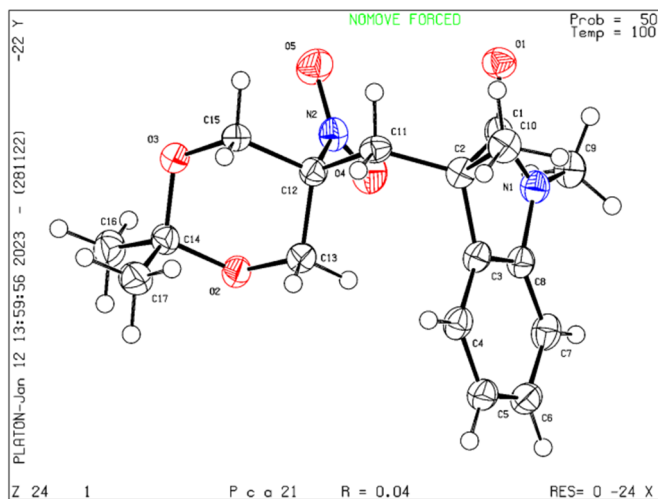

### Crystal data and structure refinement for **3ai**.

|                                             |                                                               |
|---------------------------------------------|---------------------------------------------------------------|
| Temperature/K                               | 99.99(10)                                                     |
| Crystal system                              | orthorhombic                                                  |
| Space group                                 | Pca2 <sub>1</sub>                                             |
| a/Å                                         | 10.2000(3)                                                    |
| b/Å                                         | 12.8987(3)                                                    |
| c/Å                                         | 12.6329(4)                                                    |
| α/°                                         | 90                                                            |
| β/°                                         | 90                                                            |
| γ/°                                         | 90                                                            |
| Volume/Å <sup>3</sup>                       | 1662.07(8)                                                    |
| Z                                           | 4                                                             |
| ρ <sub>calc</sub> /cm <sup>3</sup>          | 1.336                                                         |
| μ/mm <sup>-1</sup>                          | 0.820                                                         |
| F(000)                                      | 712.0                                                         |
| Crystal size/mm <sup>3</sup>                | 0.2 × 0.15 × 0.1                                              |
| Radiation                                   | Cu Kα (λ = 1.54184)                                           |
| 2θ range for data collection/°              | 6.852 to 153.262                                              |
| Index ranges                                | -12 ≤ h ≤ 10, -16 ≤ k ≤ 16, -15 ≤ l ≤ 15                      |
| Reflections collected                       | 10868                                                         |
| Independent reflections                     | 3147 [R <sub>int</sub> = 0.0759, R <sub>sigma</sub> = 0.0754] |
| Data/restraints/parameters                  | 3147/1/221                                                    |
| Goodness-of-fit on F <sup>2</sup>           | 1.031                                                         |
| Final R indexes [I ≥ 2σ (I)]                | R <sub>1</sub> = 0.0437, wR <sub>2</sub> = 0.1004             |
| Final R indexes [all data]                  | R <sub>1</sub> = 0.0555, wR <sub>2</sub> = 0.1072             |
| Largest diff. peak/hole / e Å <sup>-3</sup> | 0.16/-0.18                                                    |
| Flack parameter                             | 0.0(2)                                                        |

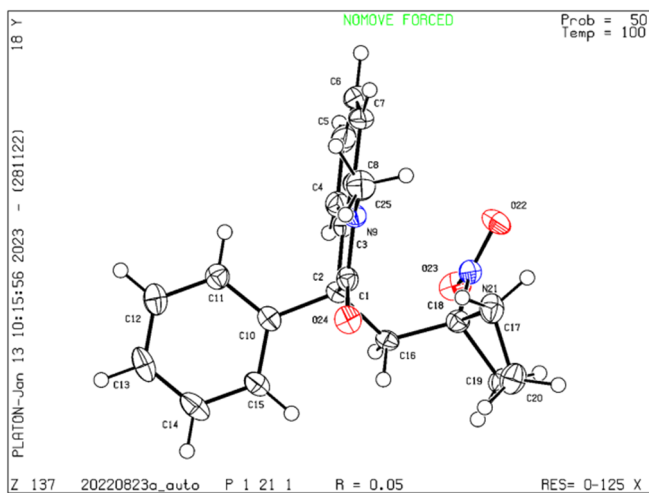


---

Crystal data and structure refinement for **3tf**.

---

|                                             |                                                               |
|---------------------------------------------|---------------------------------------------------------------|
| Temperature/K                               | 100.00(10)                                                    |
| Crystal system                              | monoclinic                                                    |
| Space group                                 | P2 <sub>1</sub>                                               |
| a/Å                                         | 10.3516(6)                                                    |
| b/Å                                         | 8.7894(3)                                                     |
| c/Å                                         | 10.7156(7)                                                    |
| $\alpha$ /°                                 | 90                                                            |
| $\beta$ /°                                  | 118.800(8)                                                    |
| $\gamma$ /°                                 | 90                                                            |
| Volume/Å <sup>3</sup>                       | 854.35(10)                                                    |
| Z                                           | 2                                                             |
| $\rho_{\text{calc}}/\text{cm}^3$            | 1.308                                                         |
| $\mu/\text{mm}^{-1}$                        | 0.718                                                         |
| F(000)                                      | 356.0                                                         |
| Crystal size/mm <sup>3</sup>                | 0.2 × 0.2 × 0.15                                              |
| Radiation                                   | Cu K $\alpha$ ( $\lambda$ = 1.54184)                          |
| 2 $\theta$ range for data collection/°      | 9.418 to 153.336                                              |
| Index ranges                                | -13 ≤ h ≤ 12, -10 ≤ k ≤ 11, -13 ≤ l ≤ 11                      |
| Reflections collected                       | 8156                                                          |
| Independent reflections                     | 3052 [R <sub>int</sub> = 0.0626, R <sub>sigma</sub> = 0.0633] |
| Data/restraints/parameters                  | 3052/1/228                                                    |
| Goodness-of-fit on F <sup>2</sup>           | 1.059                                                         |
| Final R indexes [I ≥ 2 $\sigma$ (I)]        | R <sub>1</sub> = 0.0452, wR <sub>2</sub> = 0.1067             |
| Final R indexes [all data]                  | R <sub>1</sub> = 0.0521, wR <sub>2</sub> = 0.1112             |
| Largest diff. peak/hole / e Å <sup>-3</sup> | 0.18/-0.21                                                    |
| Flack parameter                             | 0.1(3)                                                        |

---

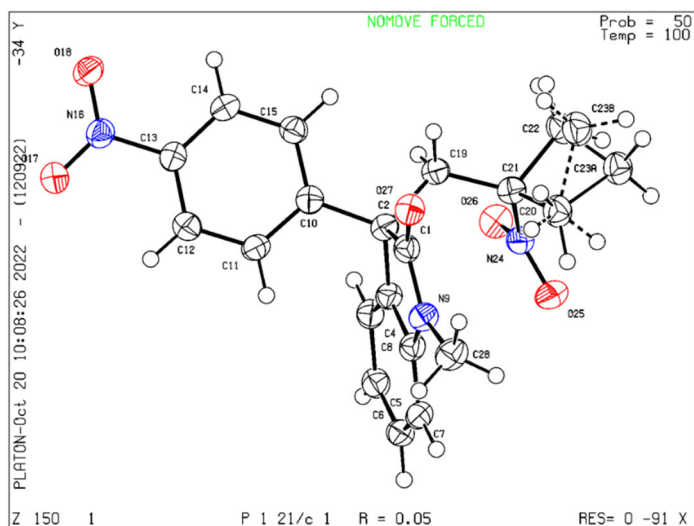


---

Crystal data and structure refinement for **3tf'**.

---

|                                             |                                                               |
|---------------------------------------------|---------------------------------------------------------------|
| Temperature/K                               | 99.99(10)                                                     |
| Crystal system                              | monoclinic                                                    |
| Space group                                 | P2 <sub>1</sub> /c                                            |
| a/Å                                         | 18.2829(10)                                                   |
| b/Å                                         | 8.1950(5)                                                     |
| c/Å                                         | 12.6580(7)                                                    |
| $\alpha$ /°                                 | 90                                                            |
| $\beta$ /°                                  | 106.083(6)                                                    |
| $\gamma$ /°                                 | 90                                                            |
| Volume/Å <sup>3</sup>                       | 1822.30(19)                                                   |
| Z                                           | 4                                                             |
| $\rho_{\text{calc}}/\text{cm}^3$            | 1.390                                                         |
| $\mu/\text{mm}^{-1}$                        | 0.845                                                         |
| F(000)                                      | 800.0                                                         |
| Crystal size/mm <sup>3</sup>                | 0.2 × 0.2 × 0.1                                               |
| Radiation                                   | Cu K $\alpha$ ( $\lambda$ = 1.54184)                          |
| 2 $\theta$ range for data collection/°      | 10.07 to 153.482                                              |
| Index ranges                                | -22 ≤ h ≤ 22, -10 ≤ k ≤ 10, -15 ≤ l ≤ 15                      |
| Reflections collected                       | 31943                                                         |
| Independent reflections                     | 3709 [R <sub>int</sub> = 0.1376, R <sub>sigma</sub> = 0.0640] |
| Data/restraints/parameters                  | 3709/12/264                                                   |
| Goodness-of-fit on F <sup>2</sup>           | 1.069                                                         |
| Final R indexes [I ≥ 2 $\sigma$ (I)]        | R <sub>1</sub> = 0.0496, wR <sub>2</sub> = 0.1310             |
| Final R indexes [all data]                  | R <sub>1</sub> = 0.0663, wR <sub>2</sub> = 0.1429             |
| Largest diff. peak/hole / e Å <sup>-3</sup> | 0.24/-0.21                                                    |

---

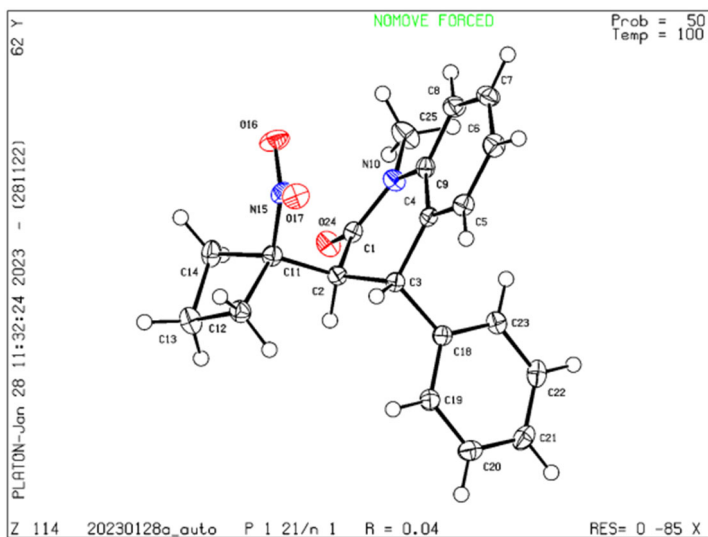

### Crystal data and structure refinement for **3uf**.

|                                             |                                                               |
|---------------------------------------------|---------------------------------------------------------------|
| Temperature/K                               | 100(2)                                                        |
| Crystal system                              | monoclinic                                                    |
| Space group                                 | P2 <sub>1</sub> /n                                            |
| a/Å                                         | 7.9343(3)                                                     |
| b/Å                                         | 19.1994(7)                                                    |
| c/Å                                         | 11.1708(2)                                                    |
| α/°                                         | 90                                                            |
| β/°                                         | 90.627(3)                                                     |
| γ/°                                         | 90                                                            |
| Volume/Å <sup>3</sup>                       | 1701.59(10)                                                   |
| Z                                           | 4                                                             |
| ρ <sub>calc</sub> /cm <sup>3</sup>          | 1.313                                                         |
| μ/mm <sup>-1</sup>                          | 0.721                                                         |
| F(000)                                      | 712.0                                                         |
| Crystal size/mm <sup>3</sup>                | ? × ? × ?                                                     |
| Radiation                                   | CuKα (λ = 1.54184)                                            |
| 2θ range for data collection/°              | 9.16 to 153.302                                               |
| Index ranges                                | -10 ≤ h ≤ 8, -24 ≤ k ≤ 22, -13 ≤ l ≤ 14                       |
| Reflections collected                       | 16238                                                         |
| Independent reflections                     | 3413 [R <sub>int</sub> = 0.0614, R <sub>sigma</sub> = 0.0390] |
| Data/restraints/parameters                  | 3413/0/228                                                    |
| Goodness-of-fit on F <sup>2</sup>           | 1.094                                                         |
| Final R indexes [I ≥ 2σ (I)]                | R <sub>1</sub> = 0.0407, wR <sub>2</sub> = 0.1100             |
| Final R indexes [all data]                  | R <sub>1</sub> = 0.0454, wR <sub>2</sub> = 0.1132             |
| Largest diff. peak/hole / e Å <sup>-3</sup> | 0.27/-0.21                                                    |

## 10. NMR spectra

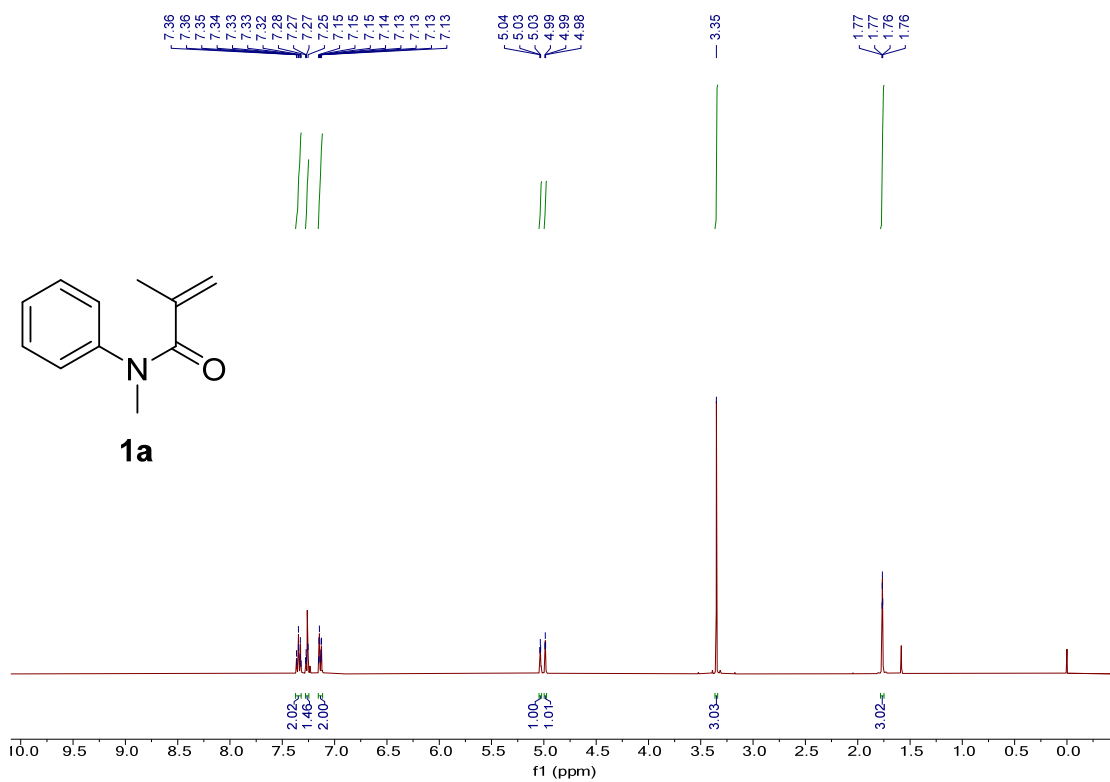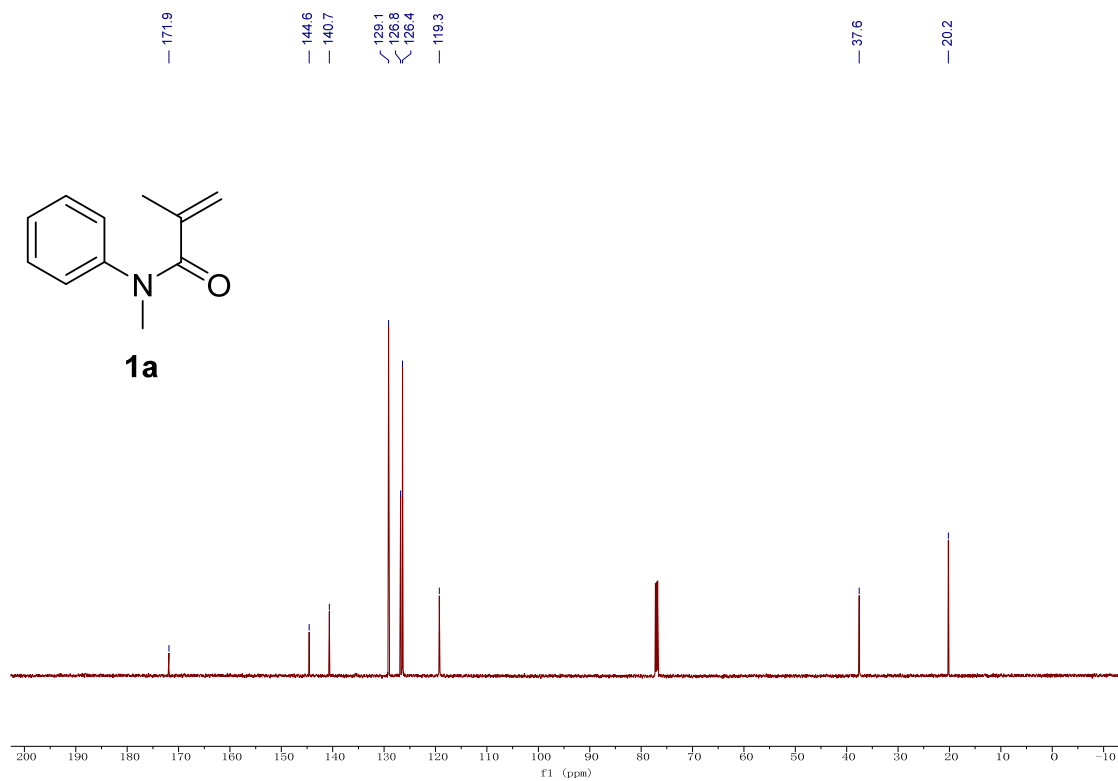



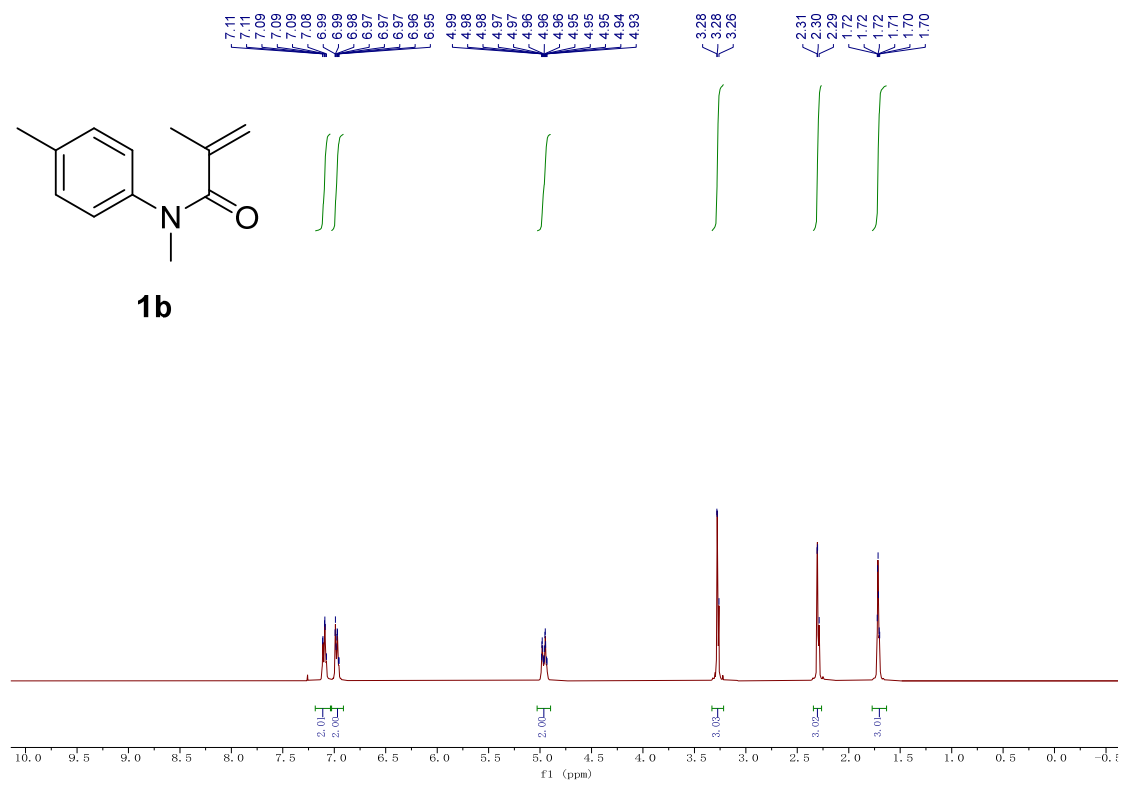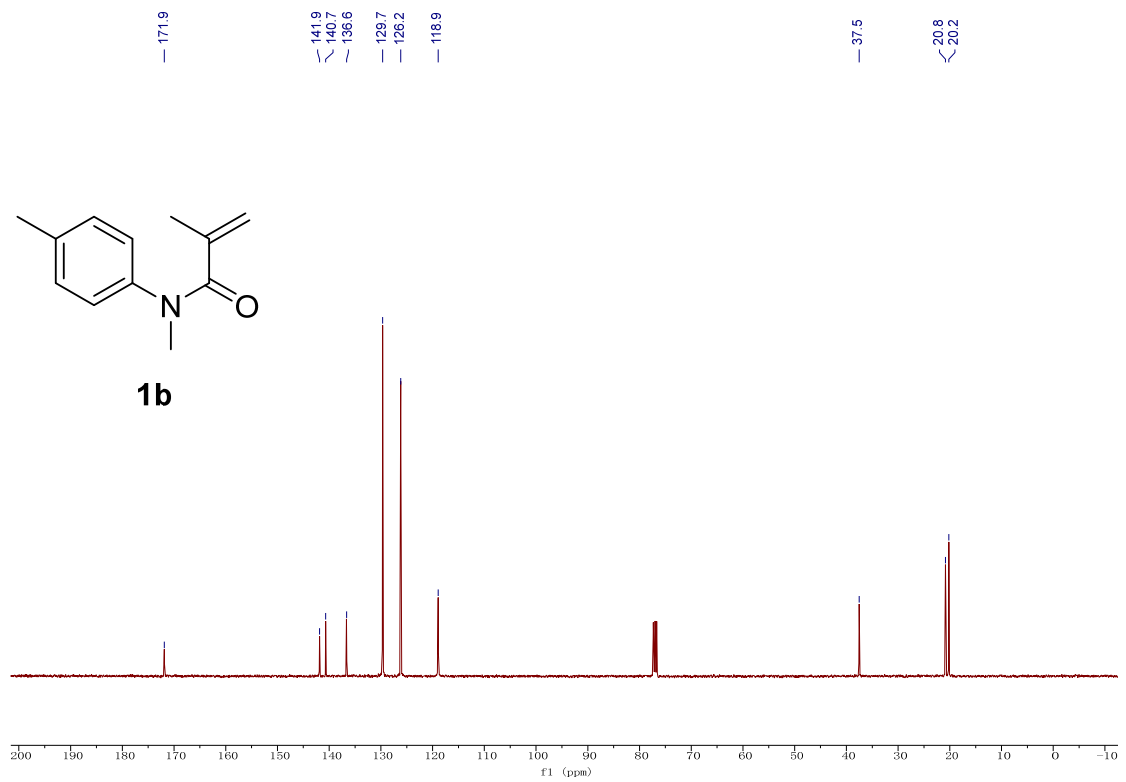

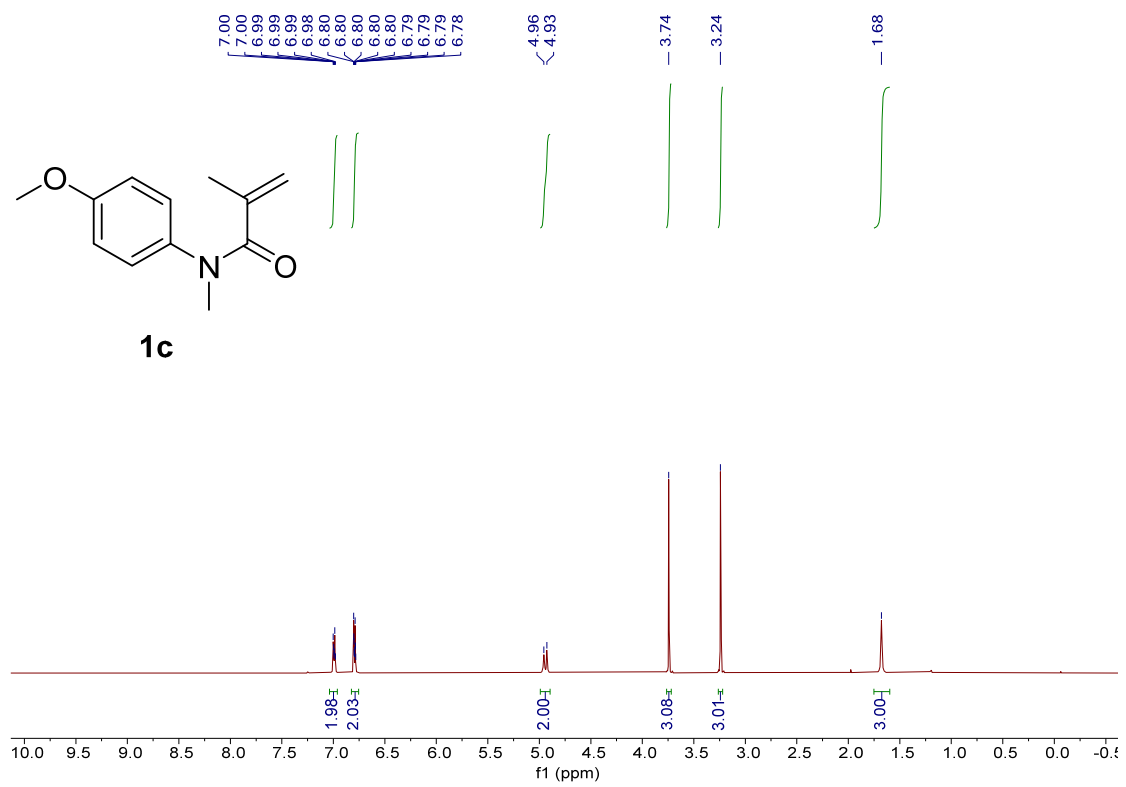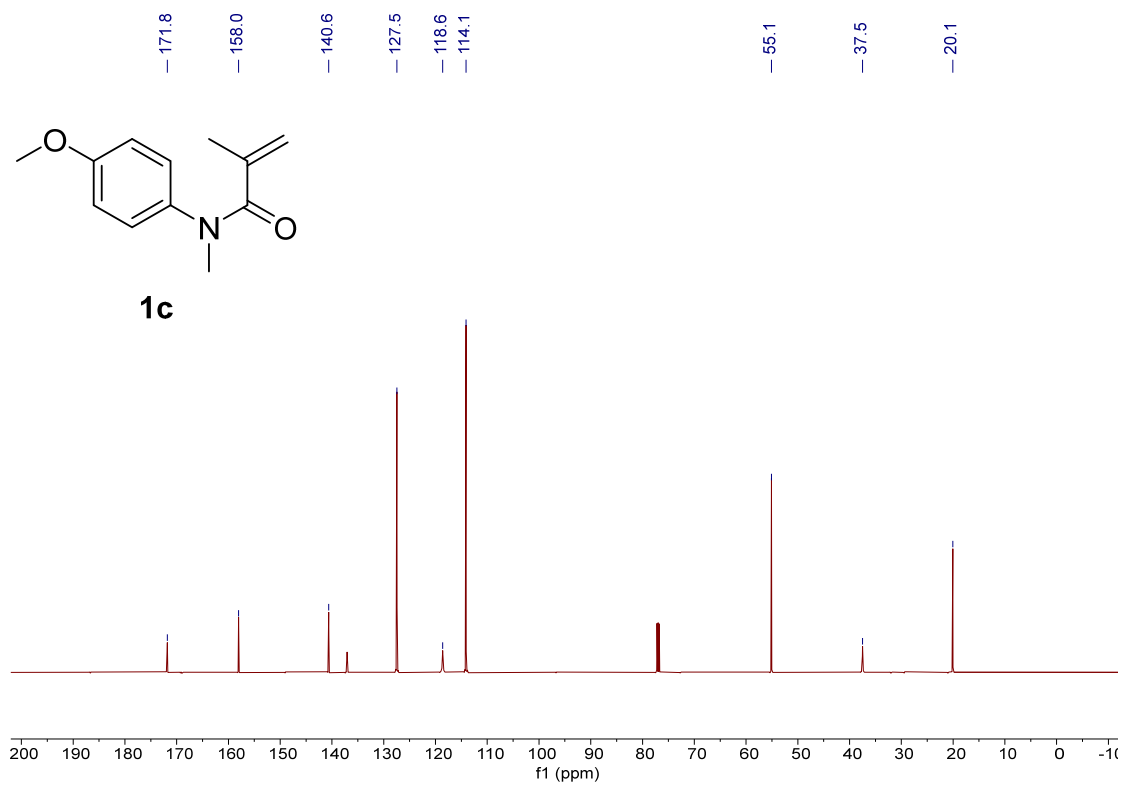

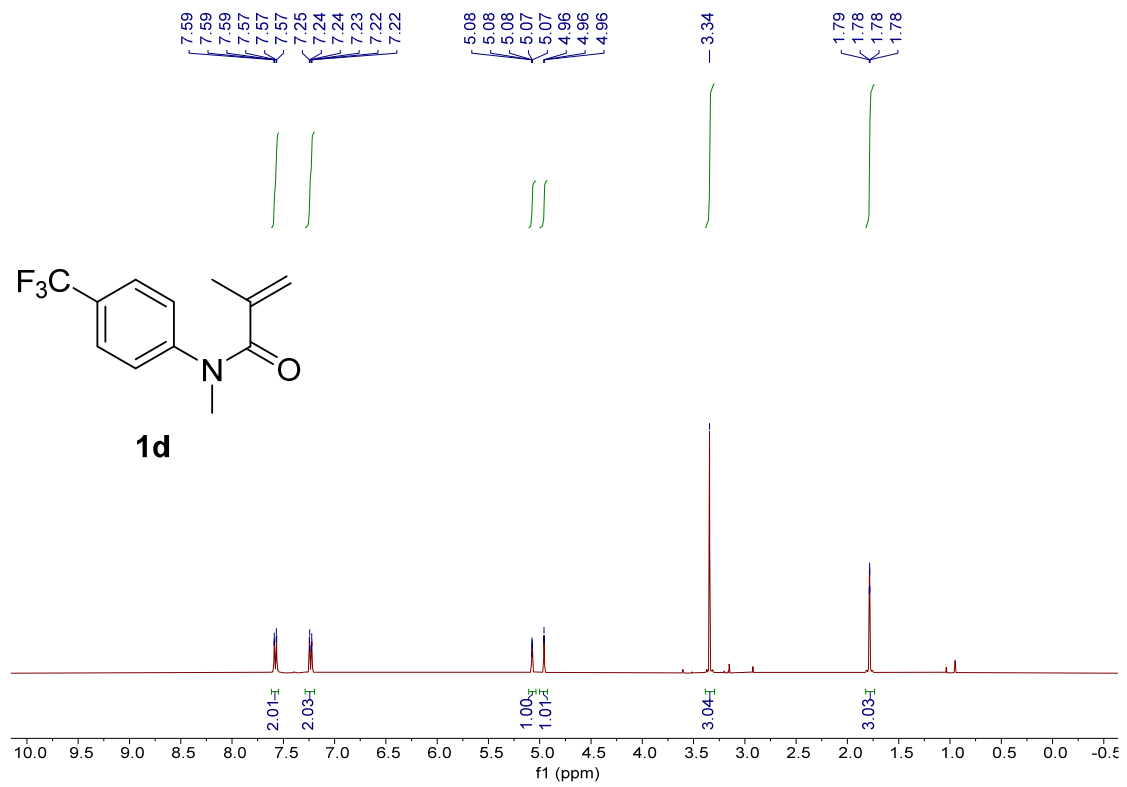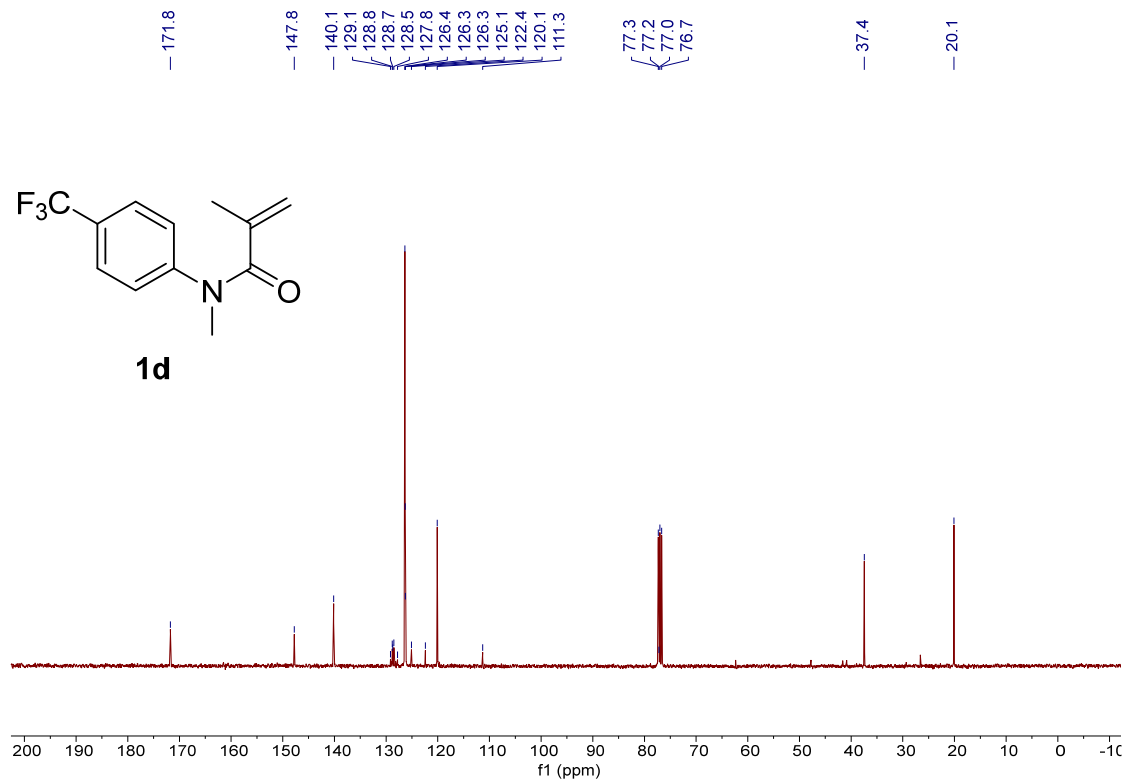

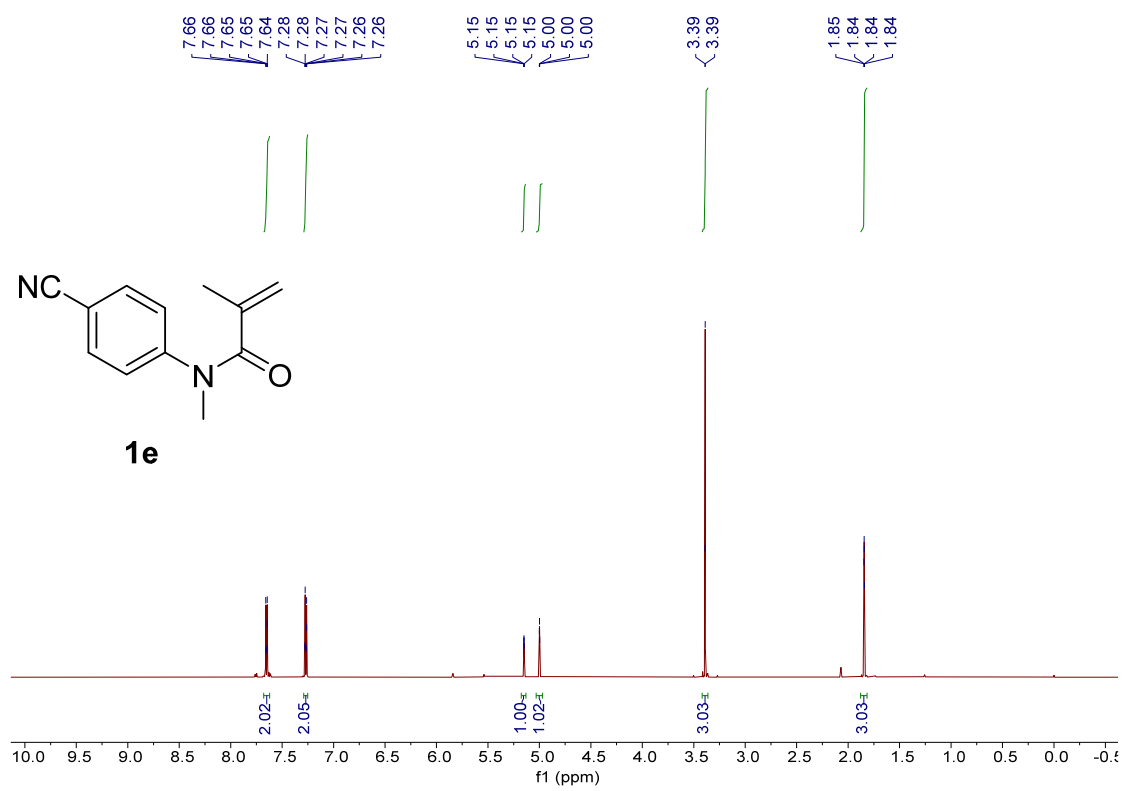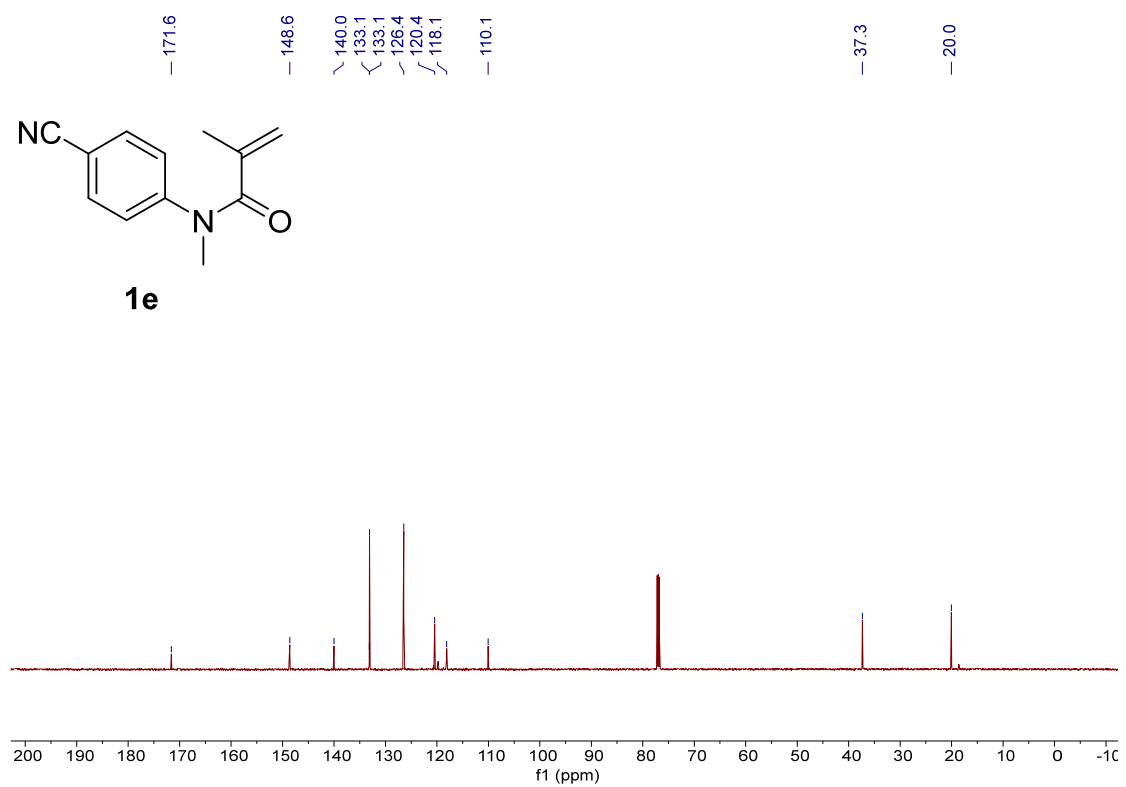

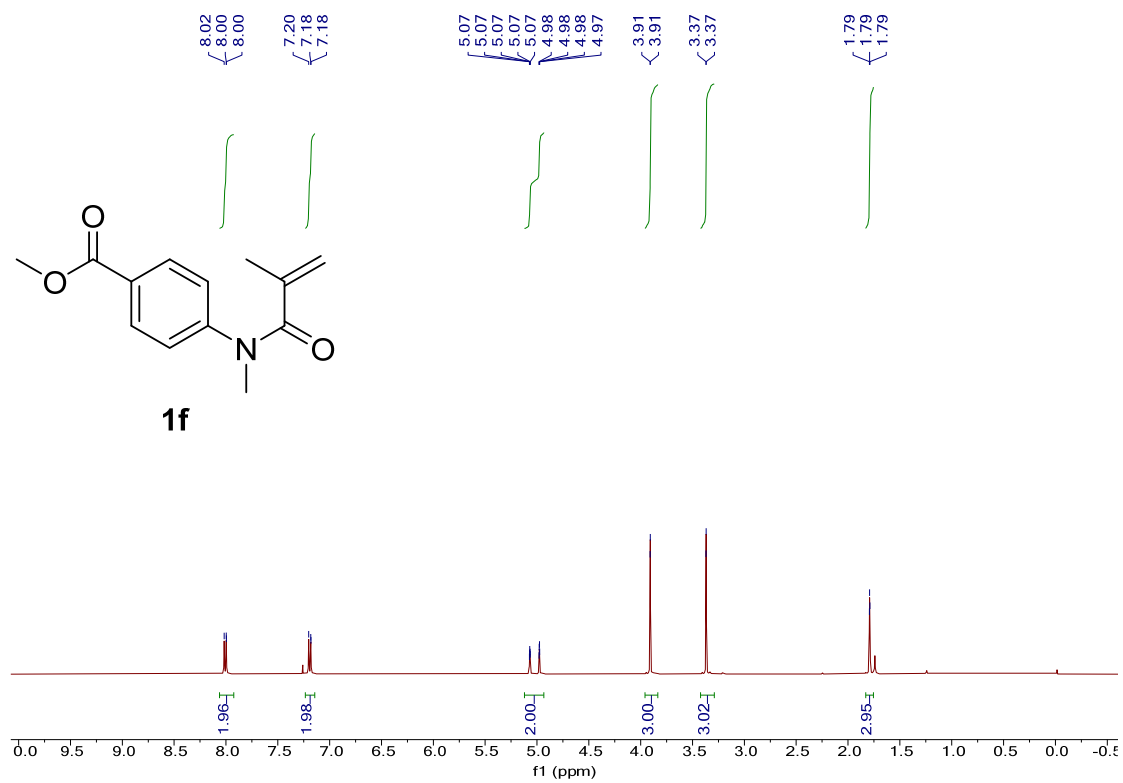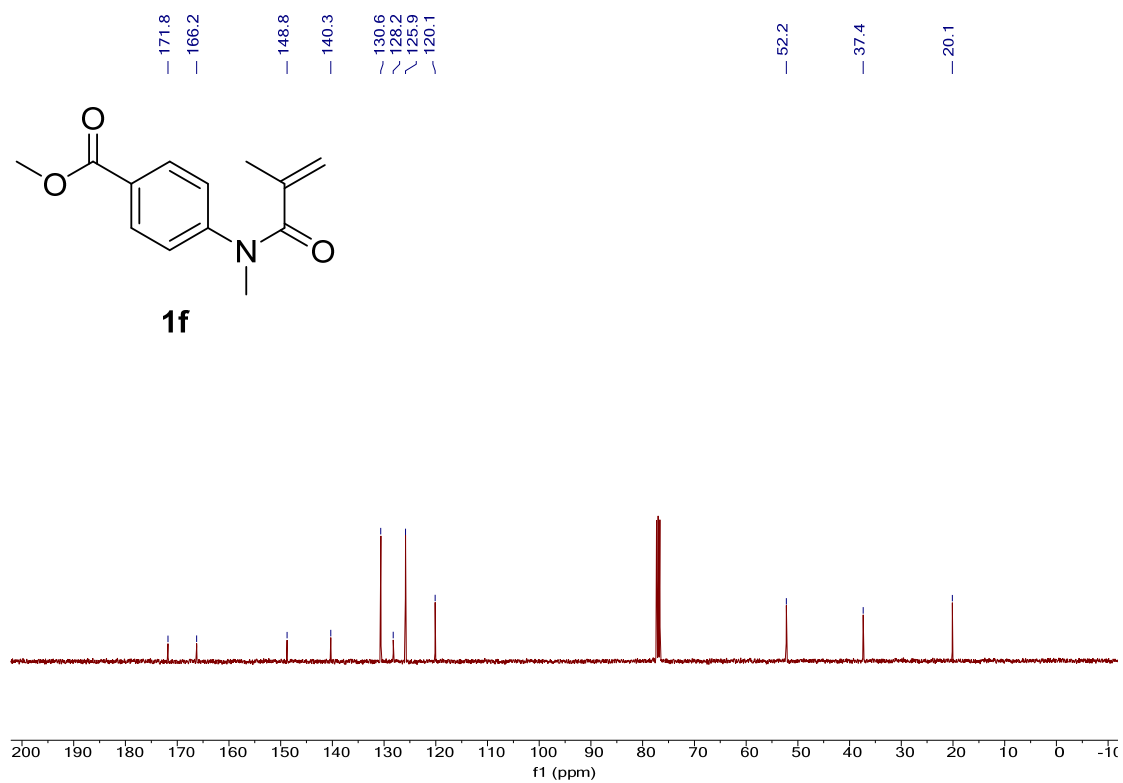

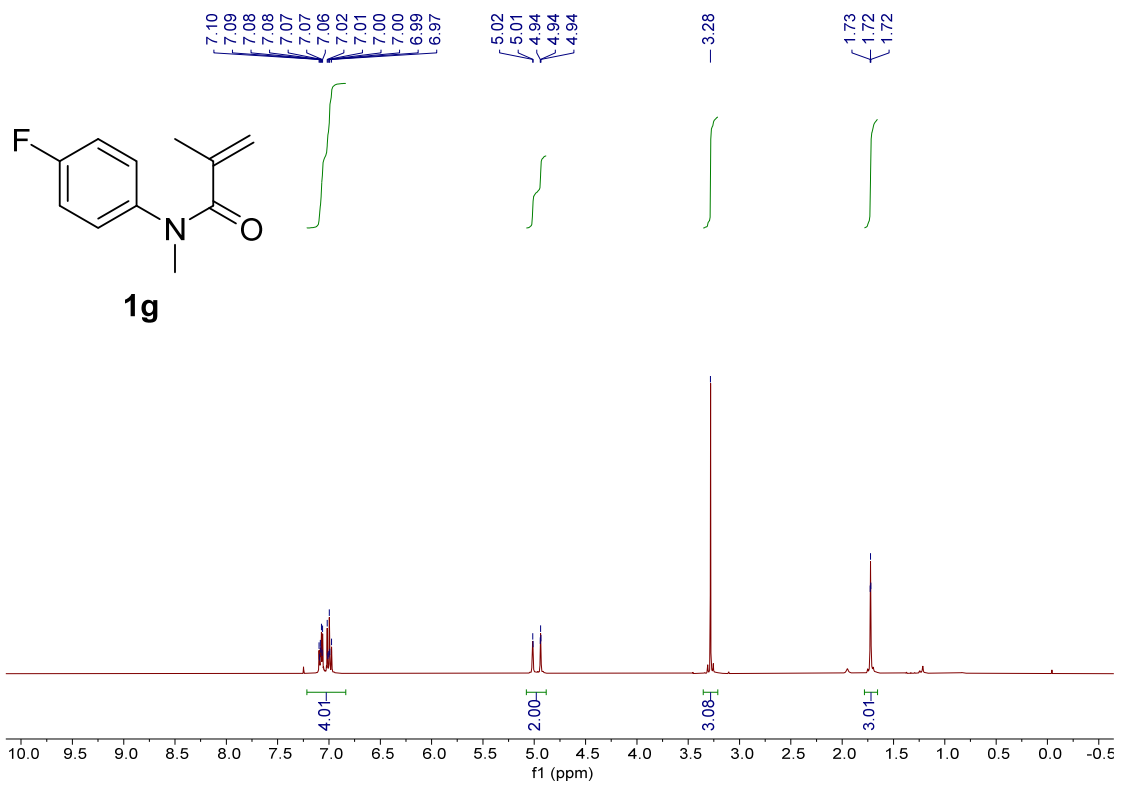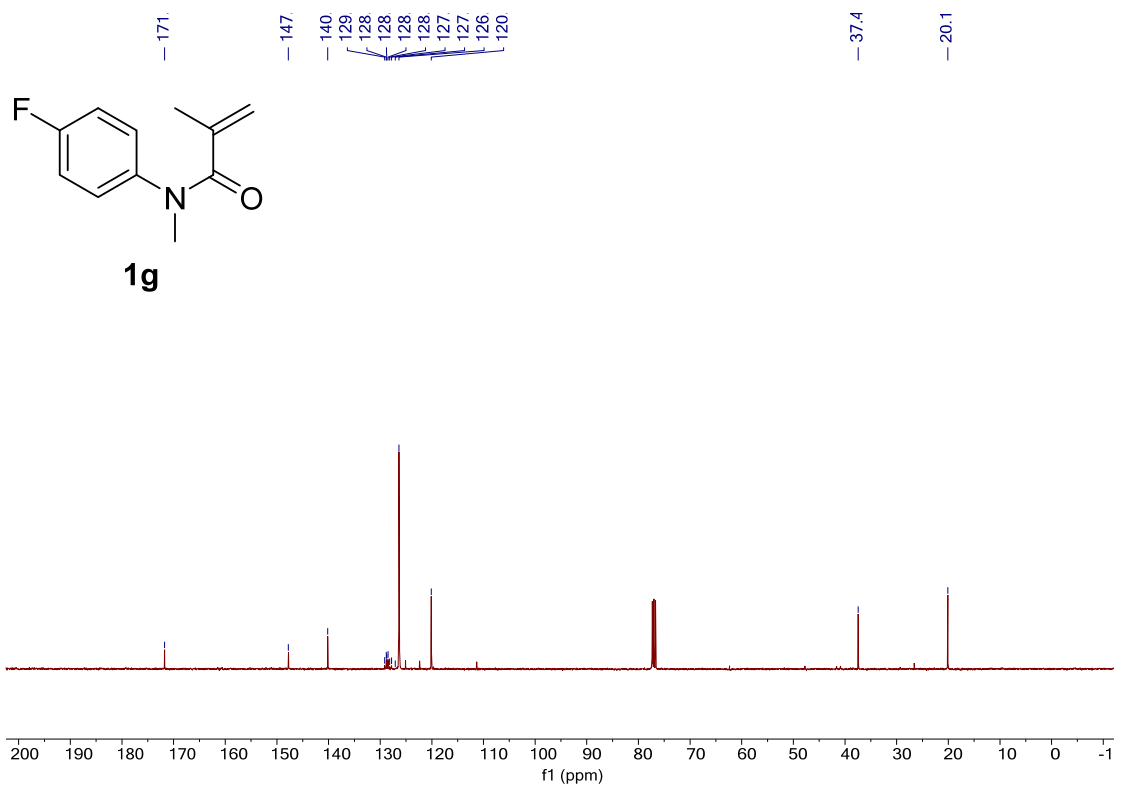

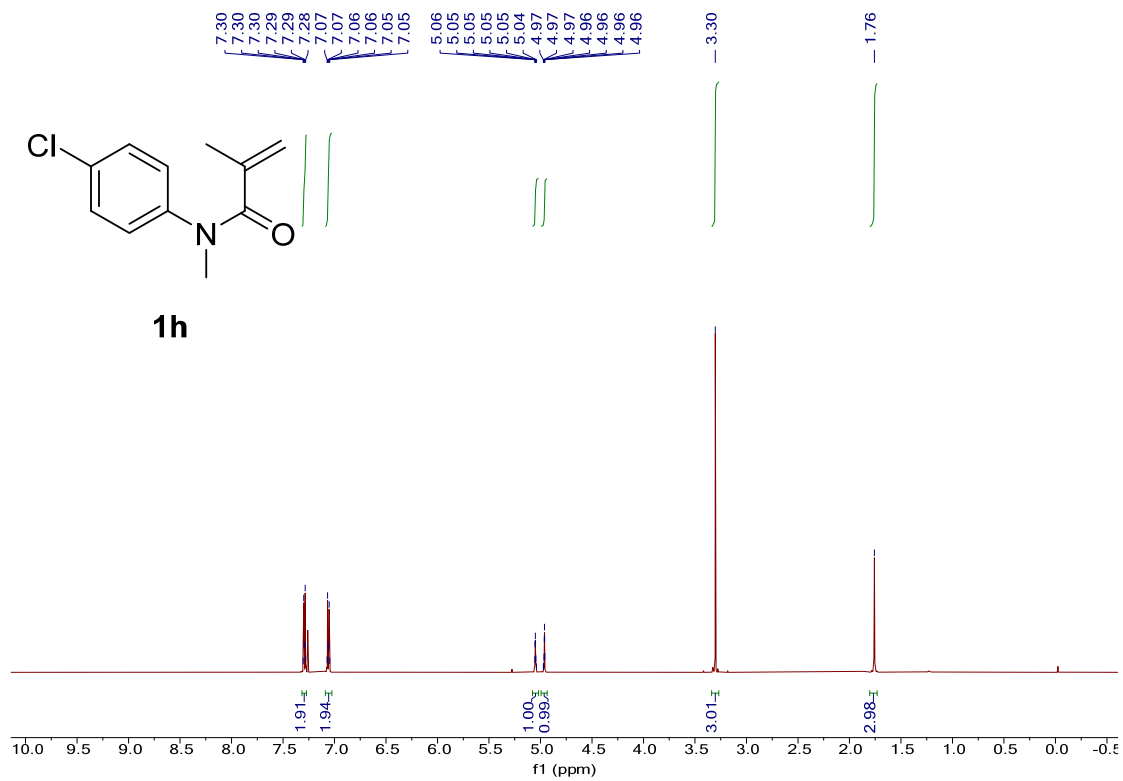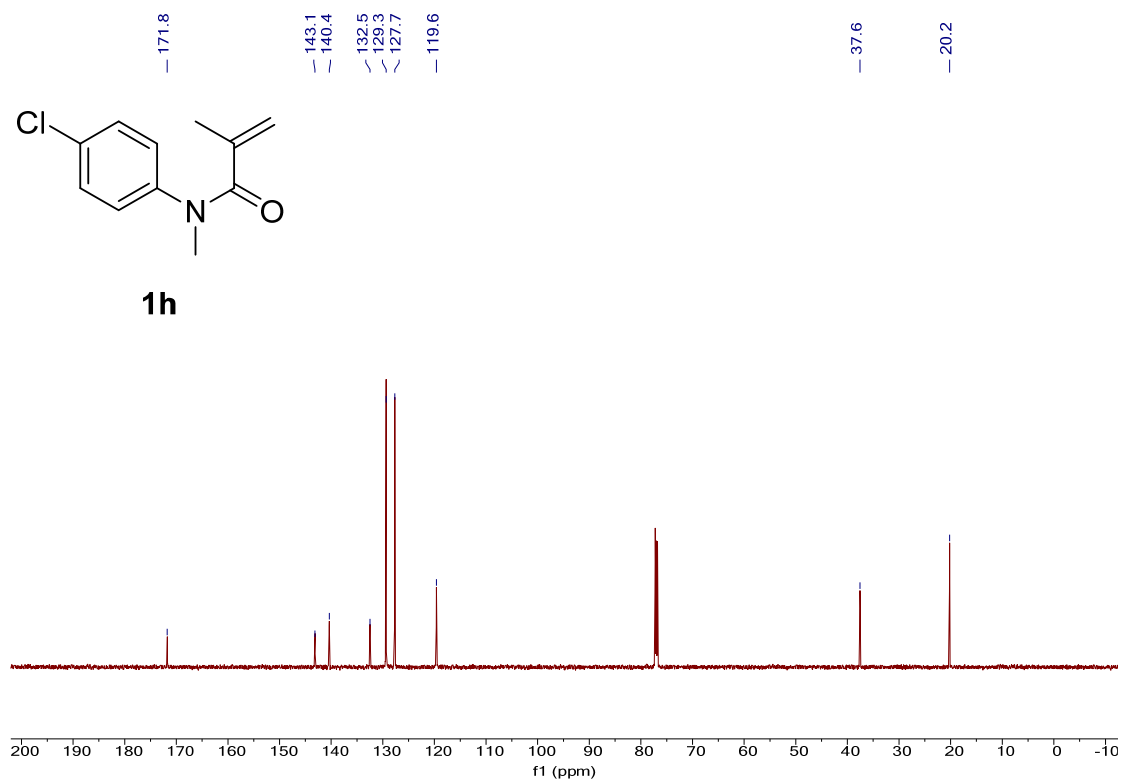

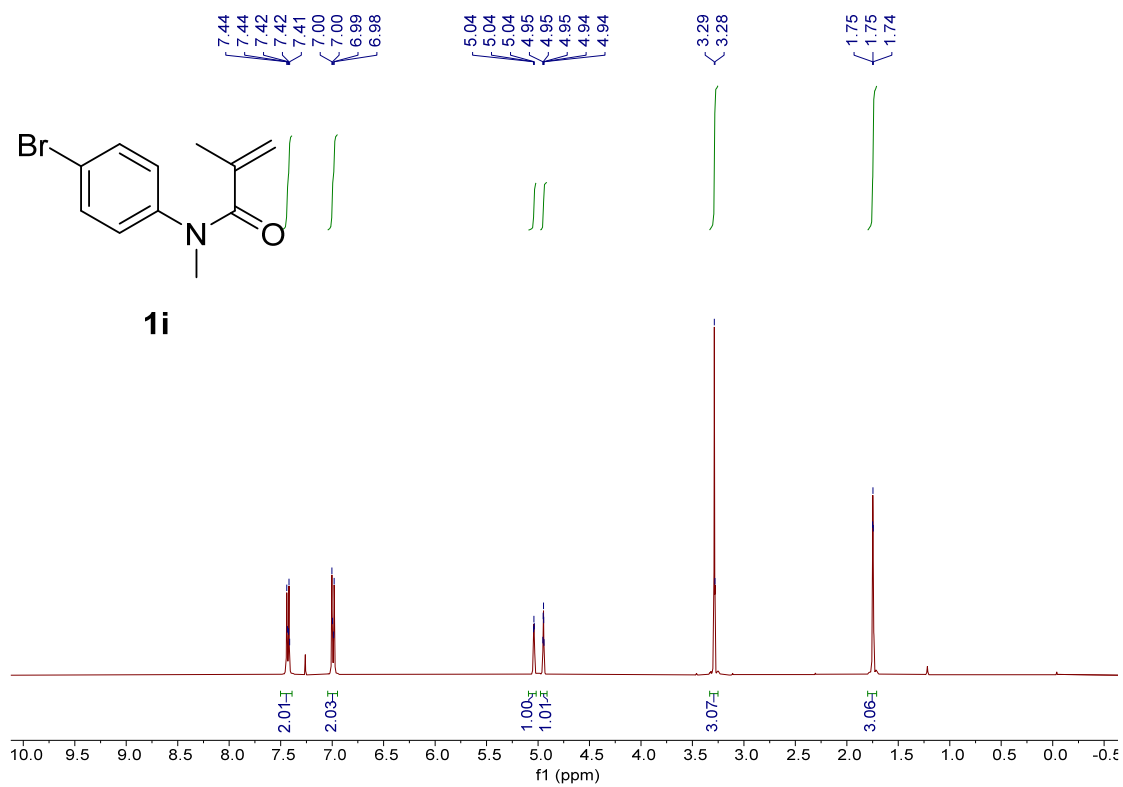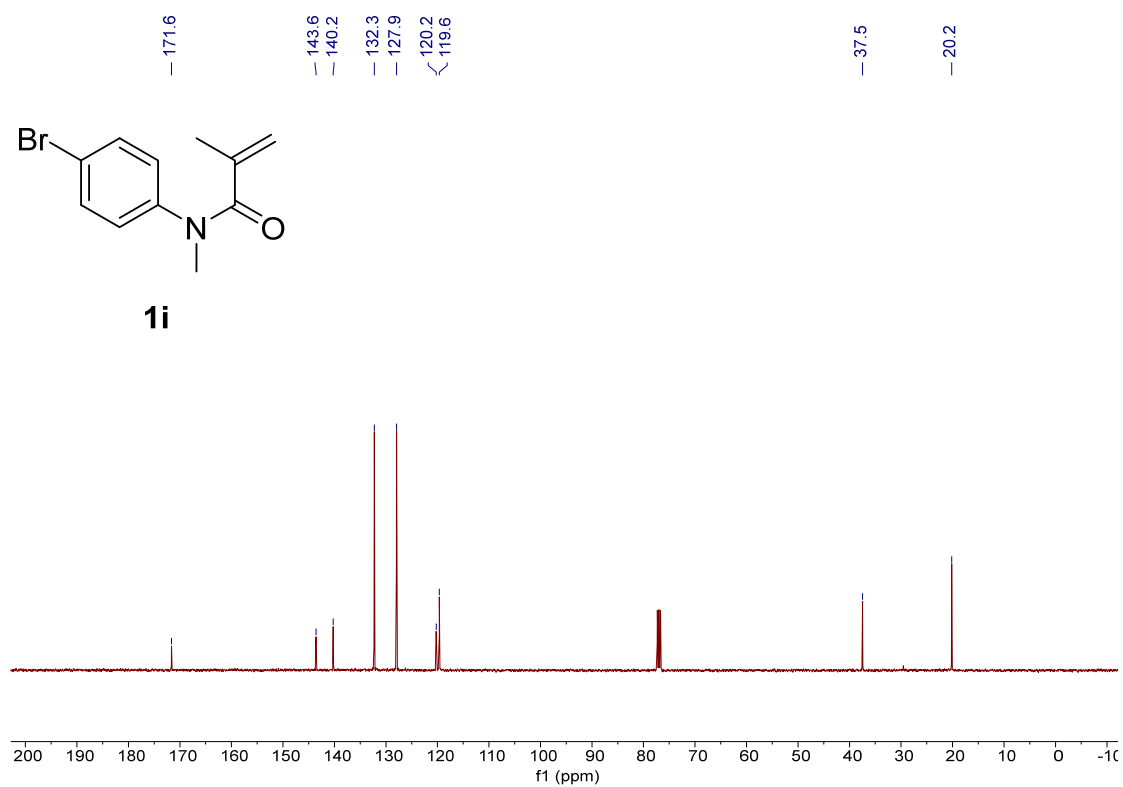



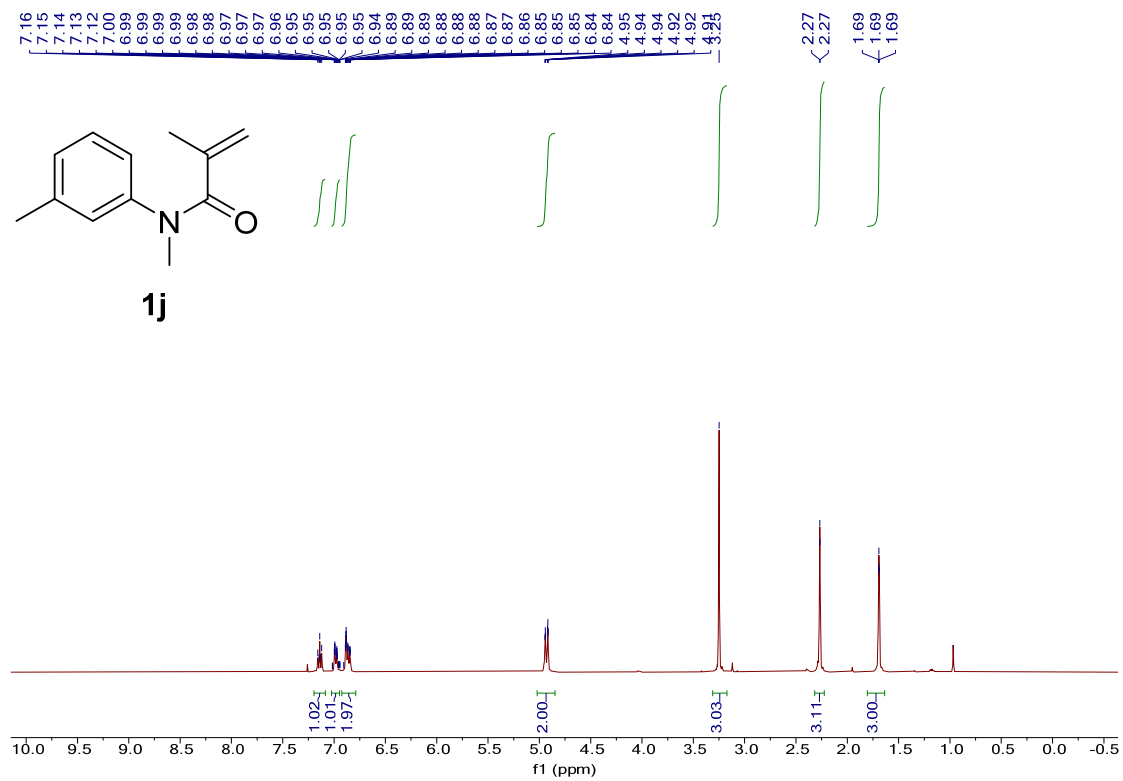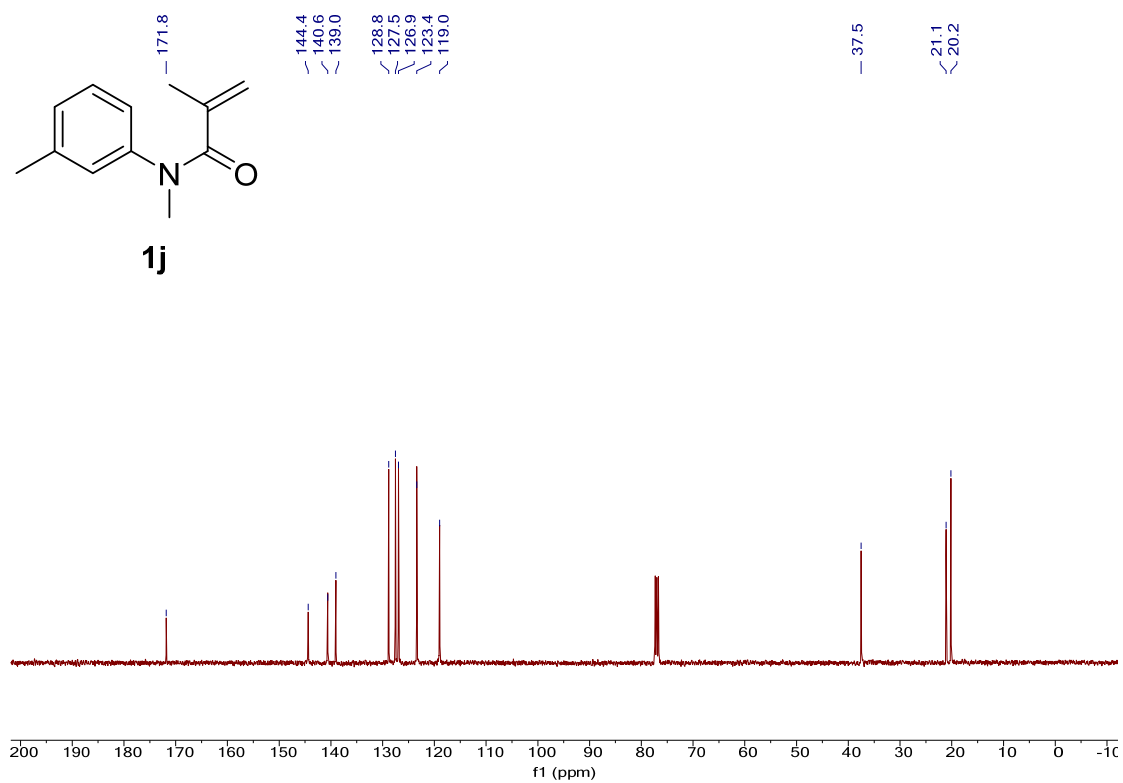

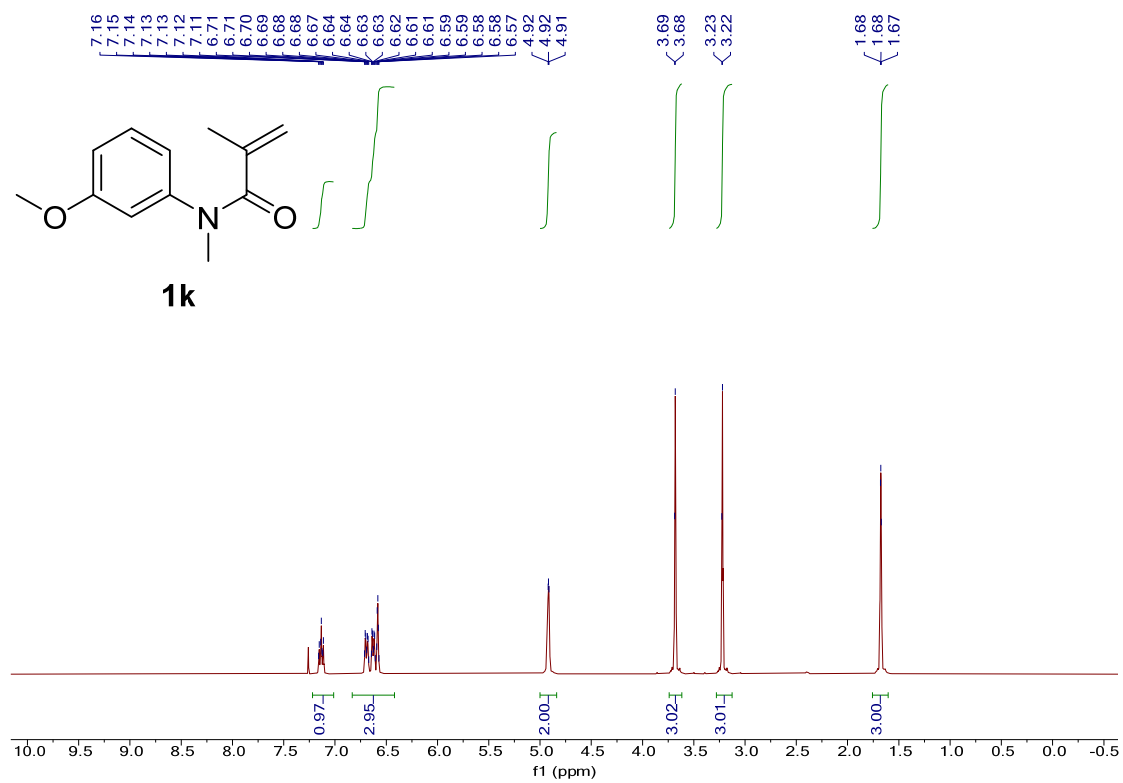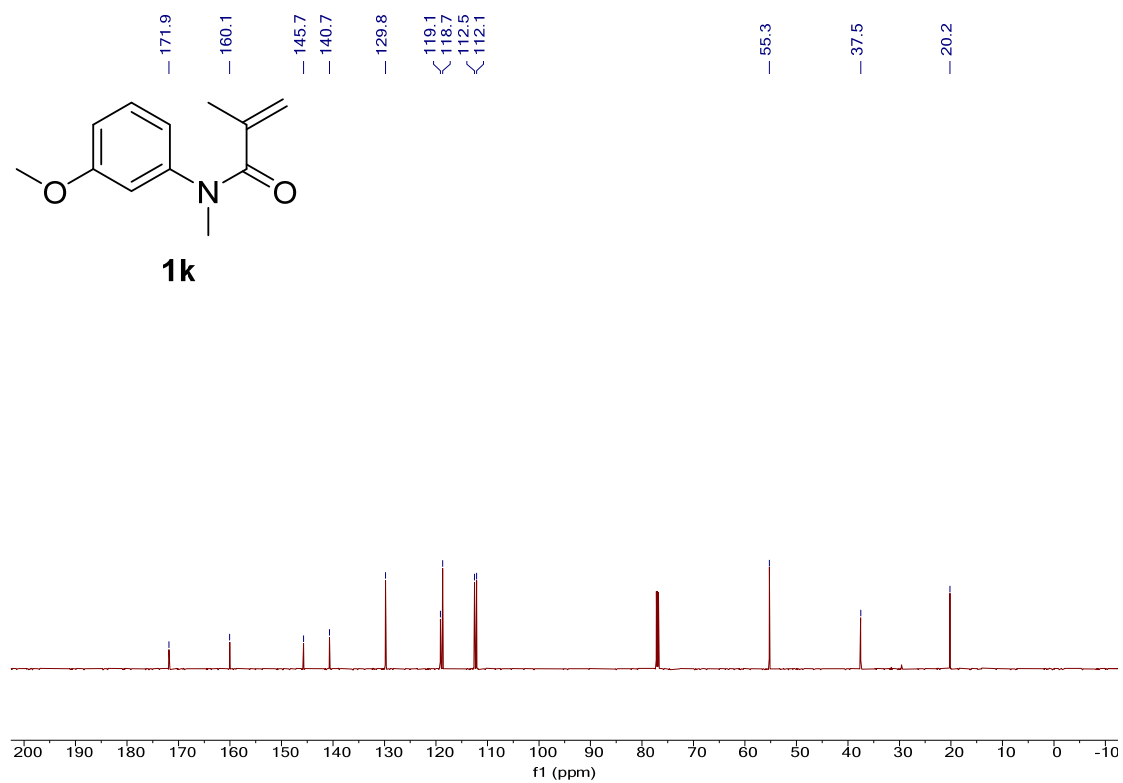

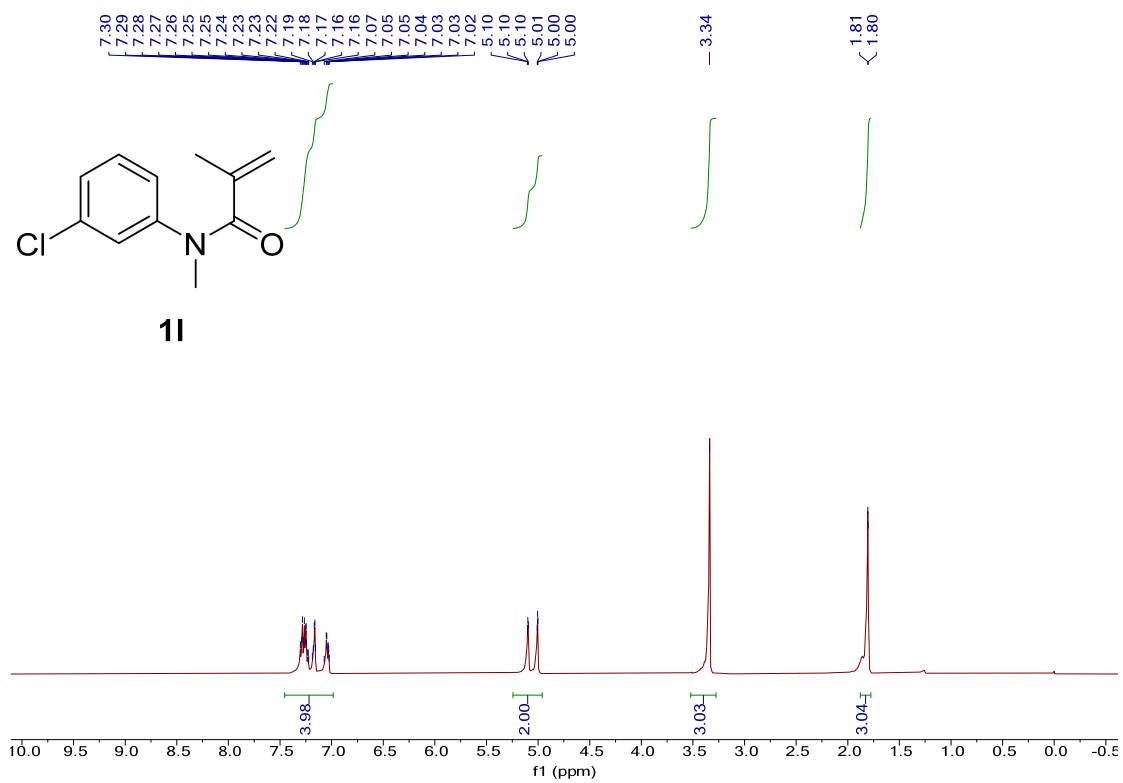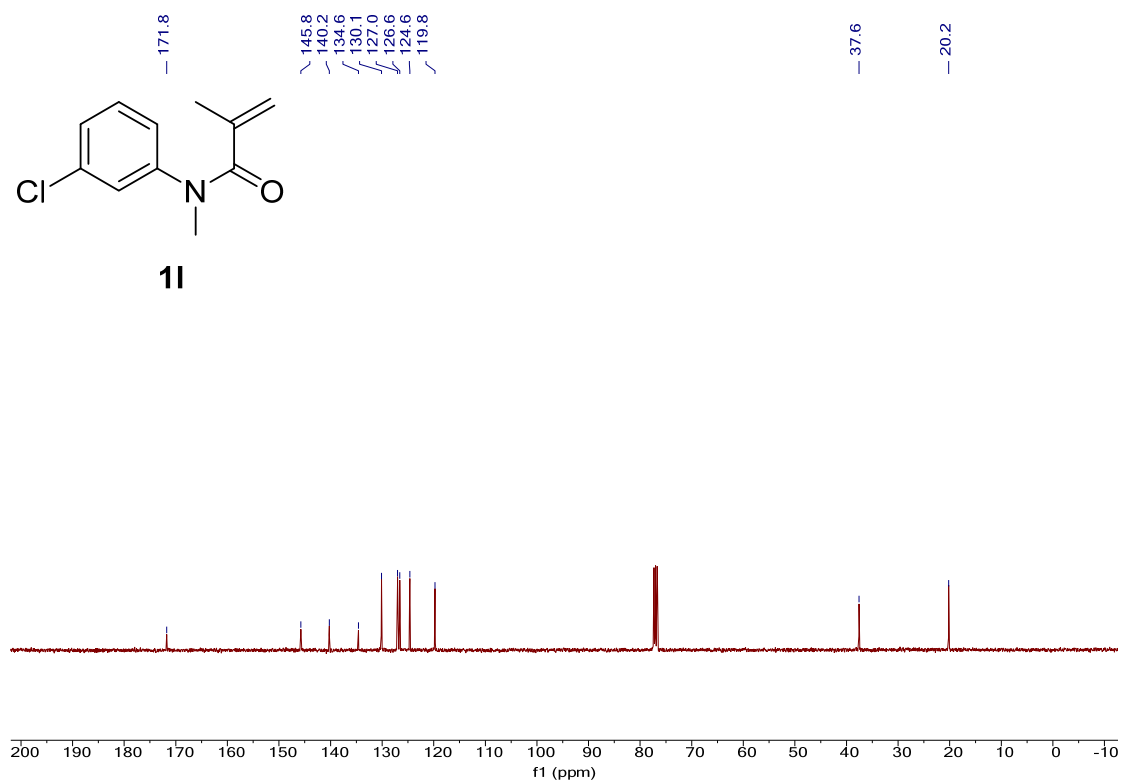

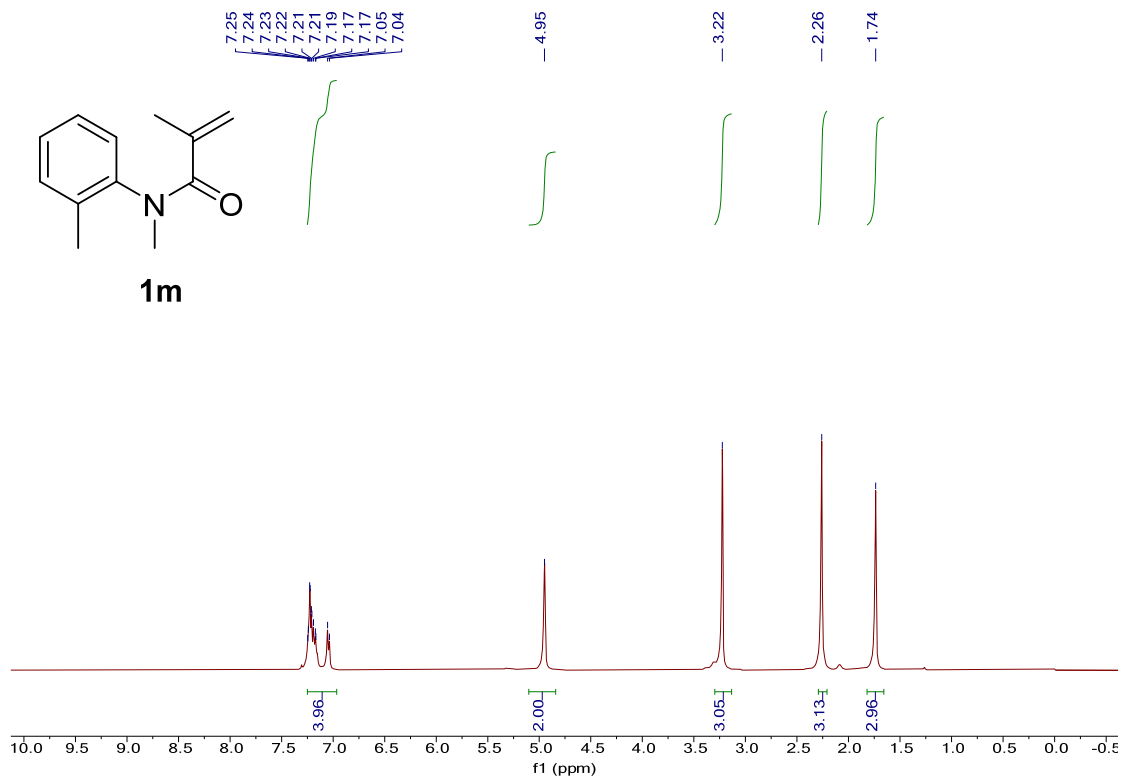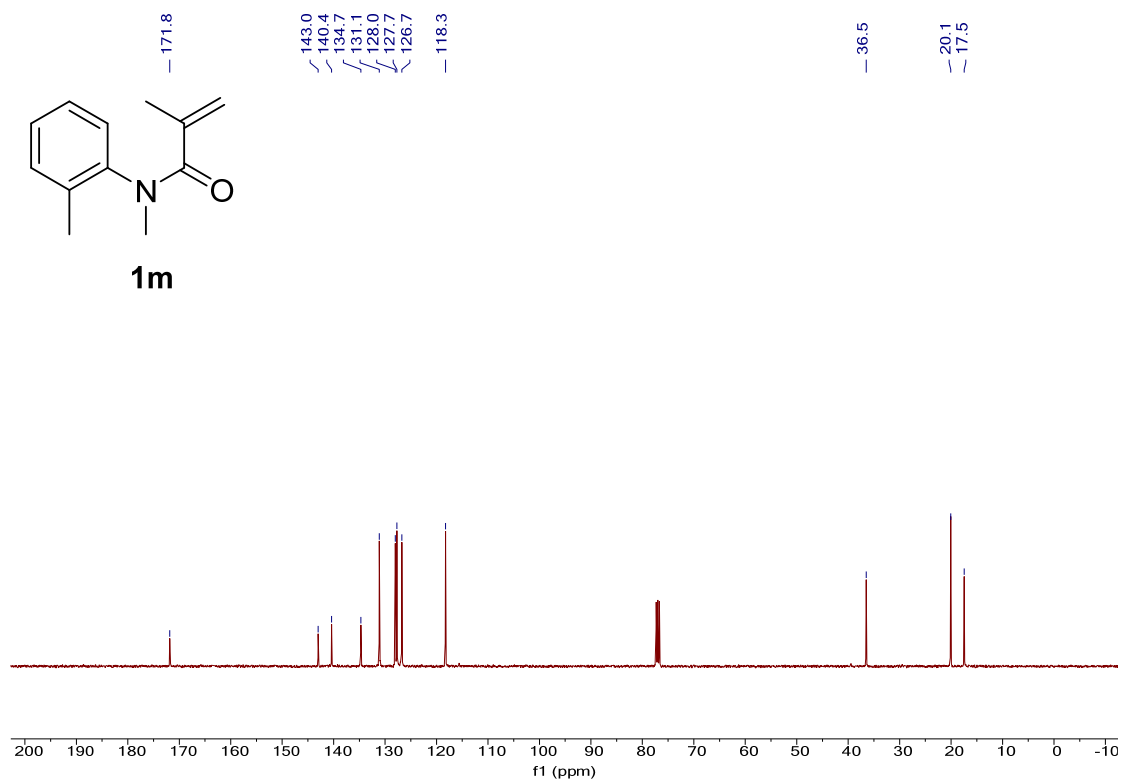

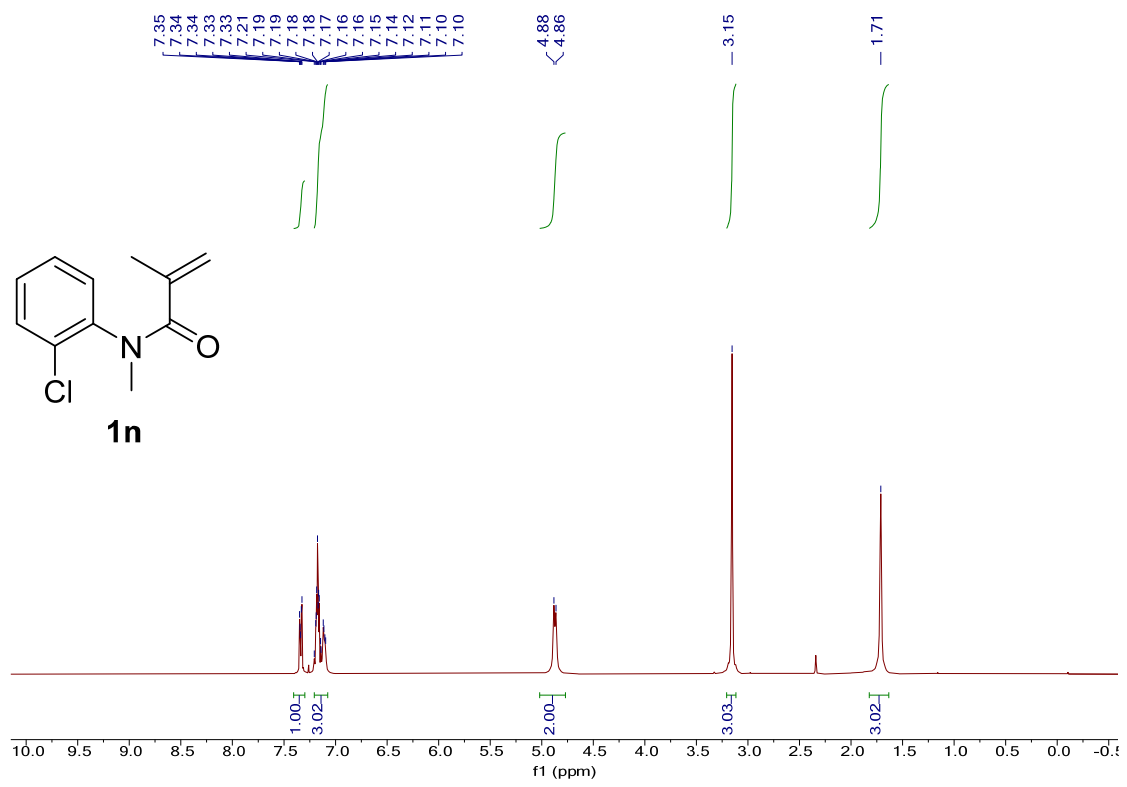

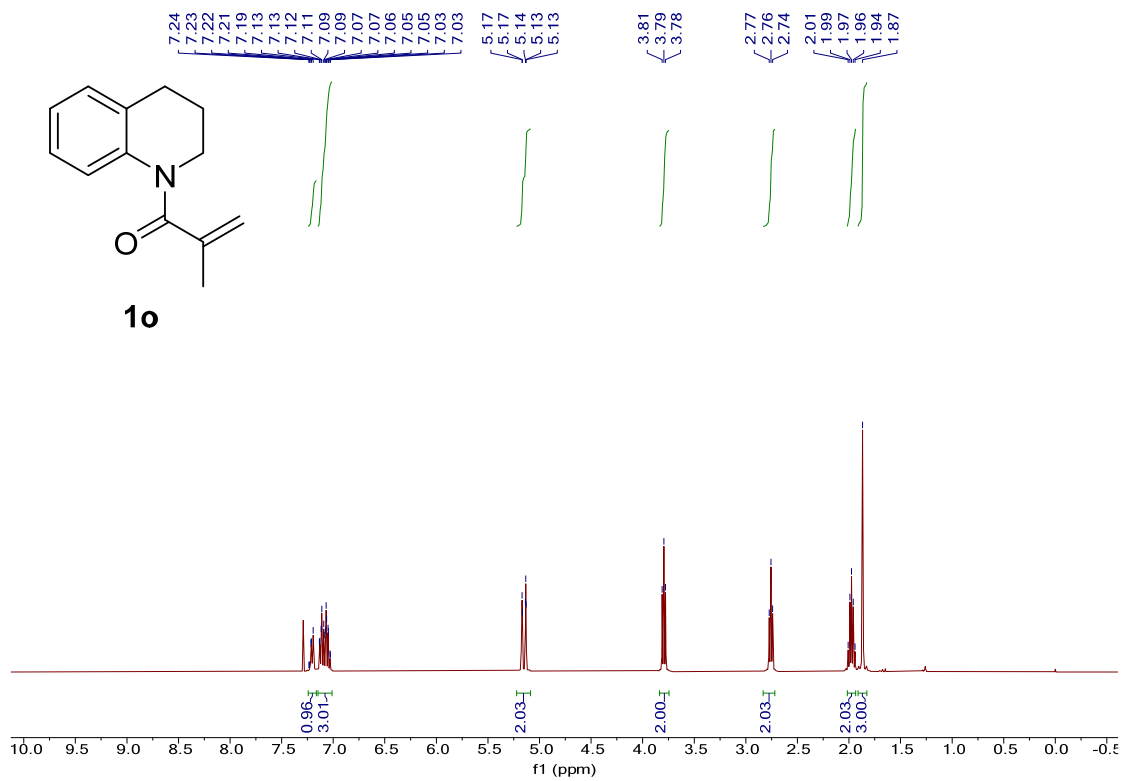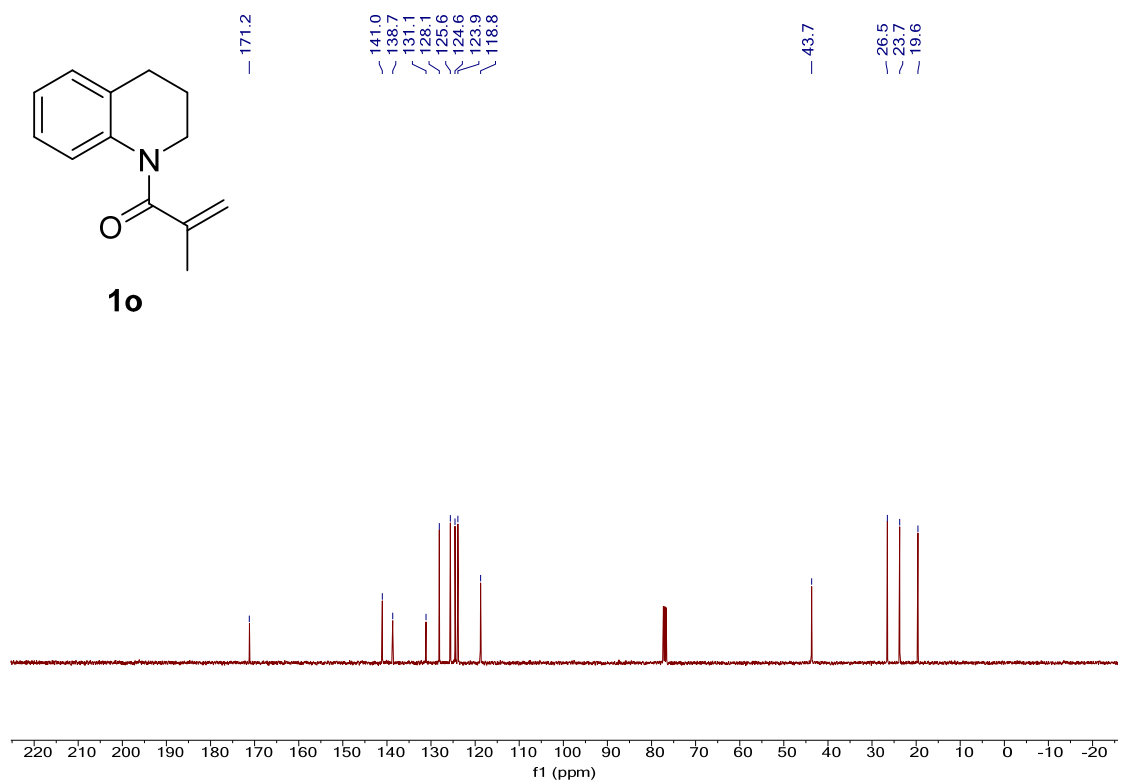

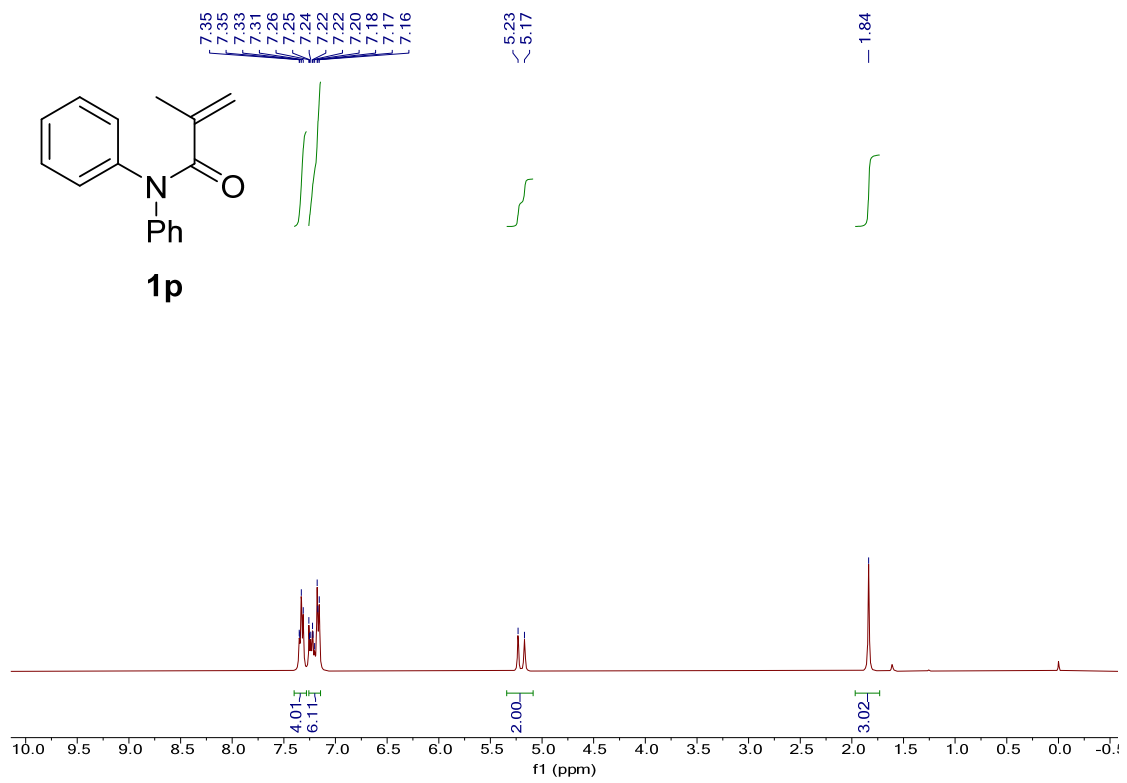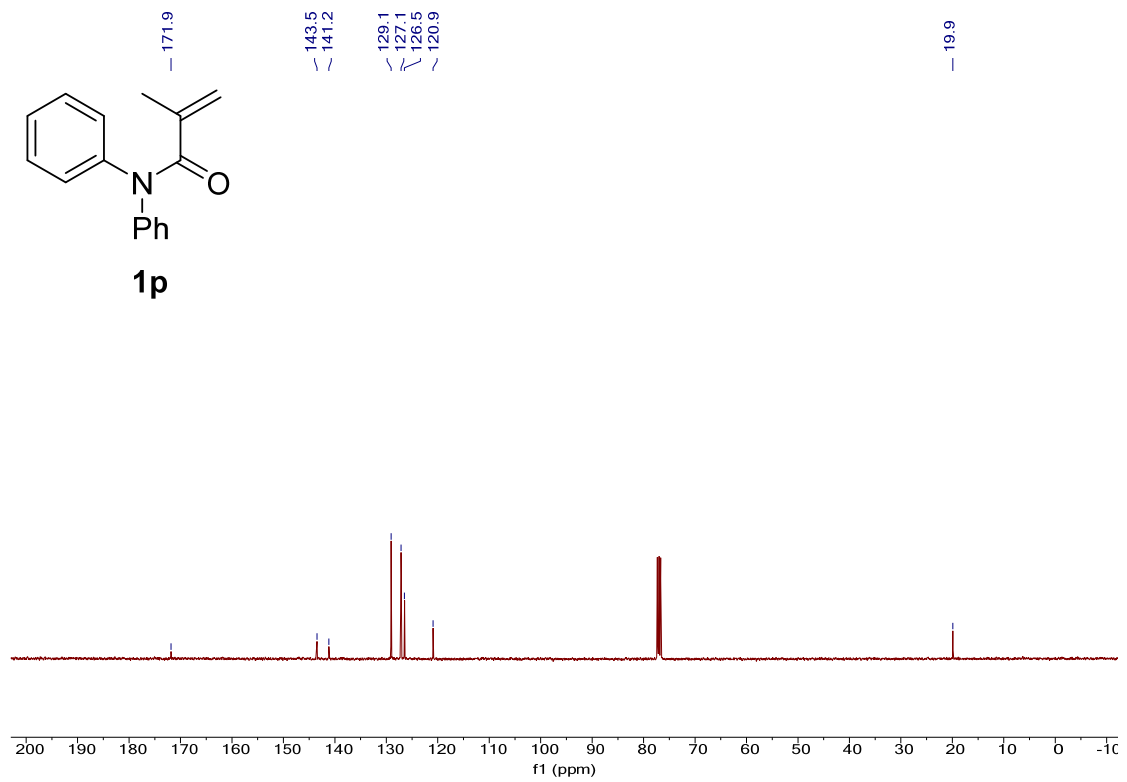

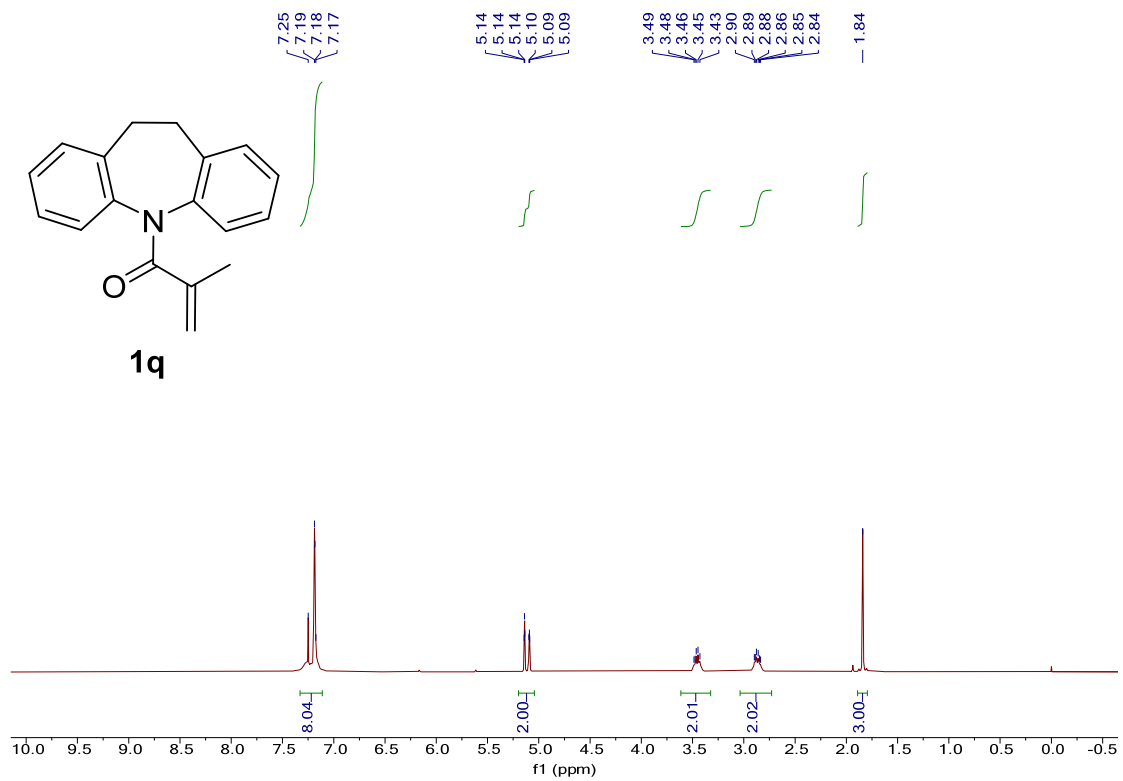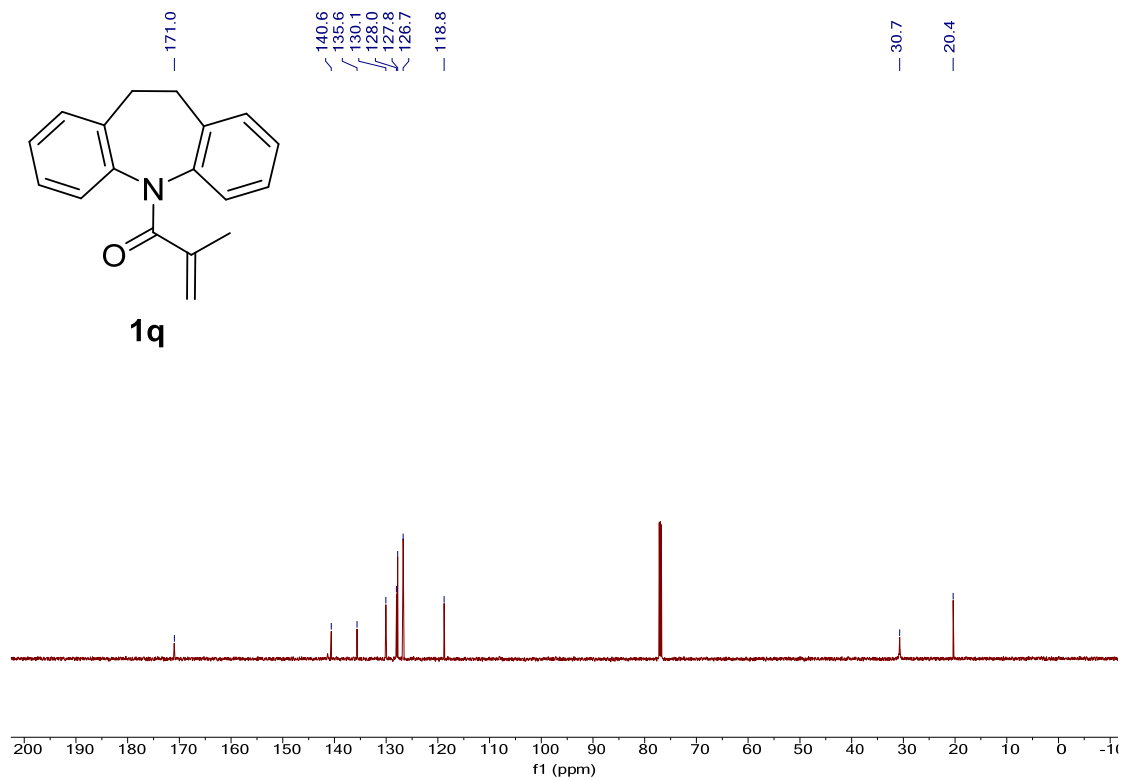



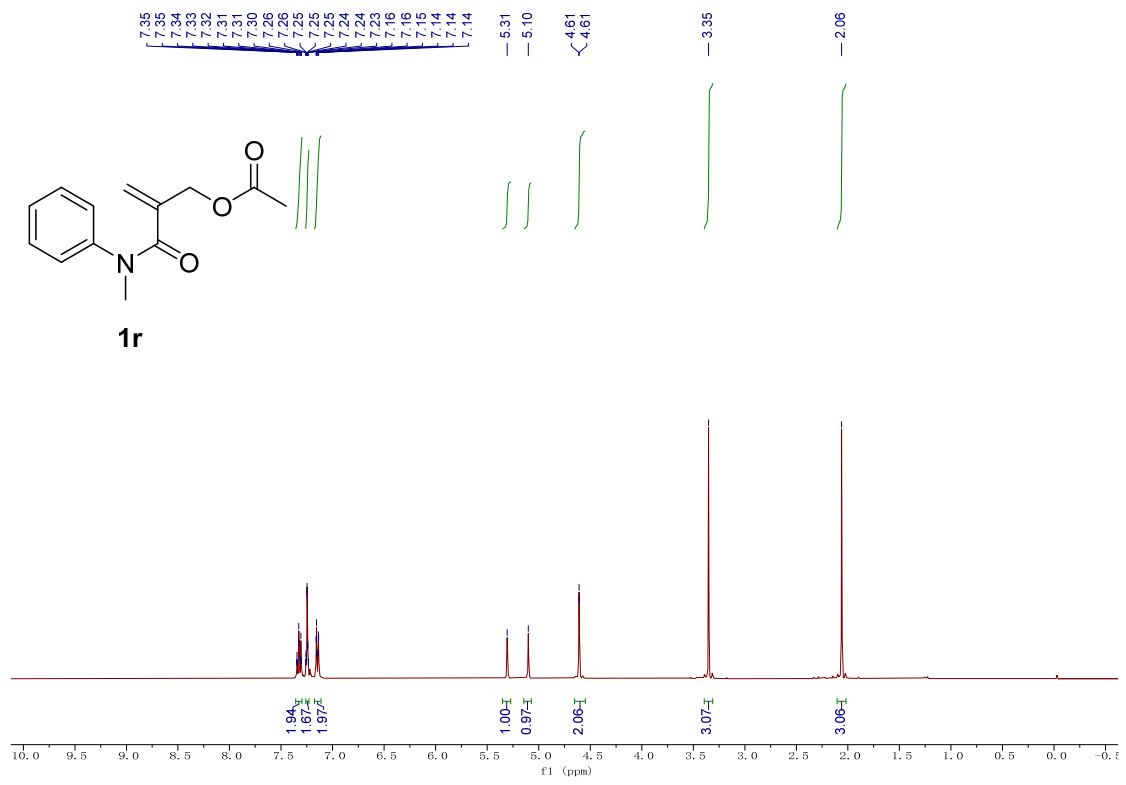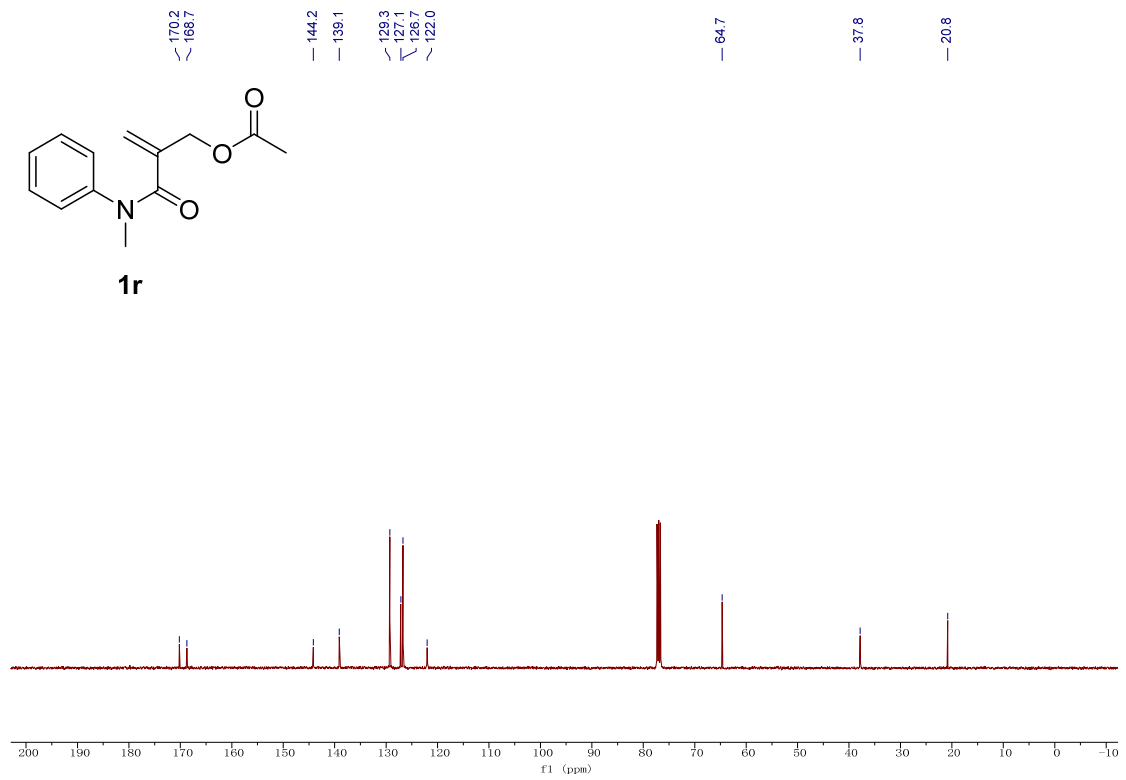

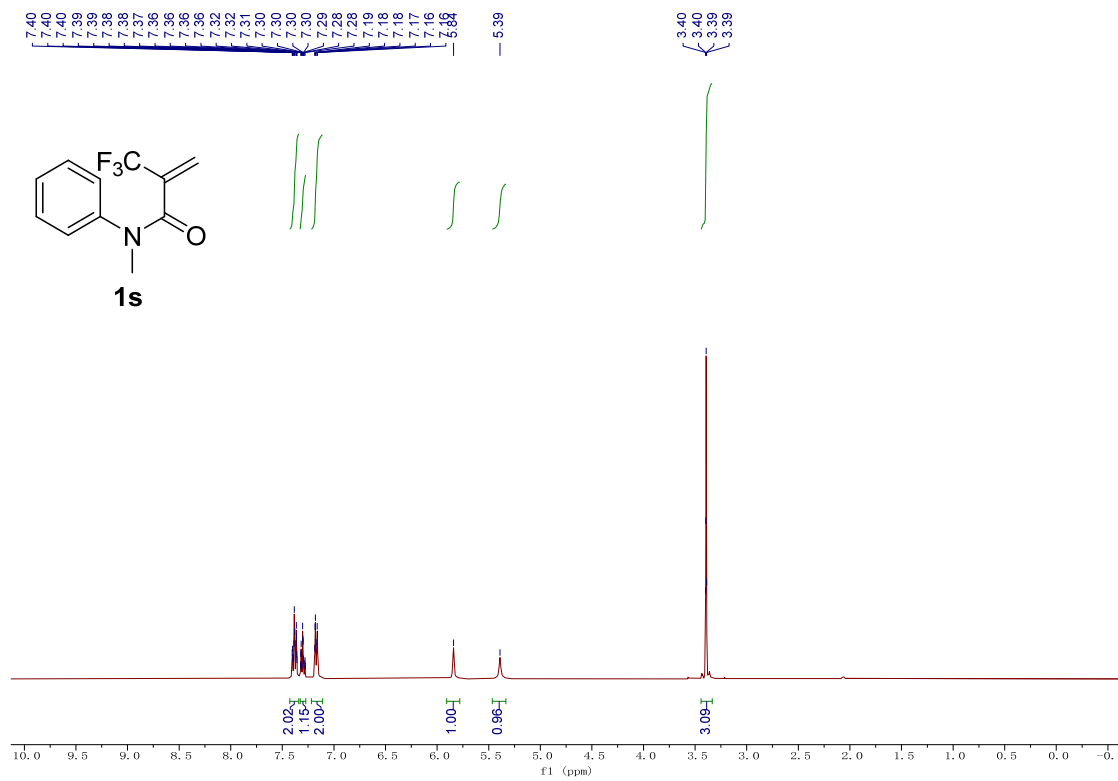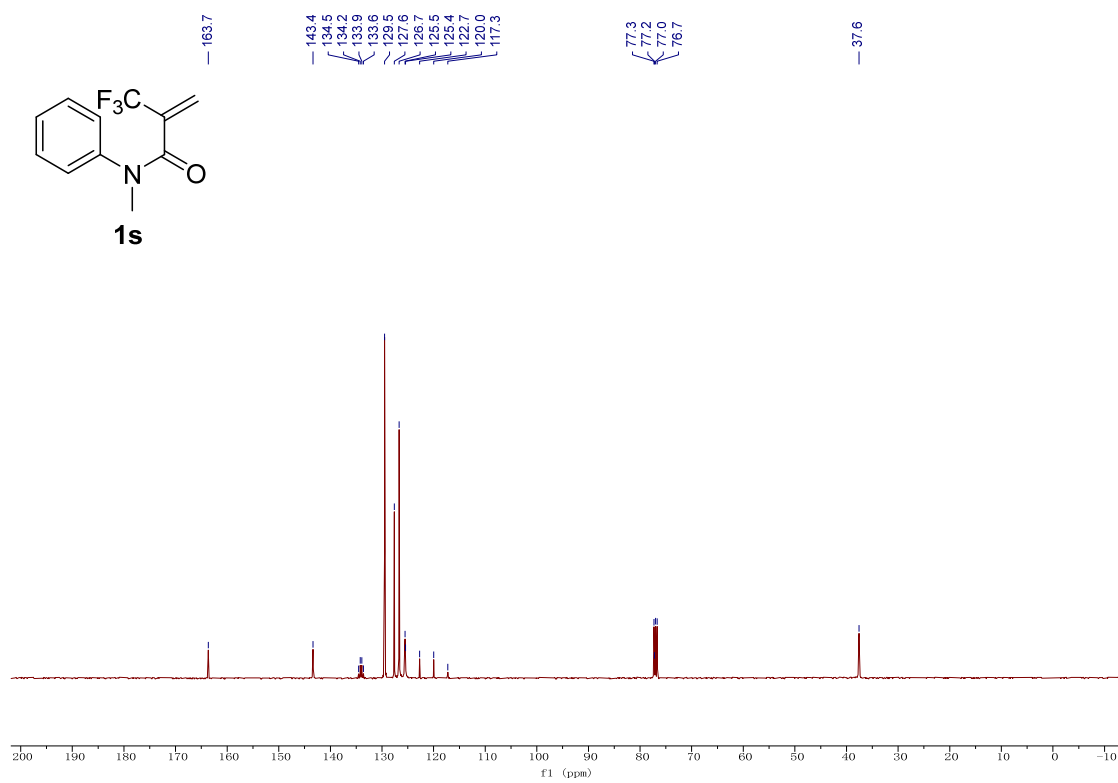

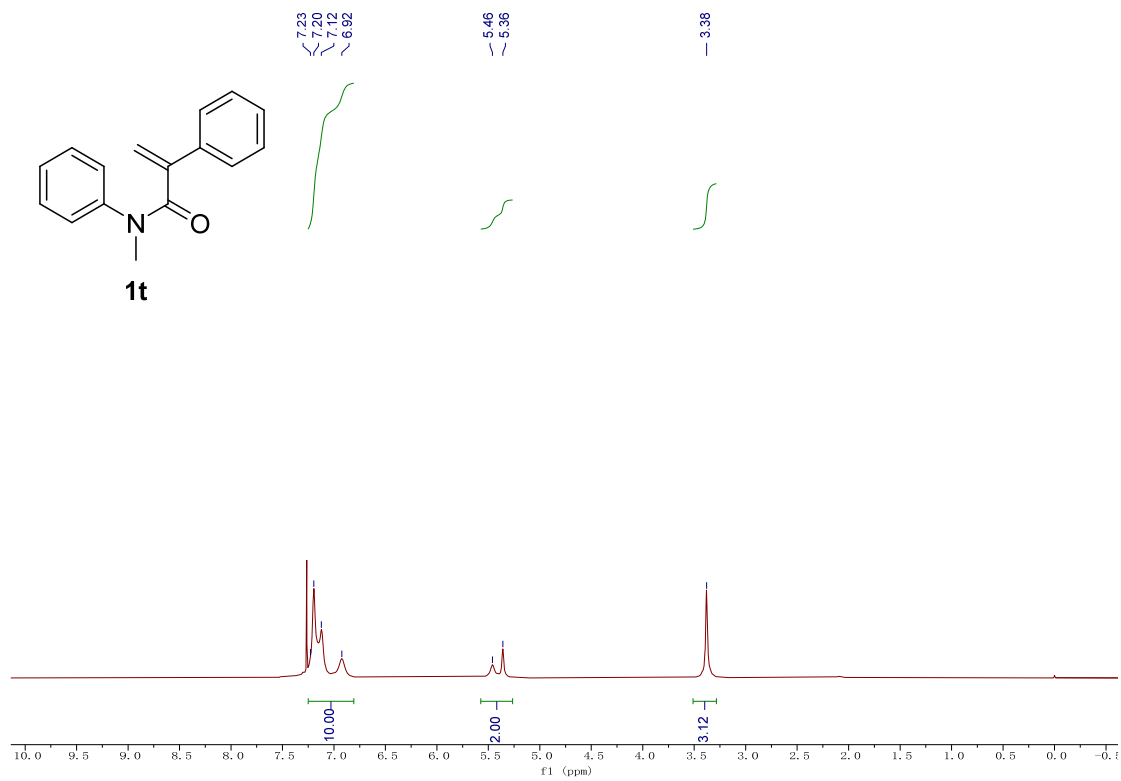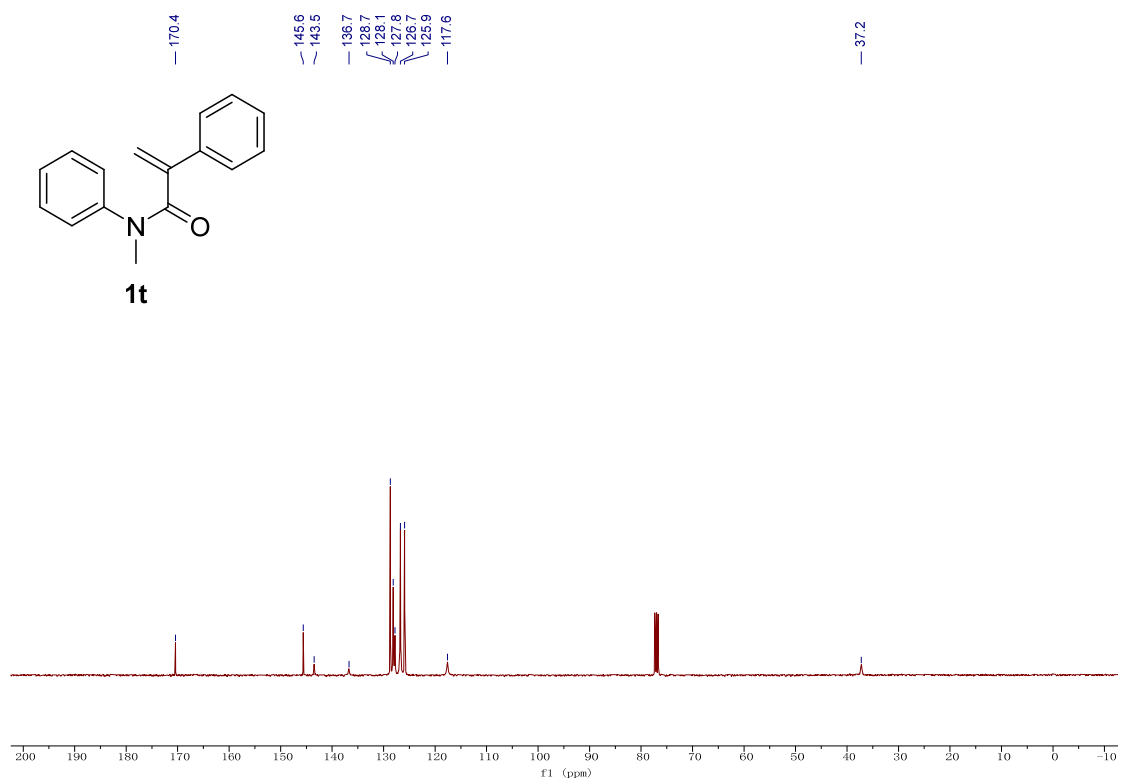

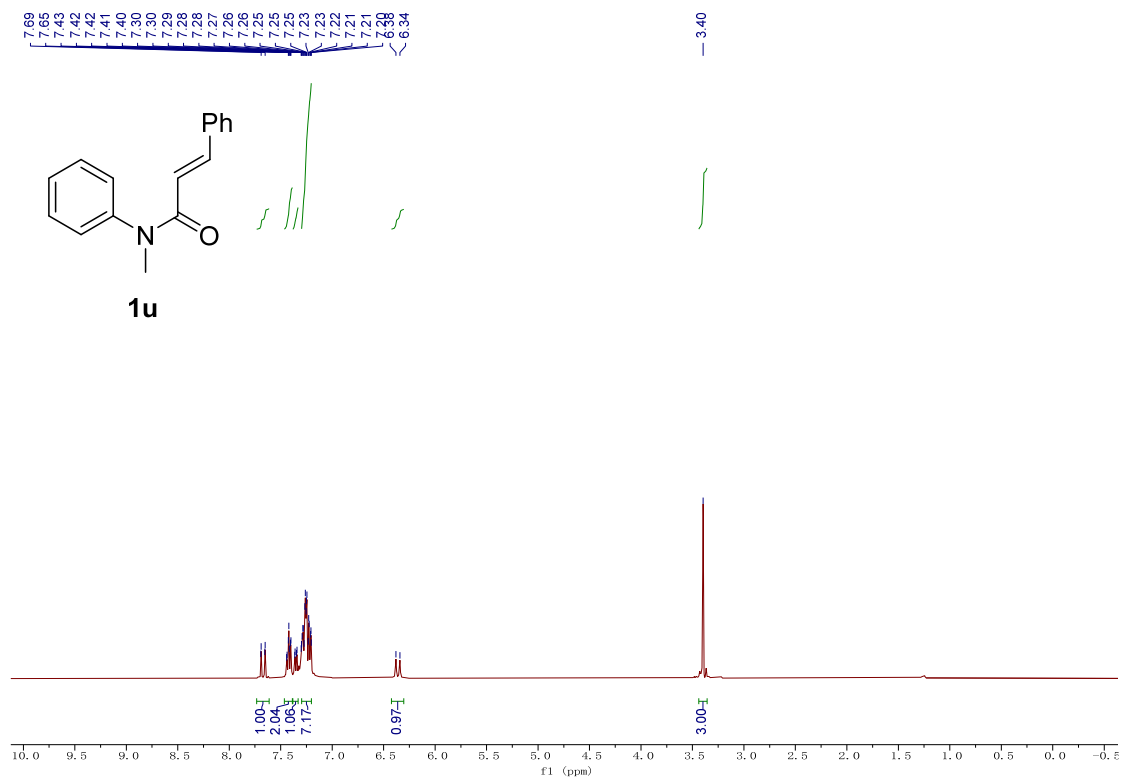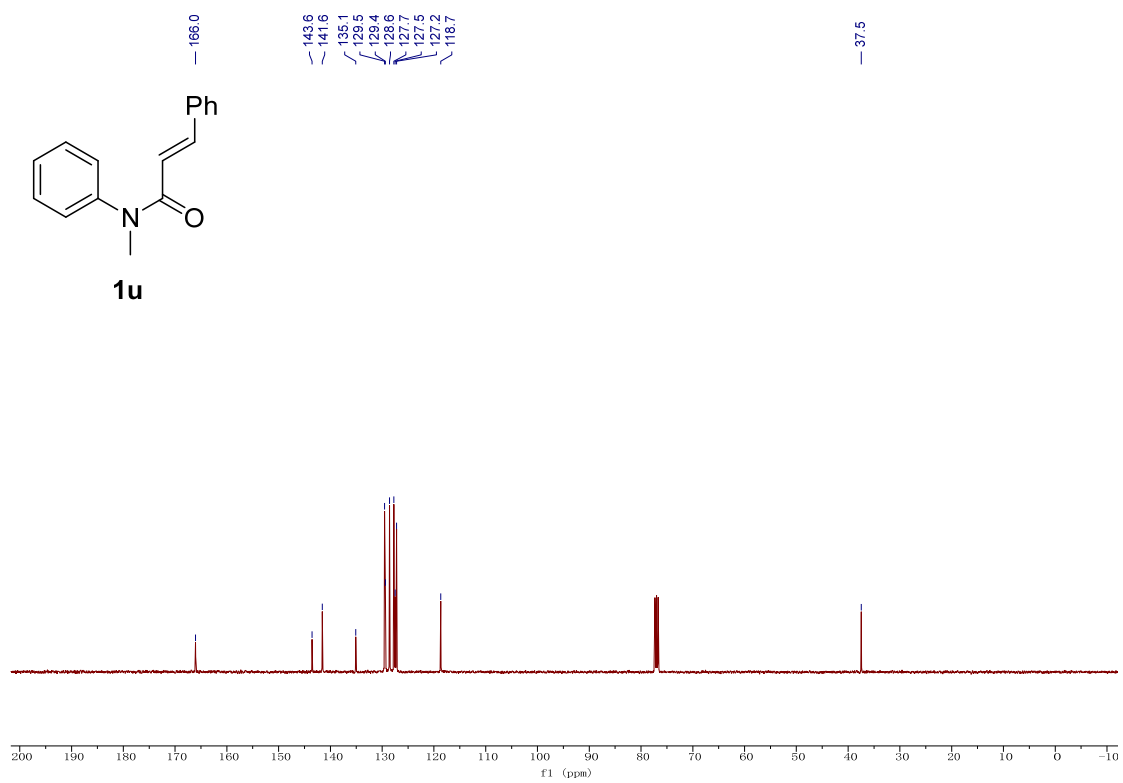

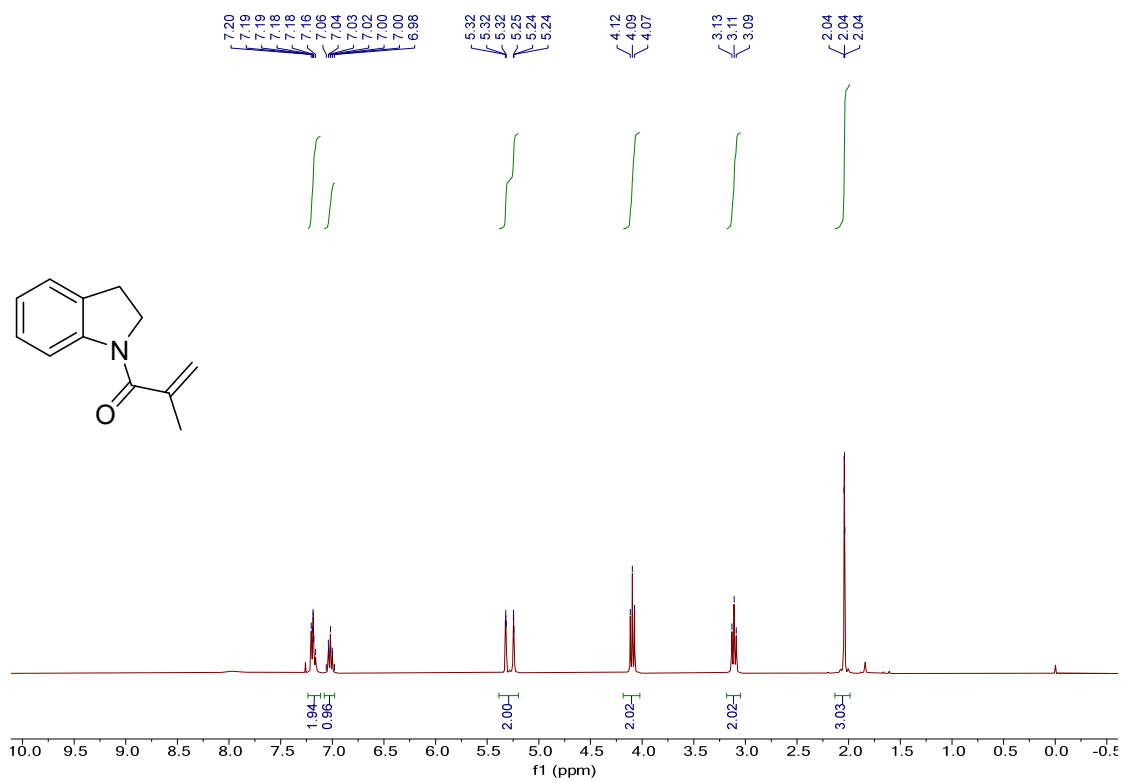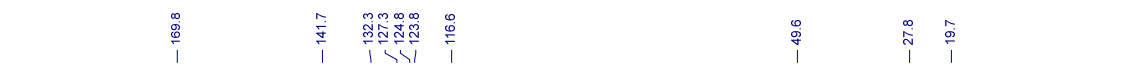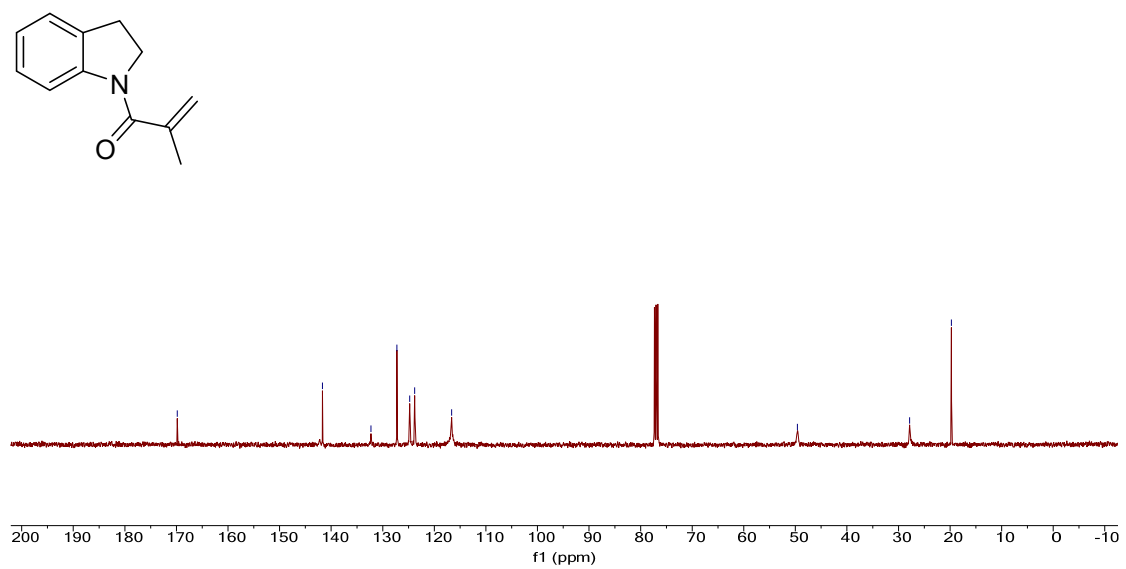

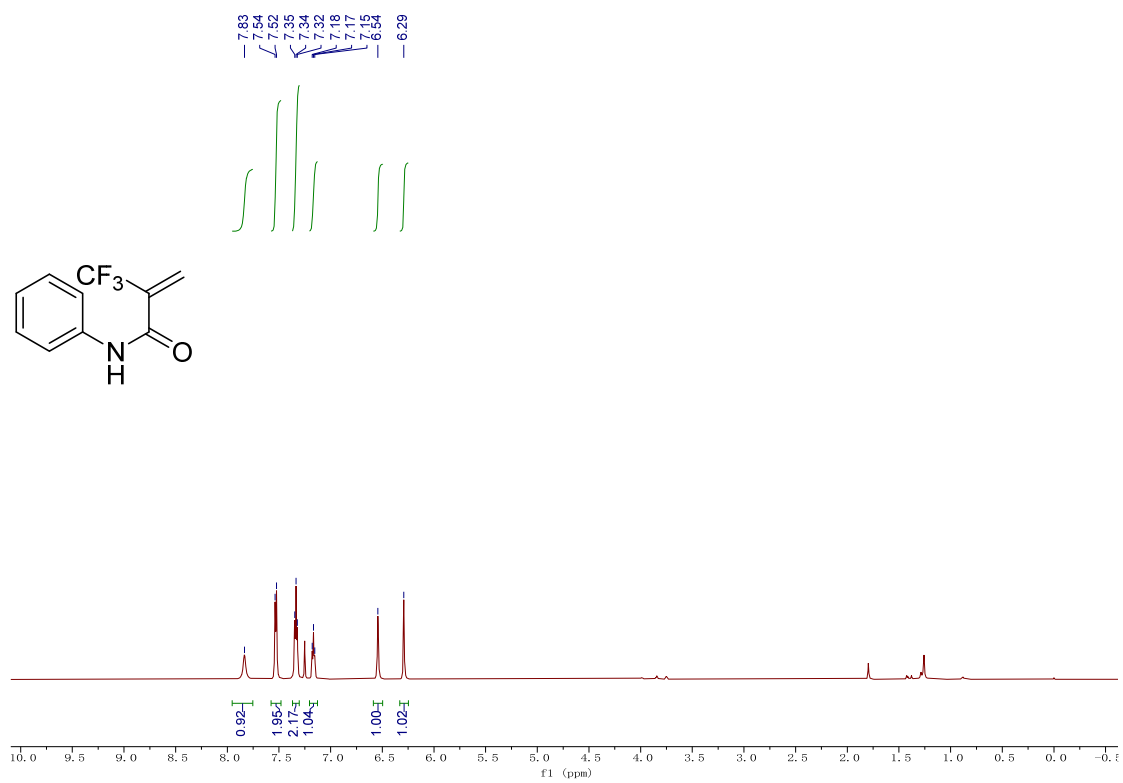

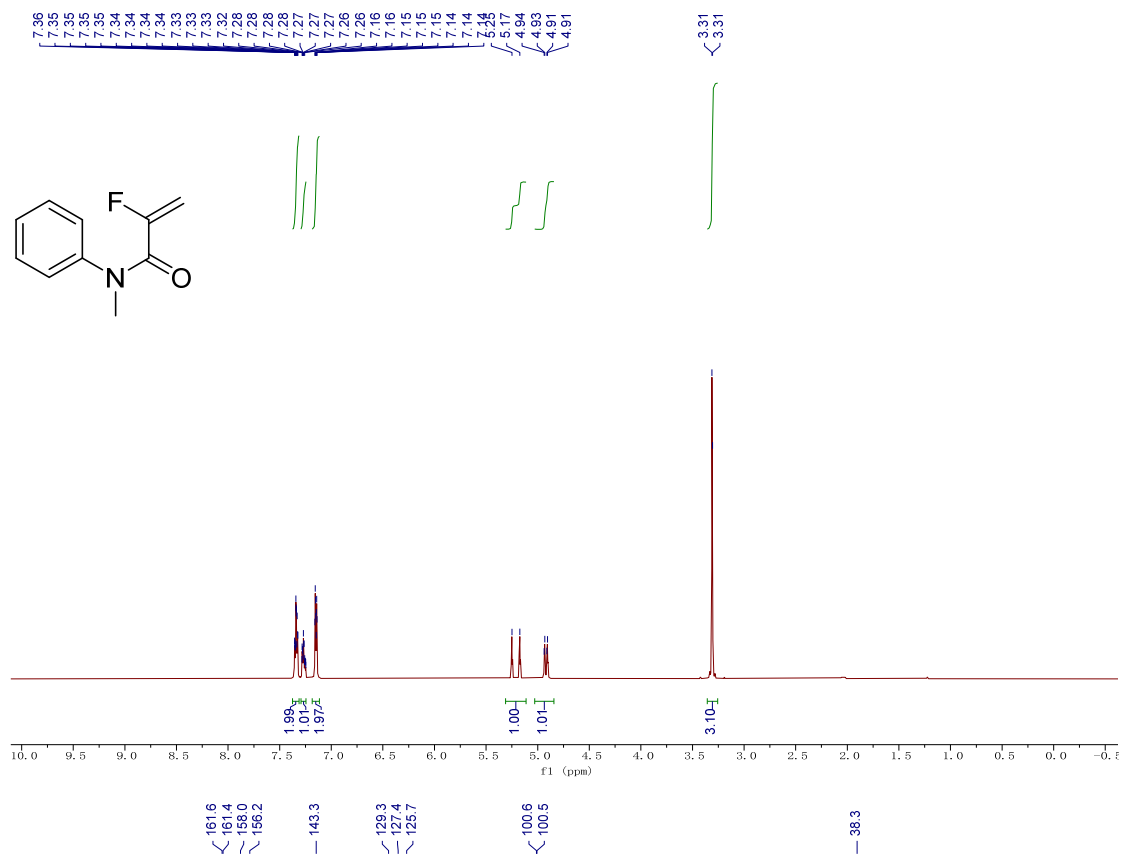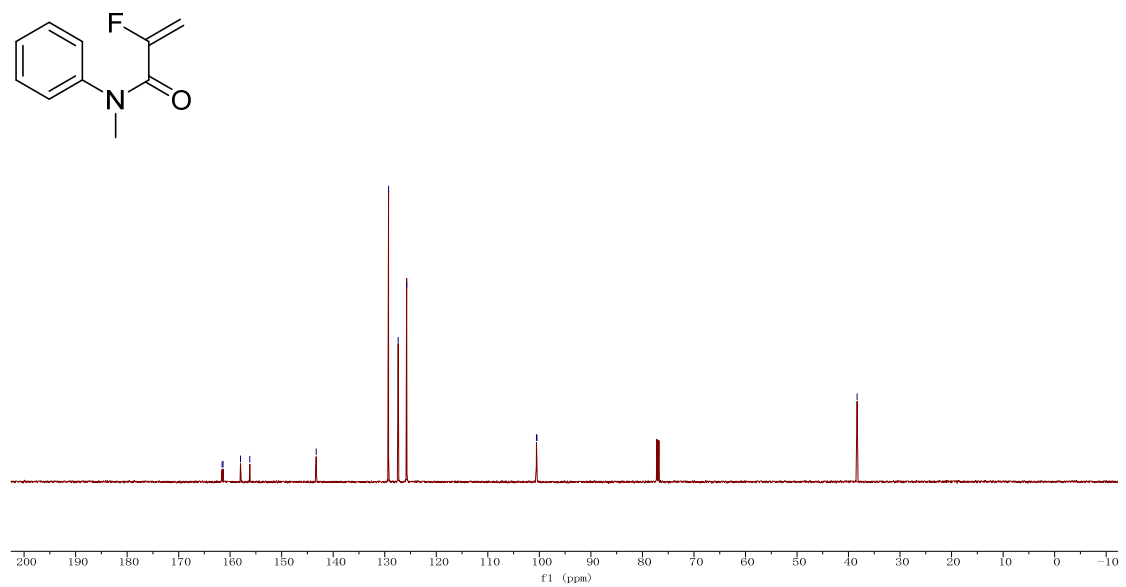

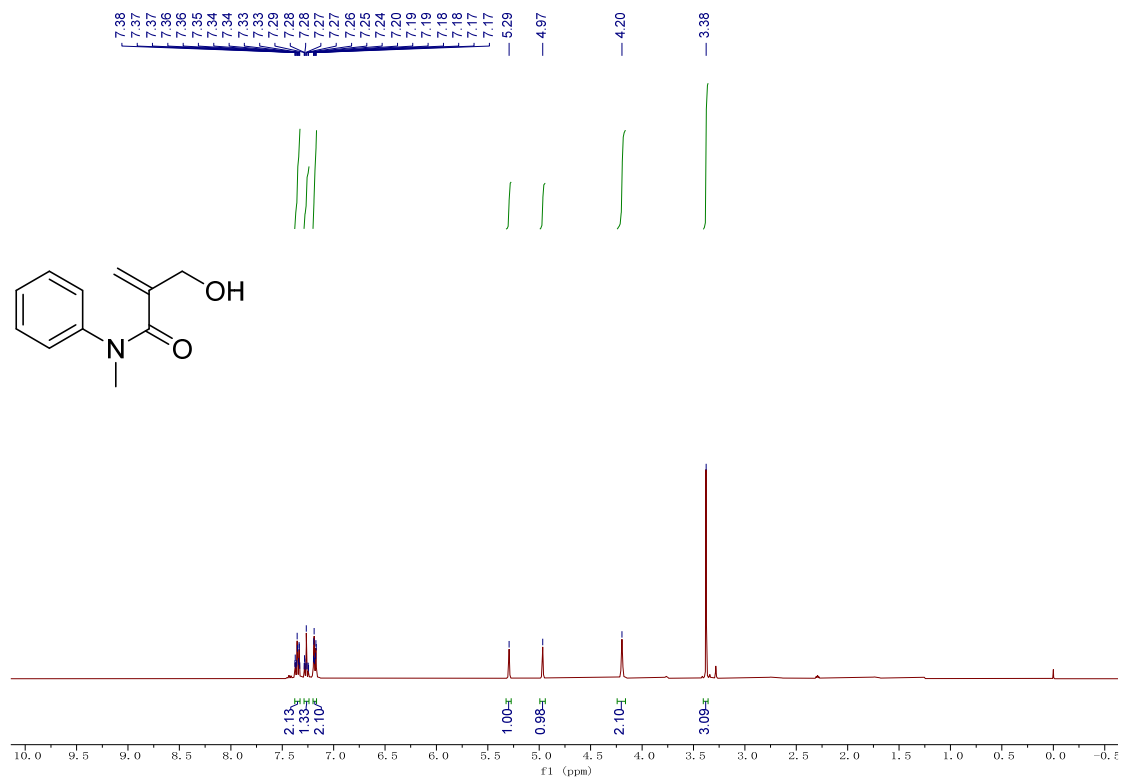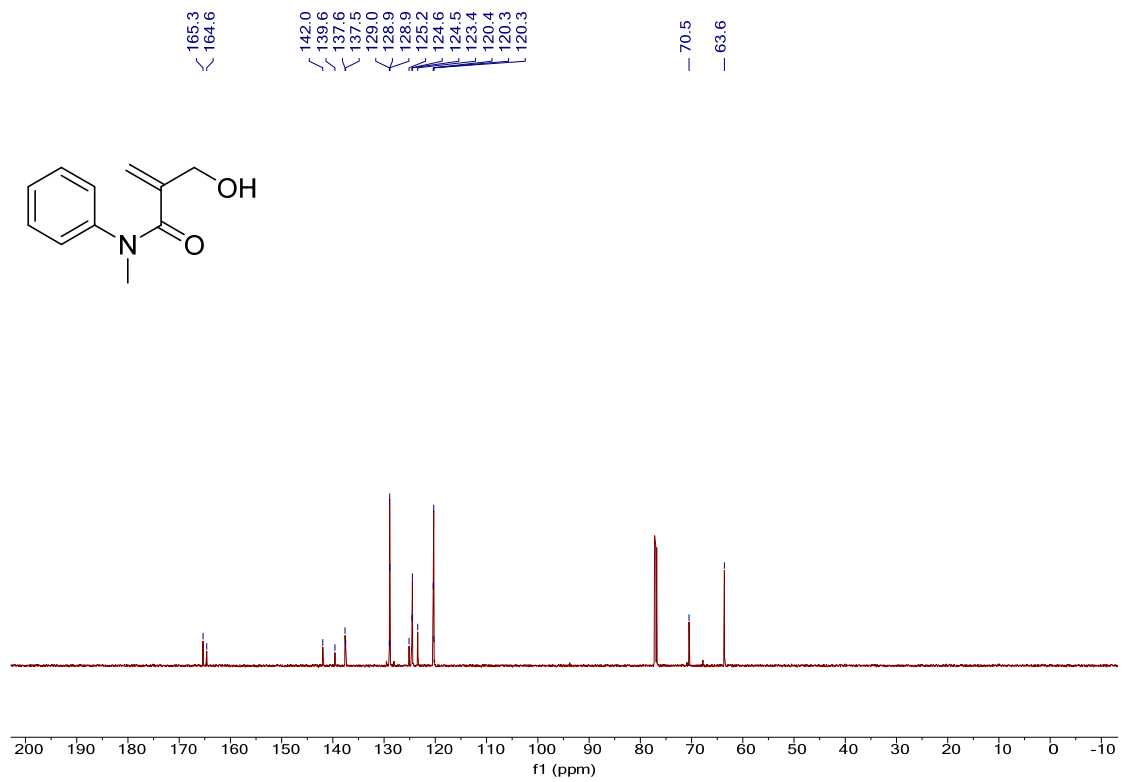



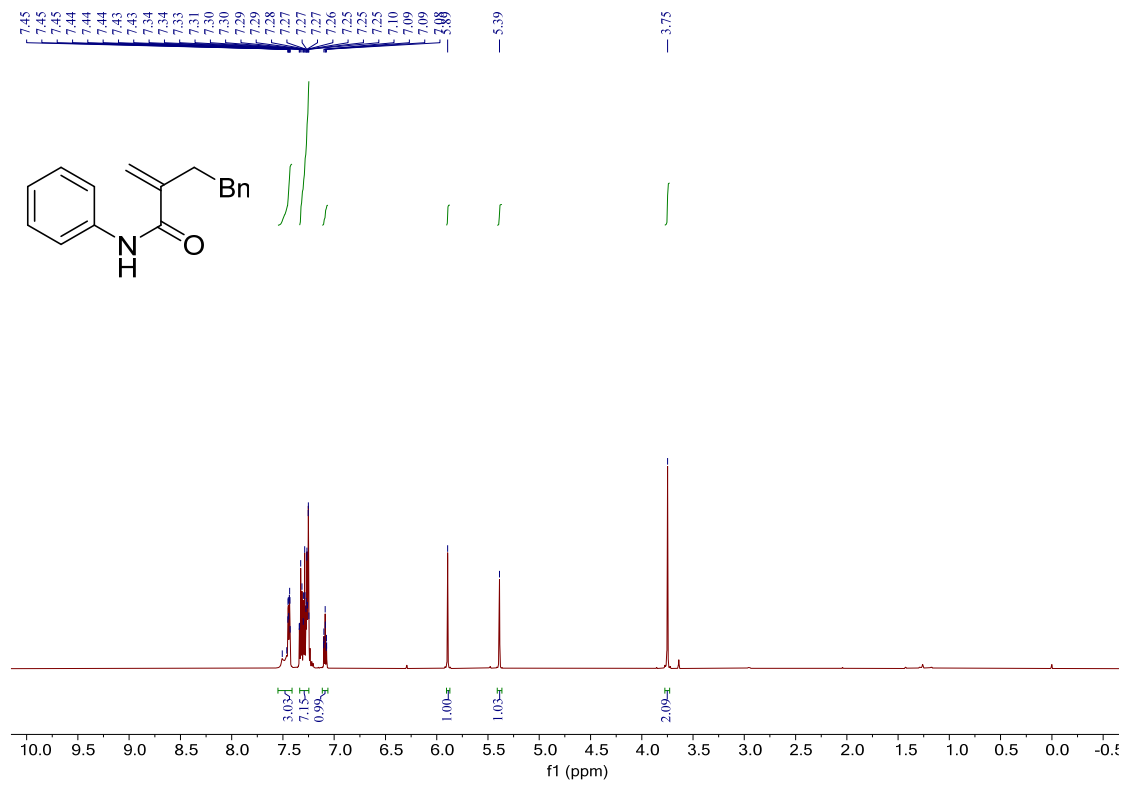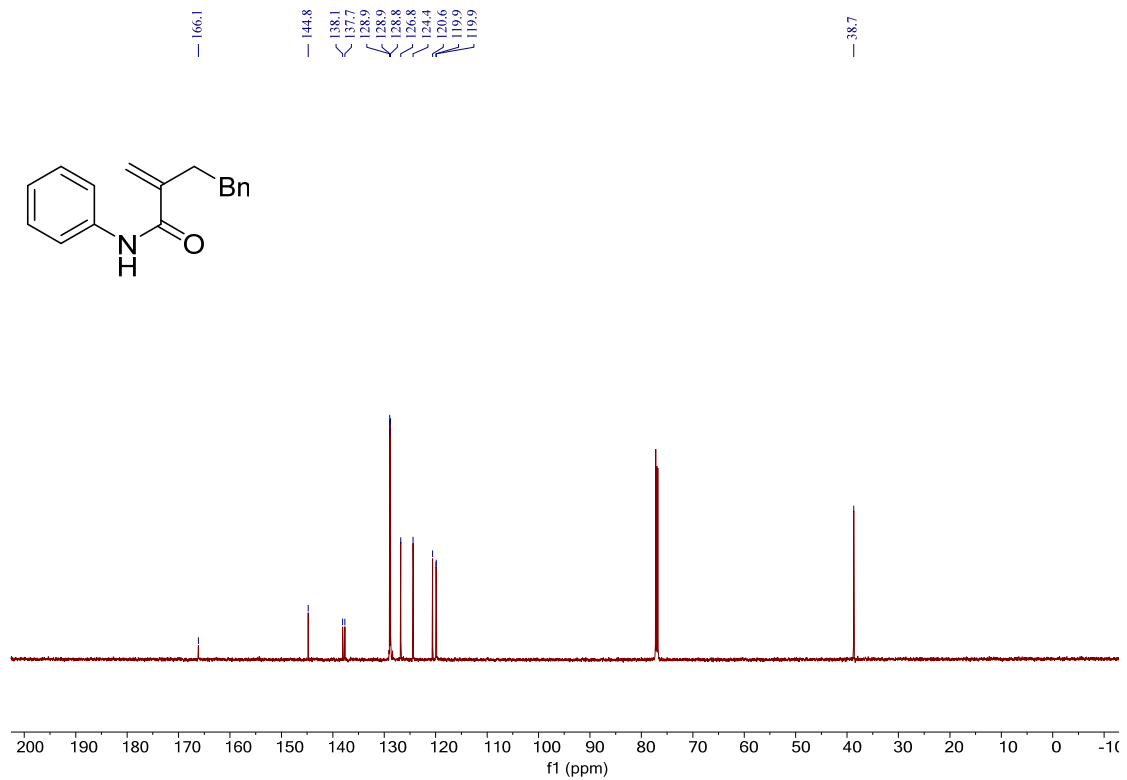

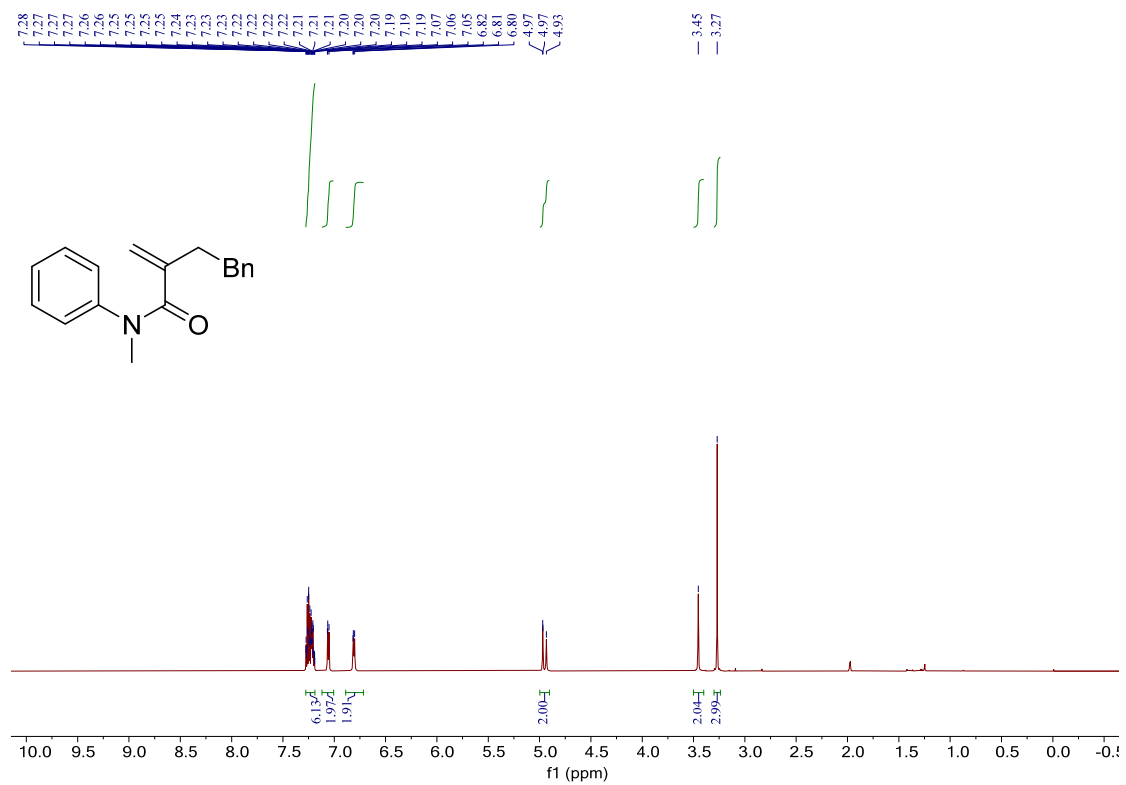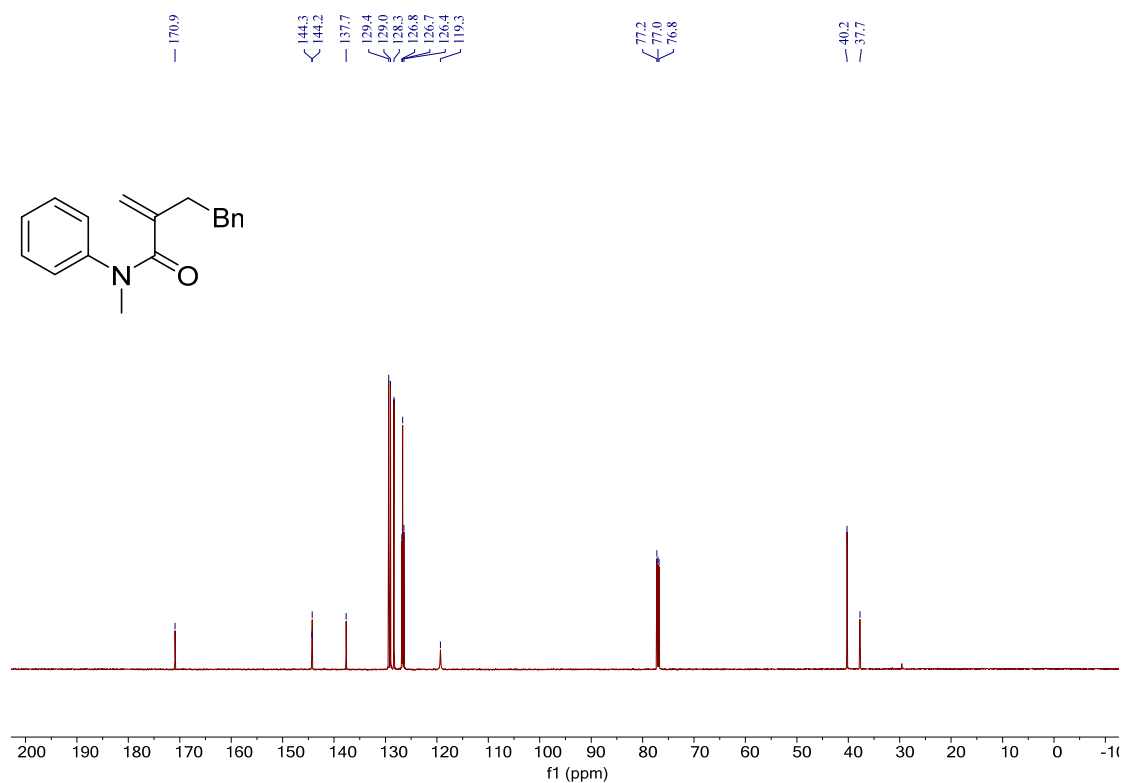

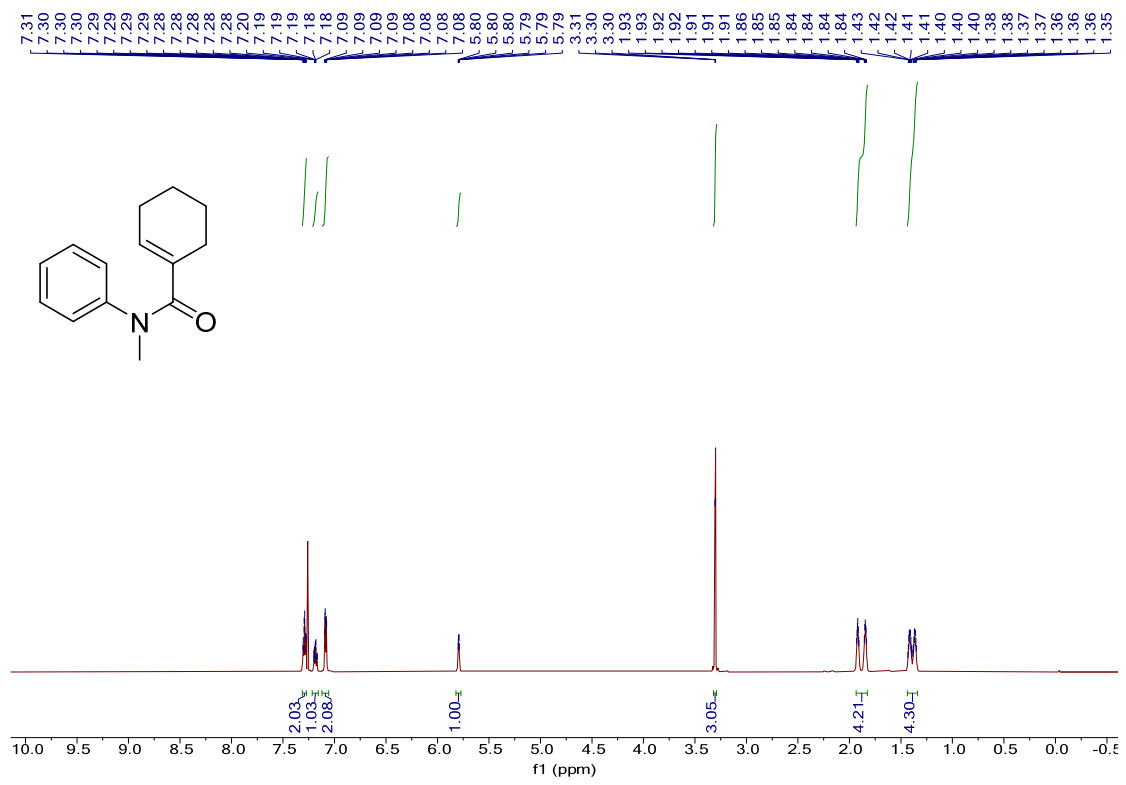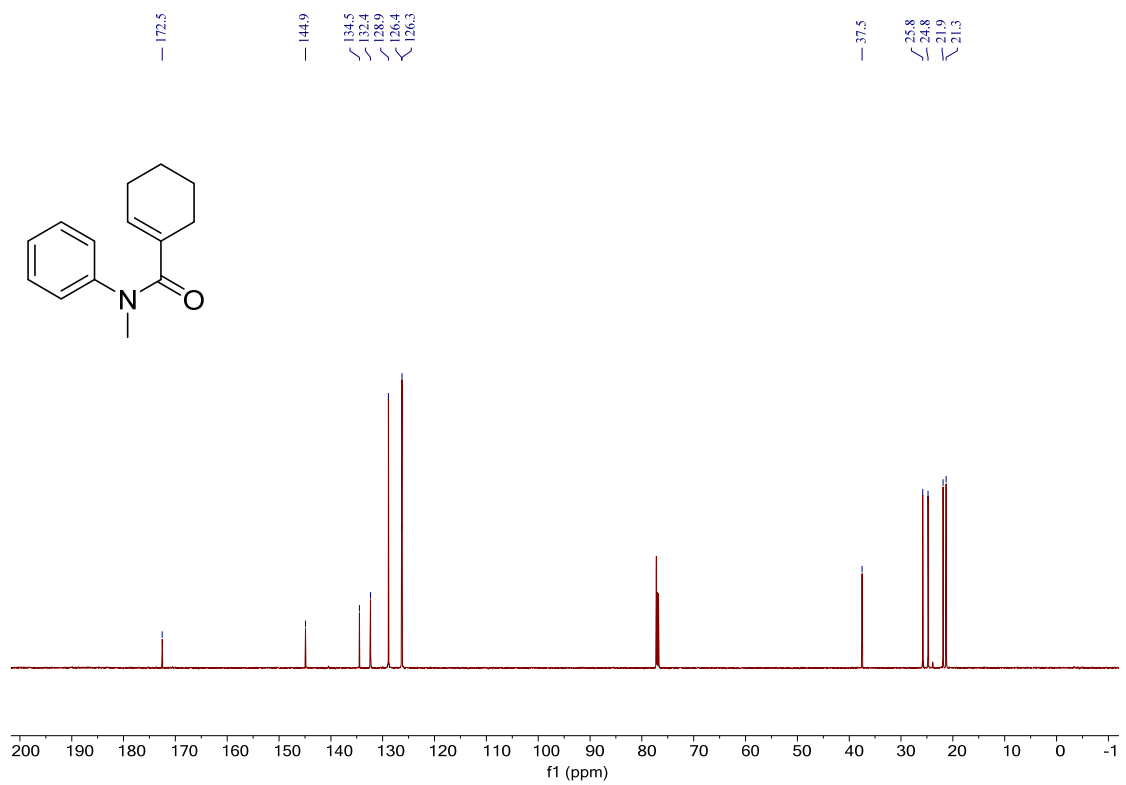

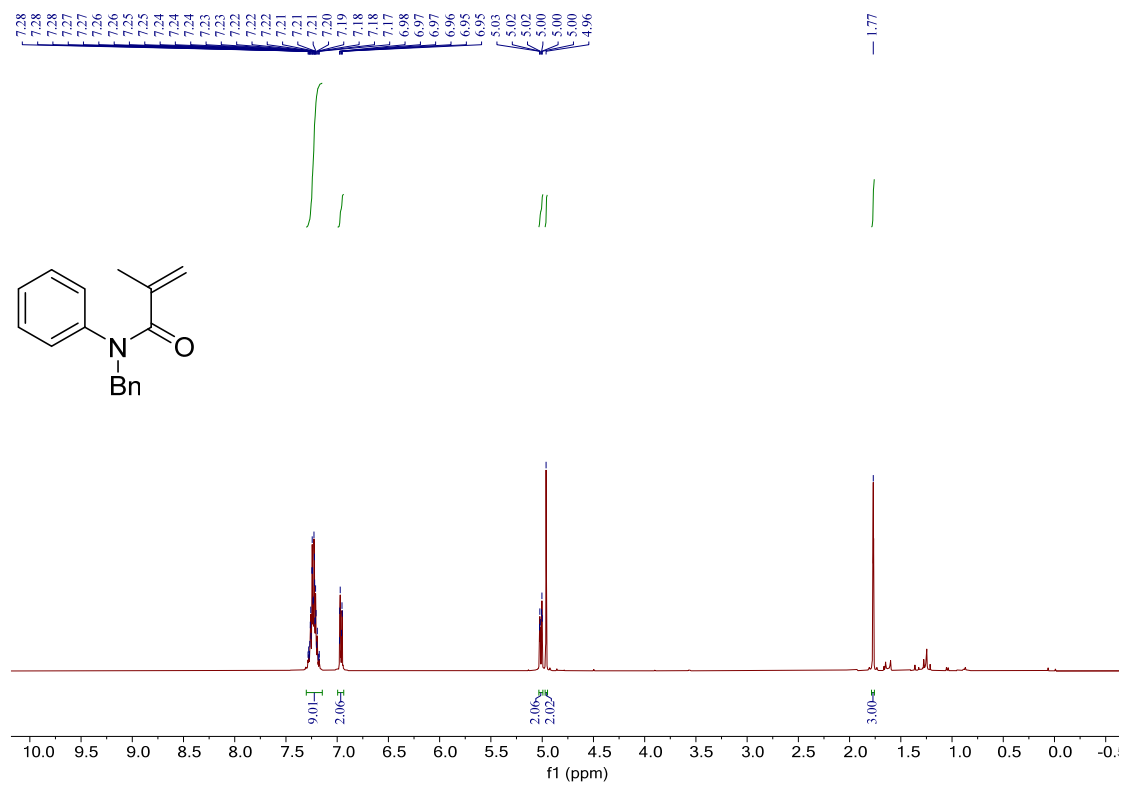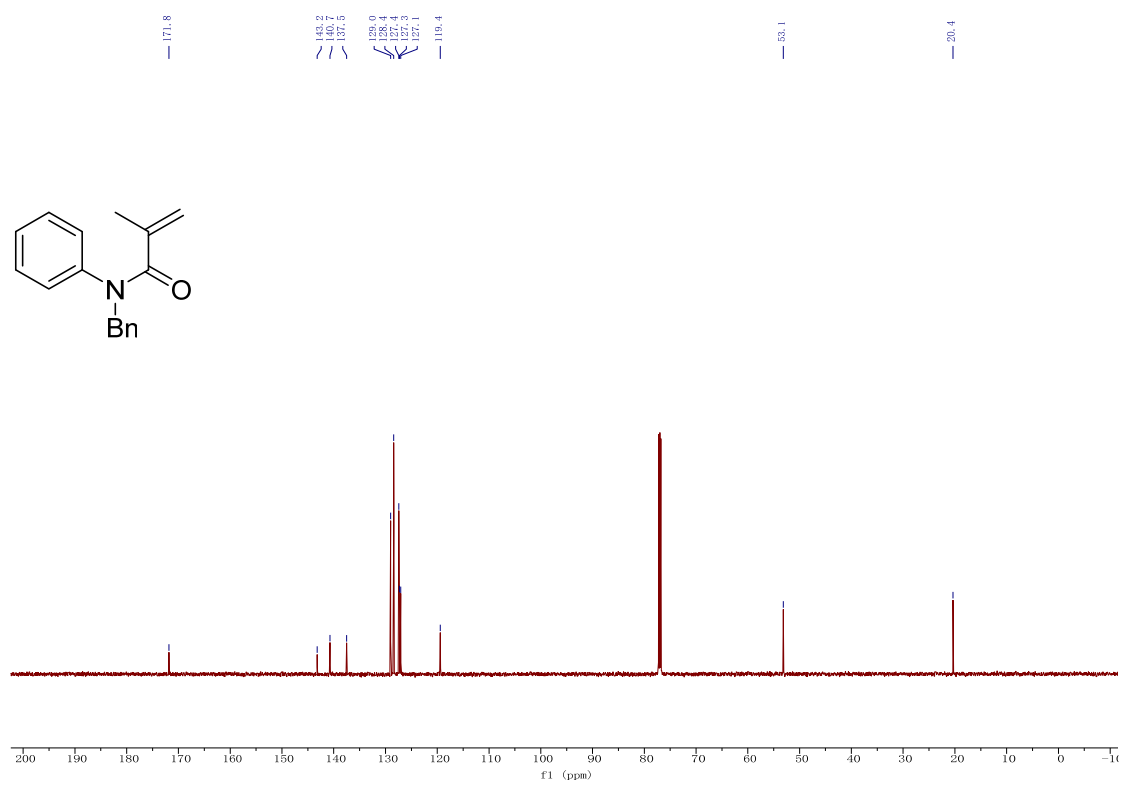

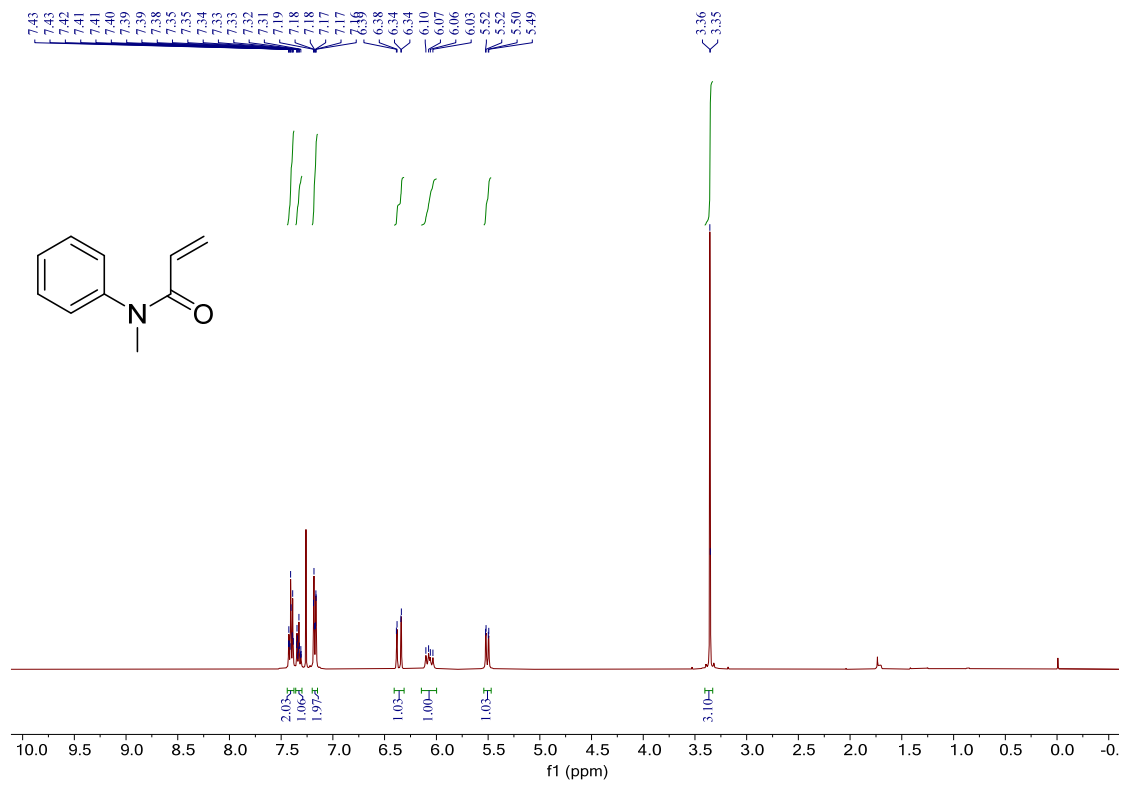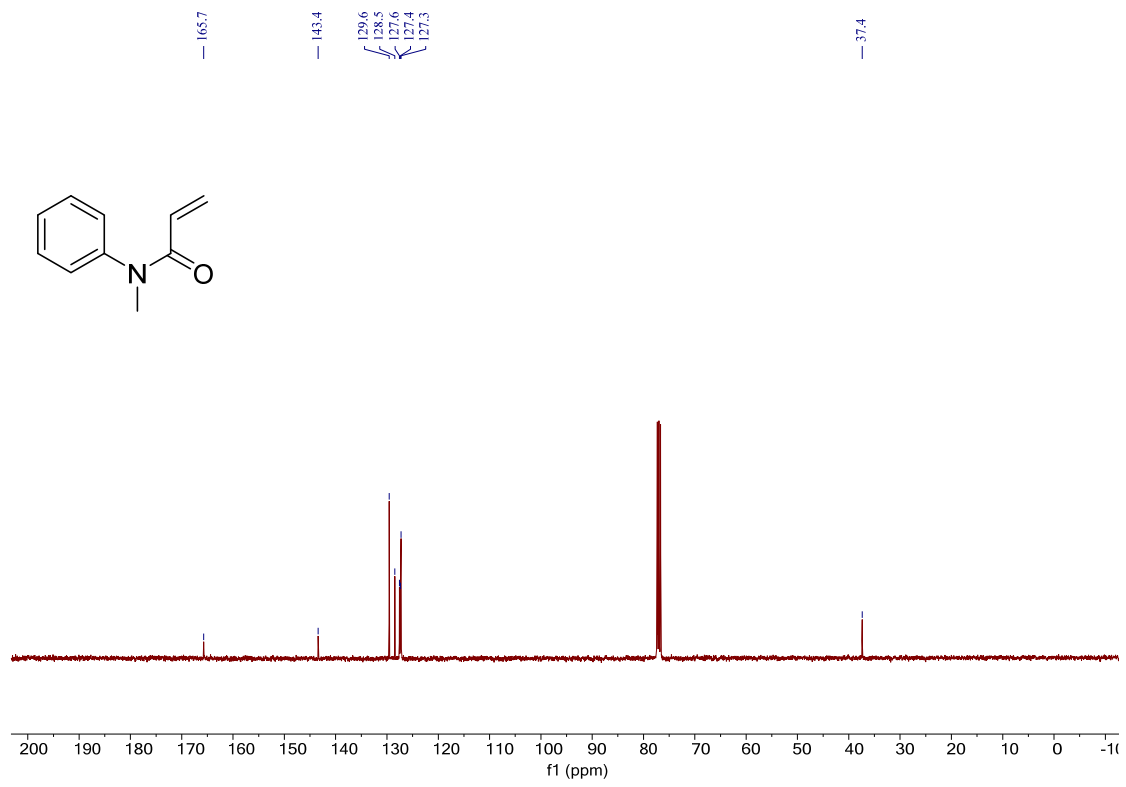

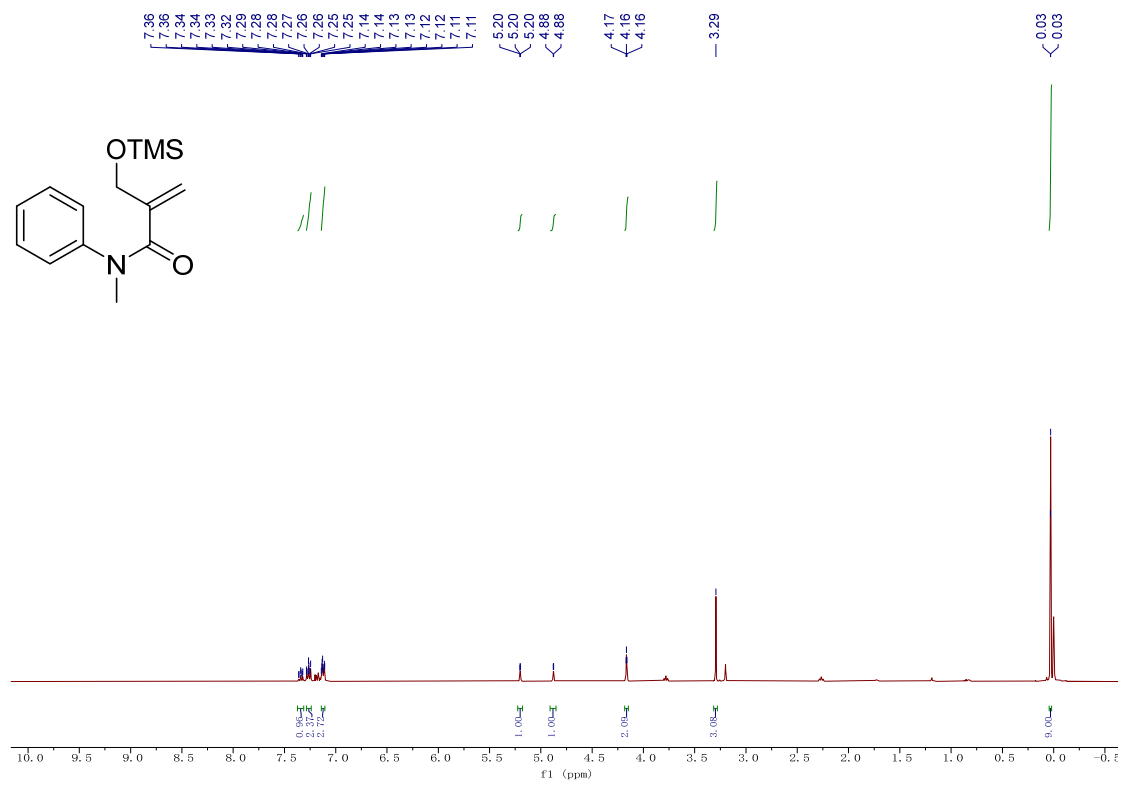

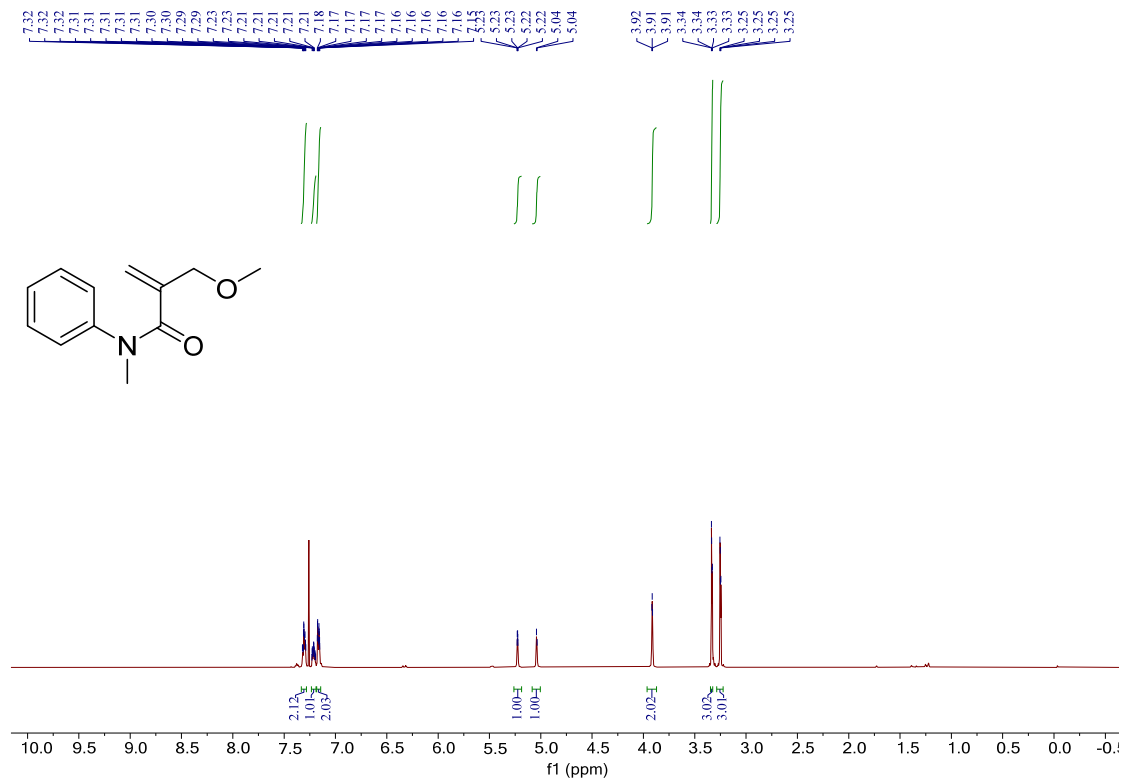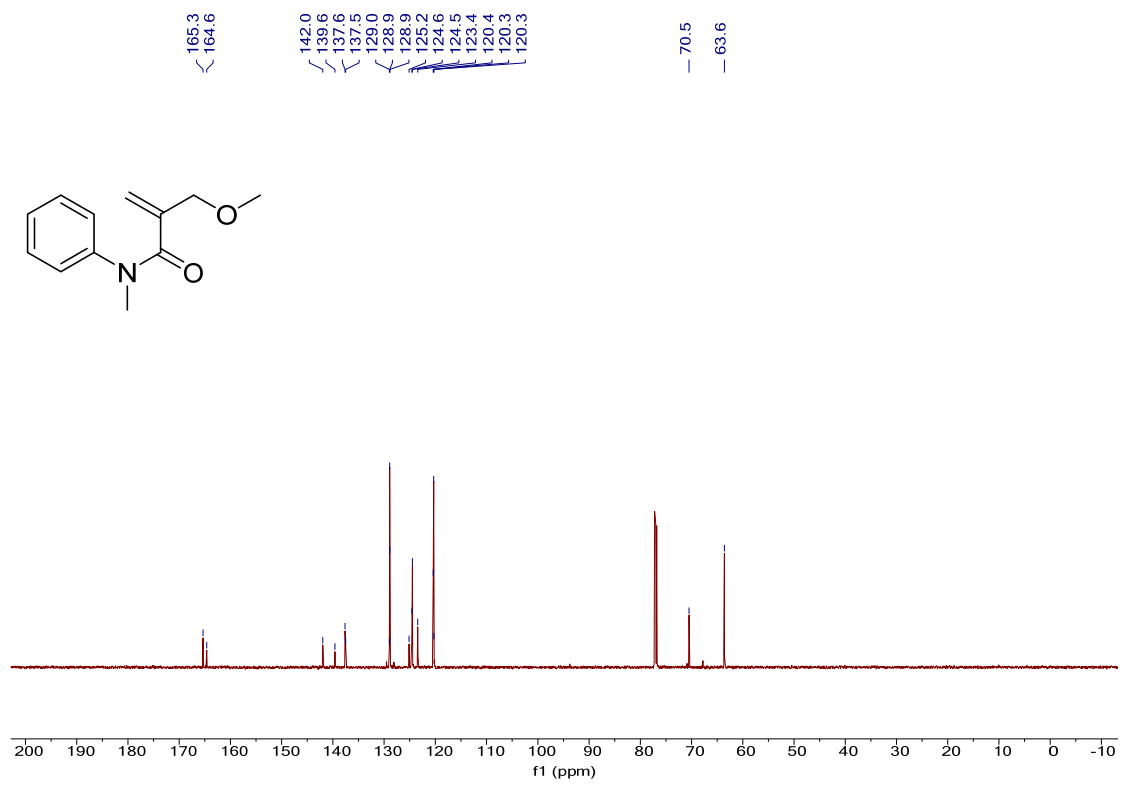

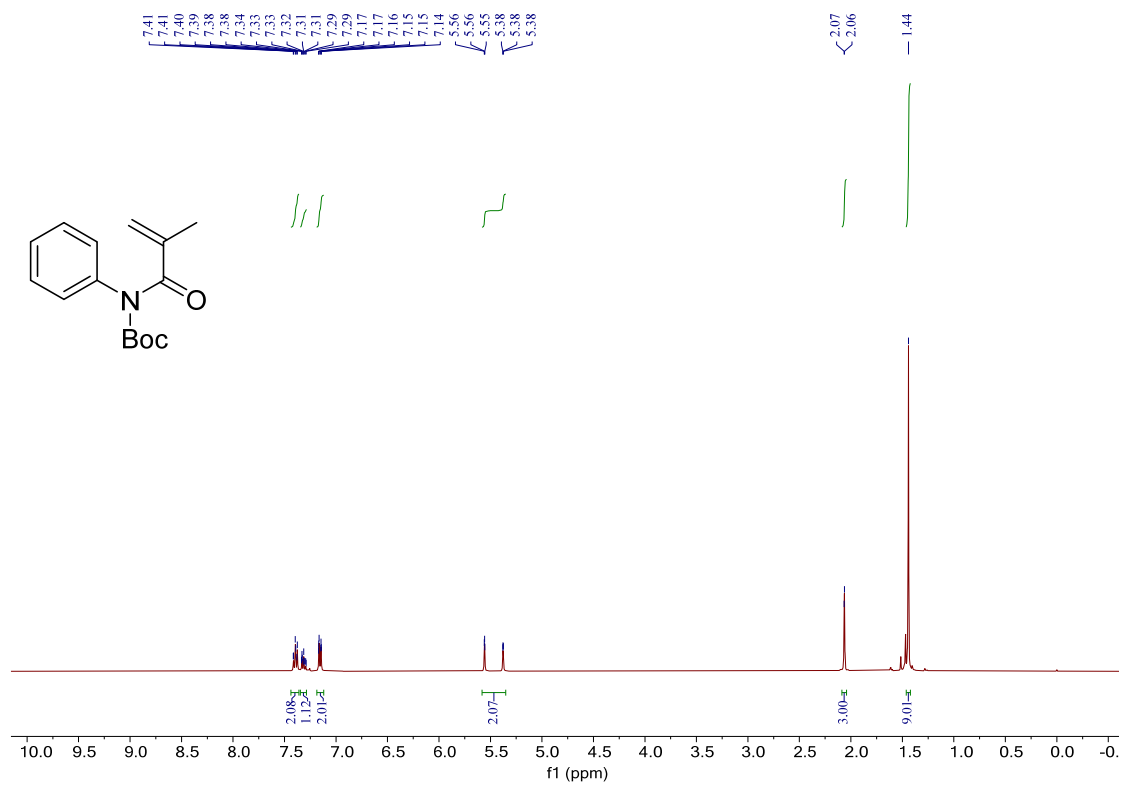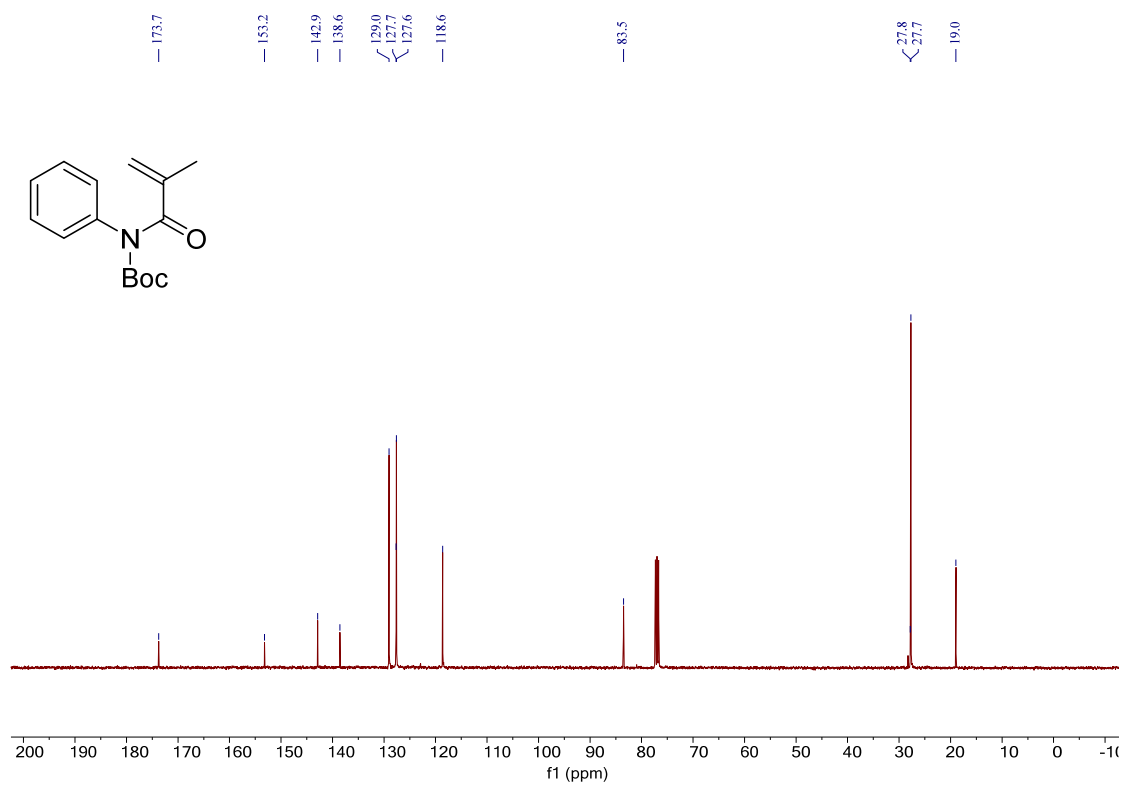



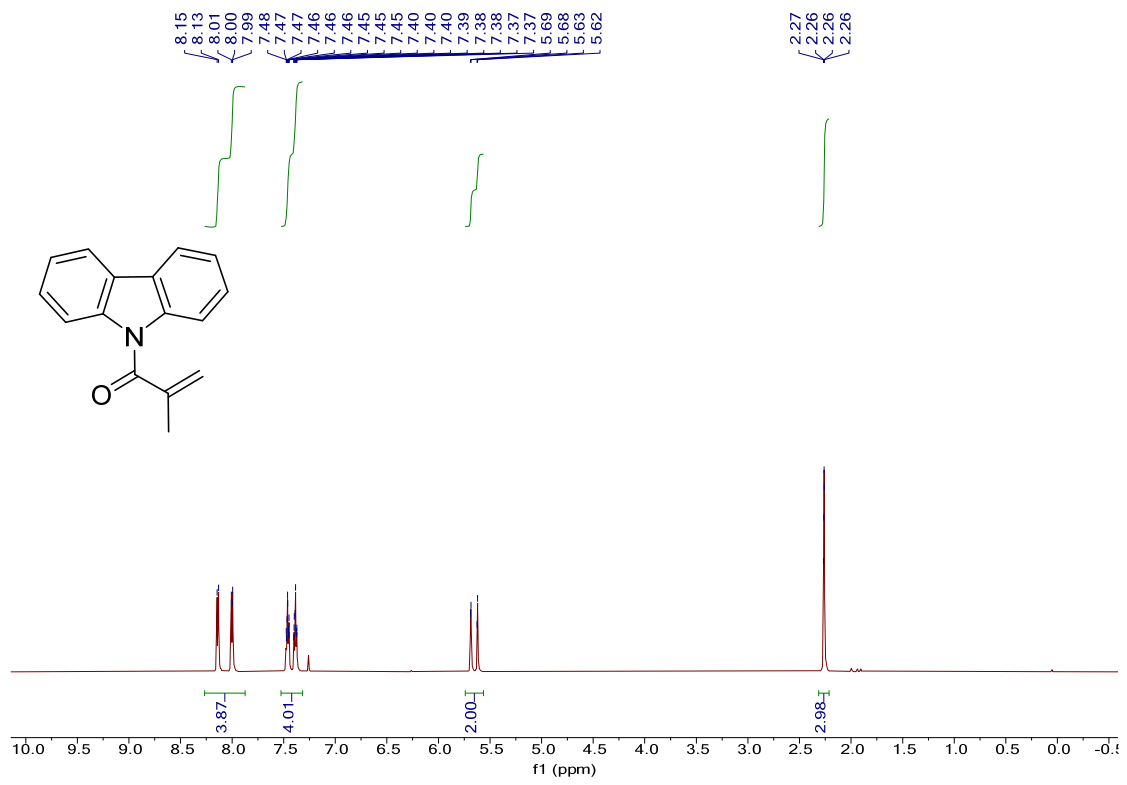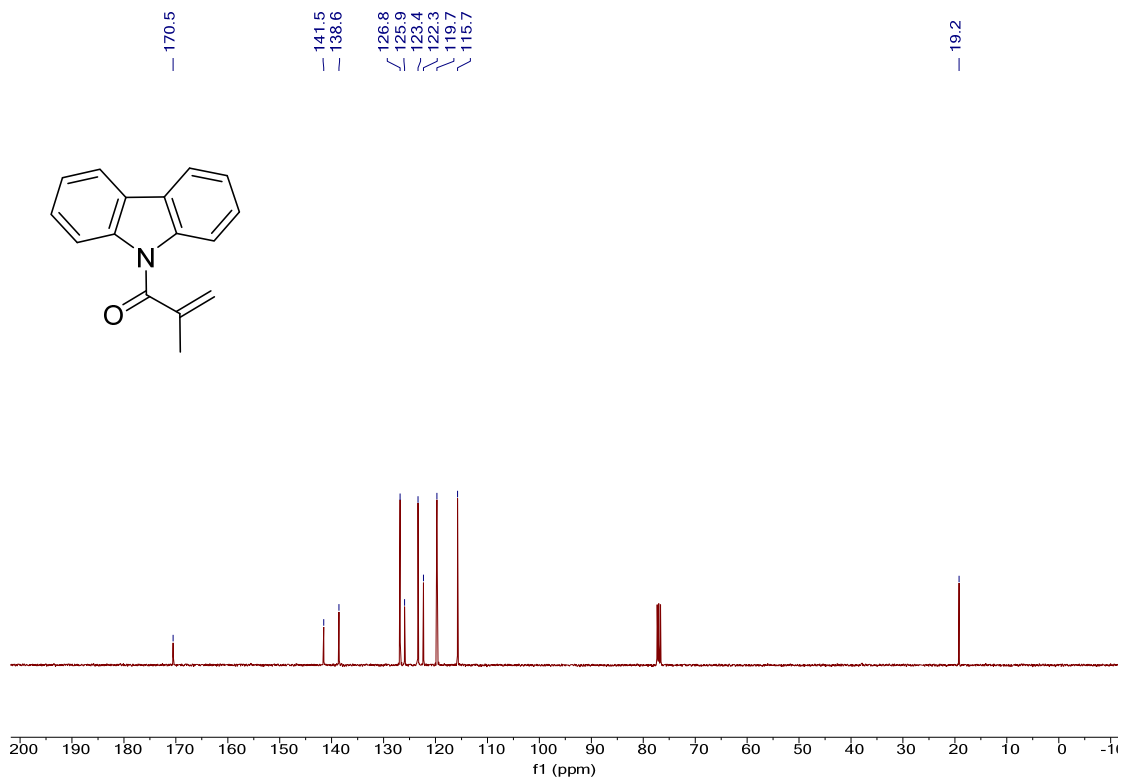

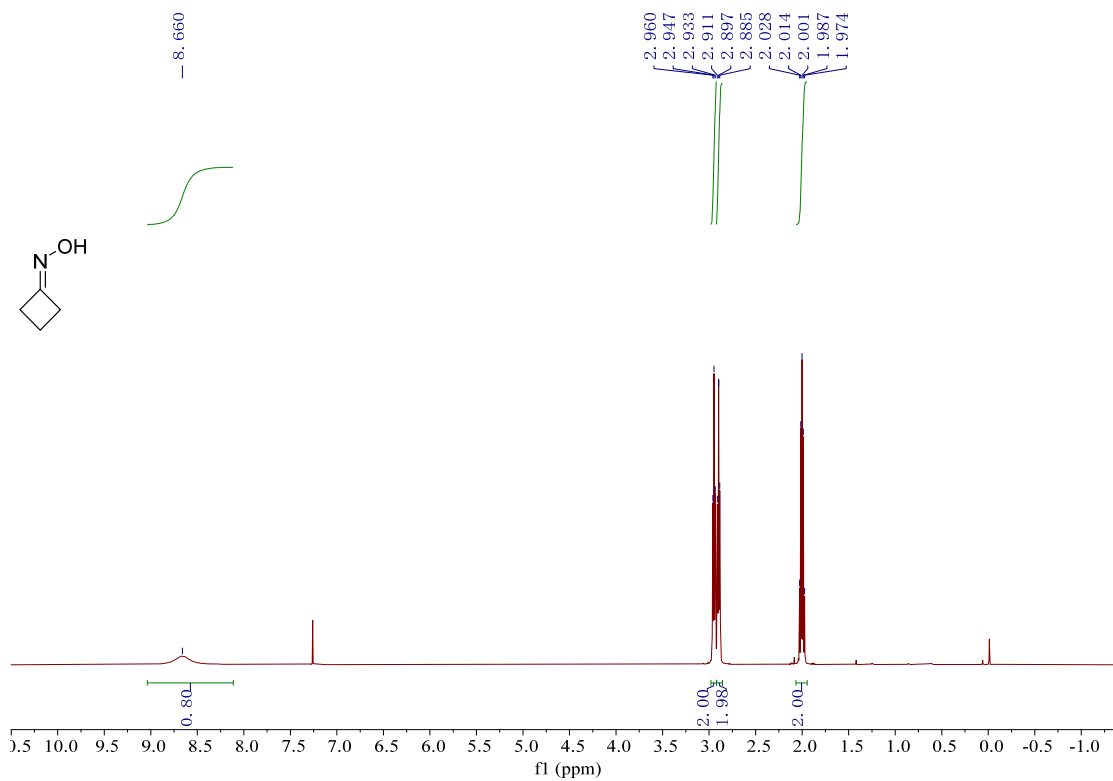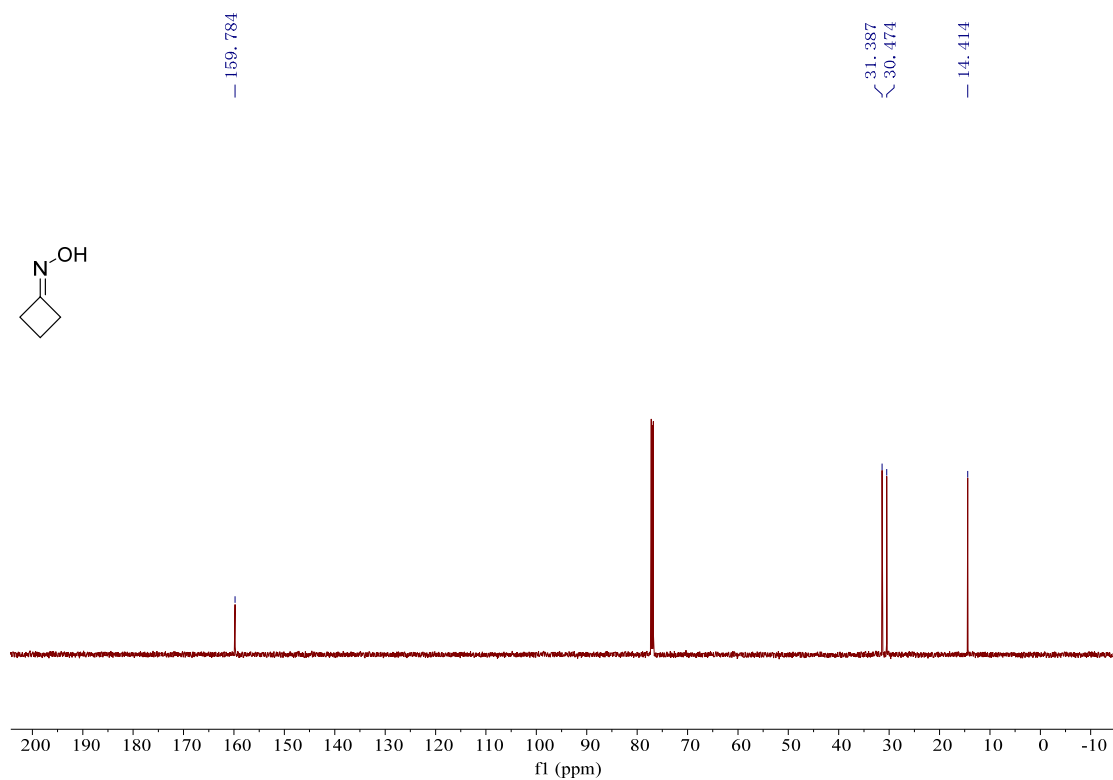

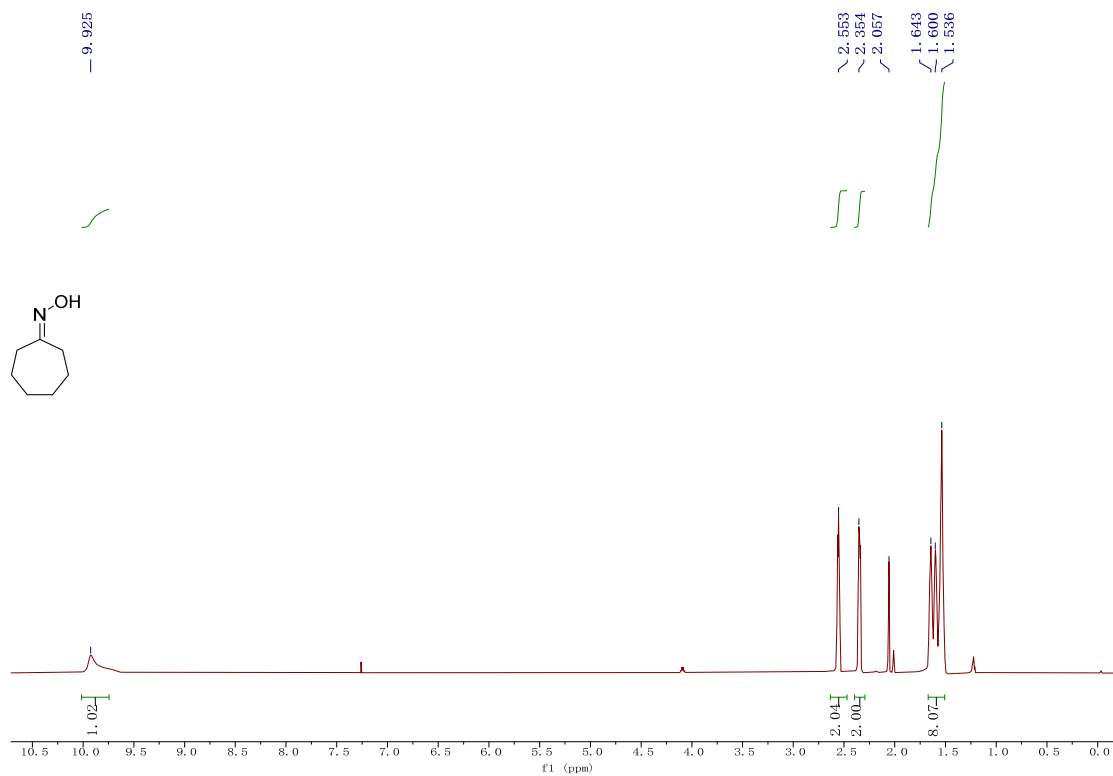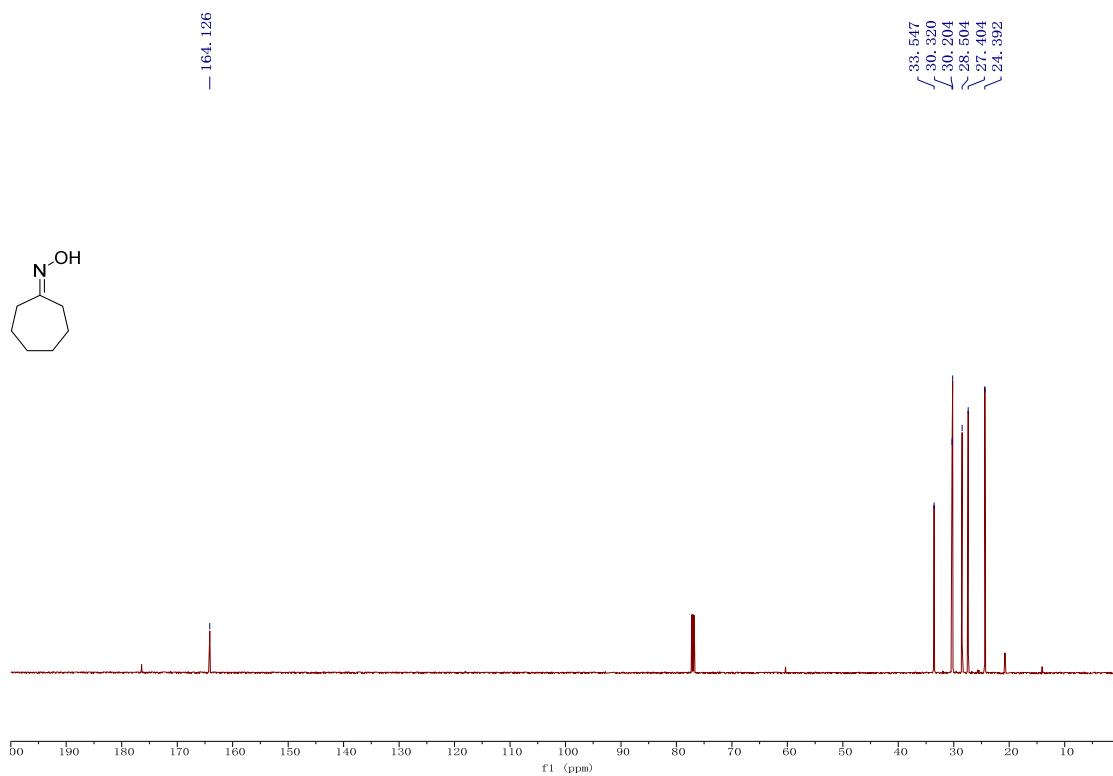

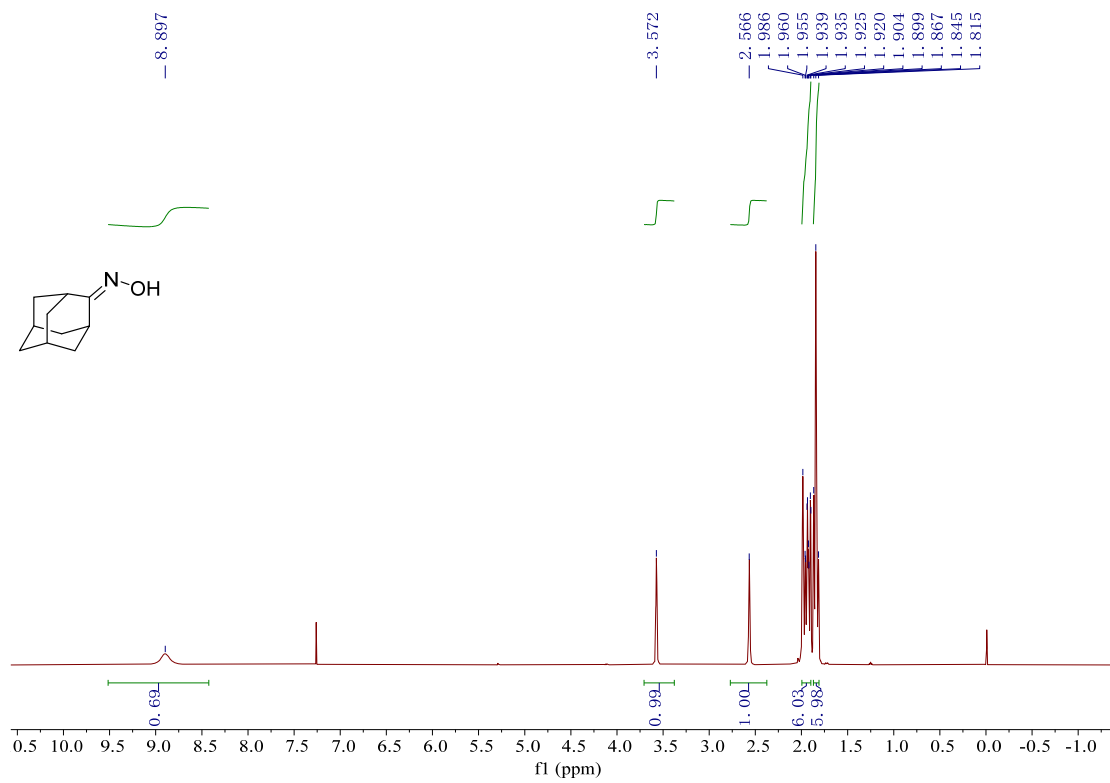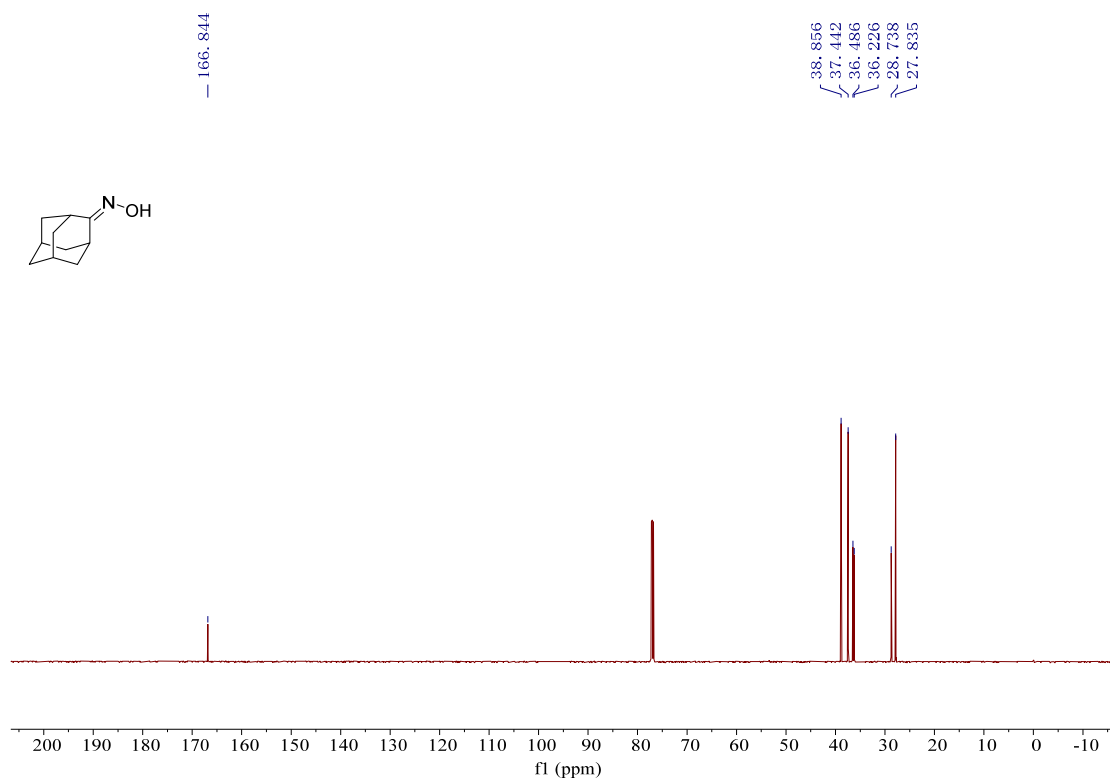

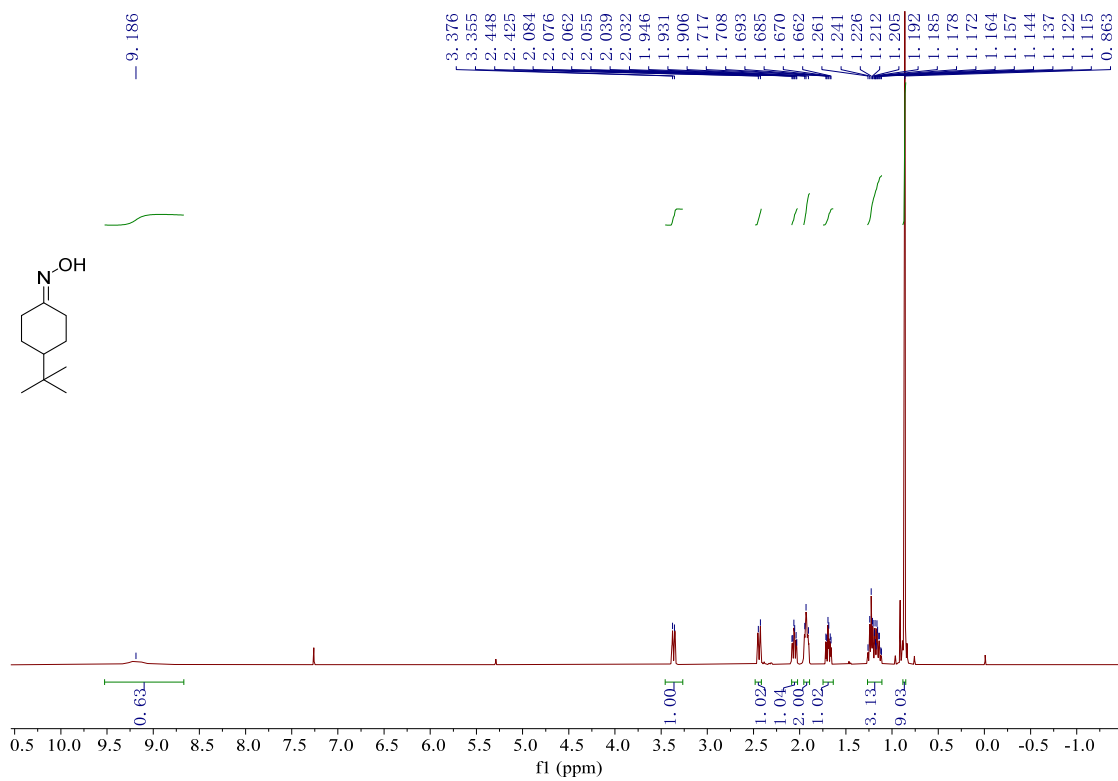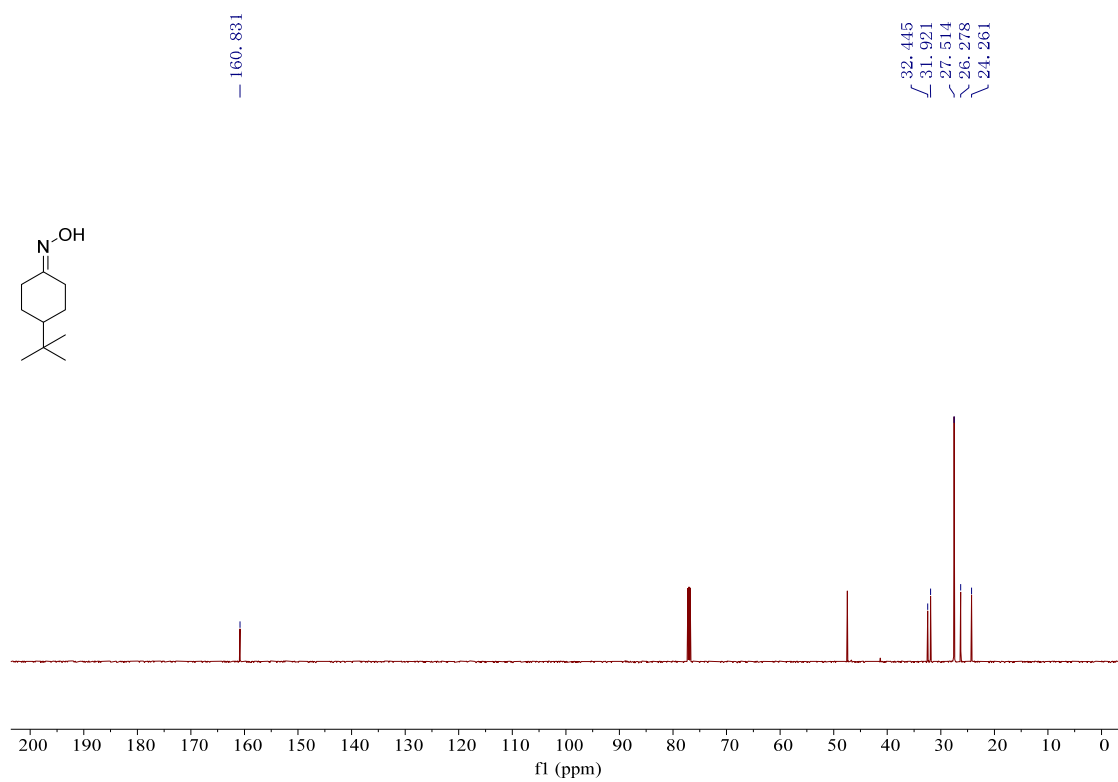

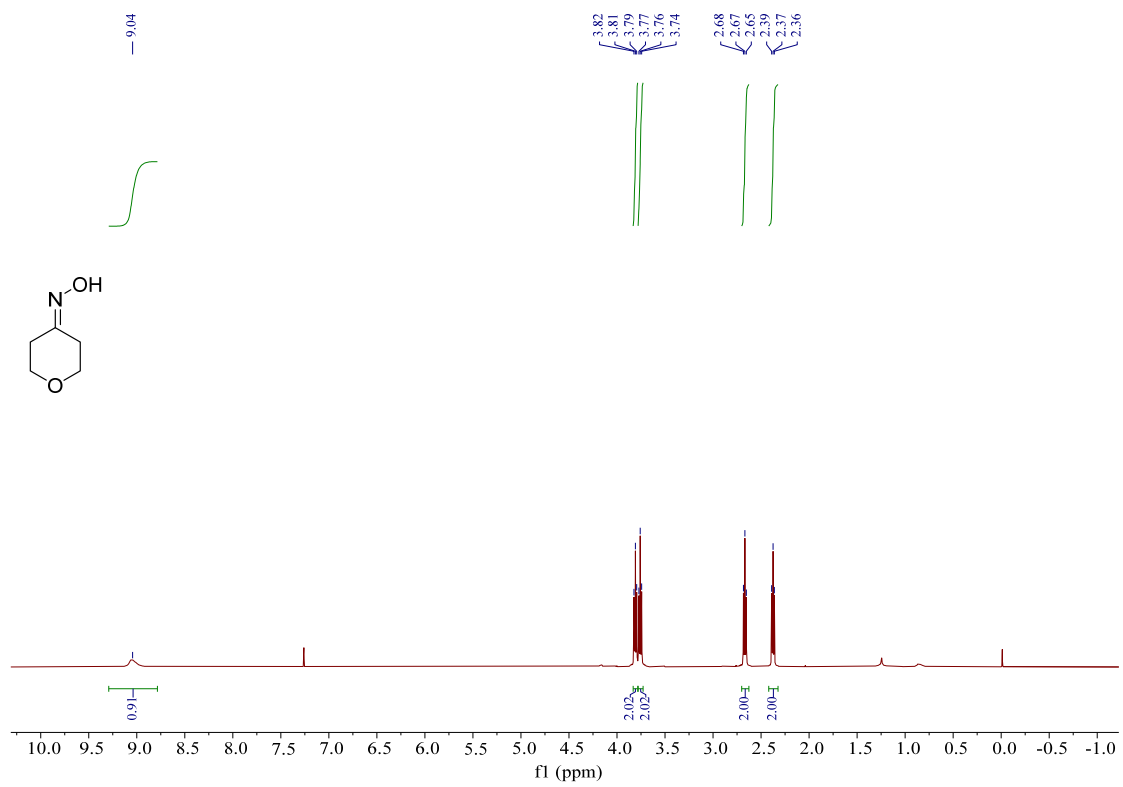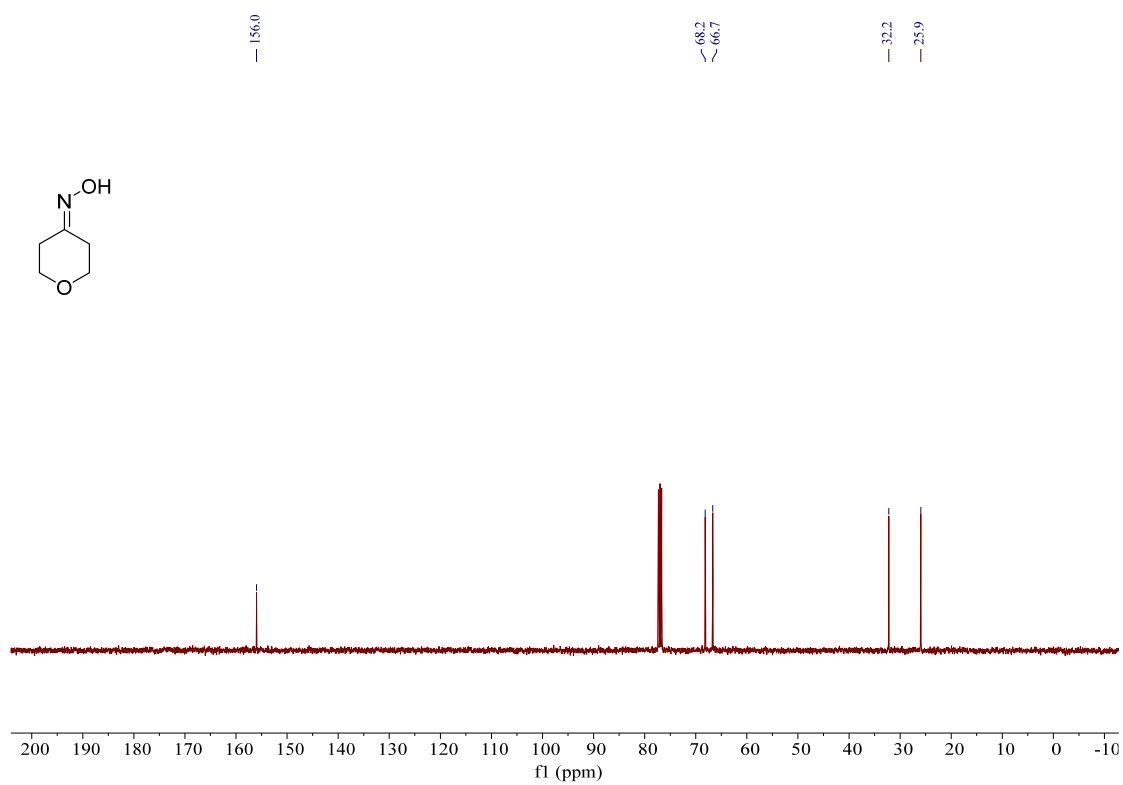

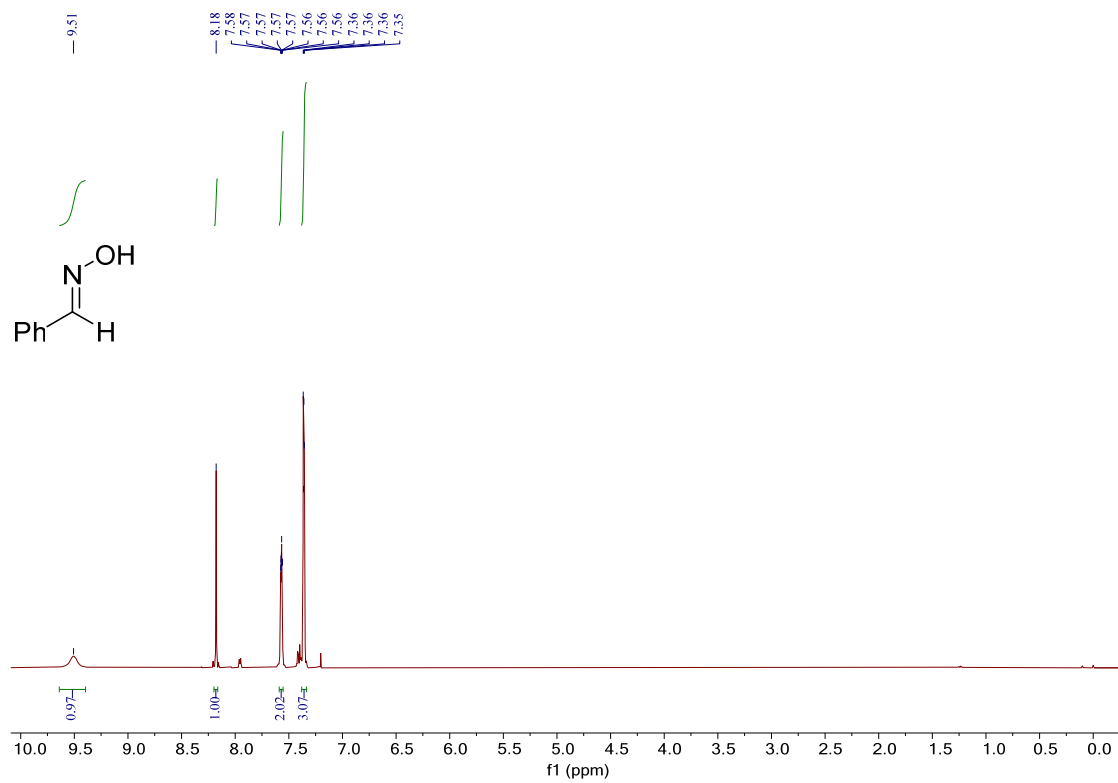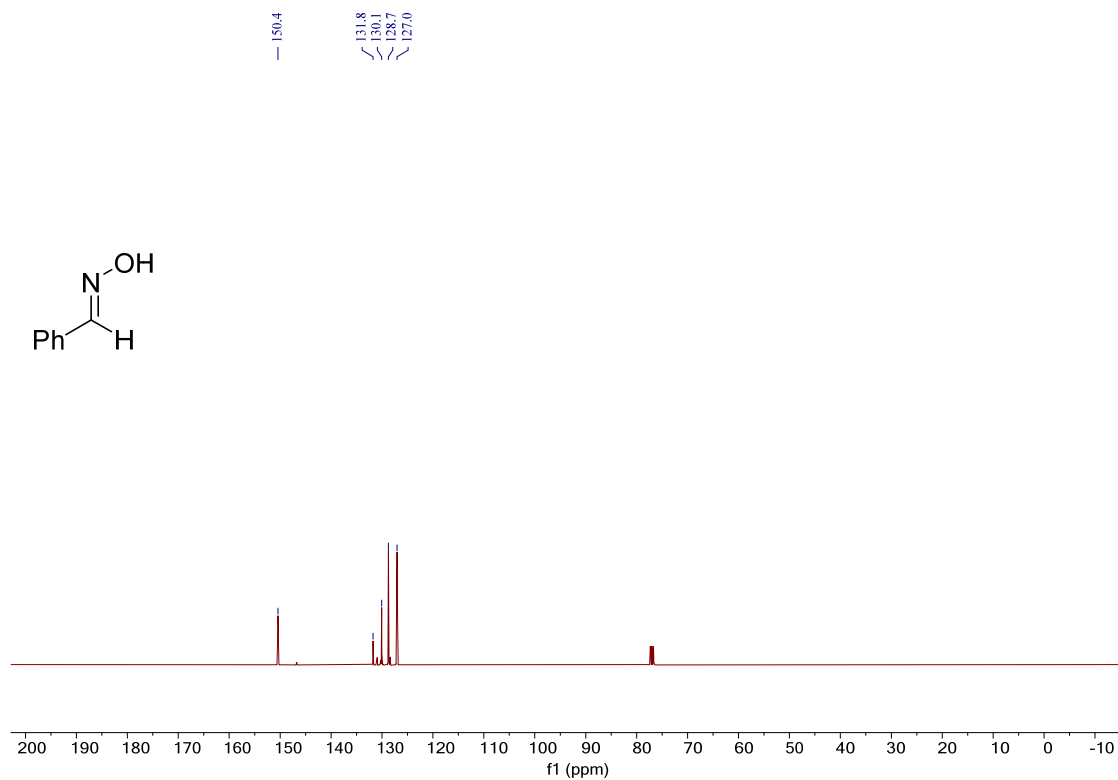

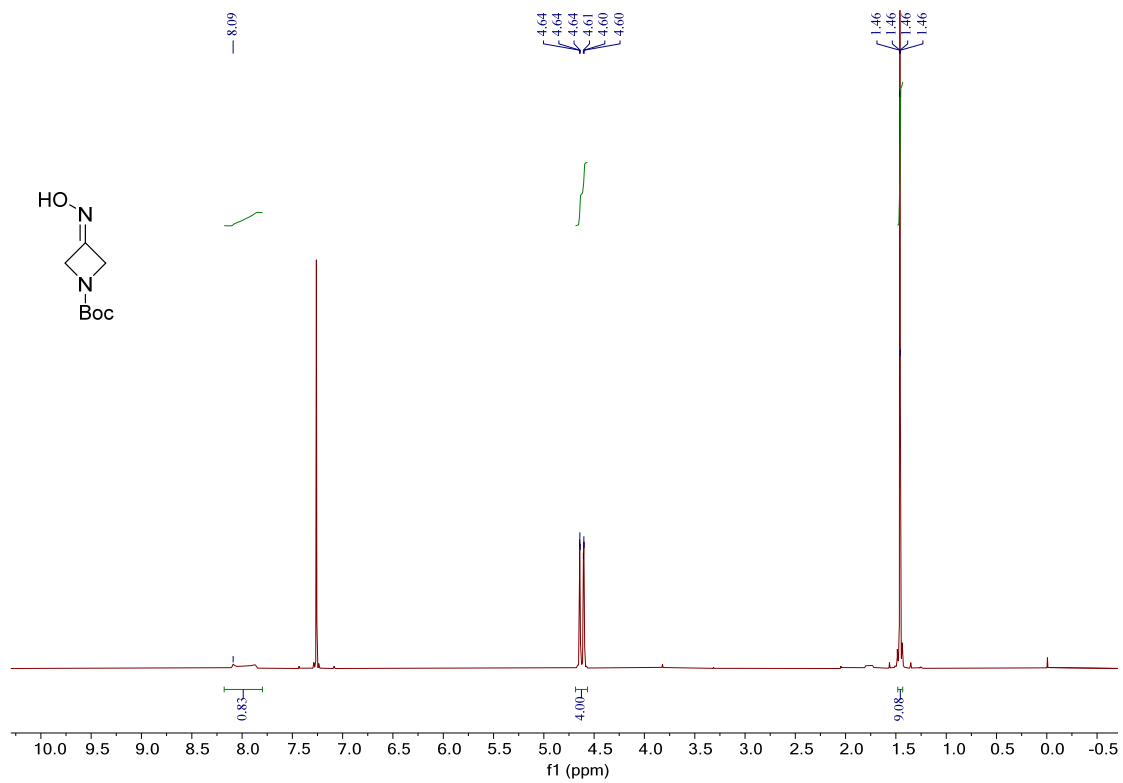



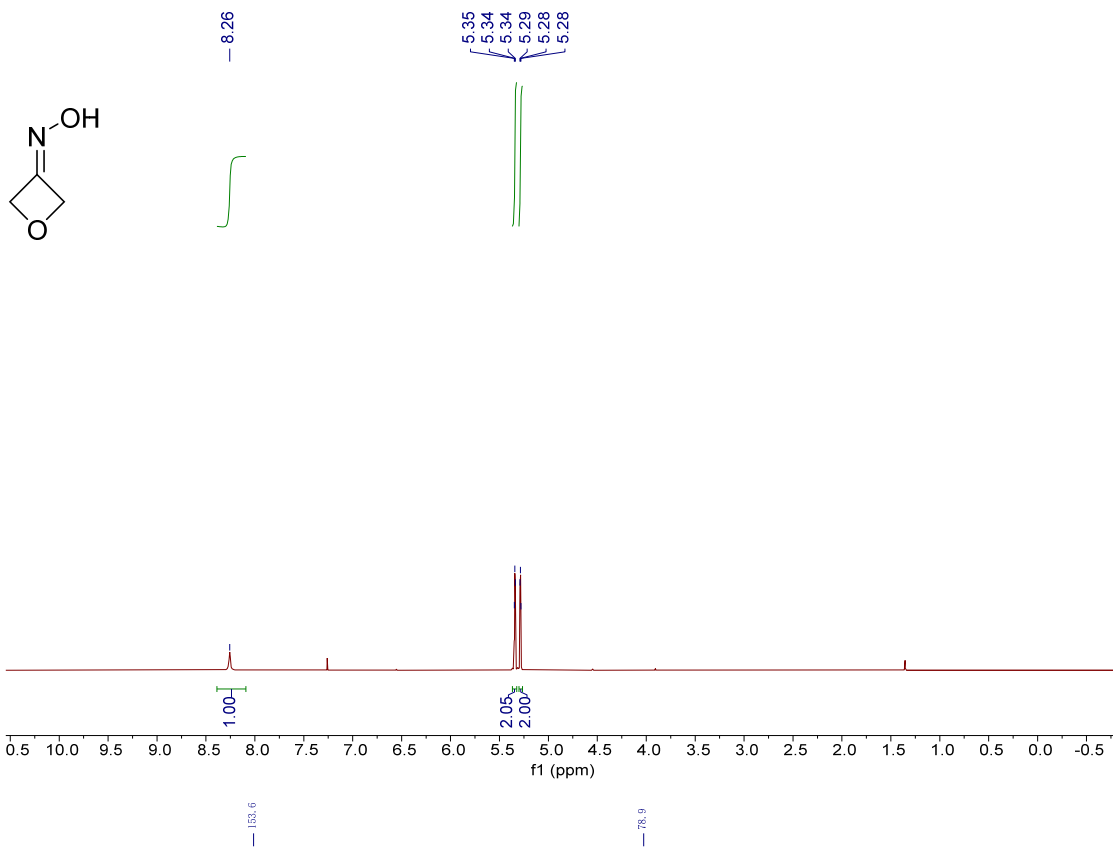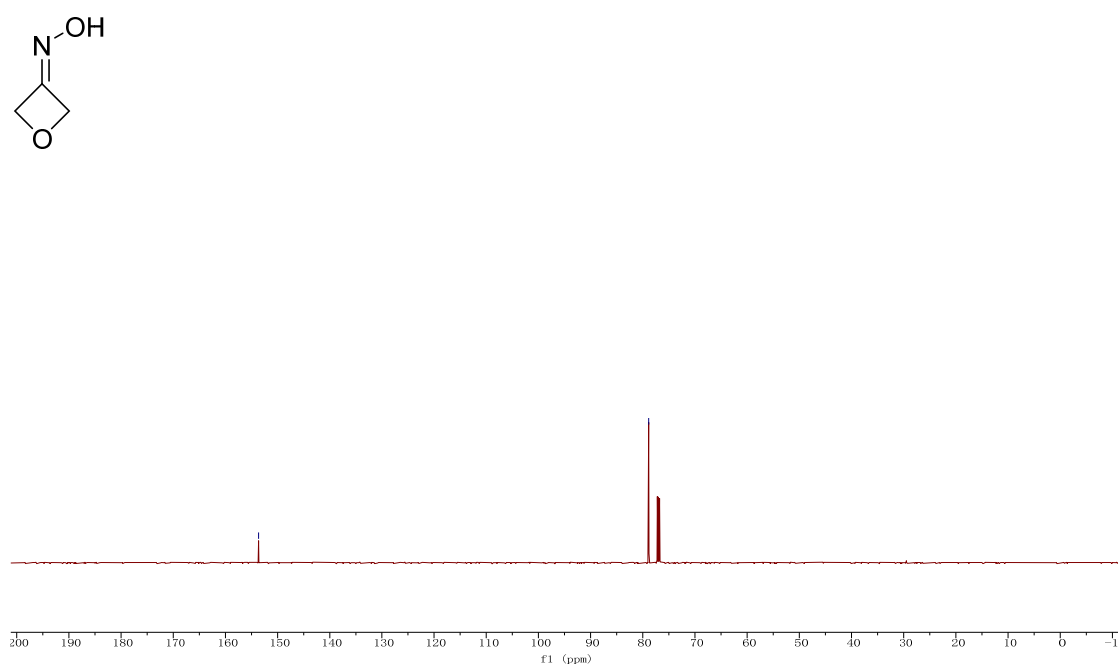

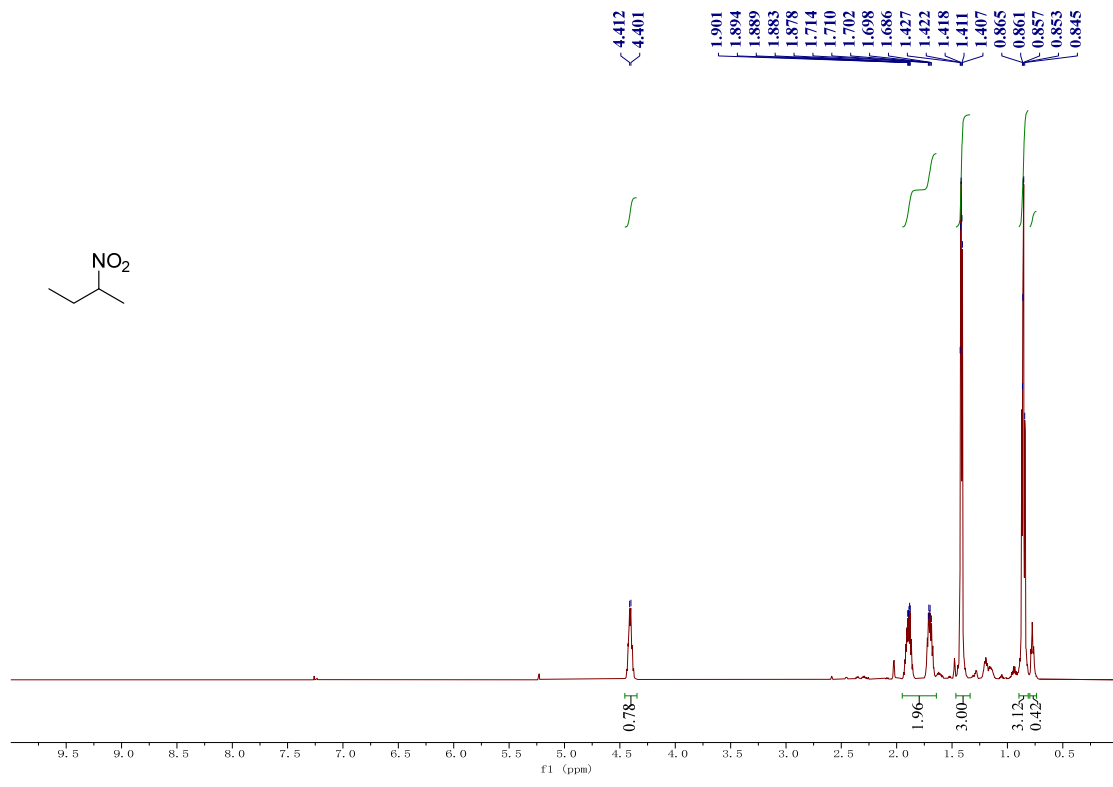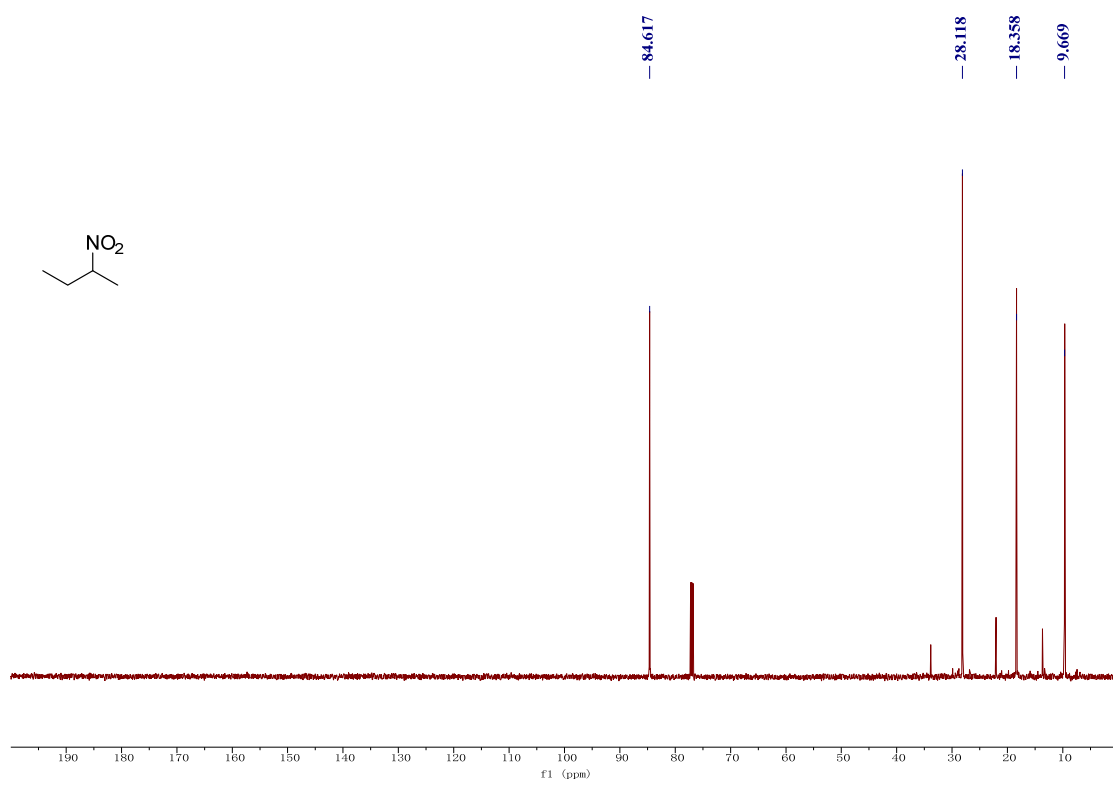

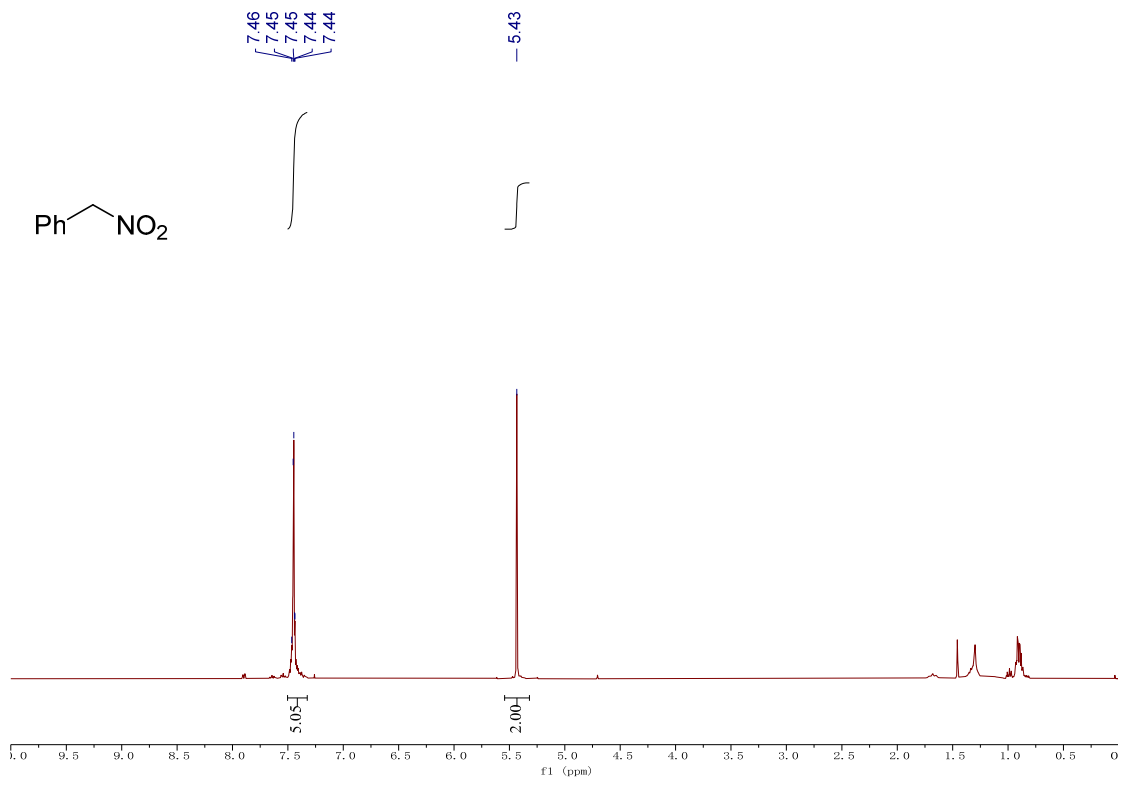

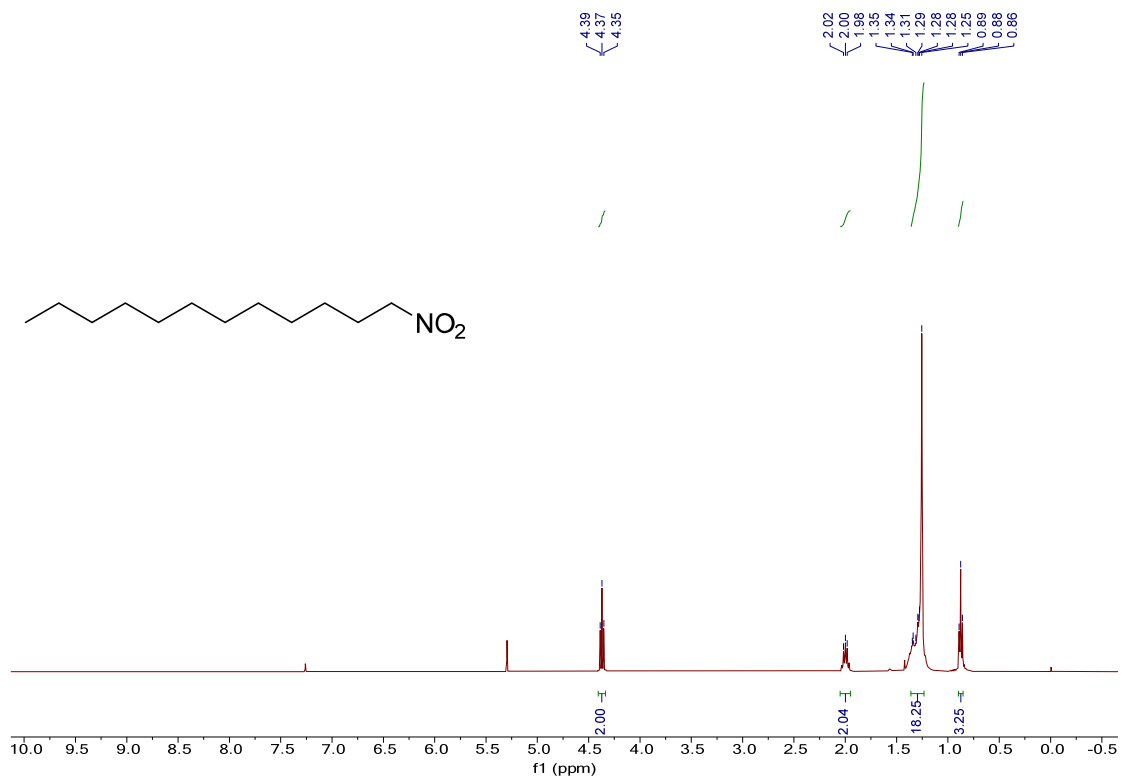

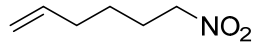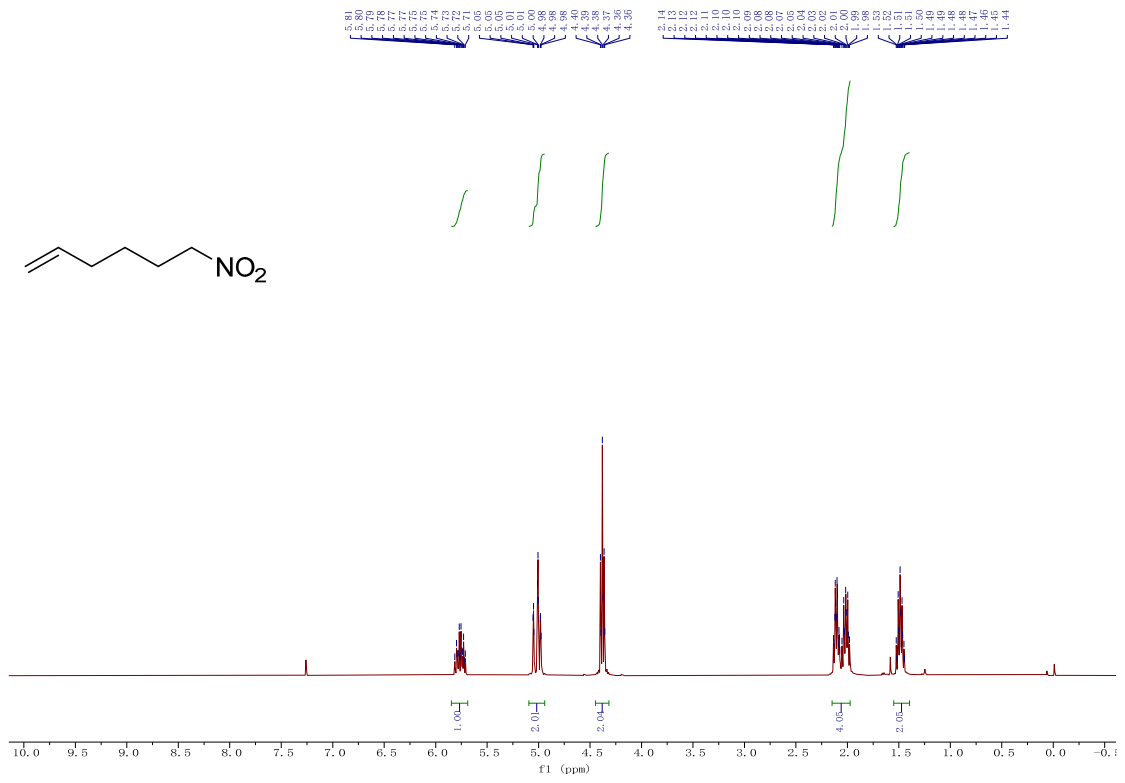

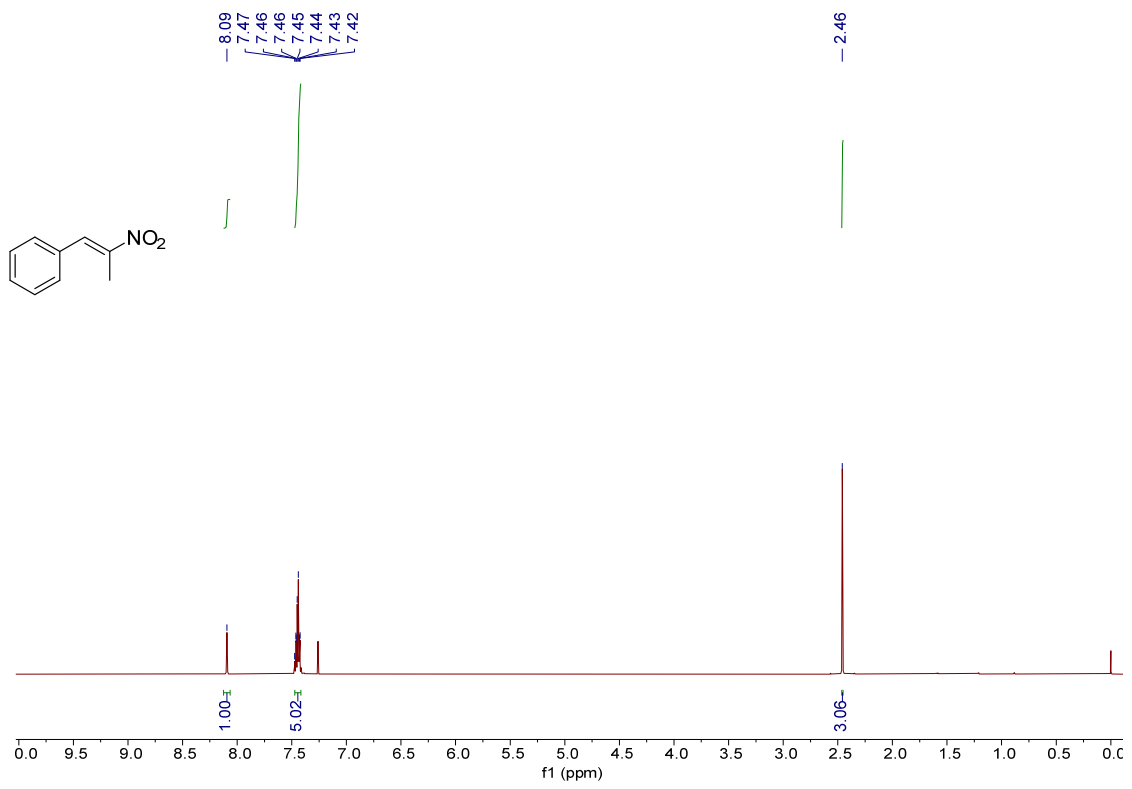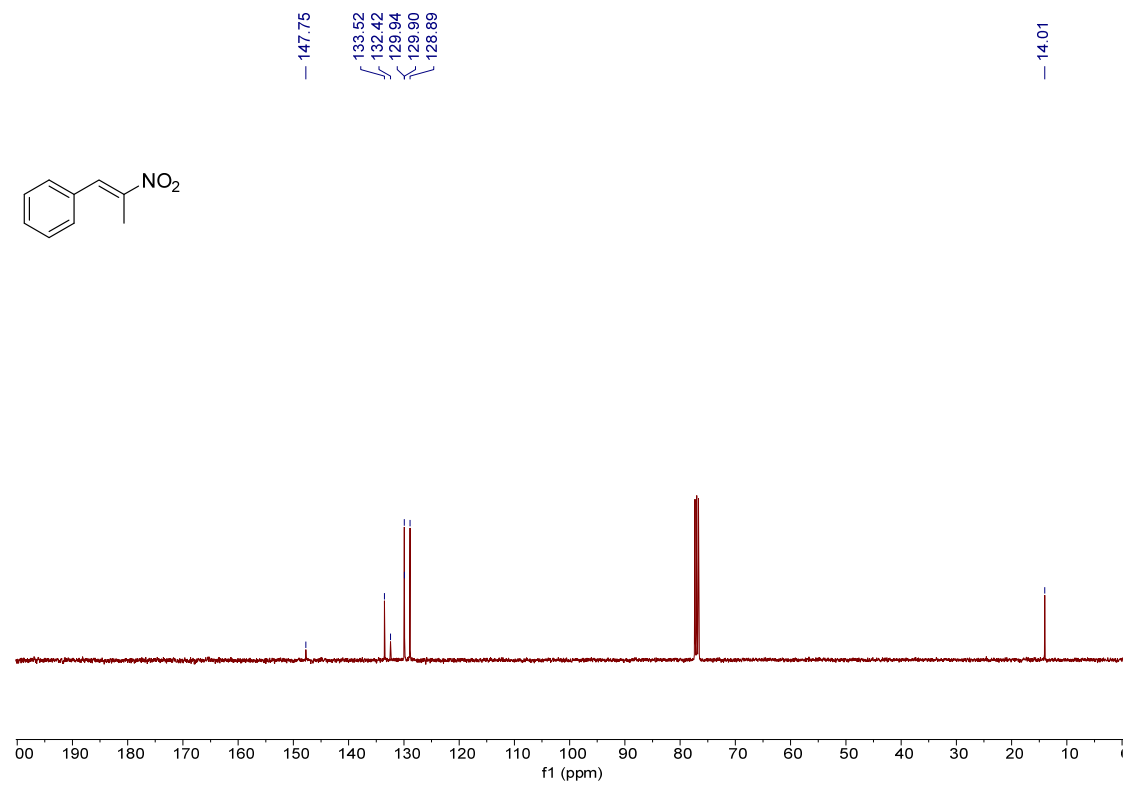

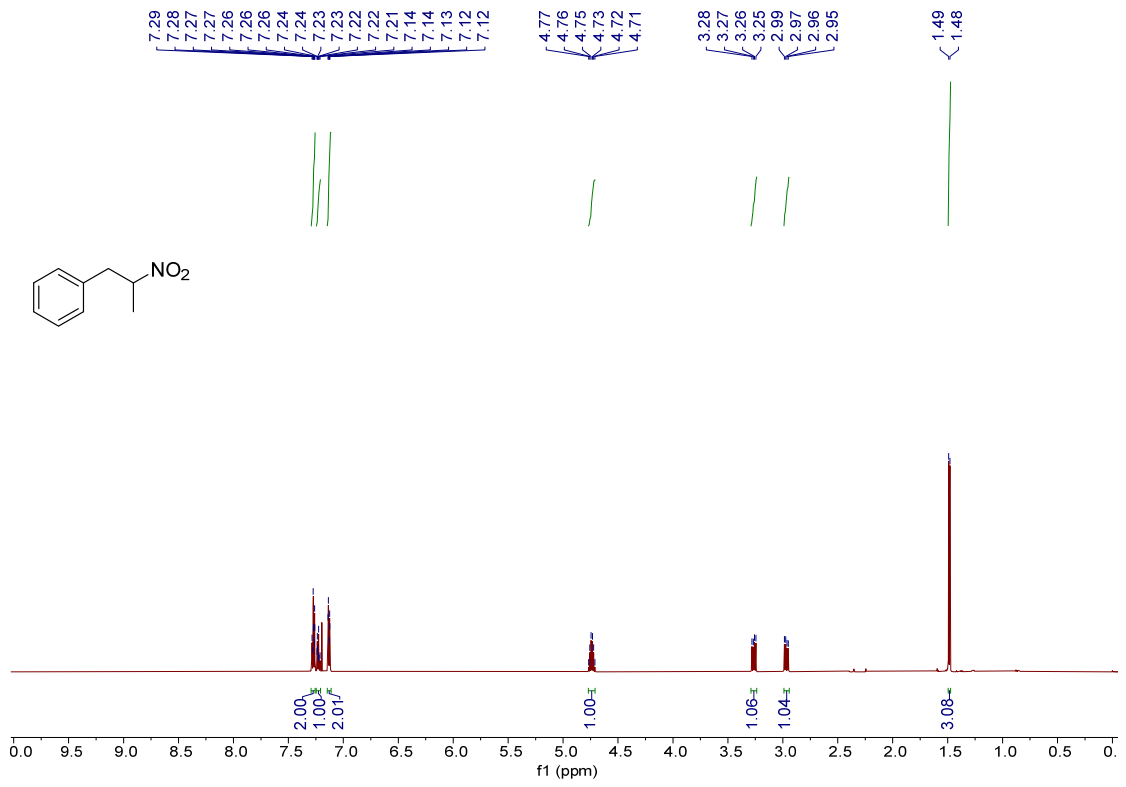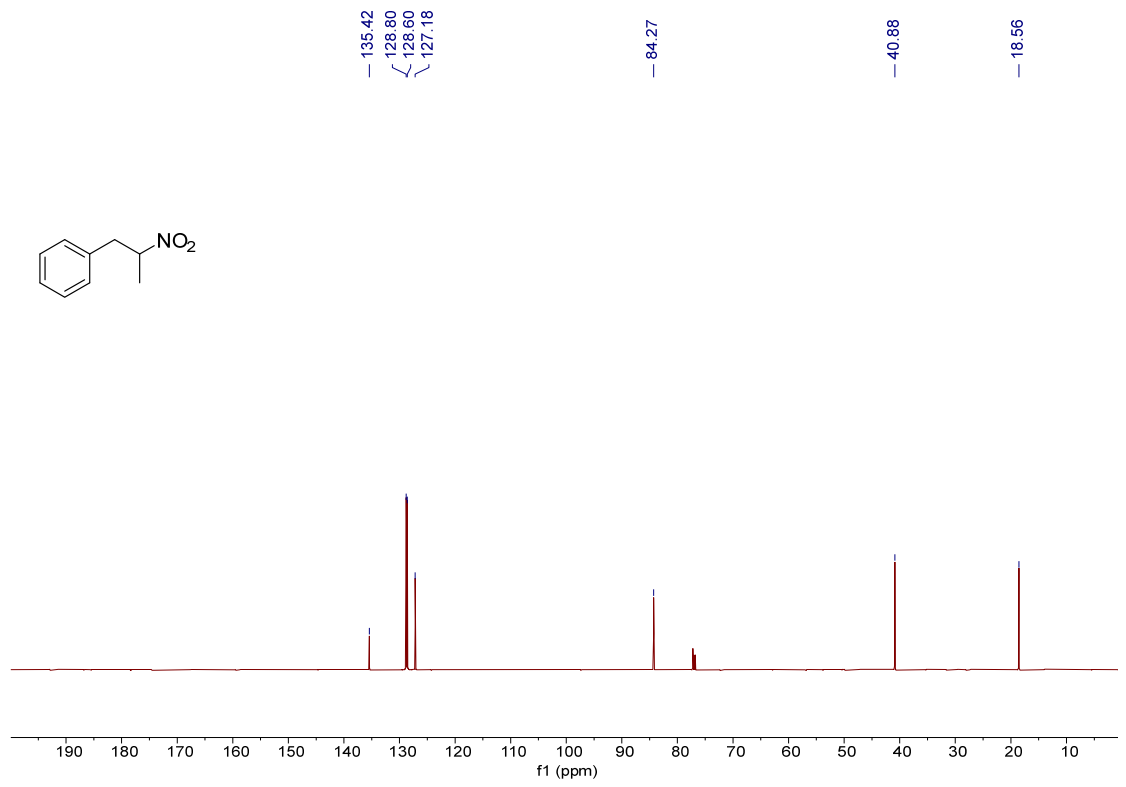

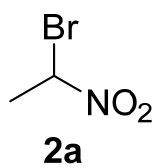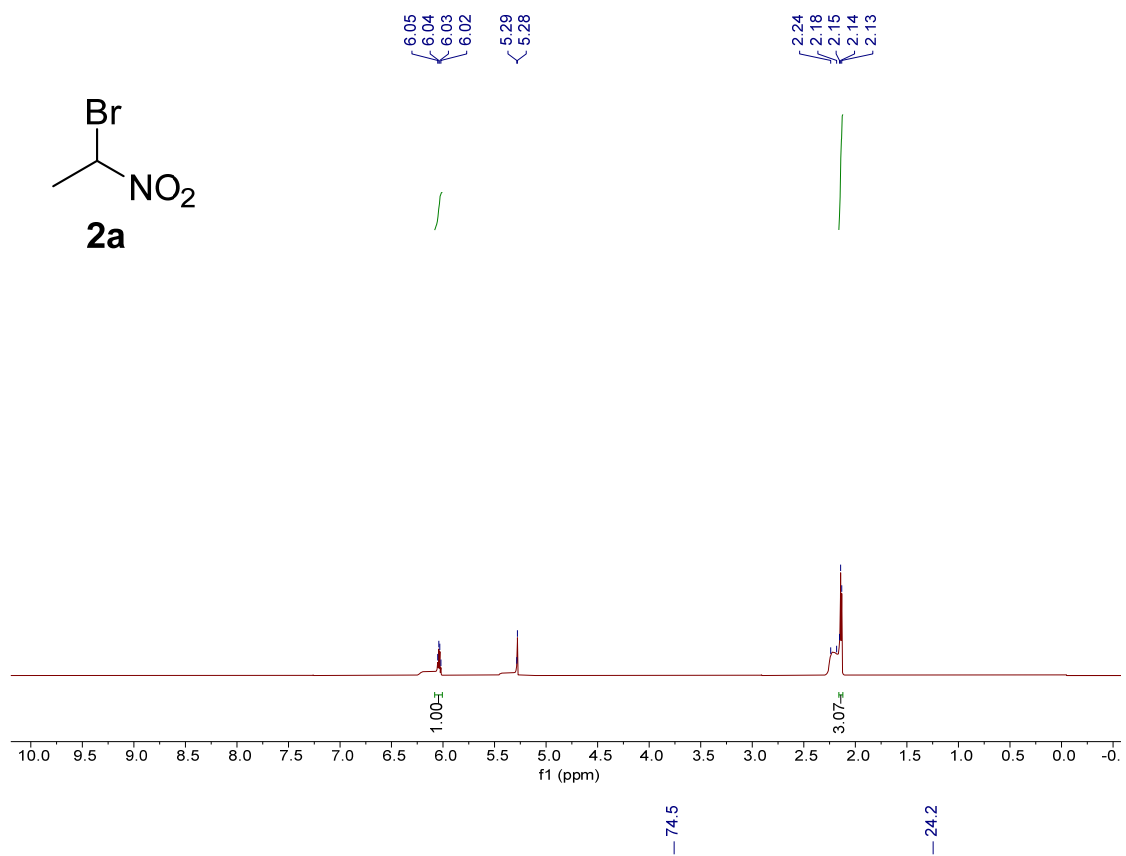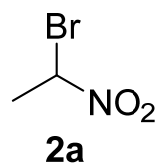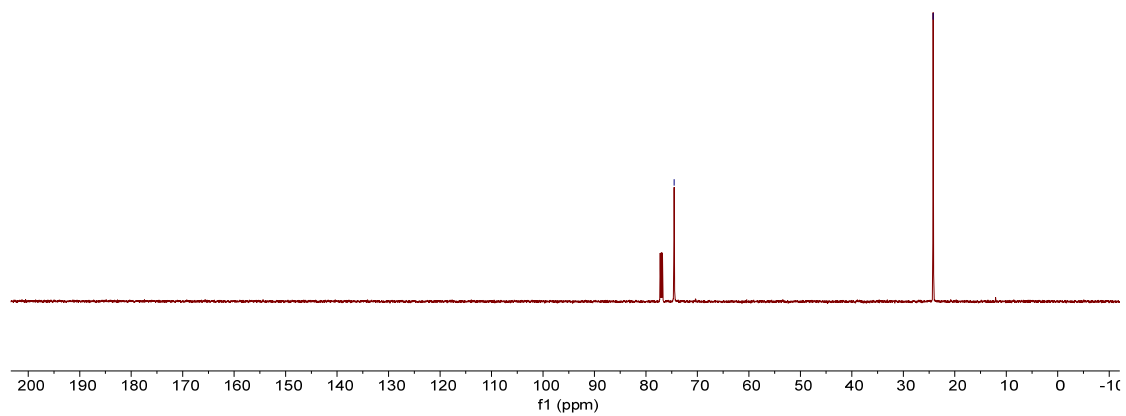



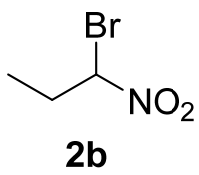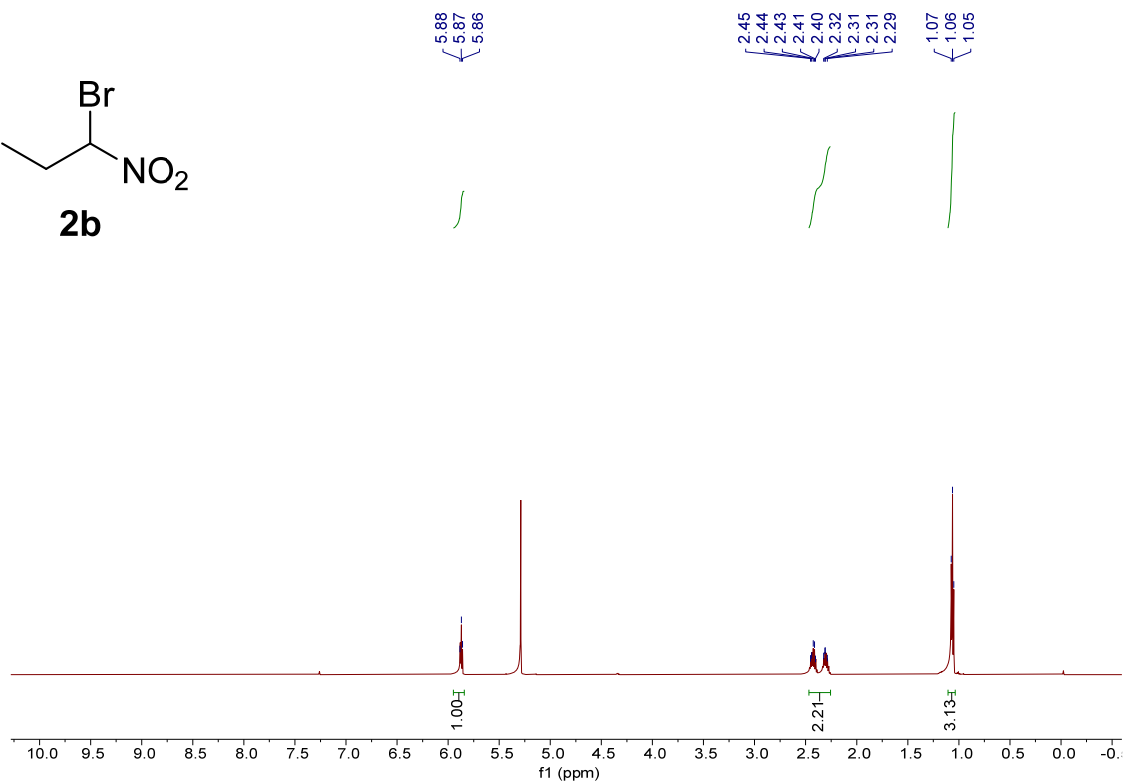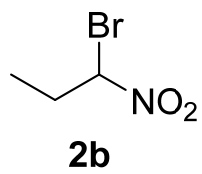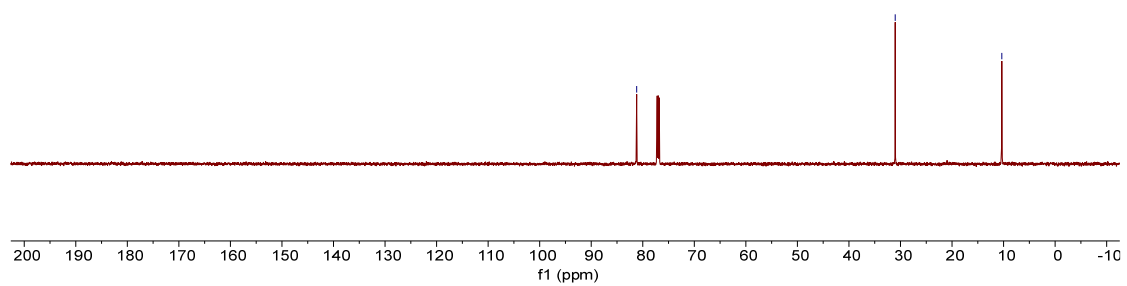

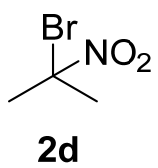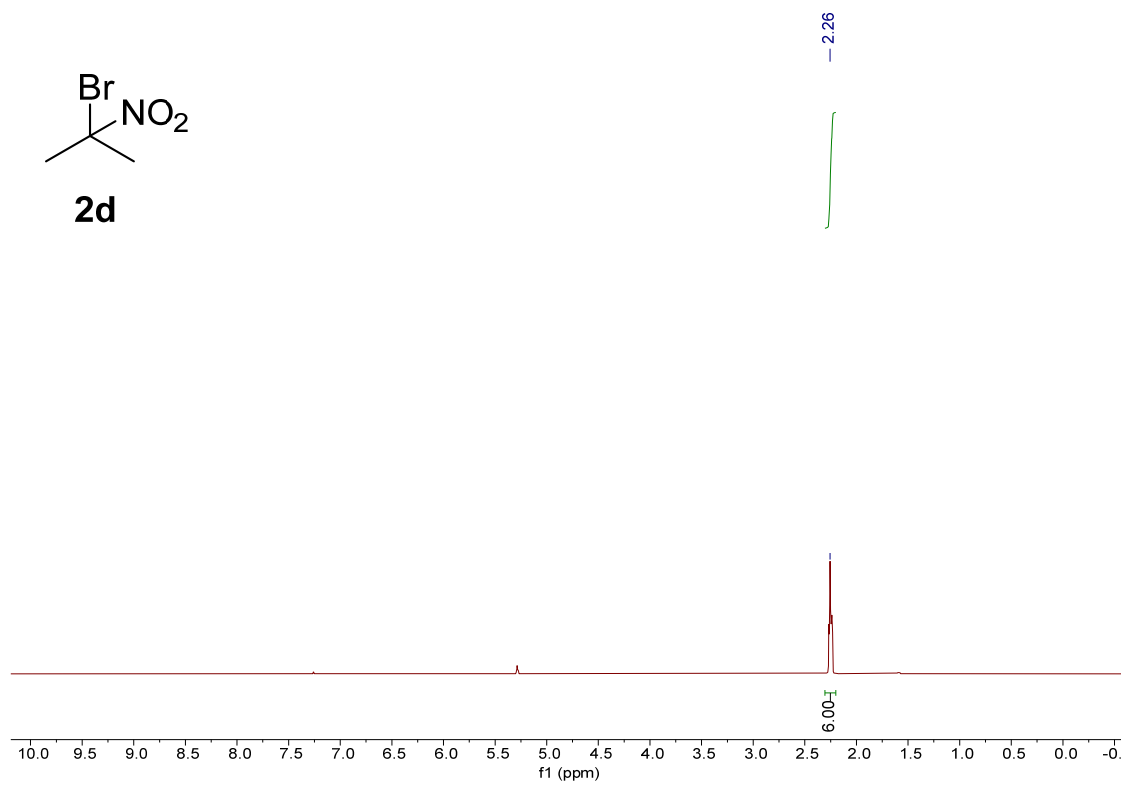

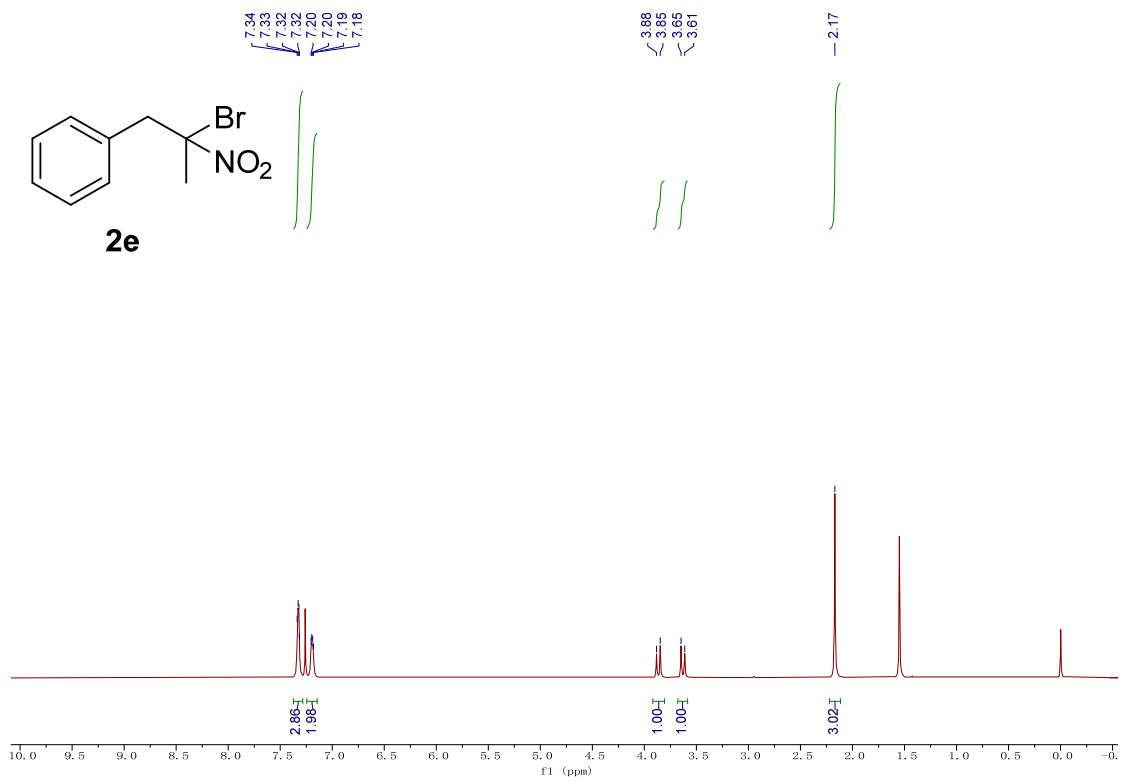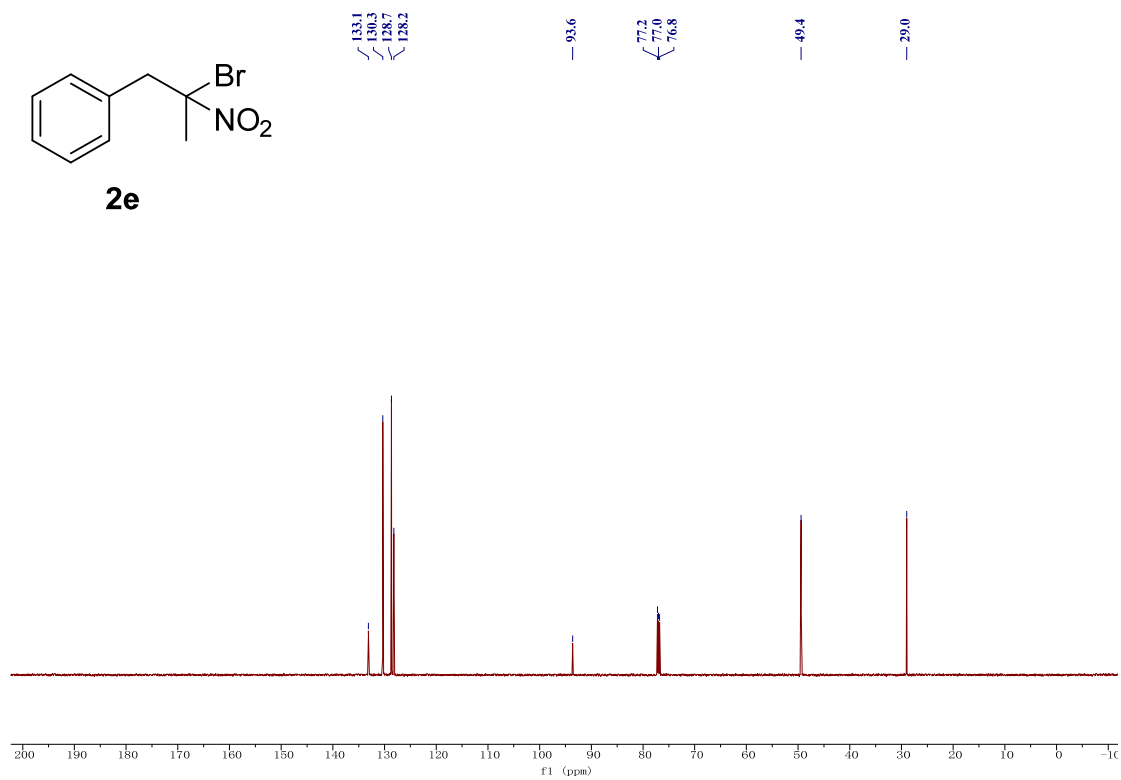

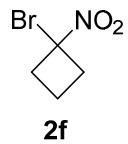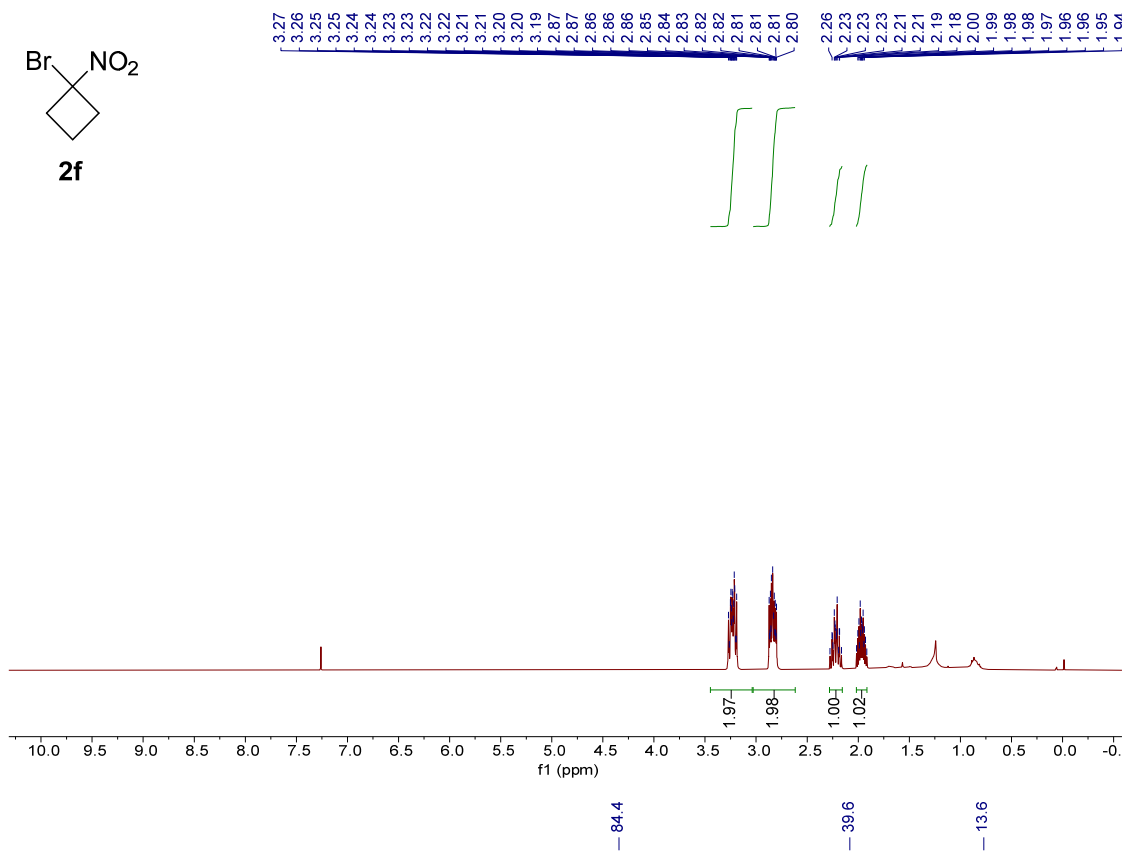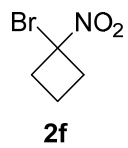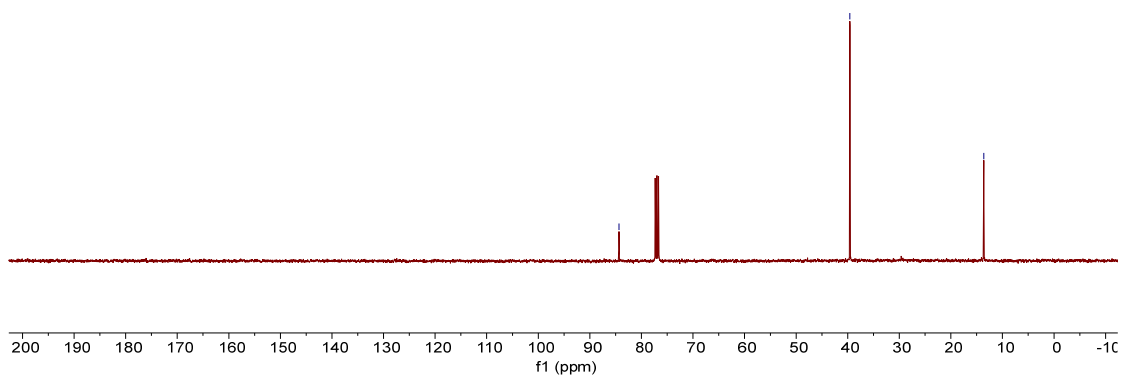

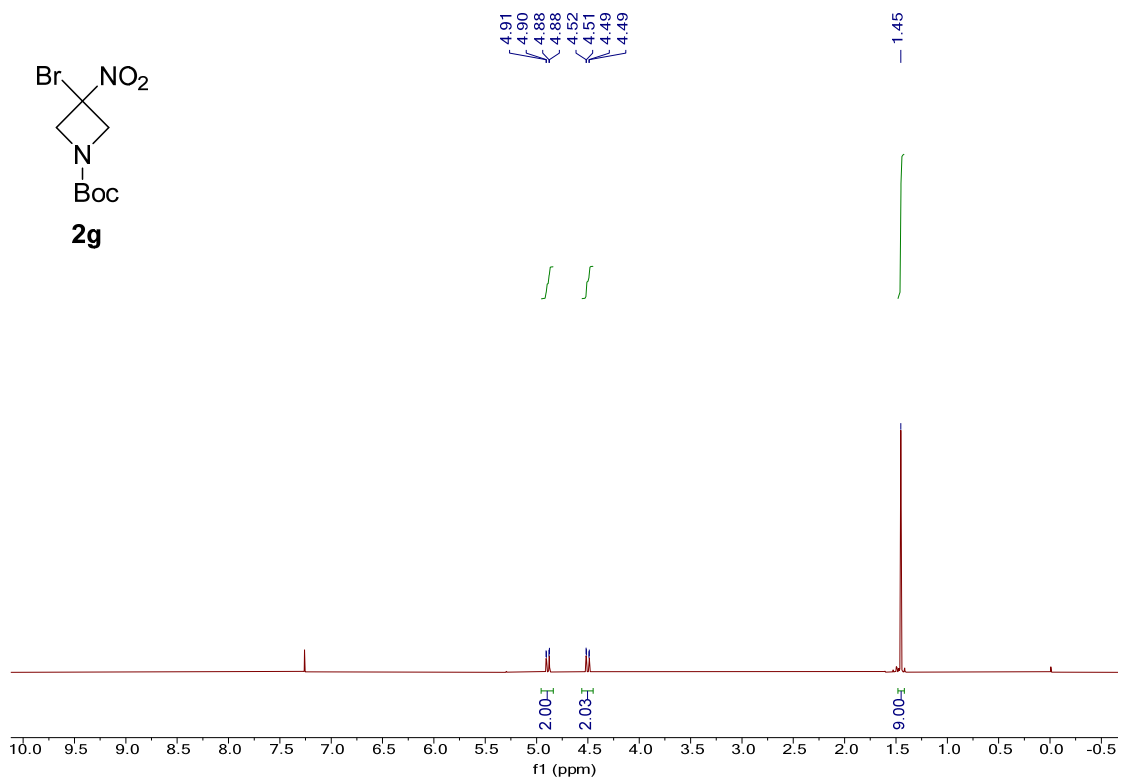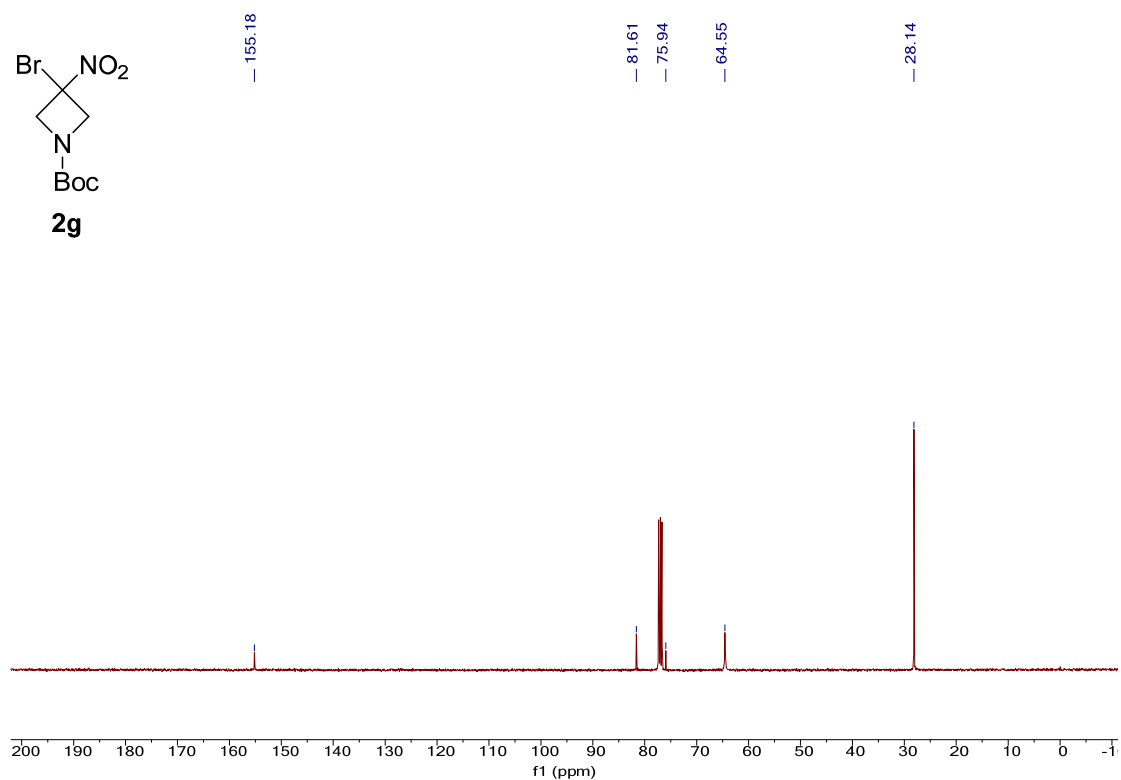



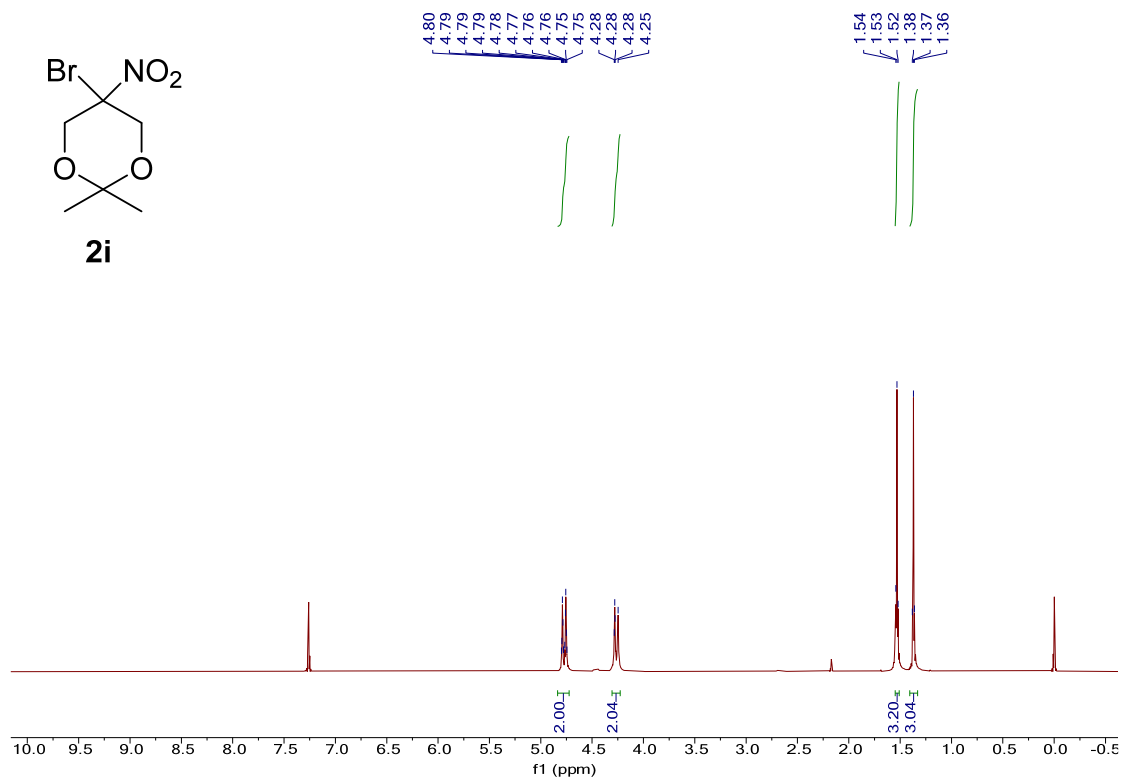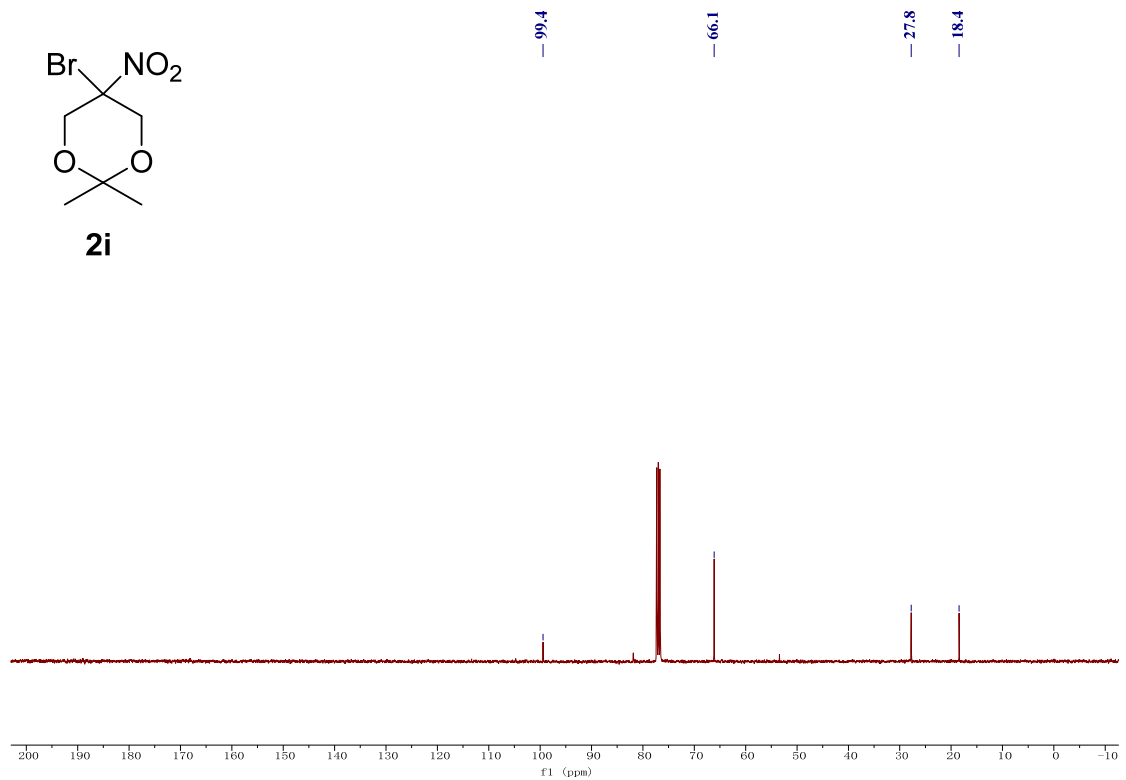

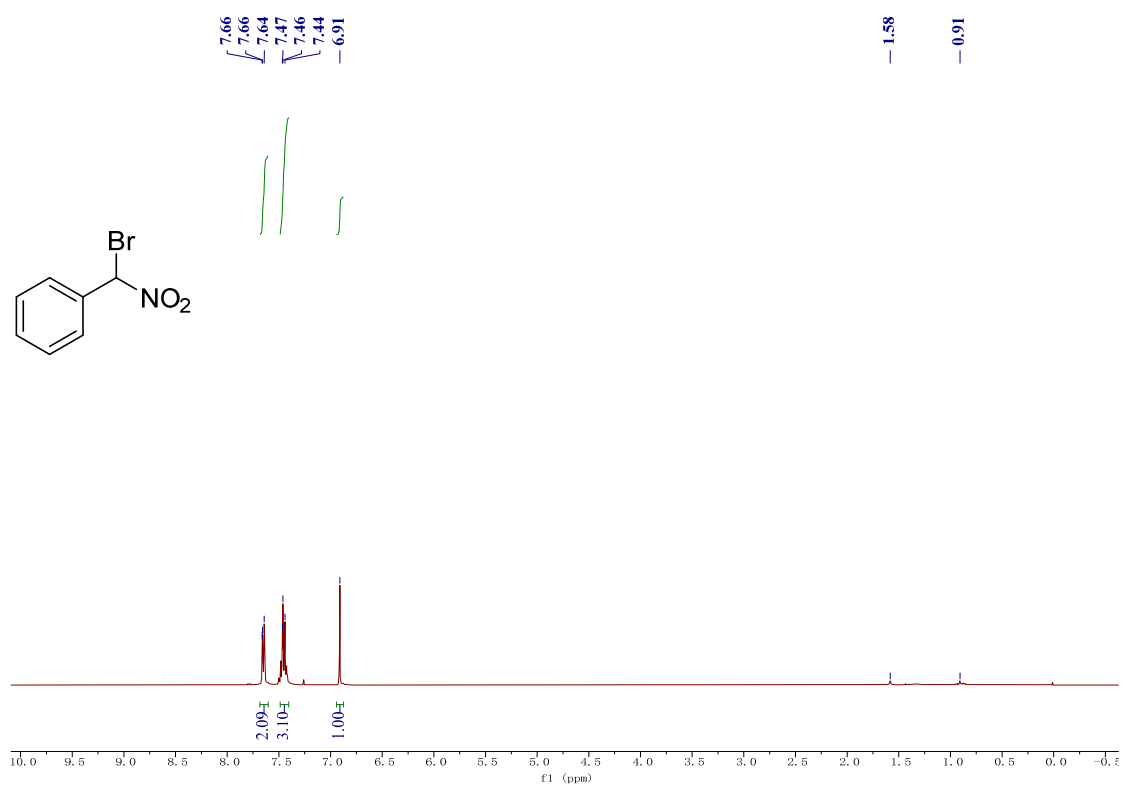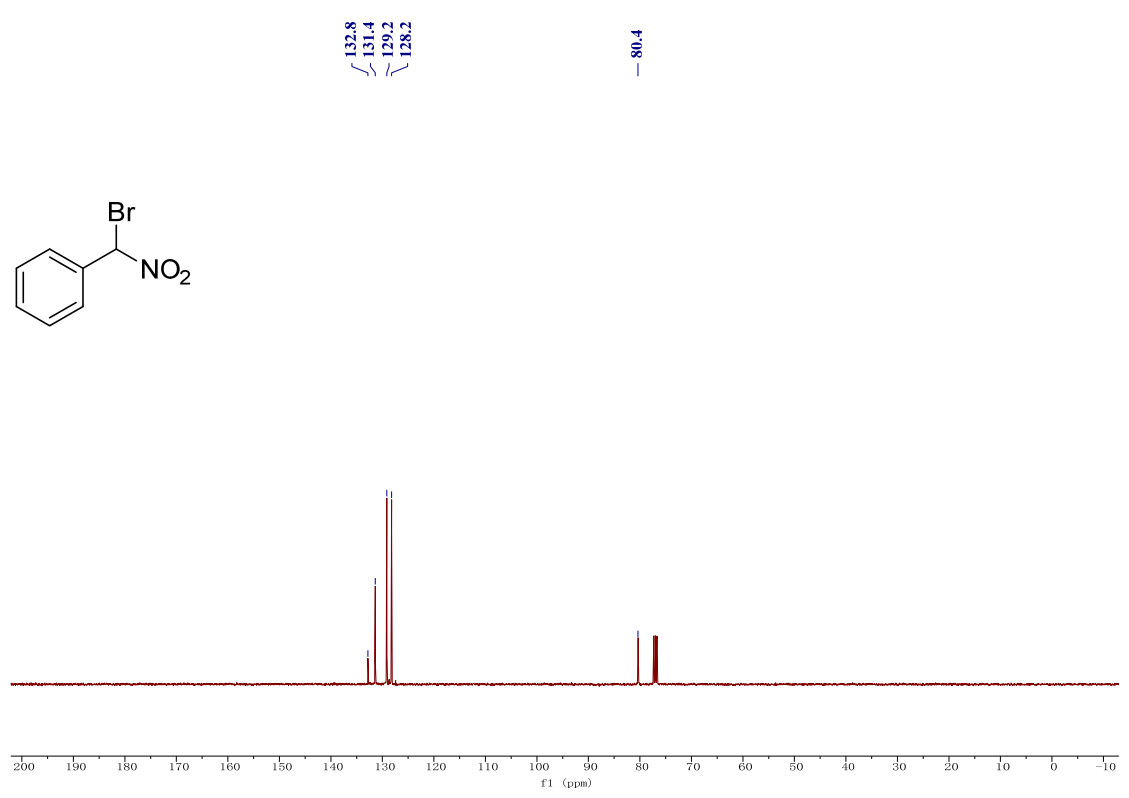



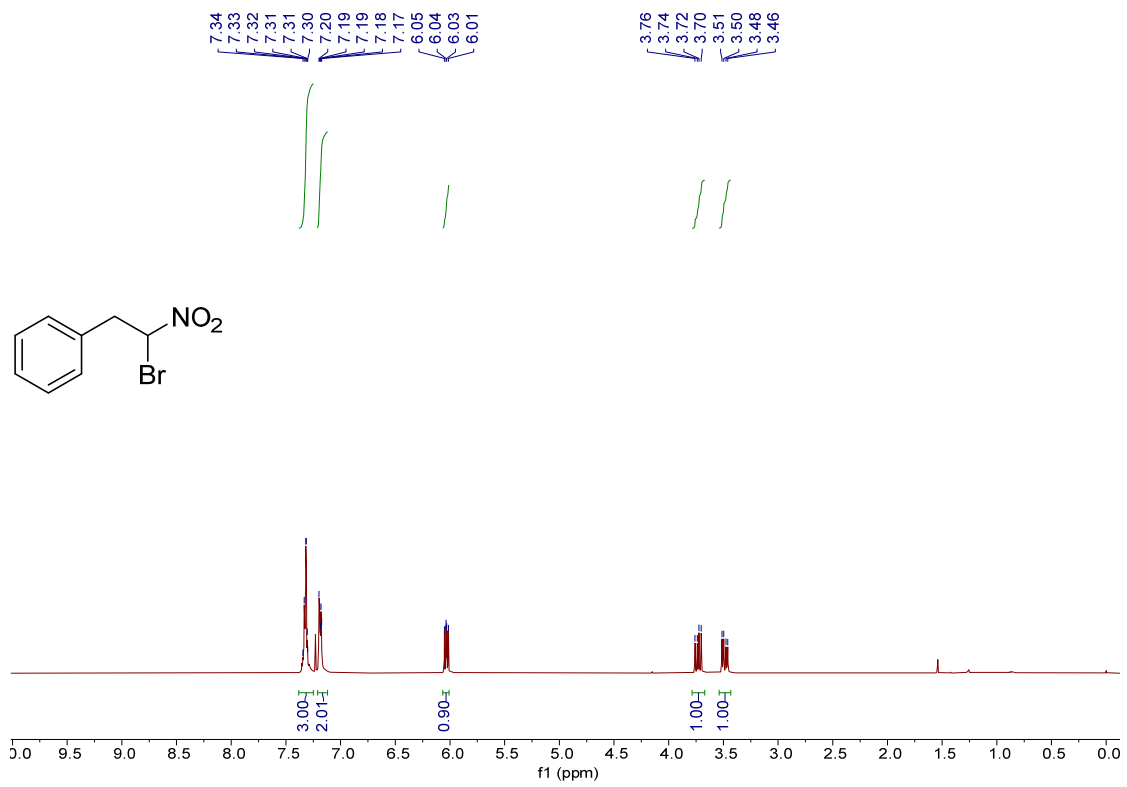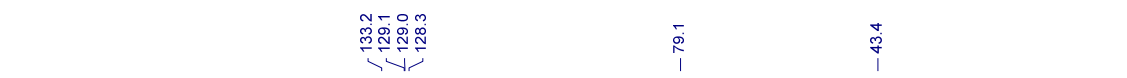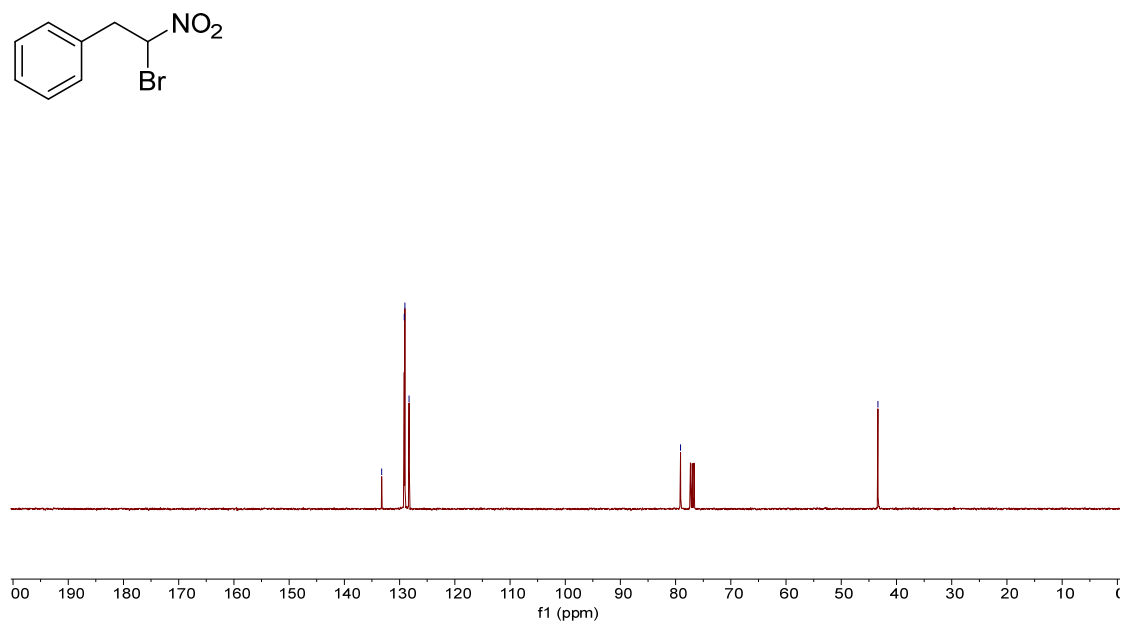

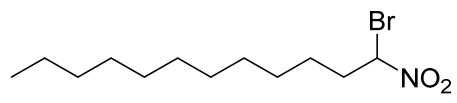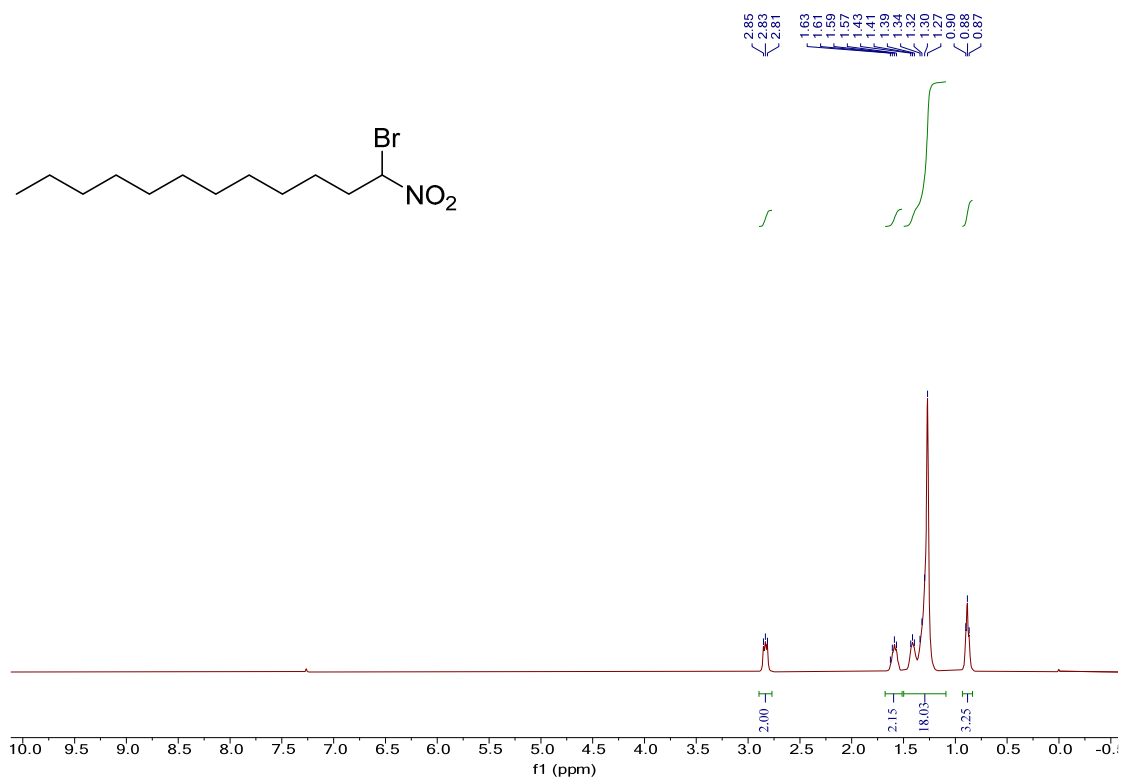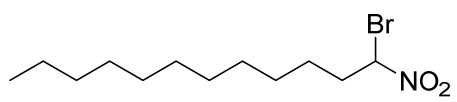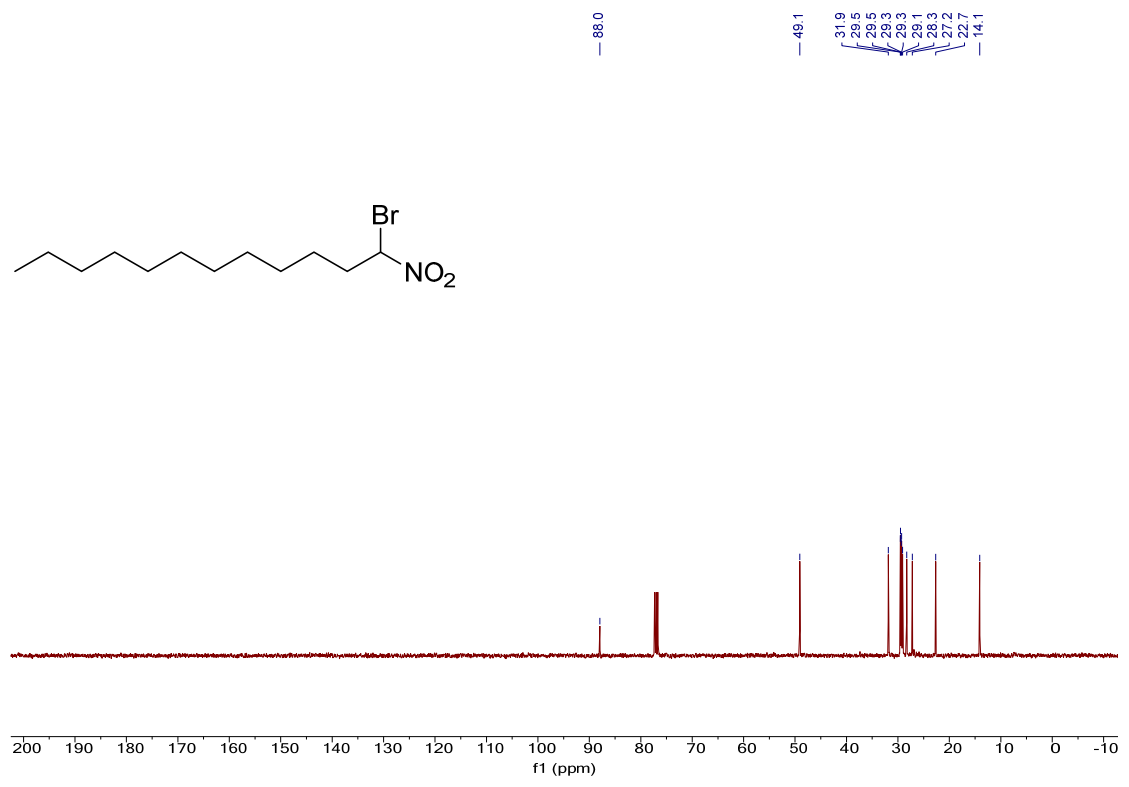

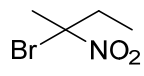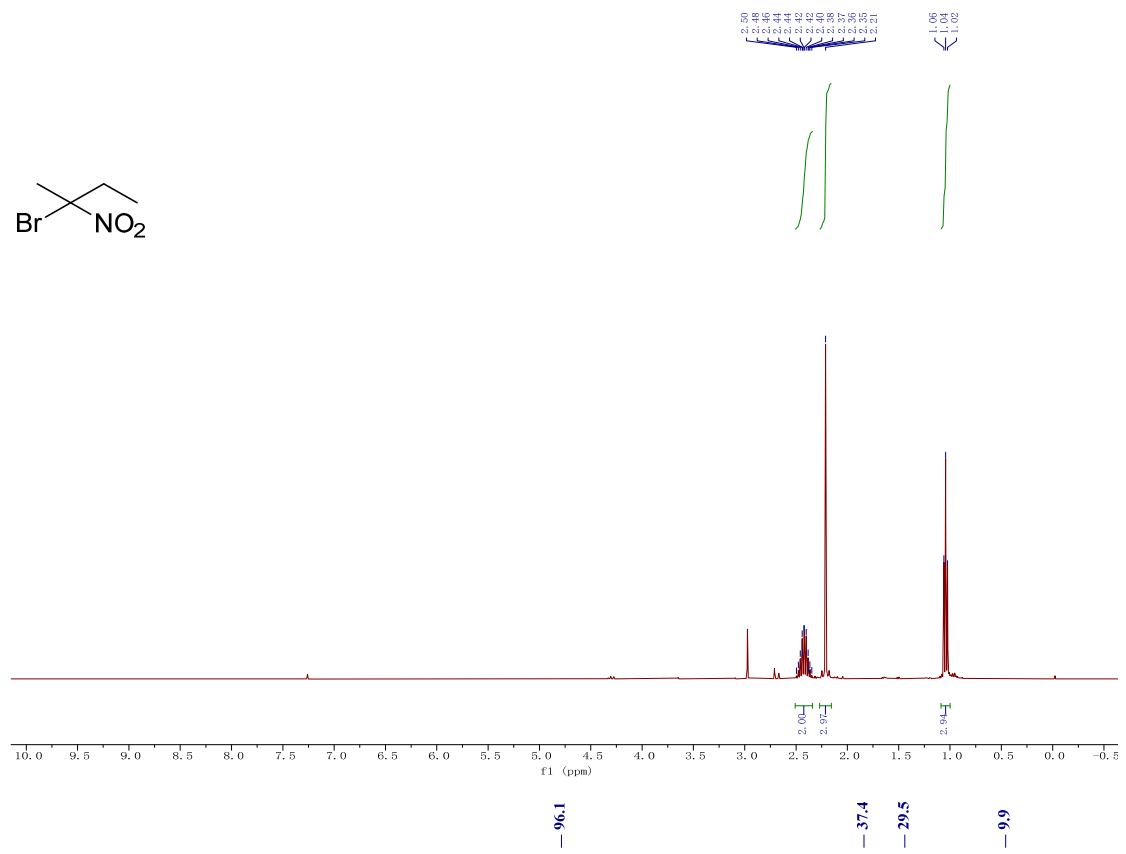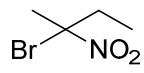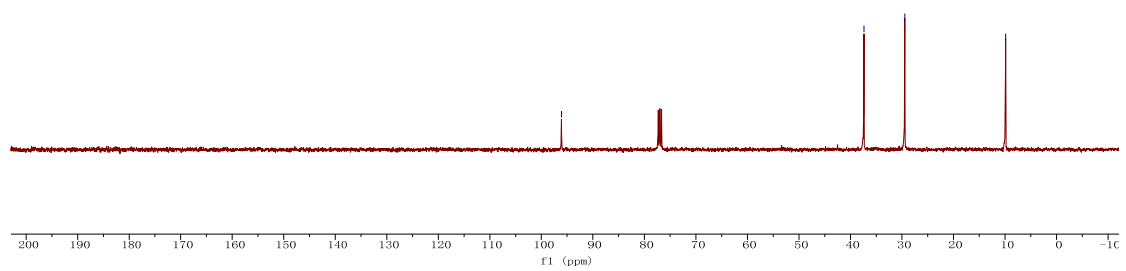

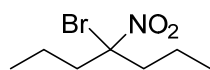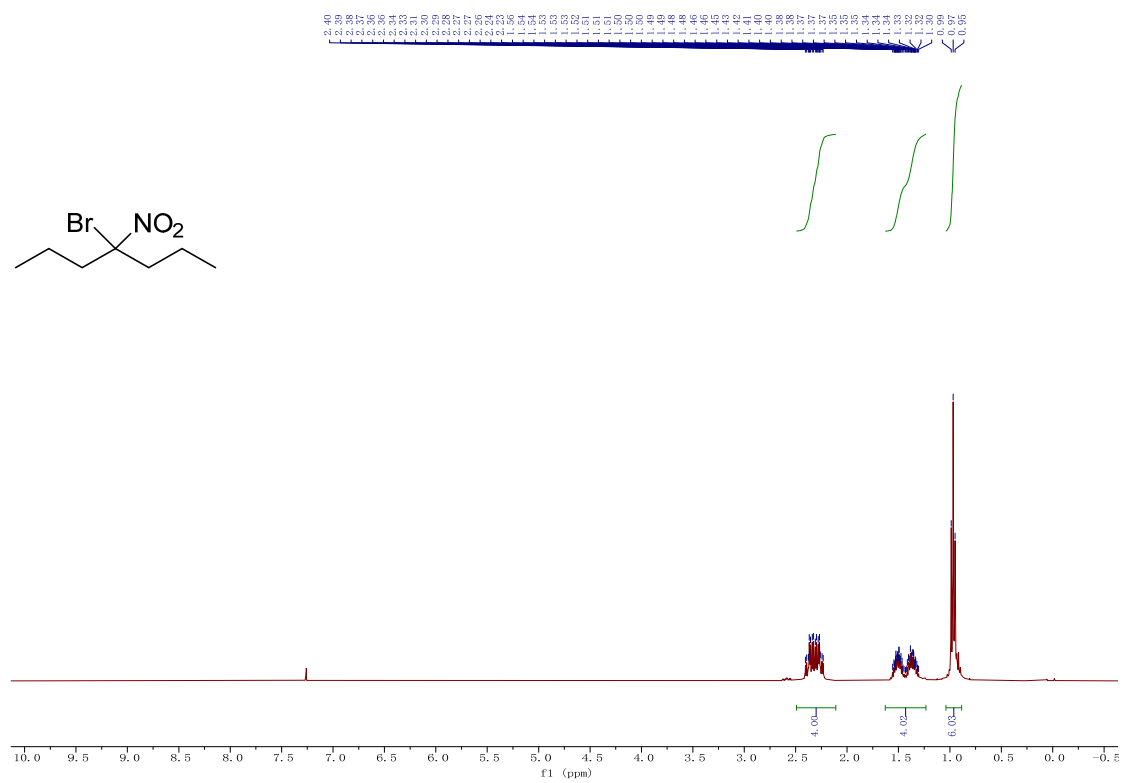

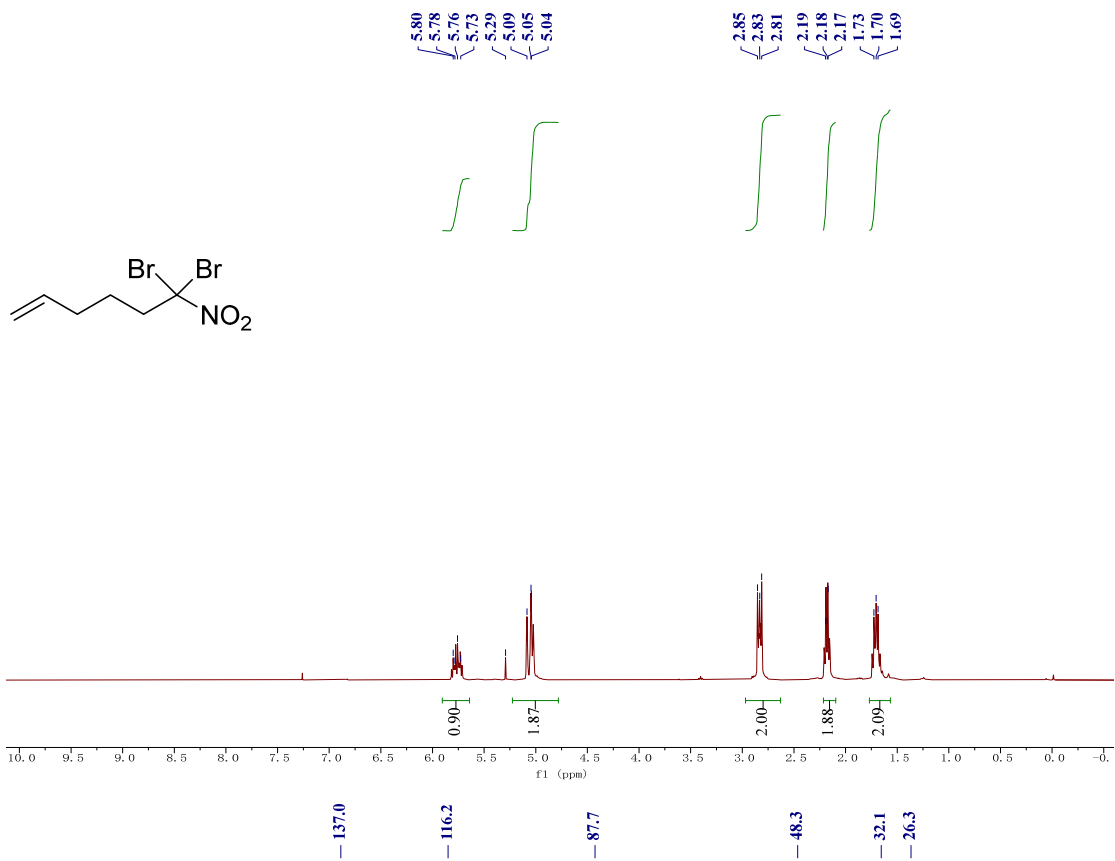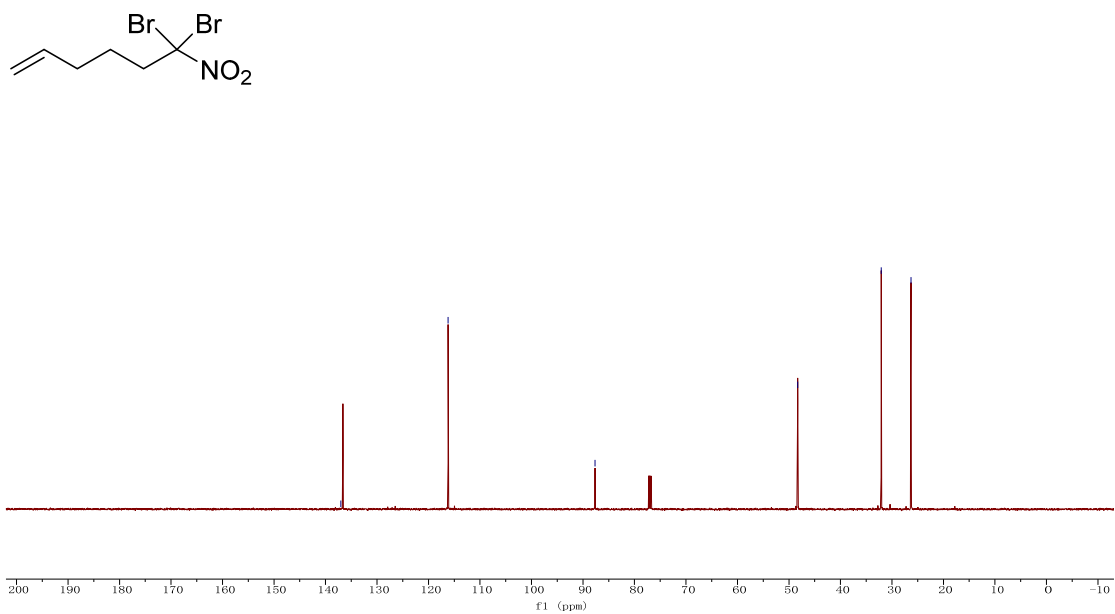



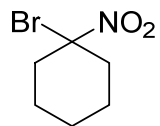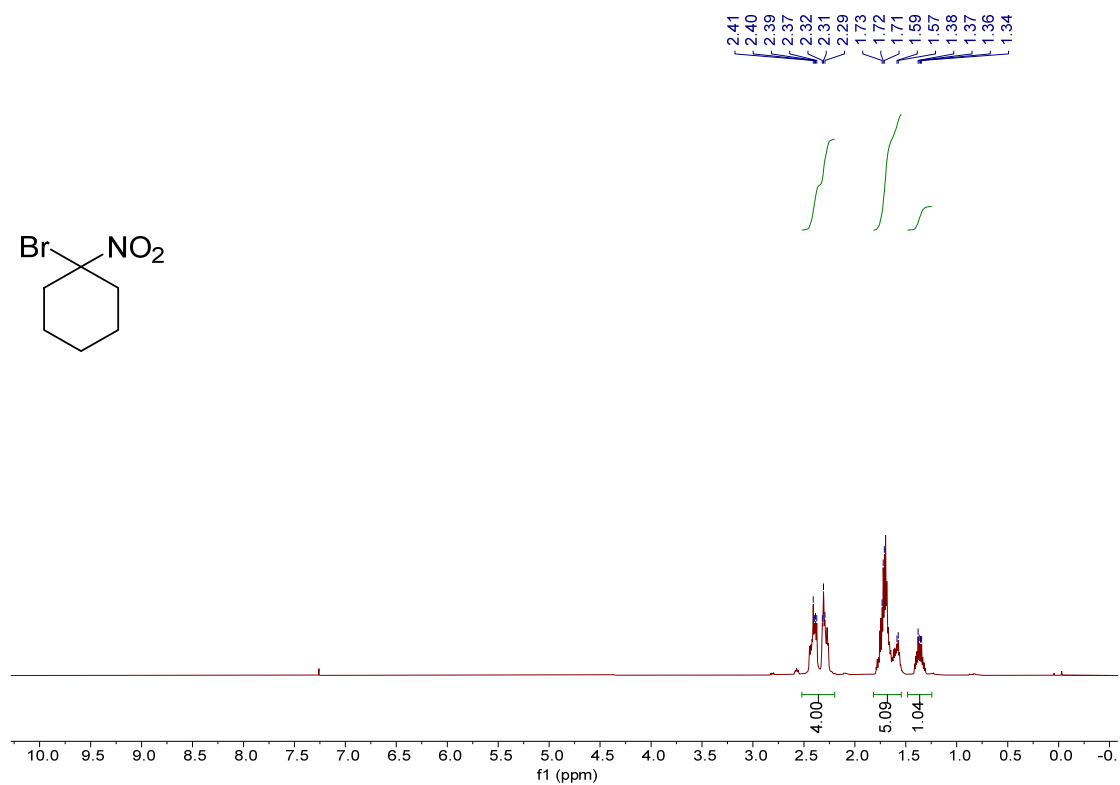

-103.7

-38.2

23.8  
22.9

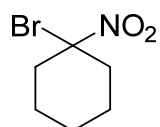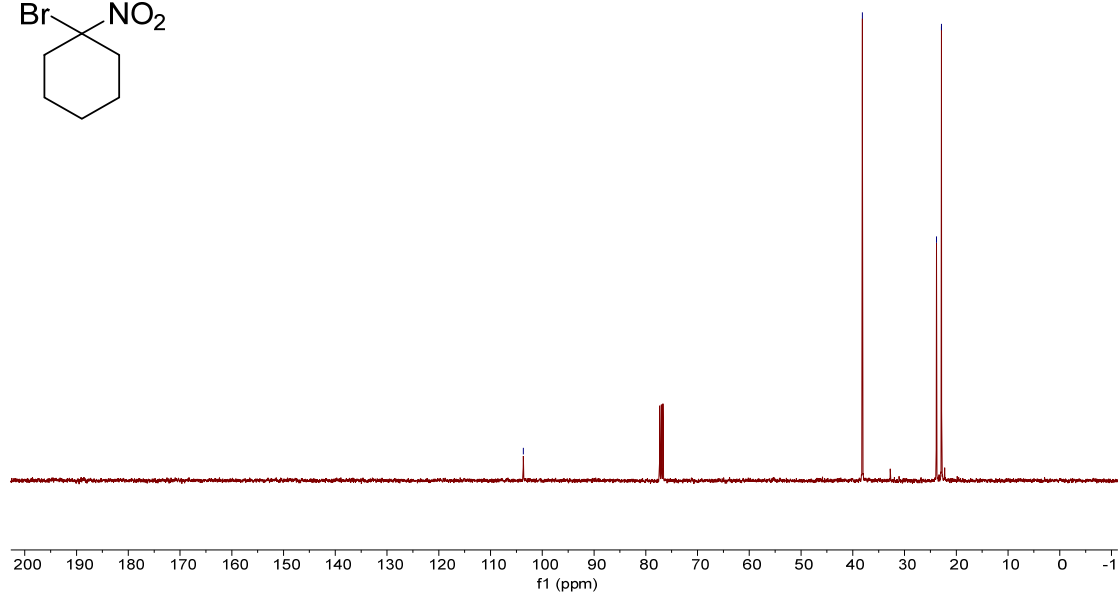

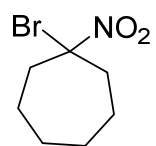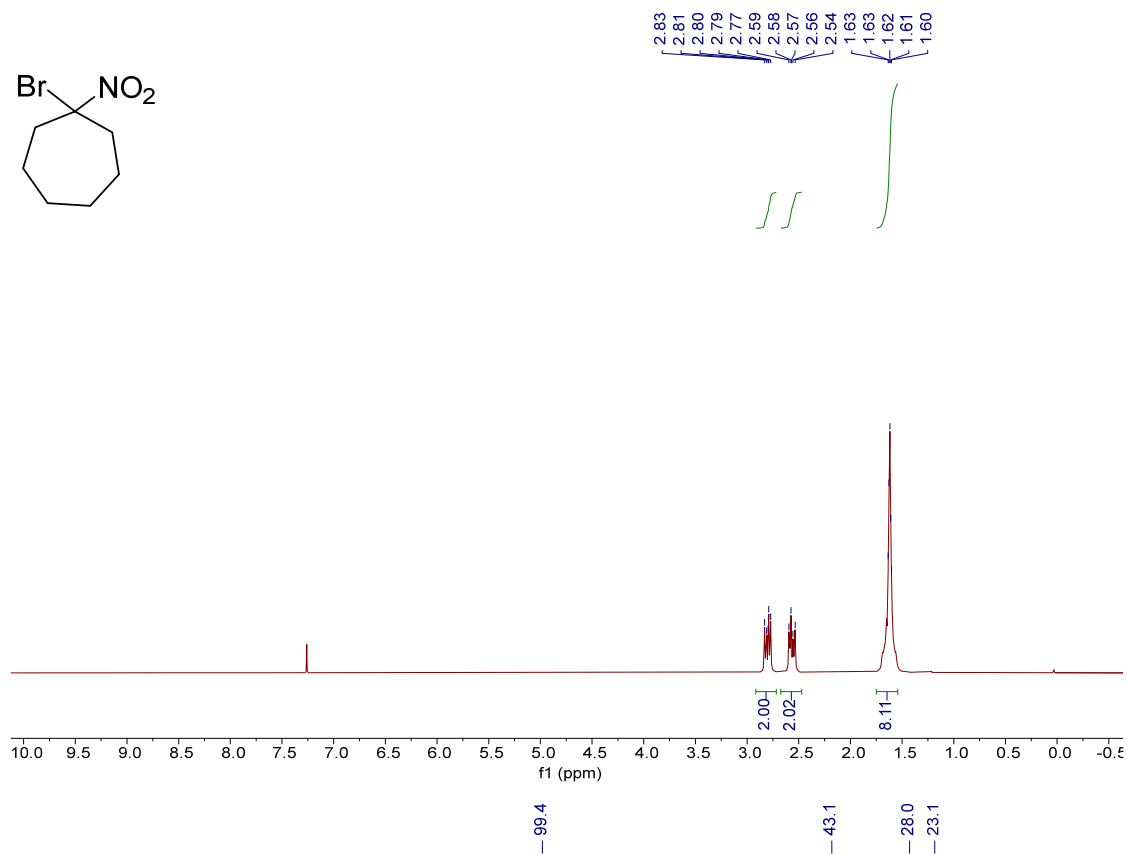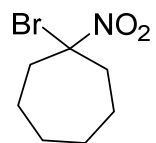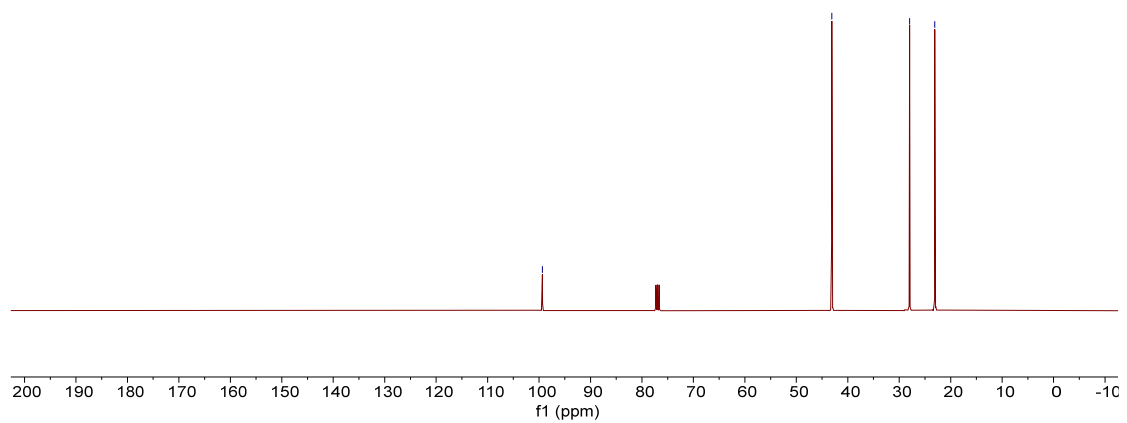



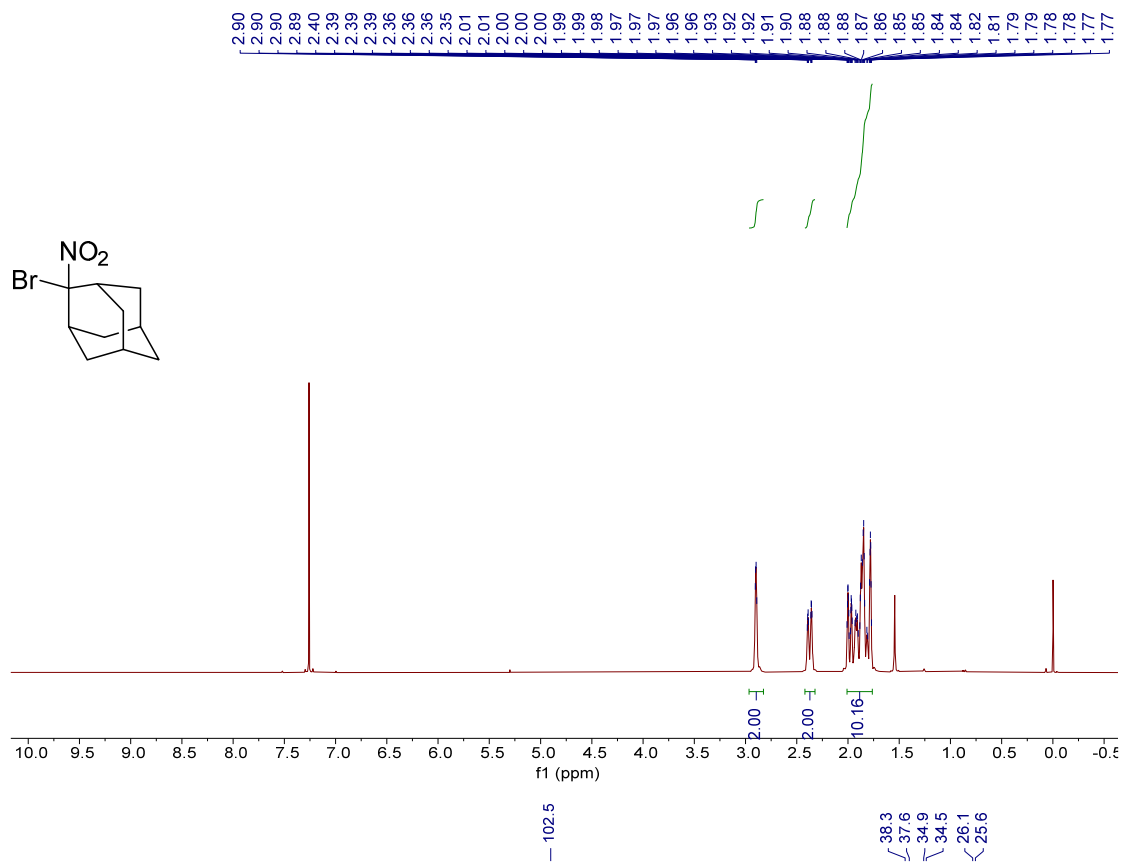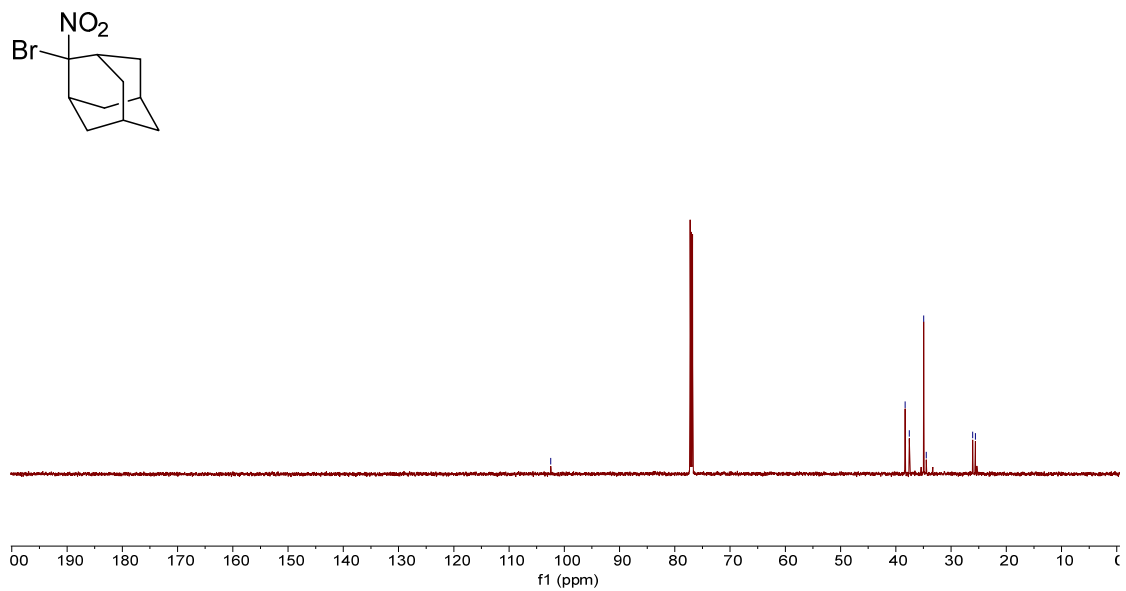



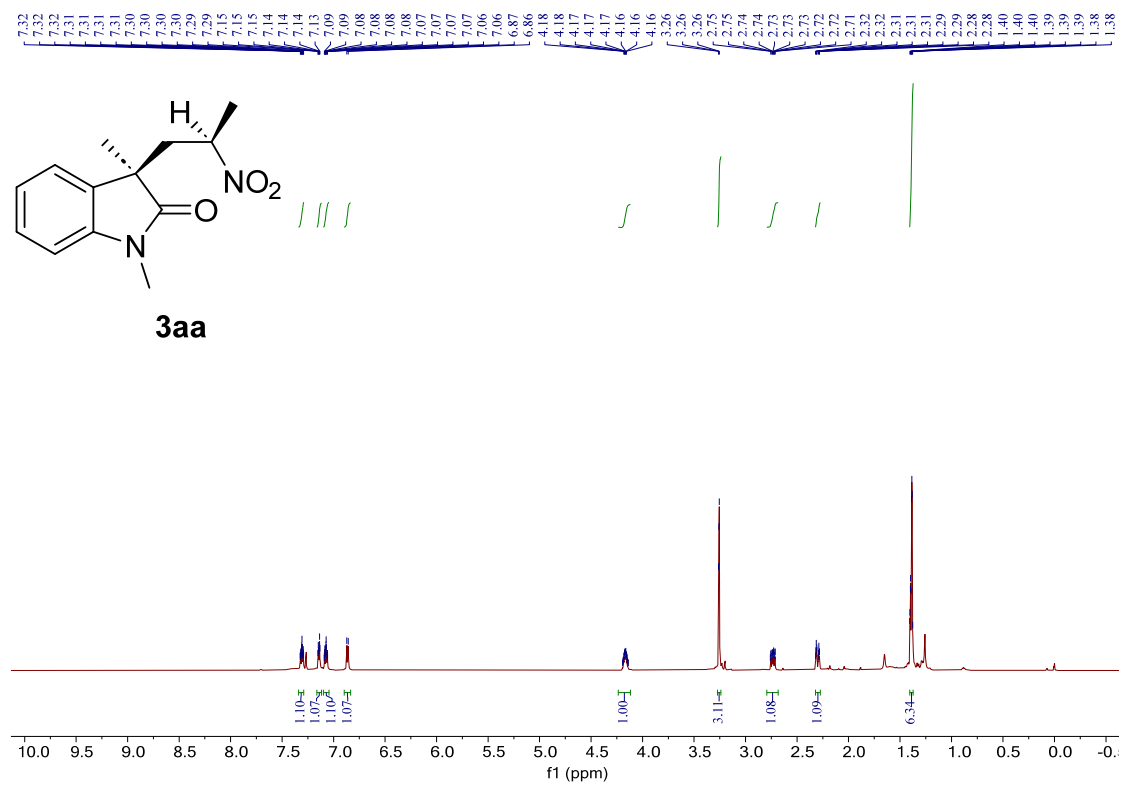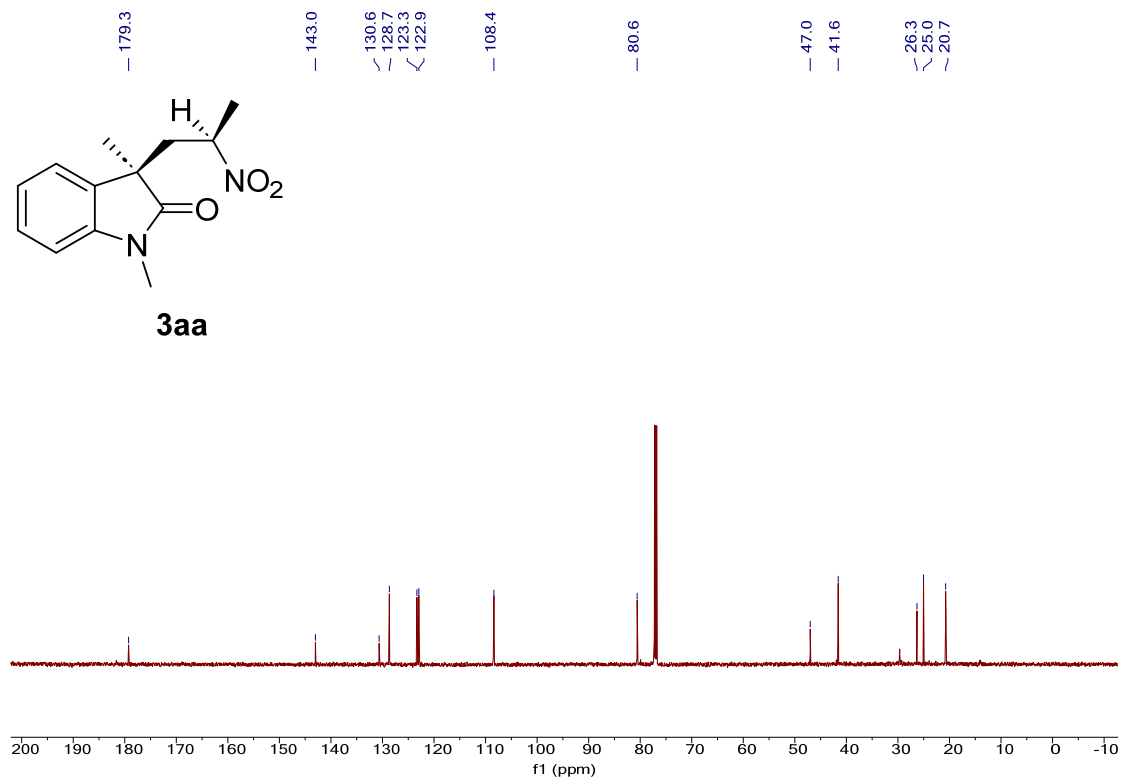

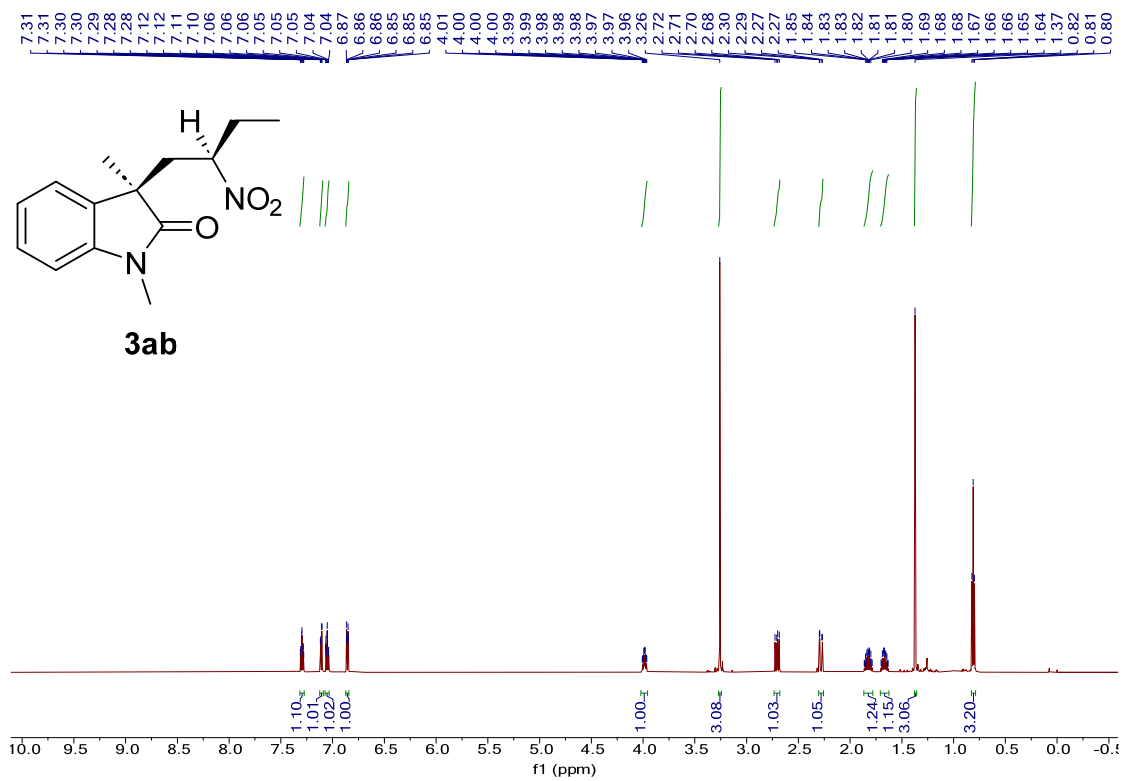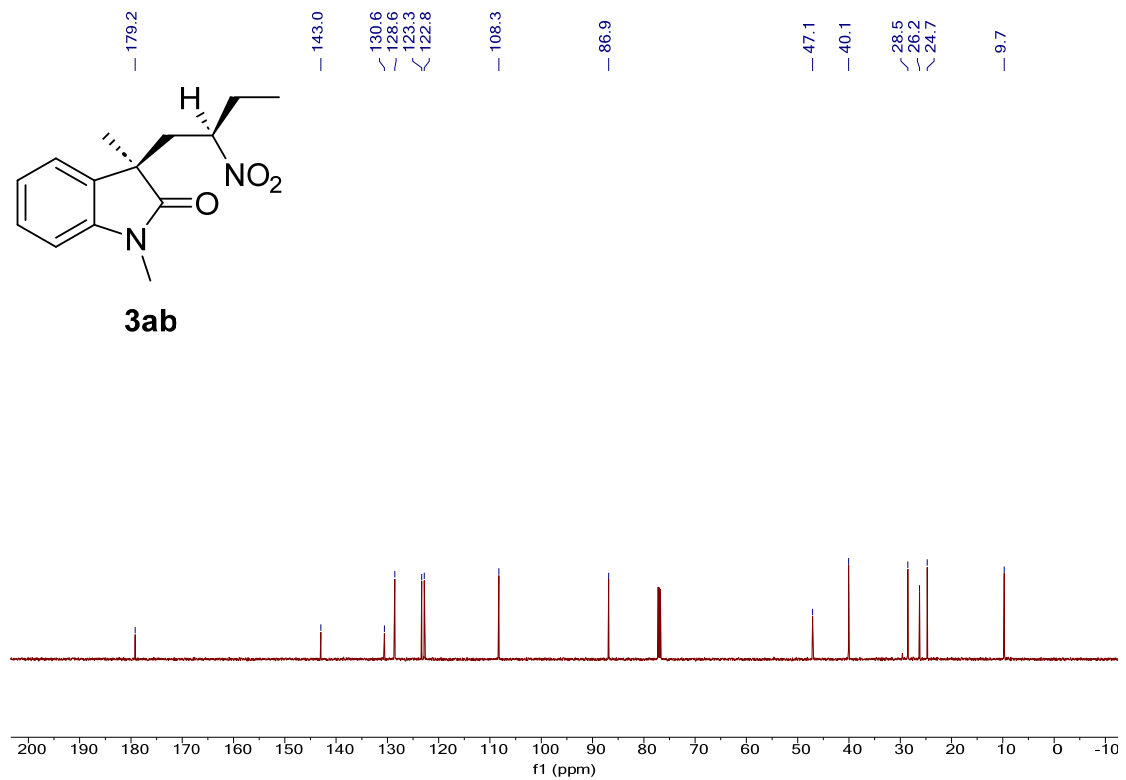

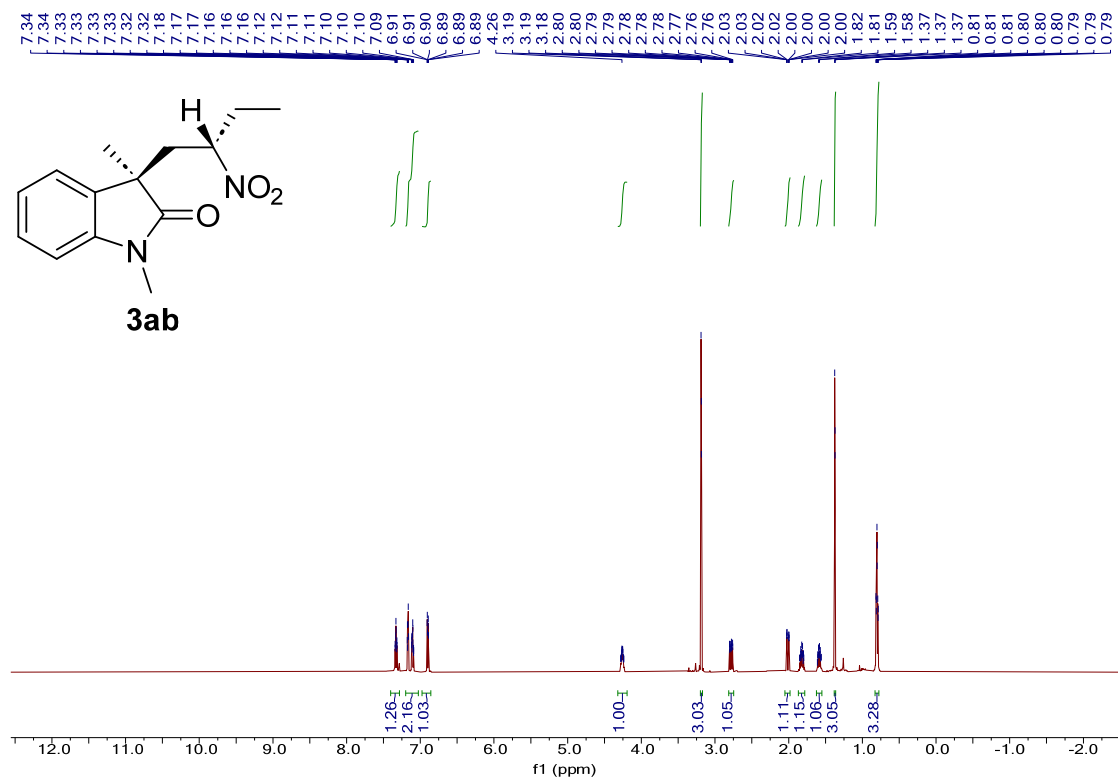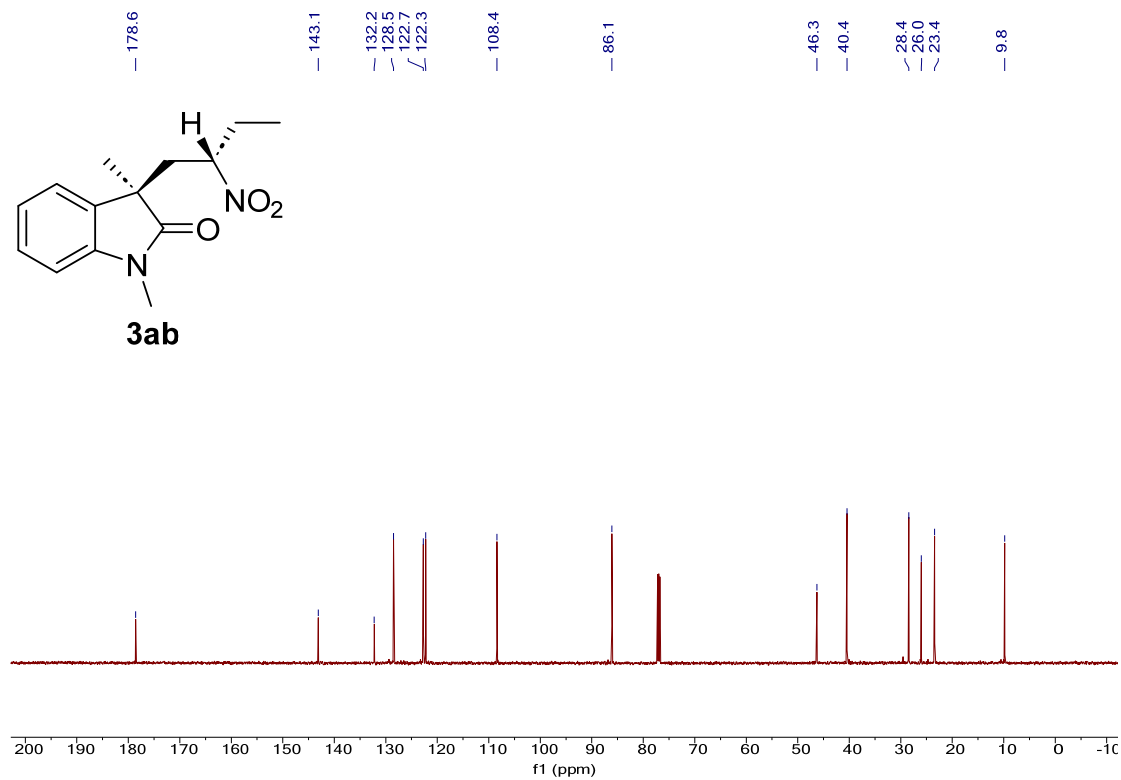

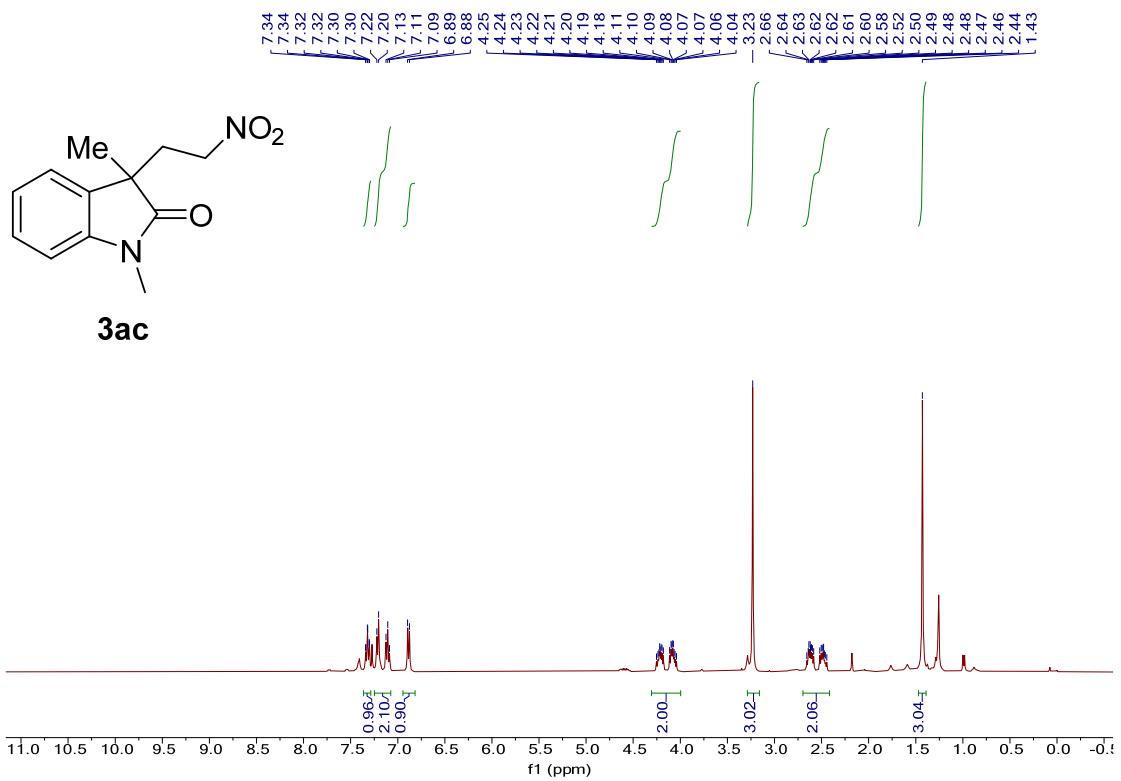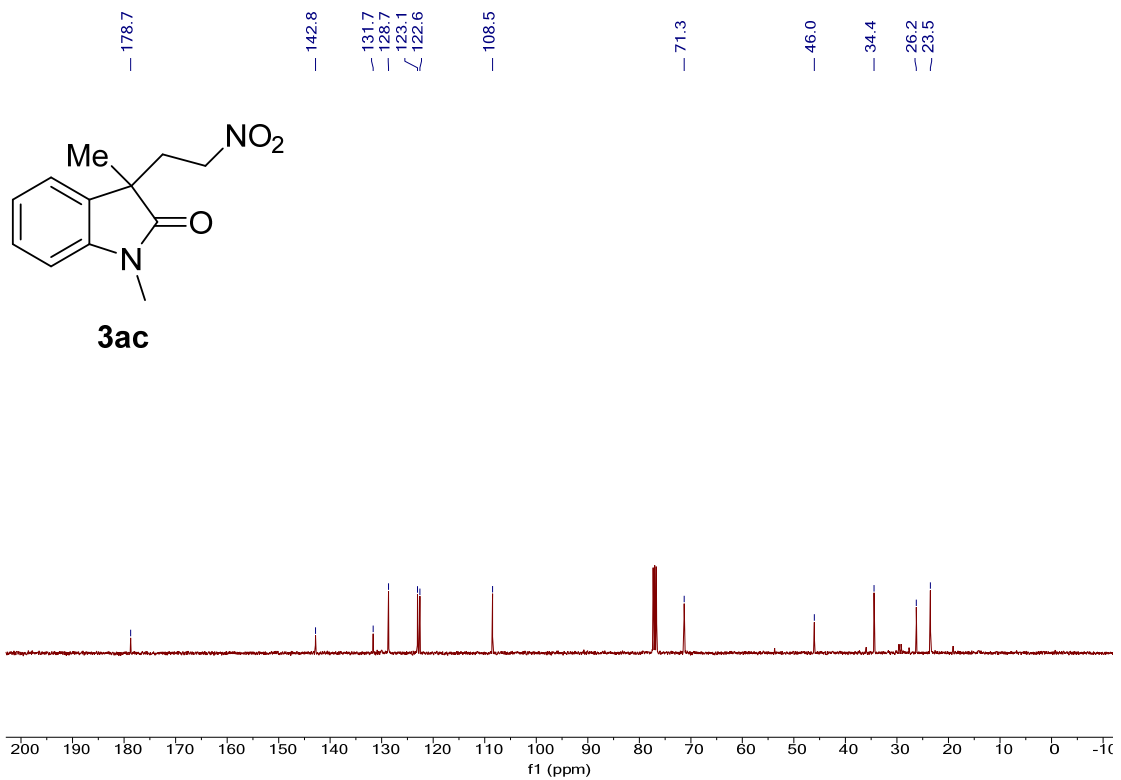

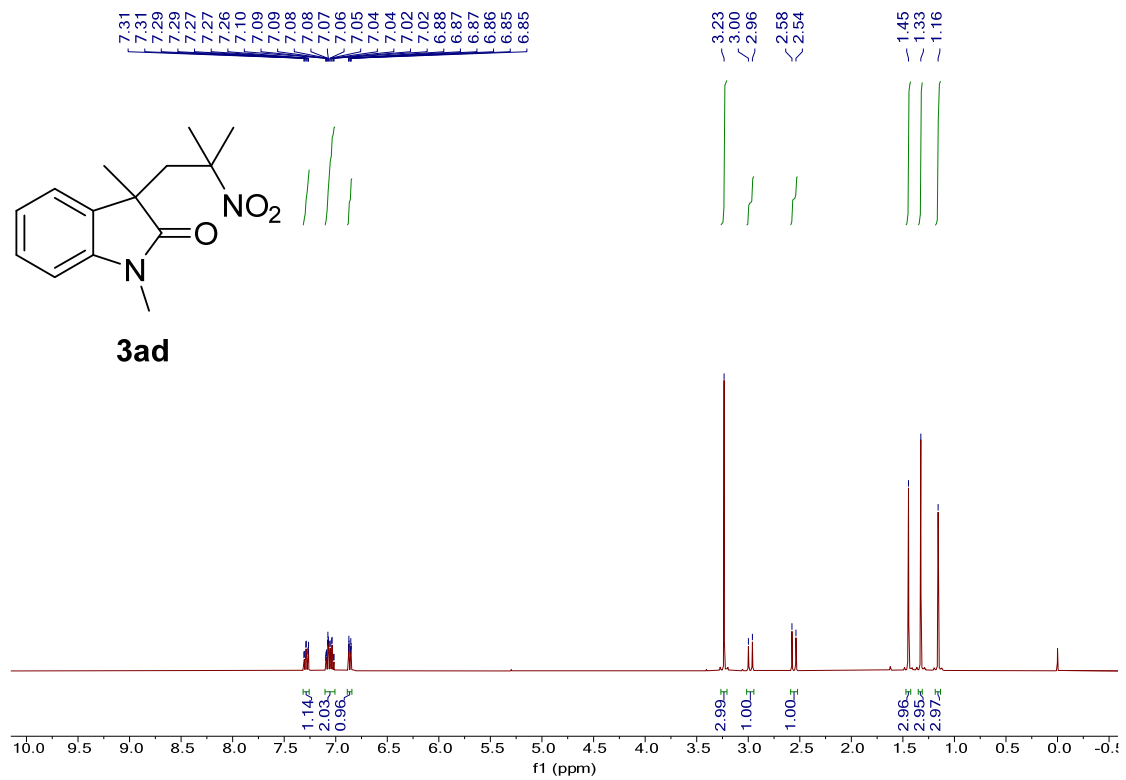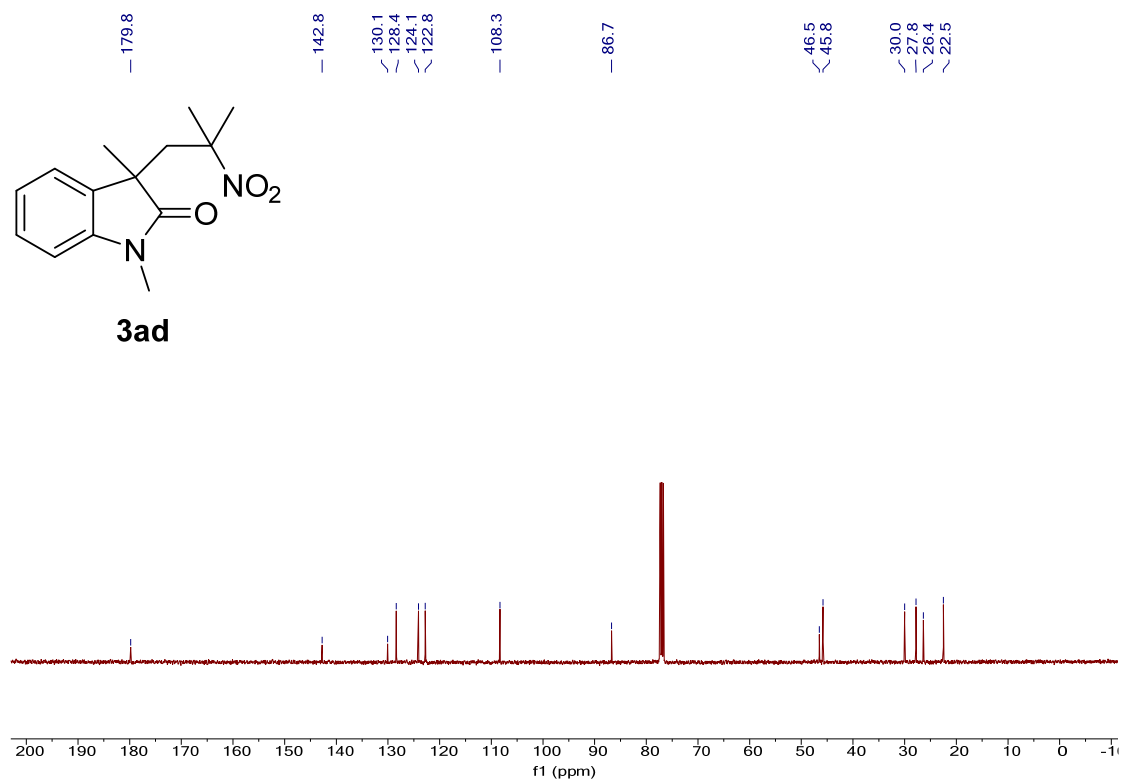

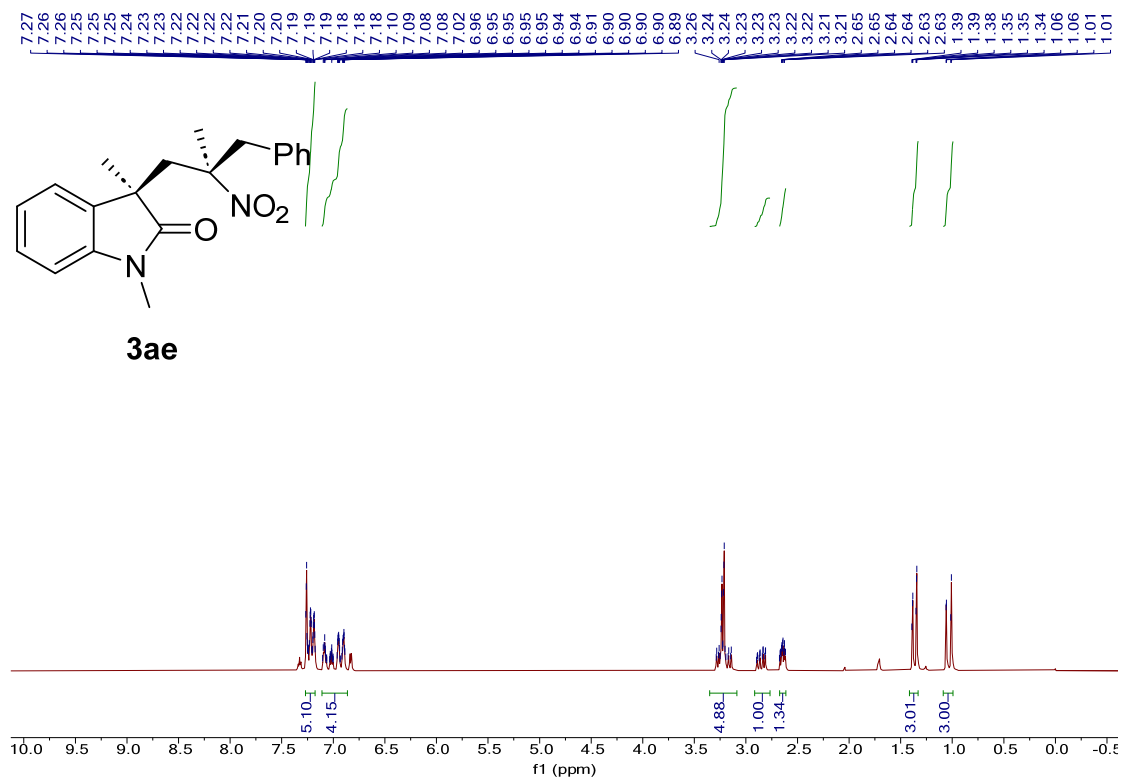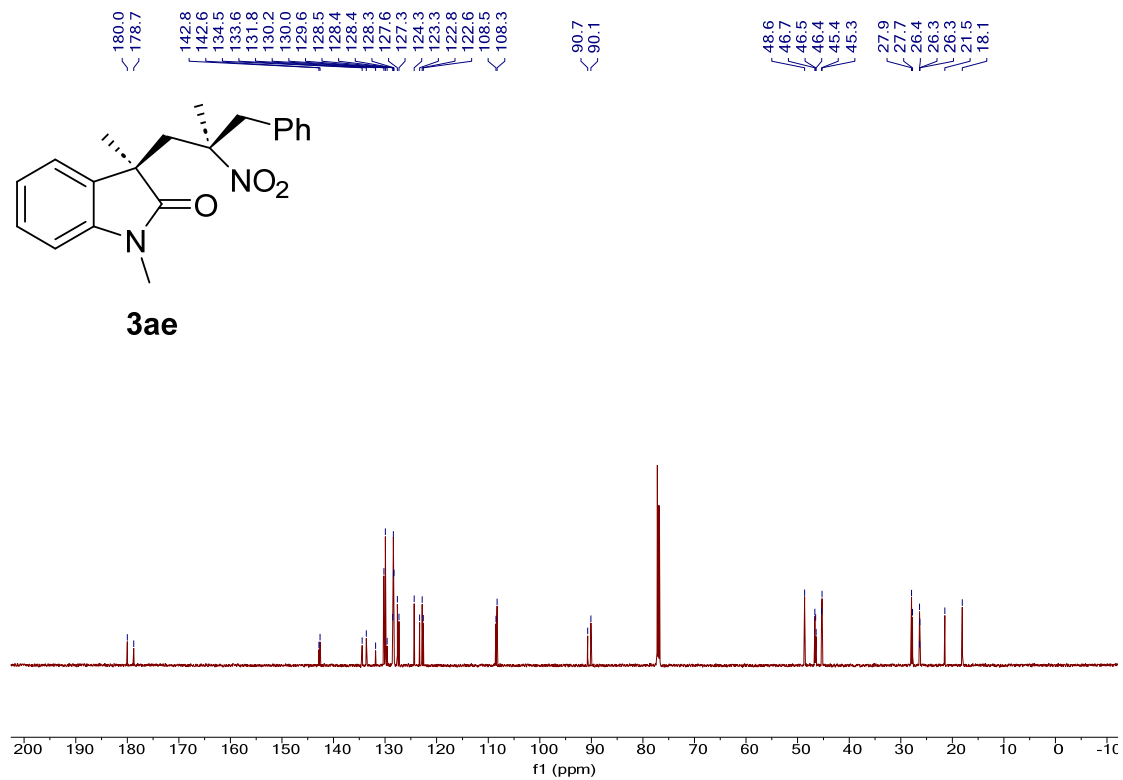



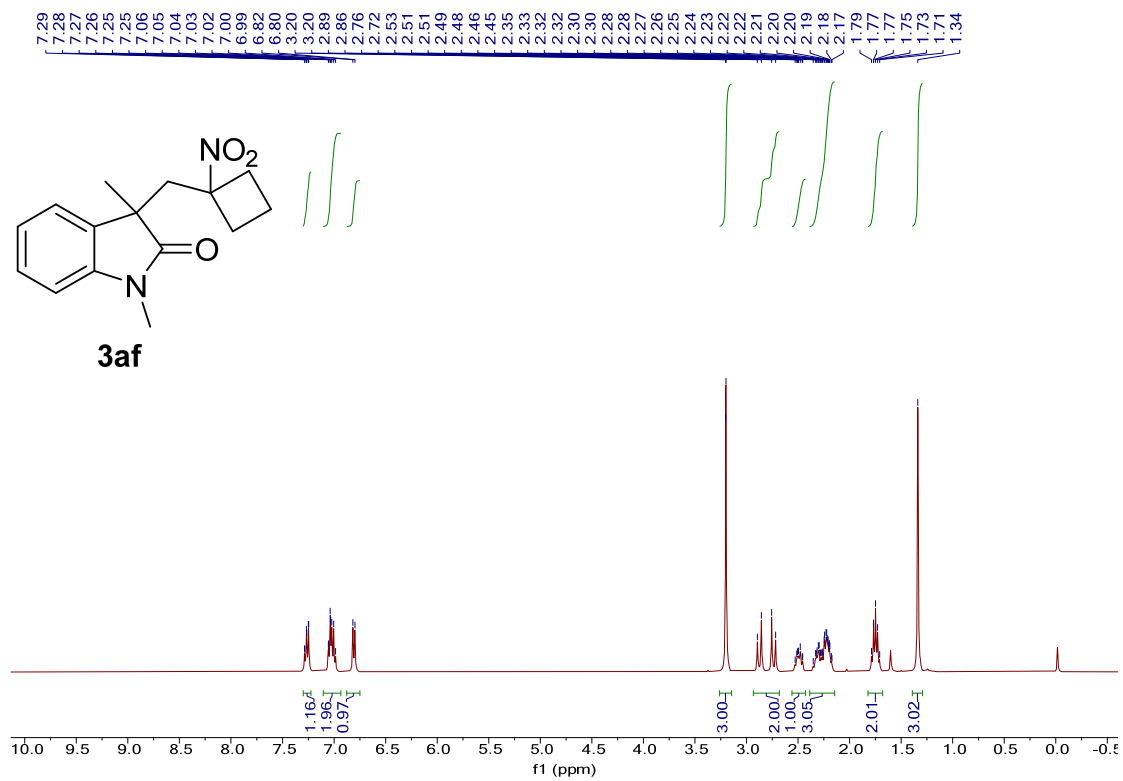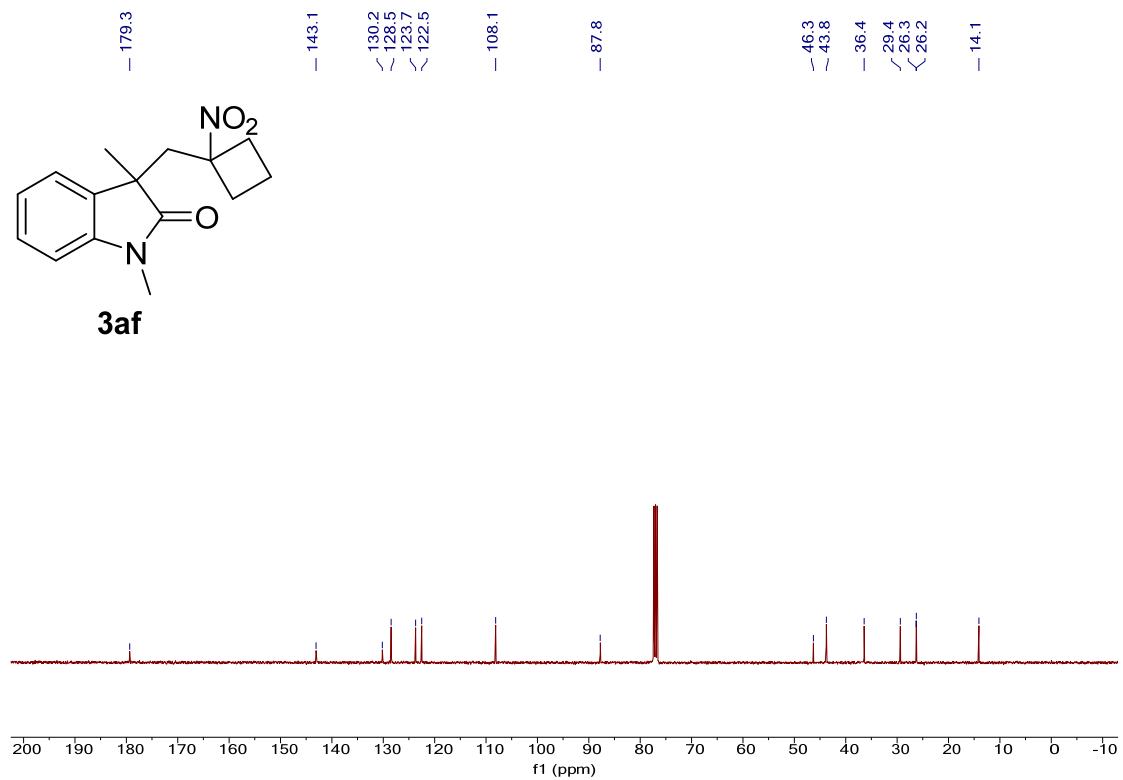

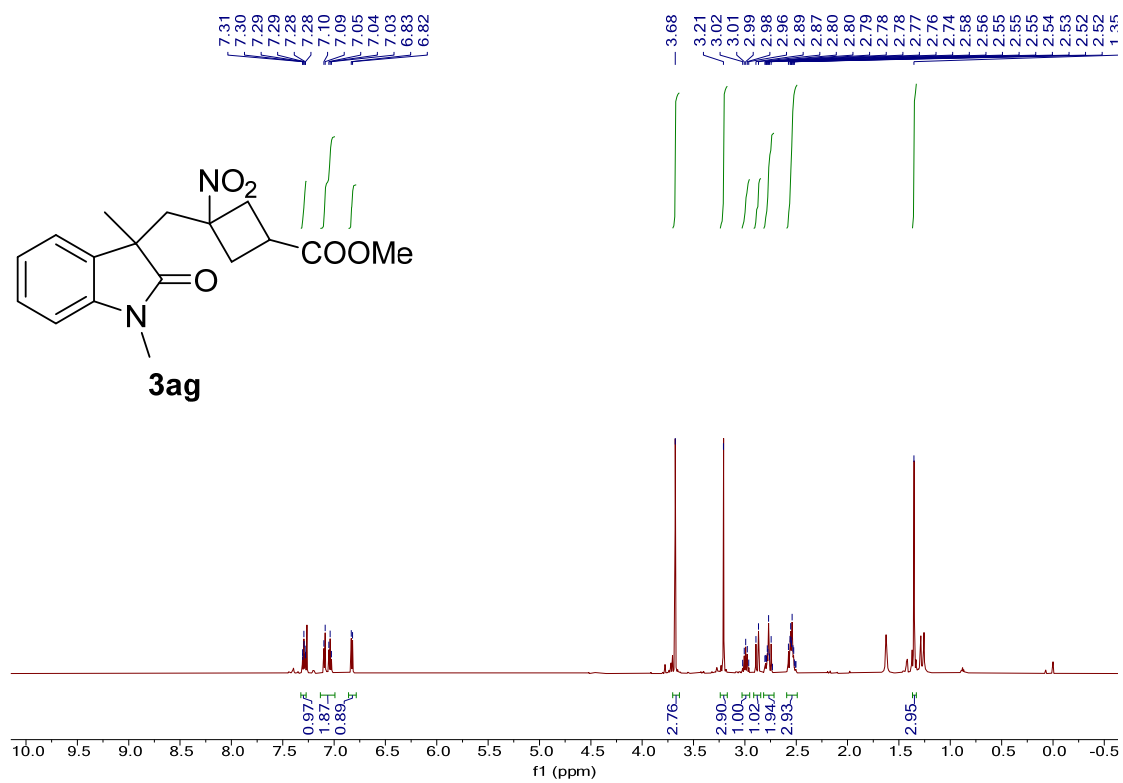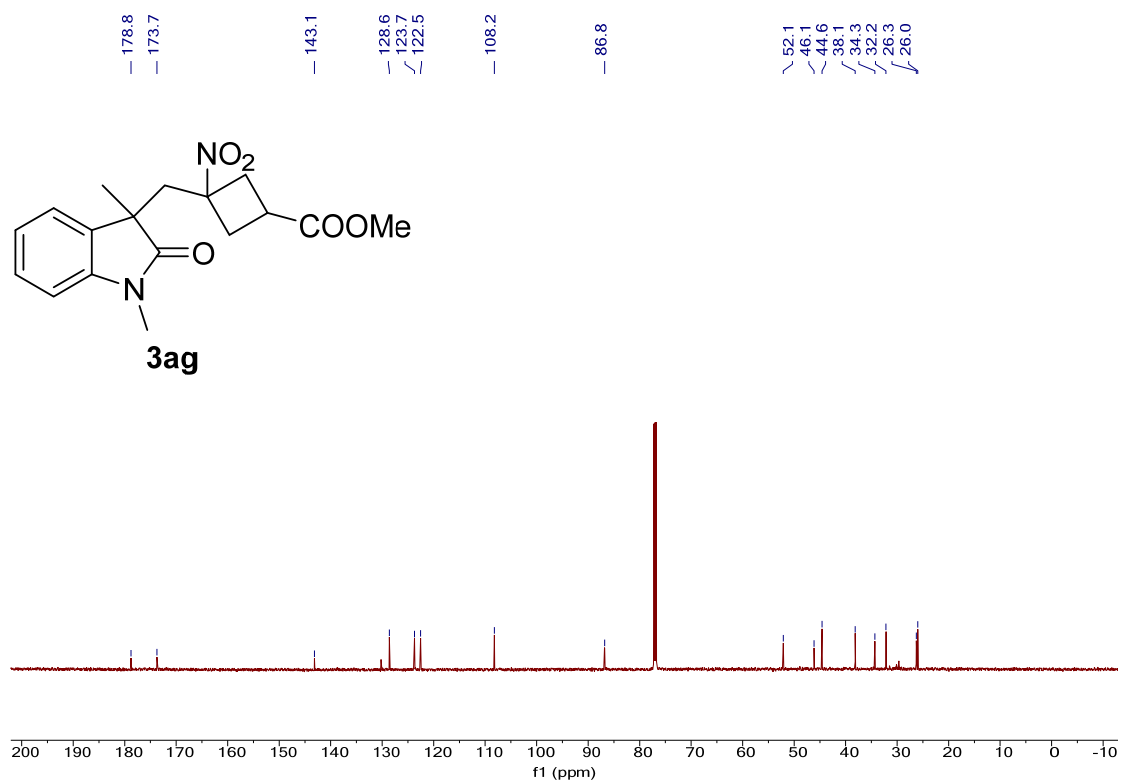

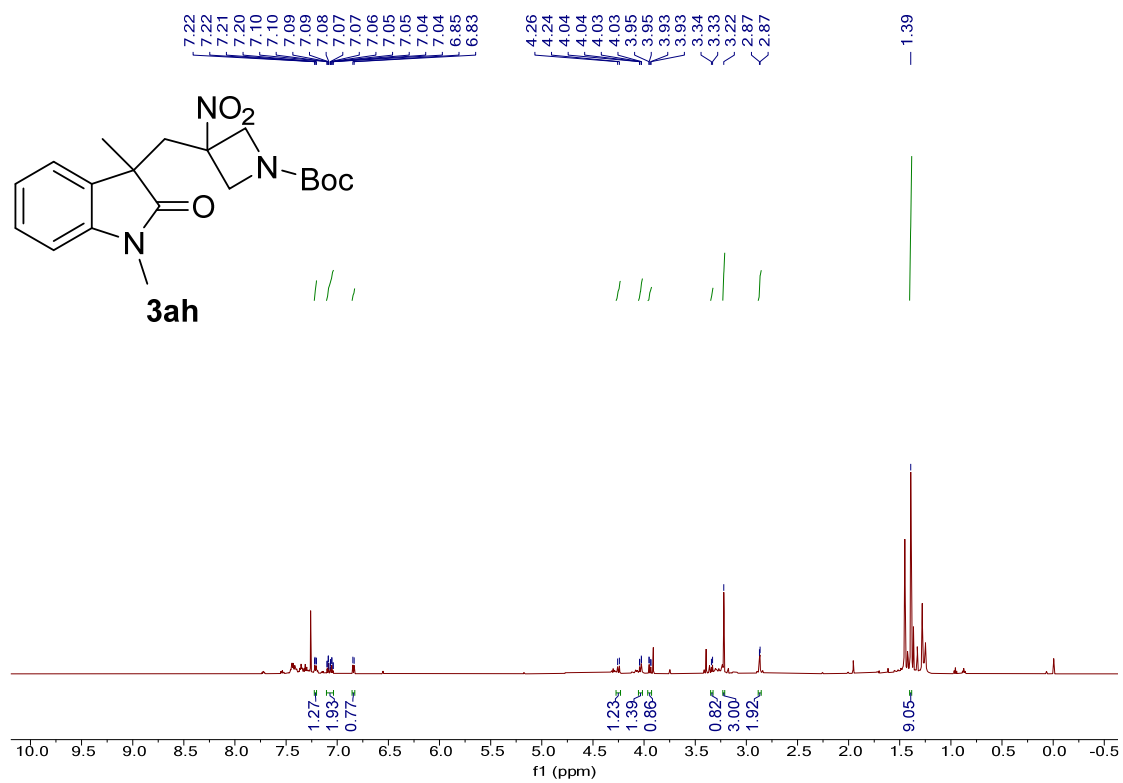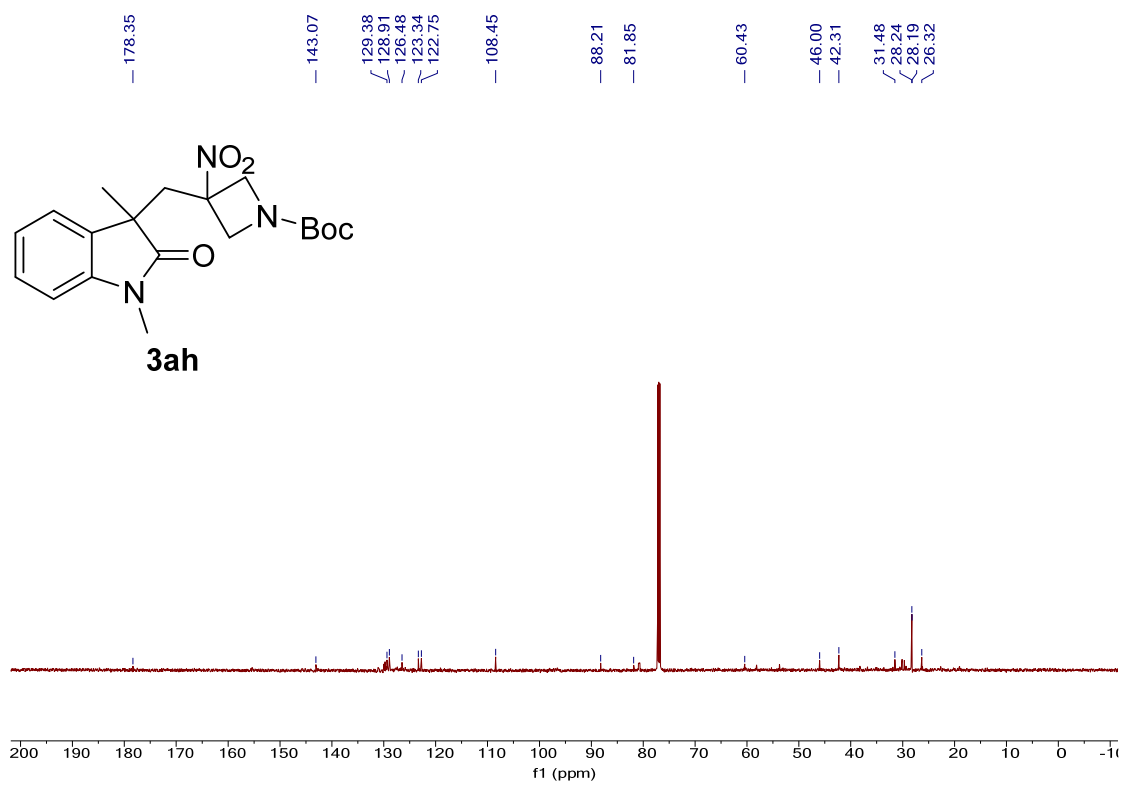

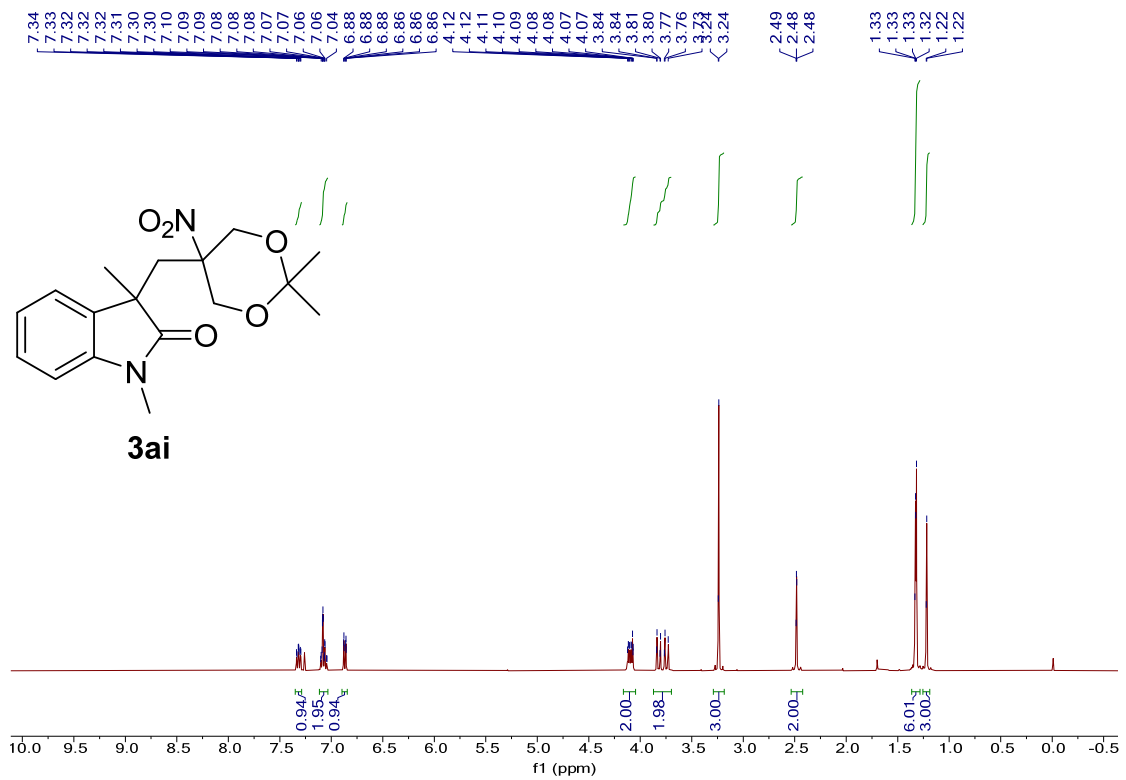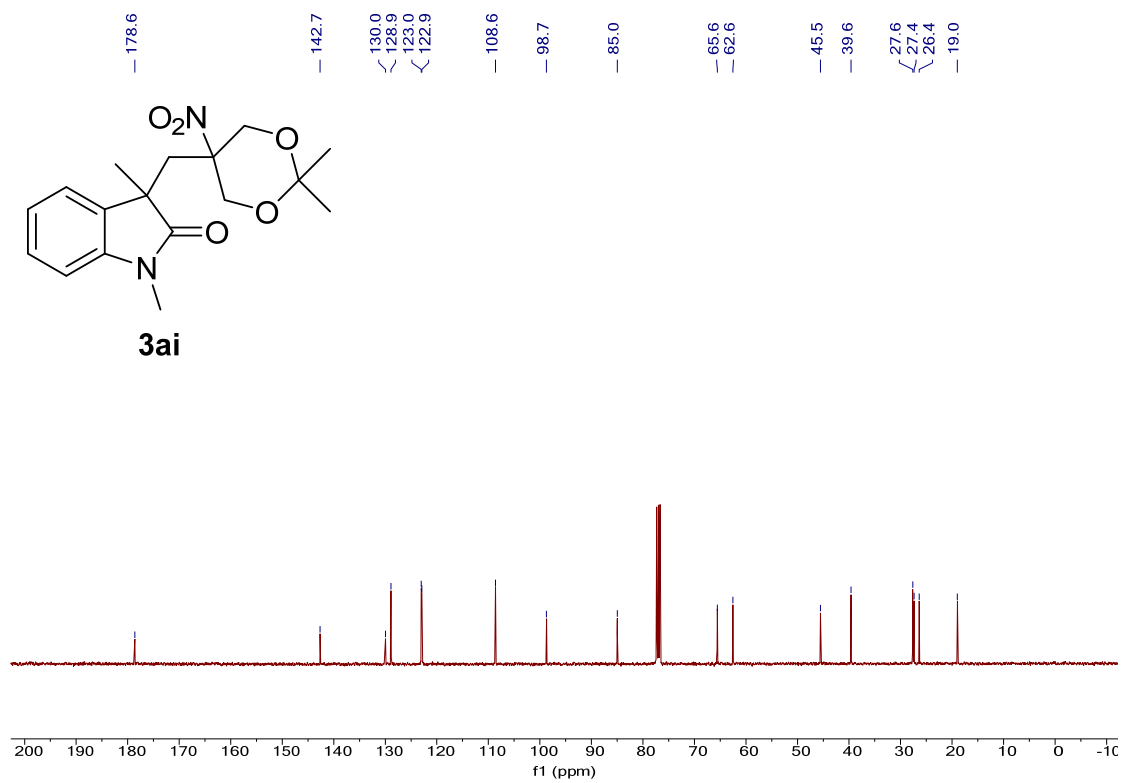

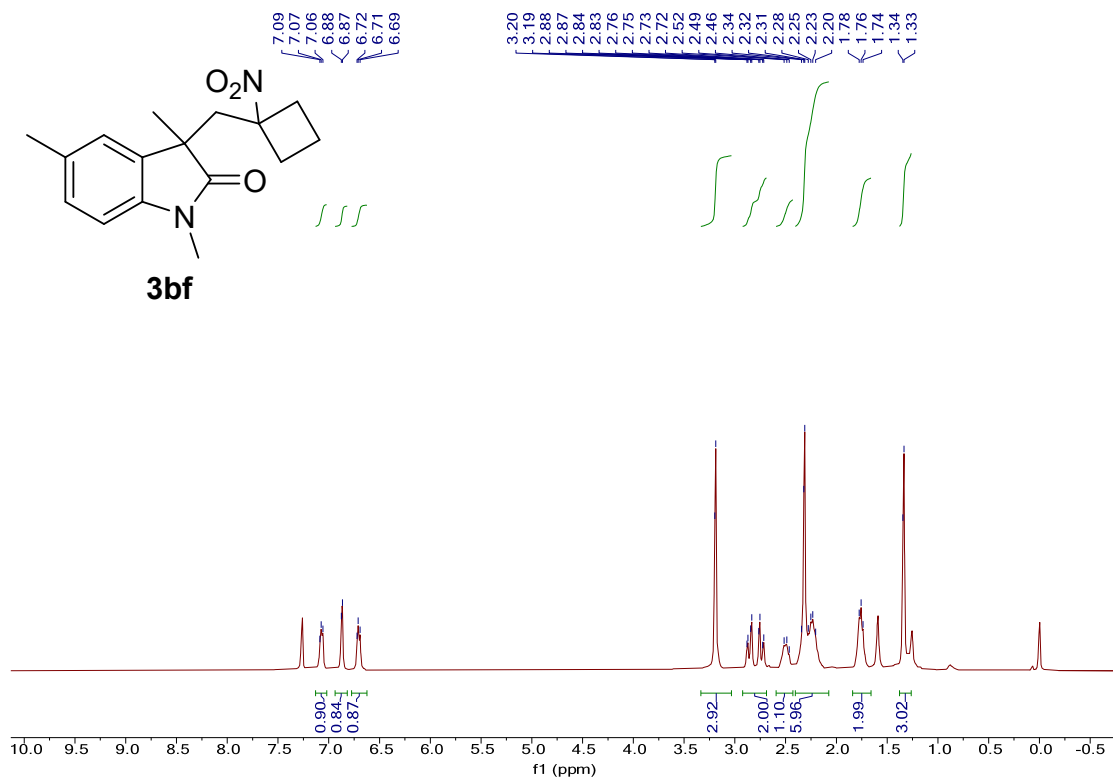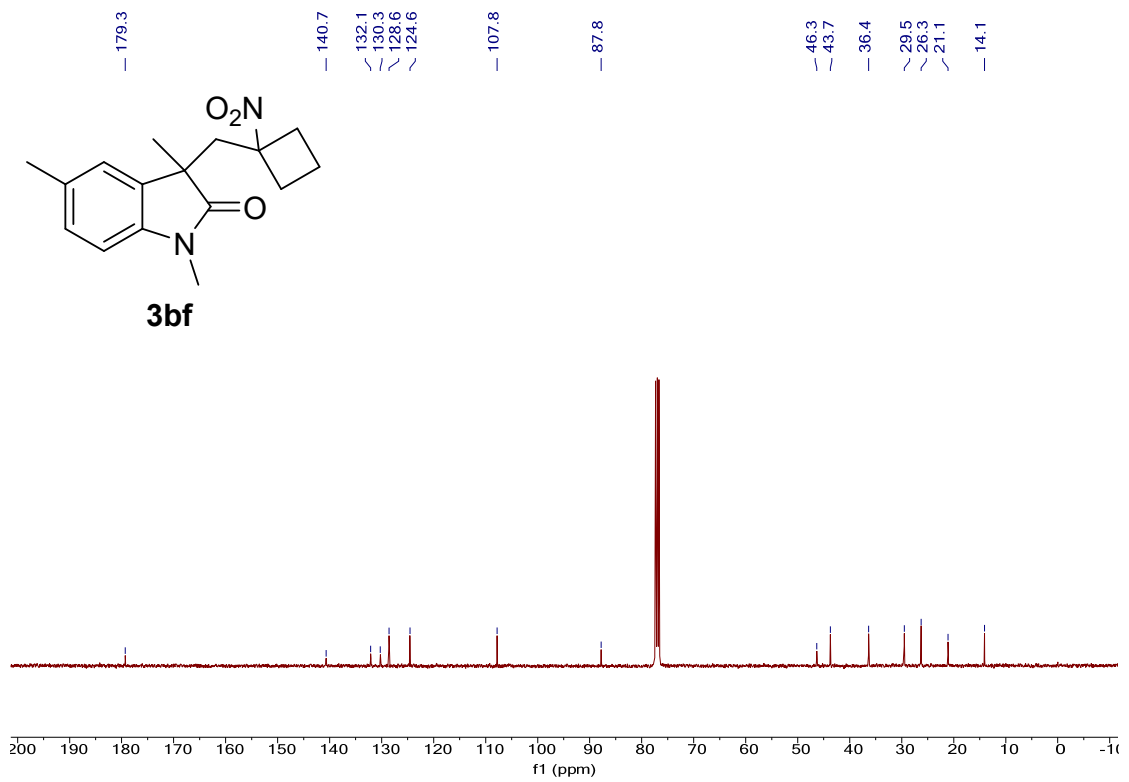

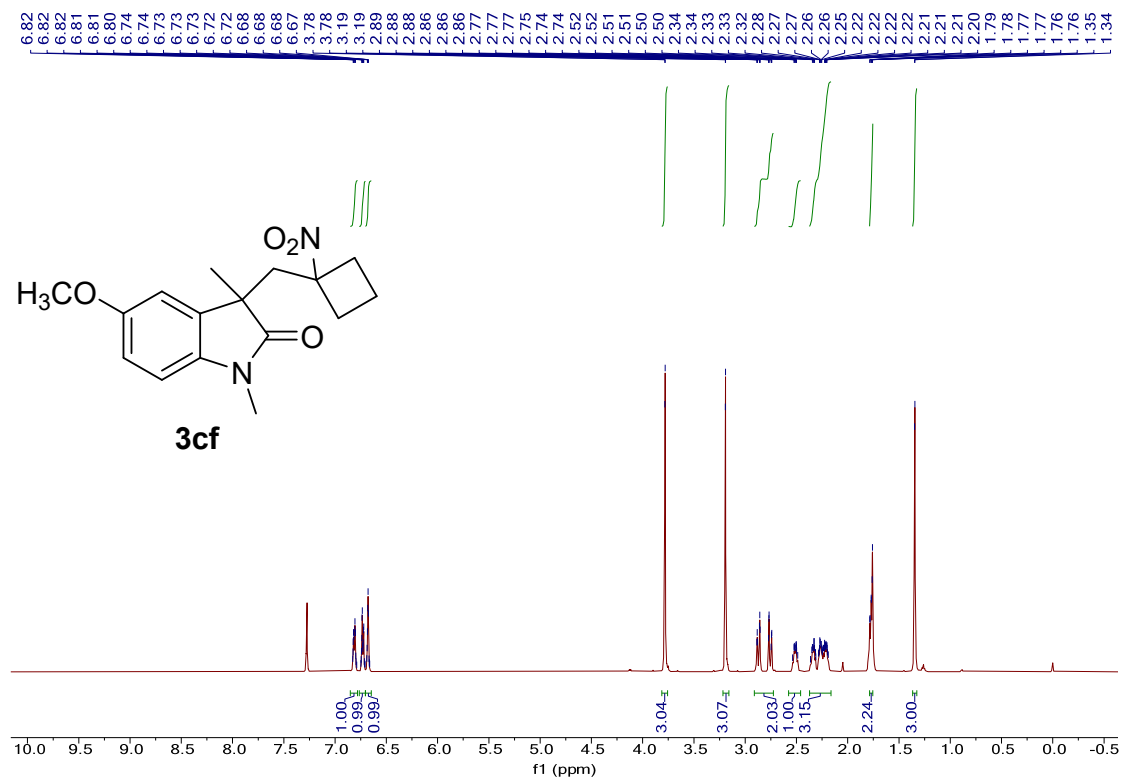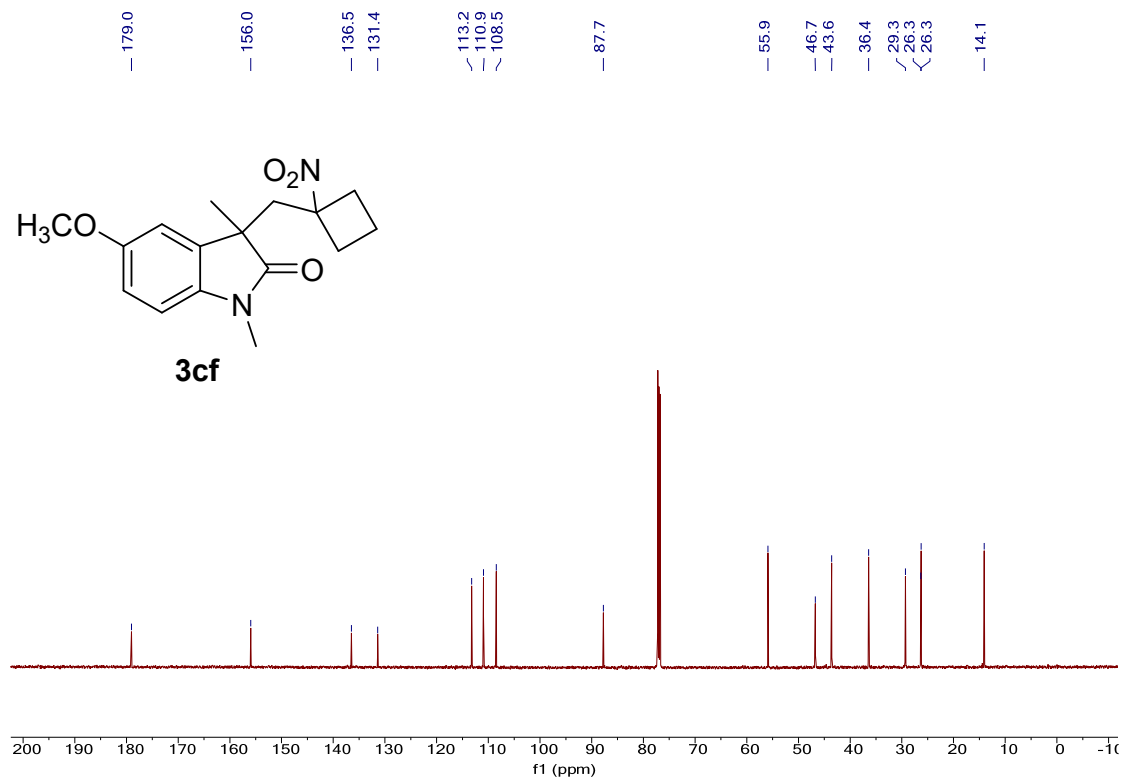

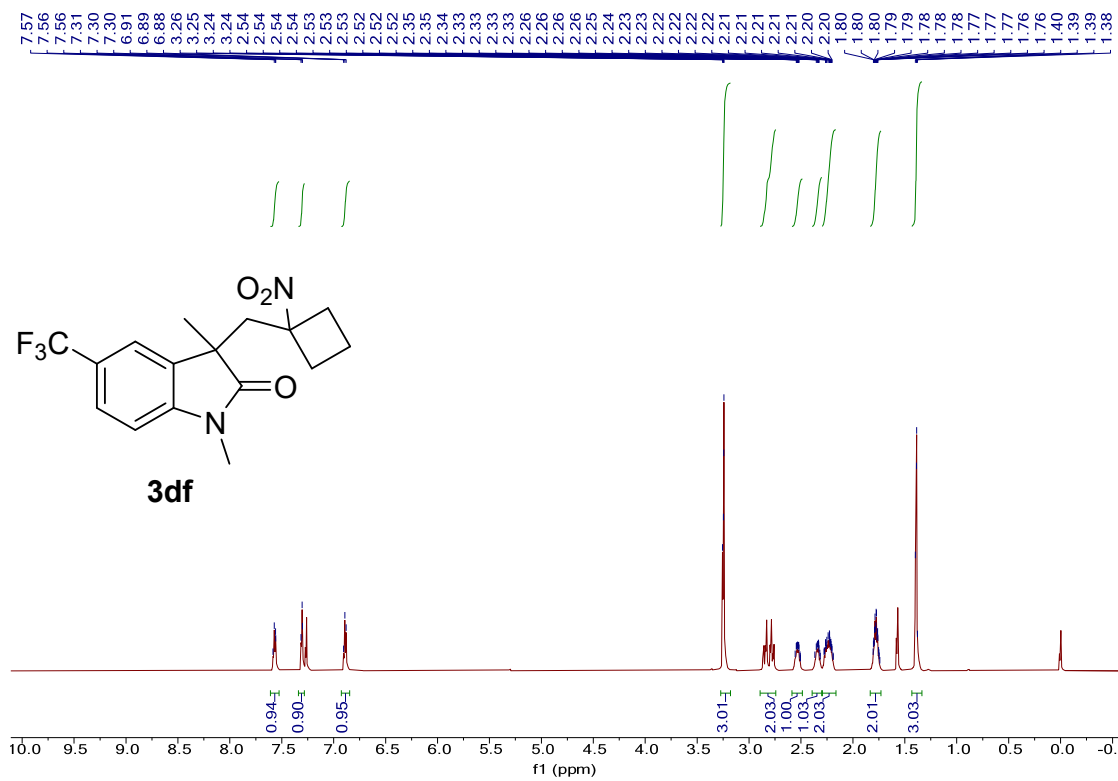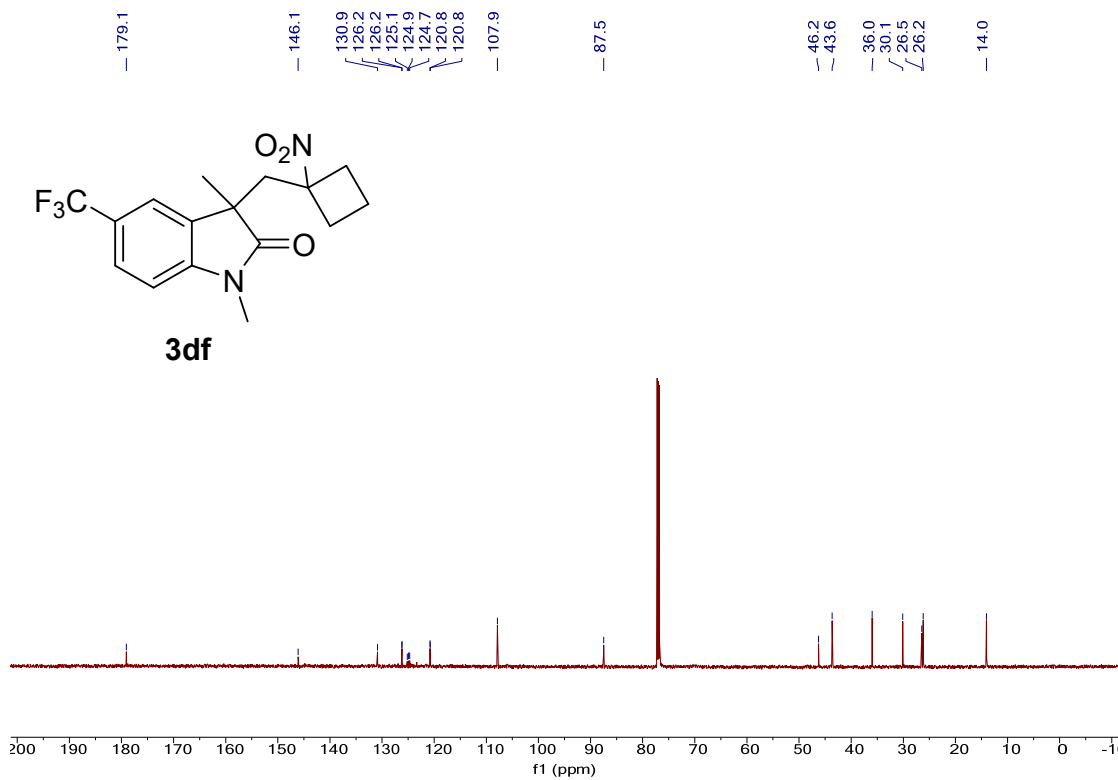

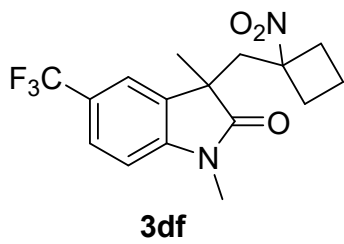

—61.53

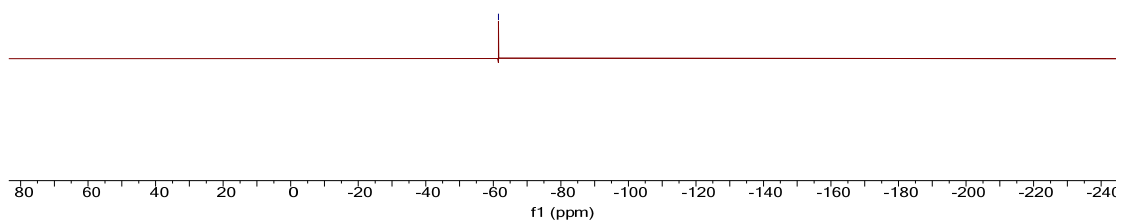



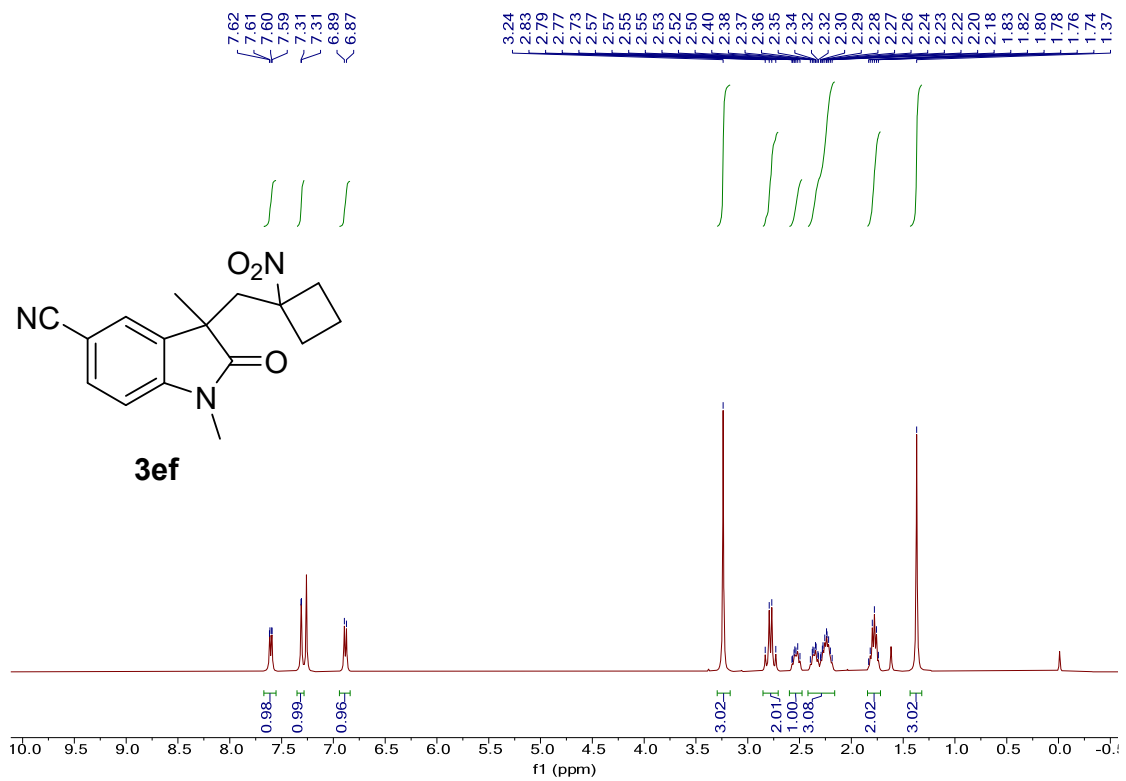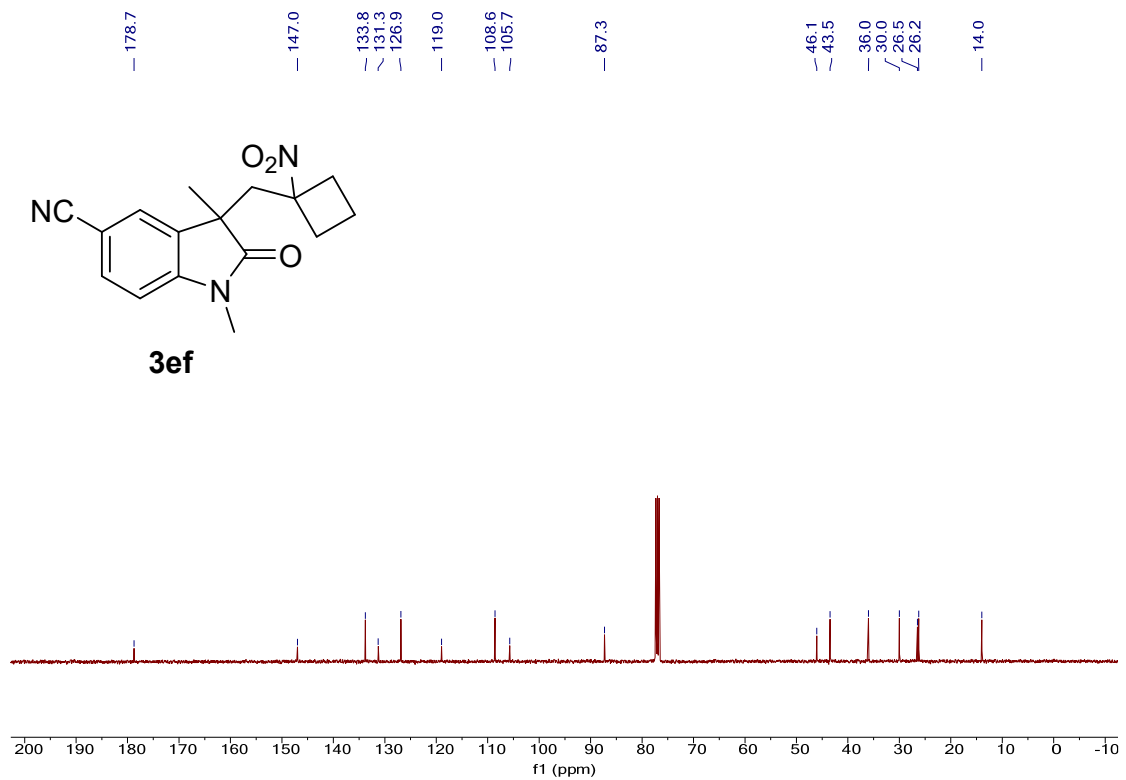

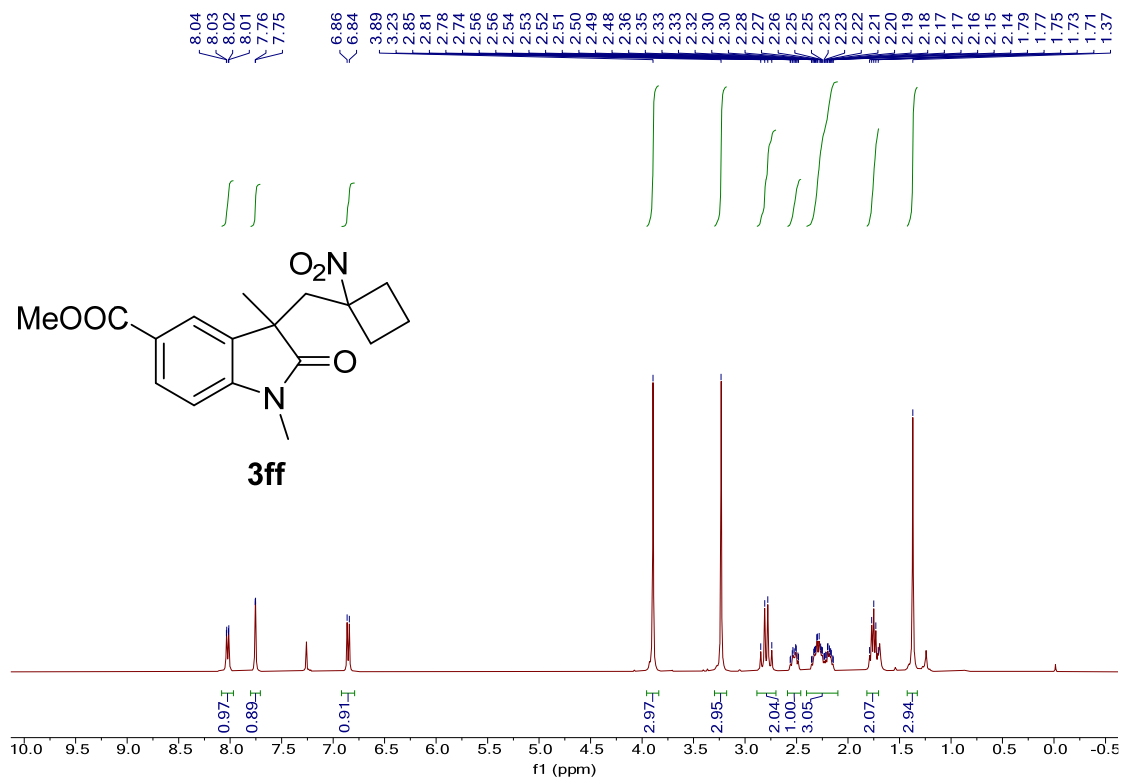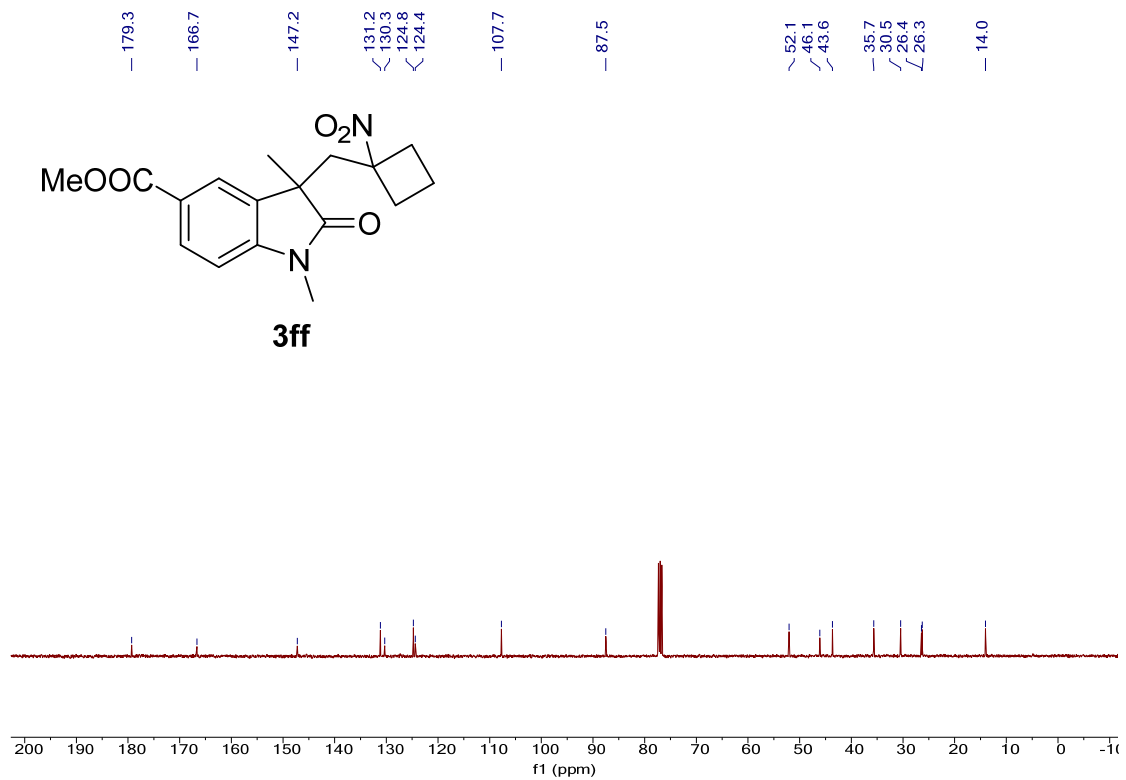

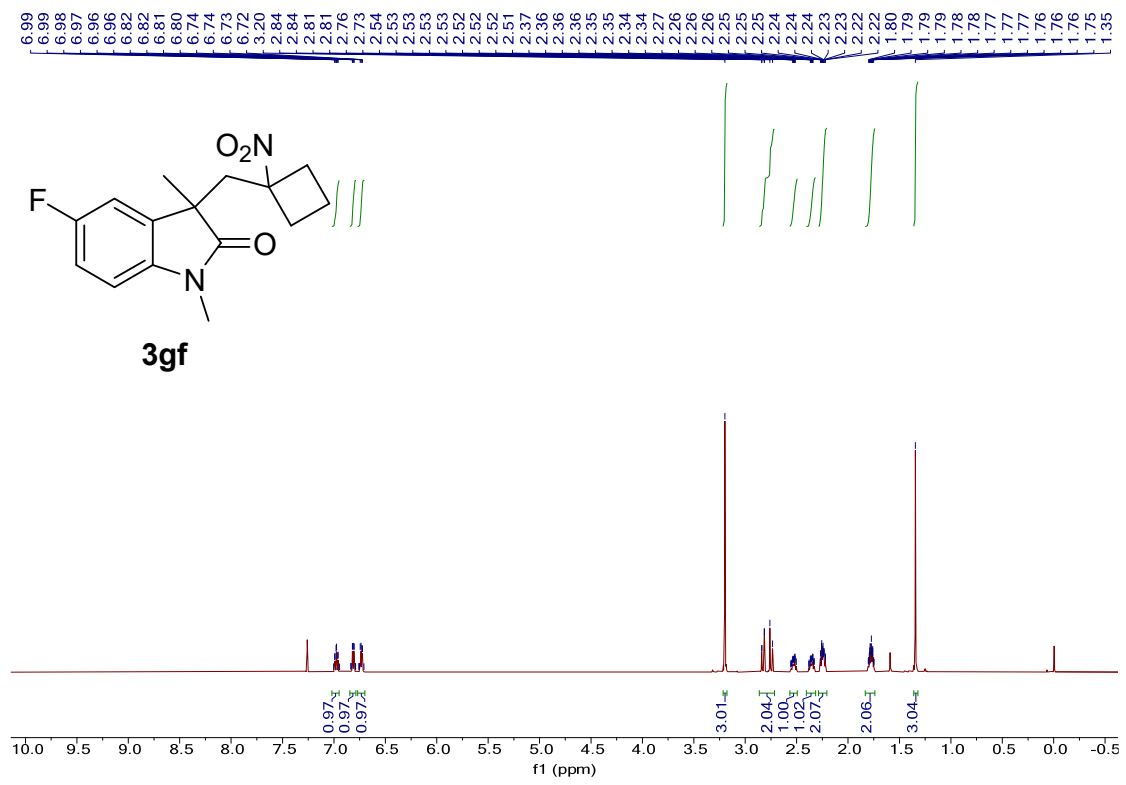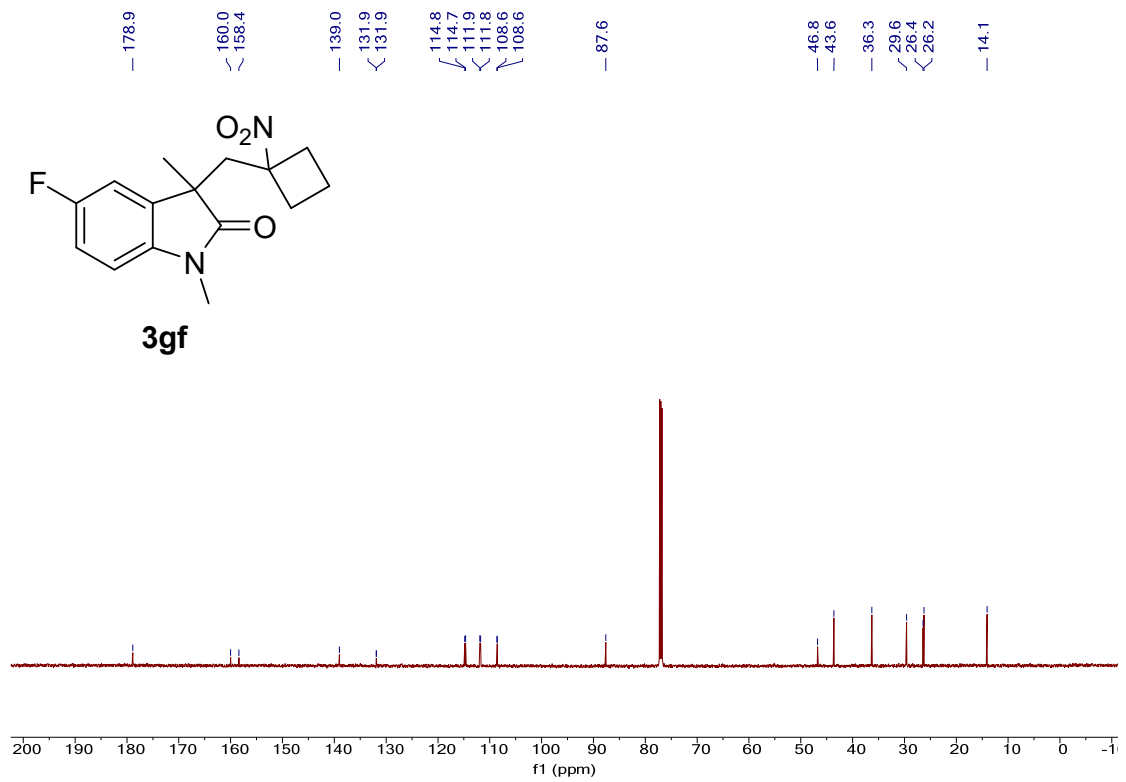

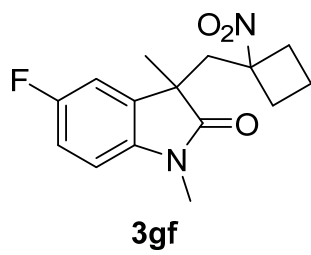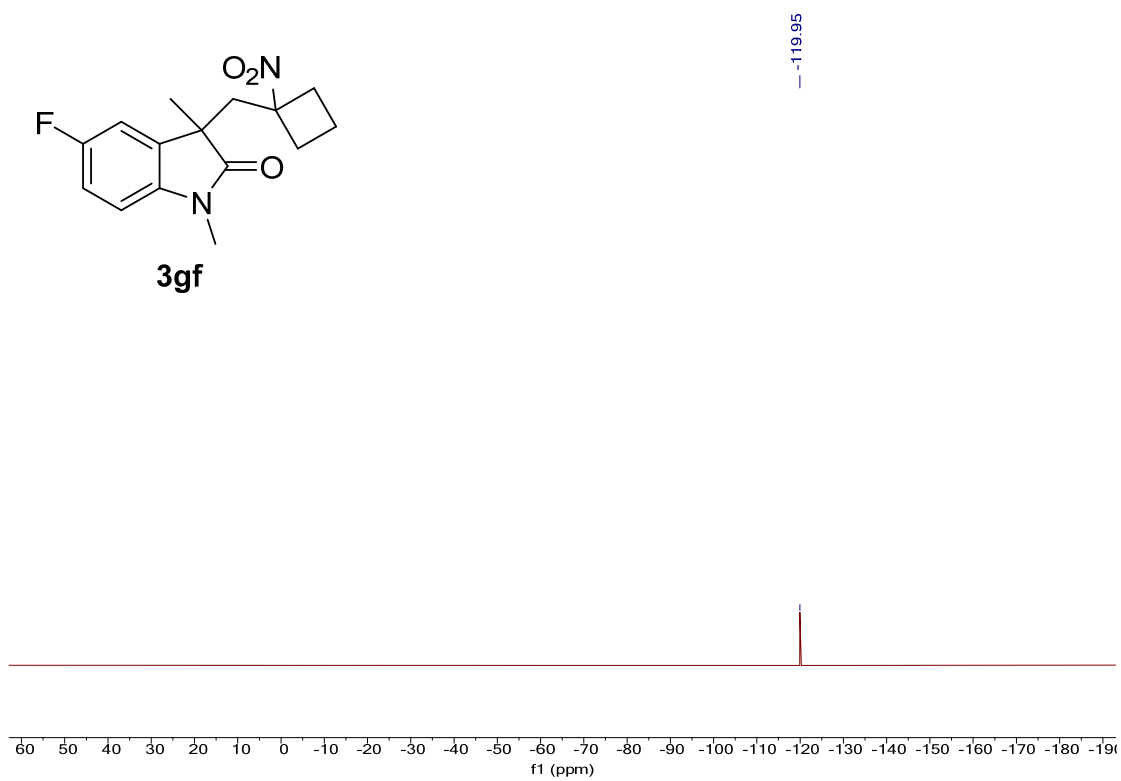

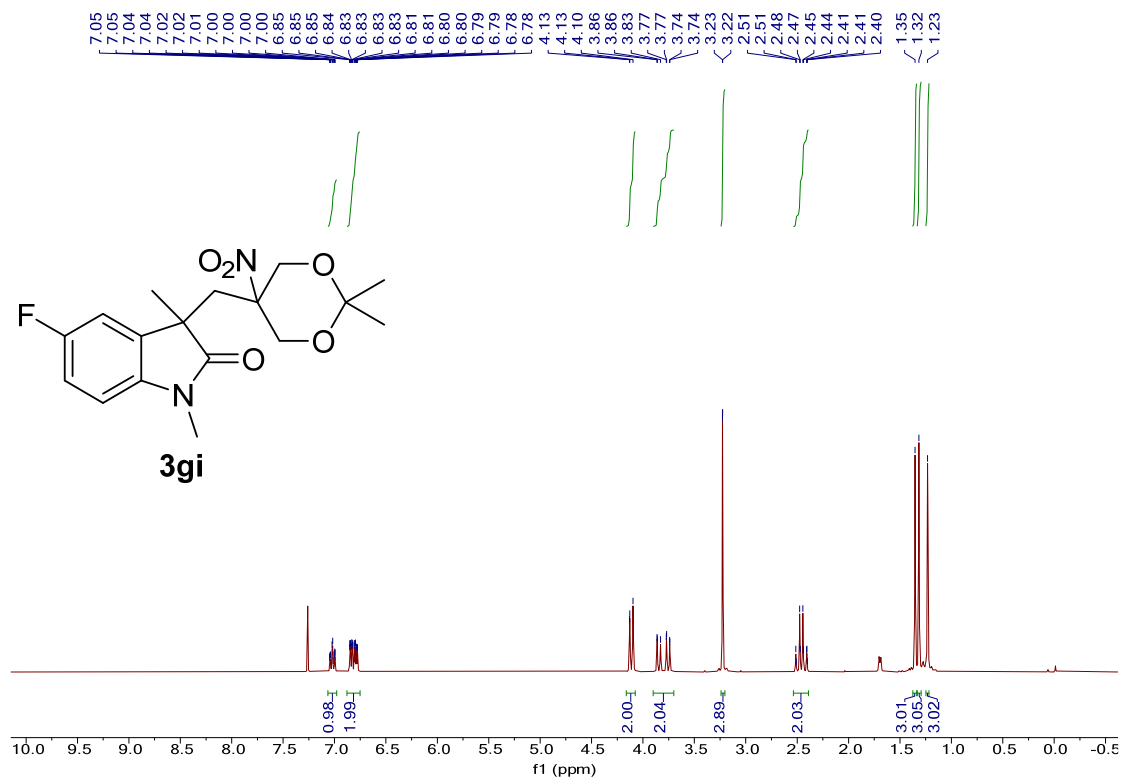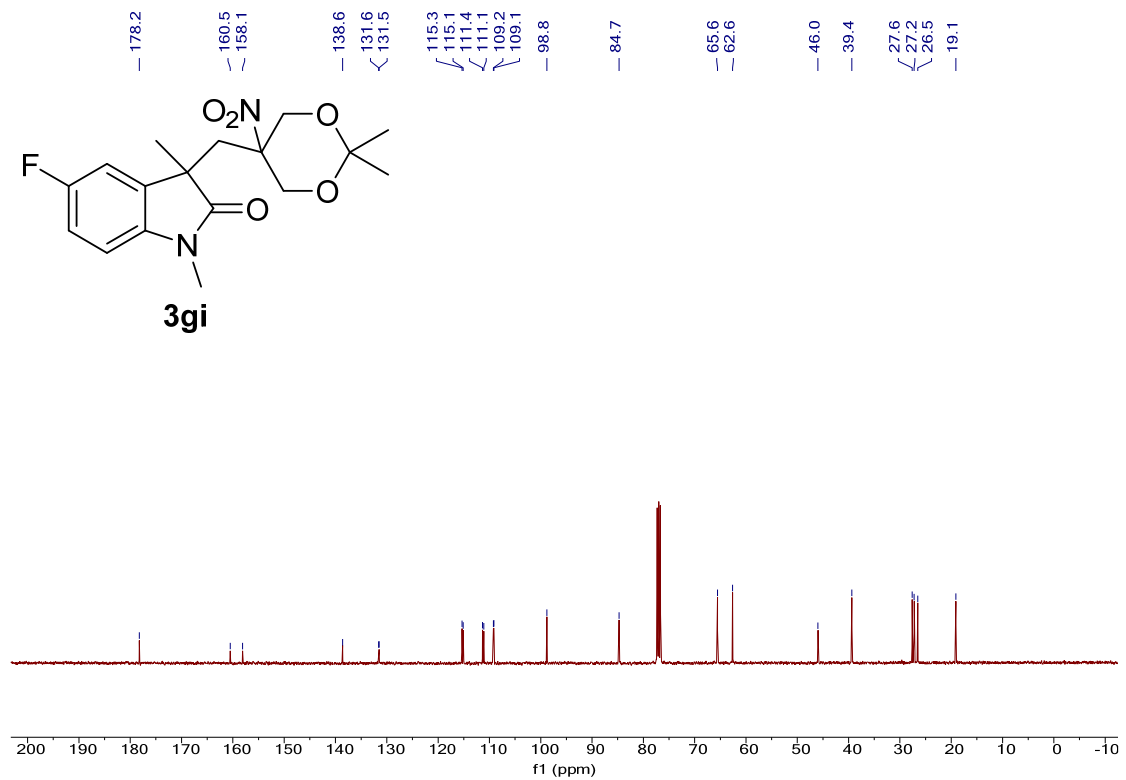

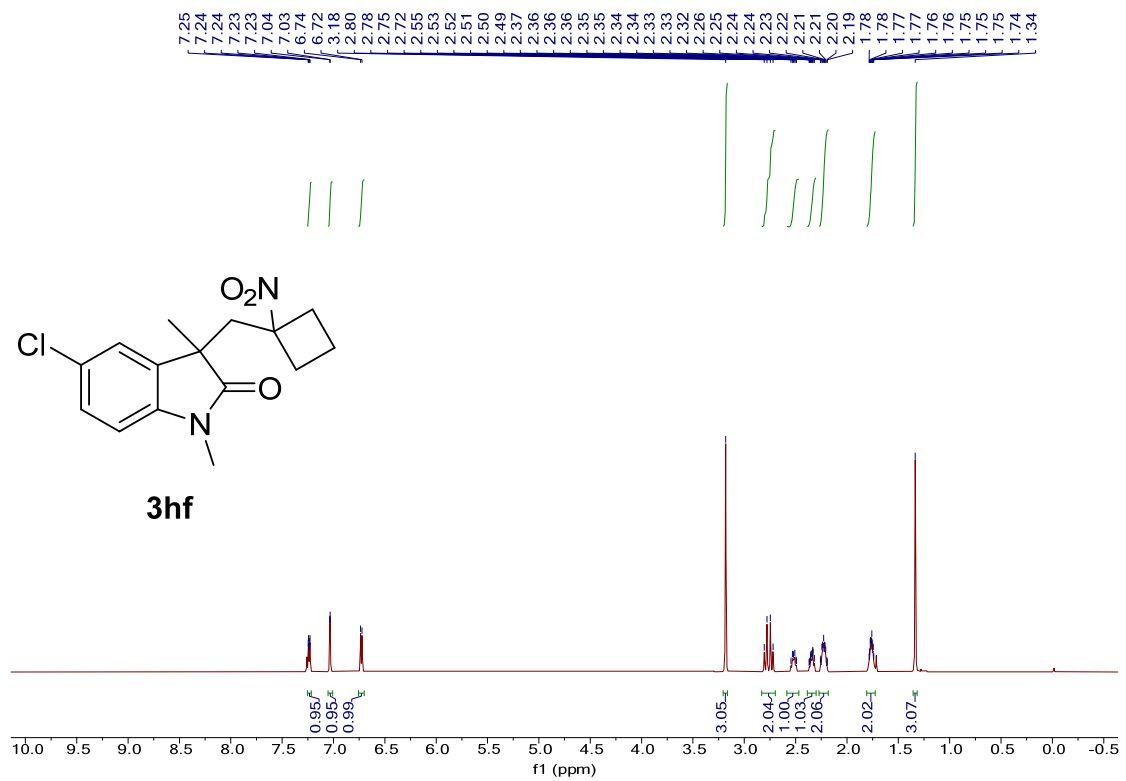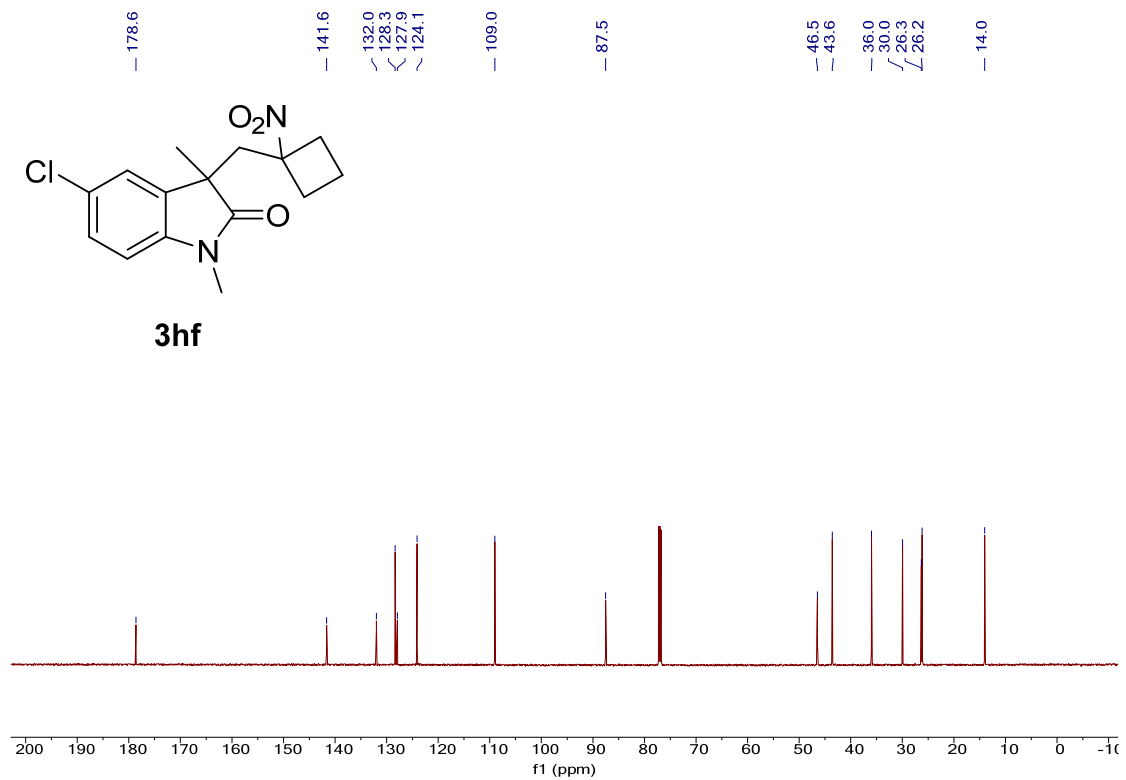

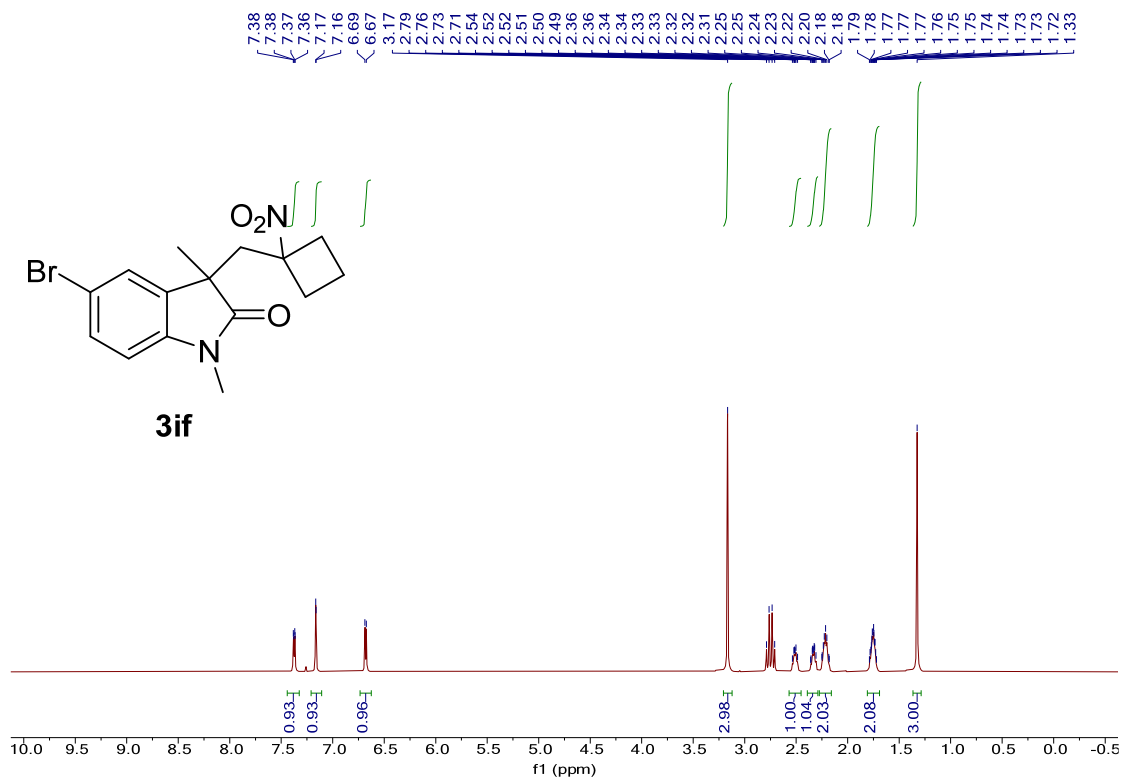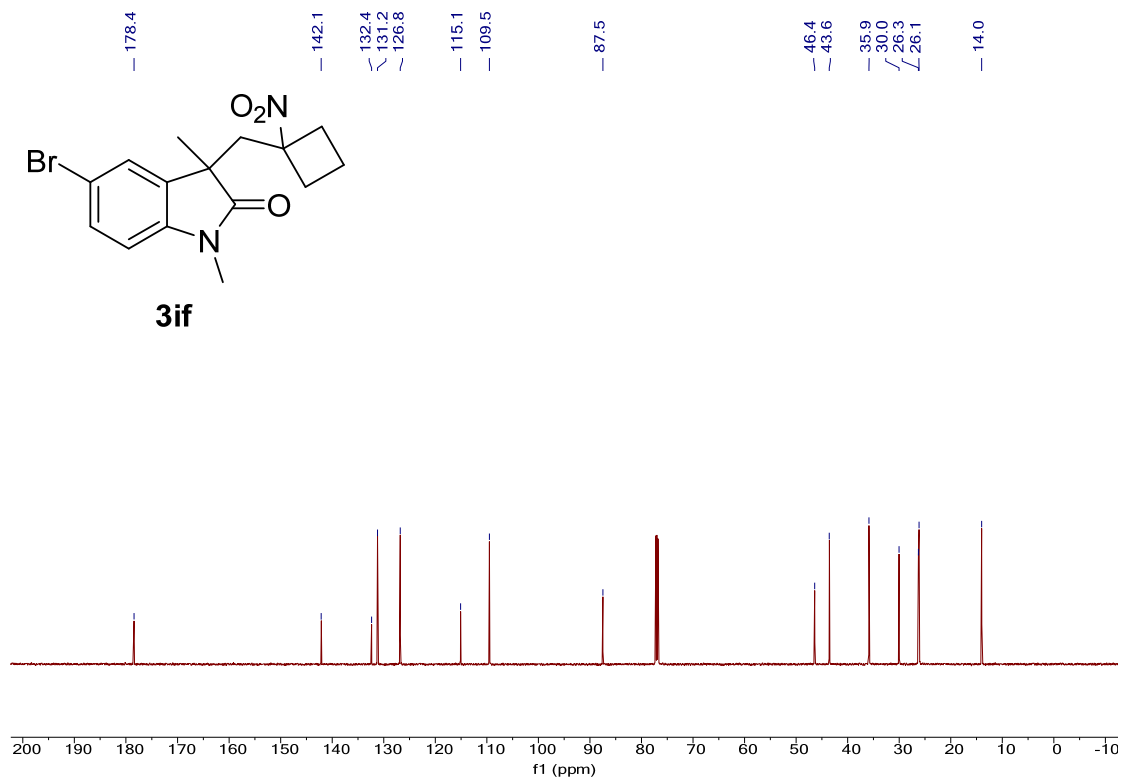

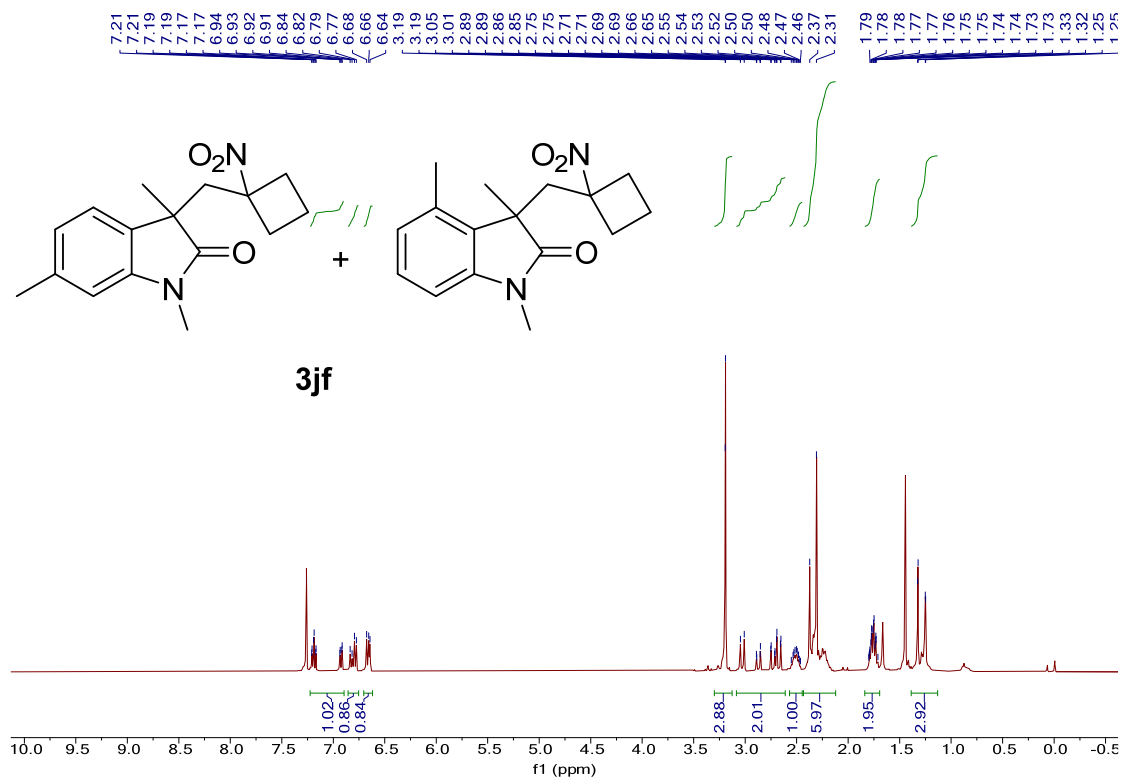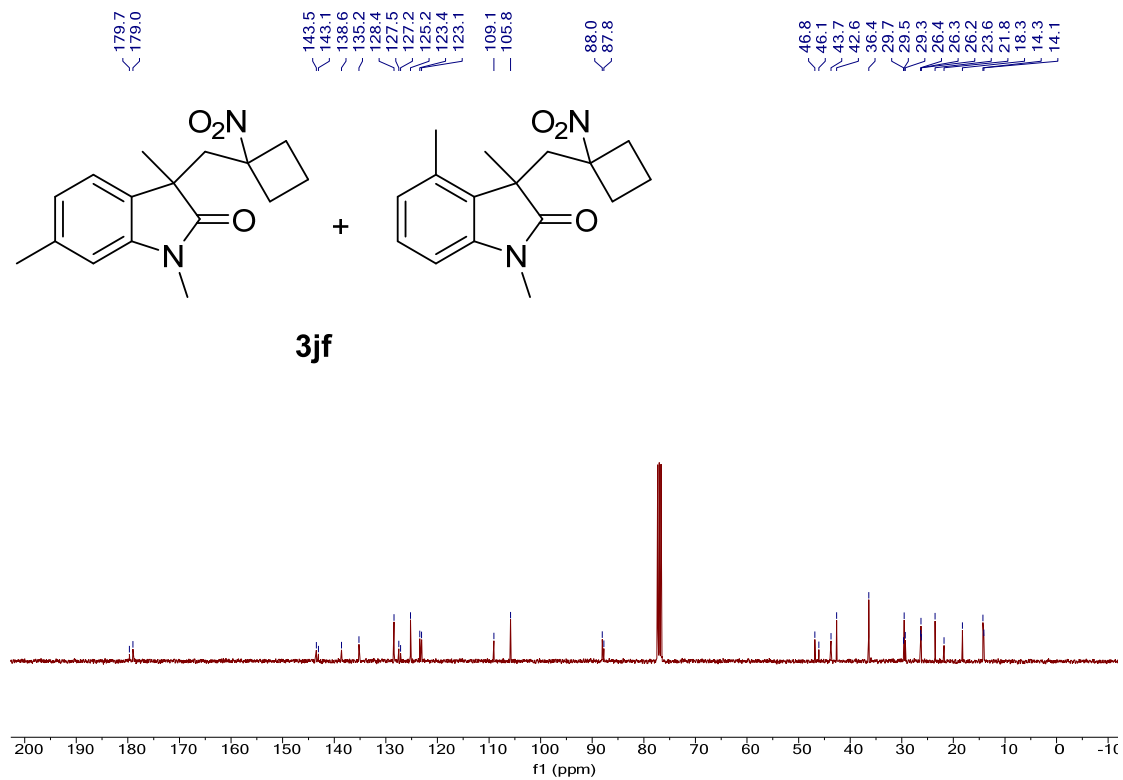



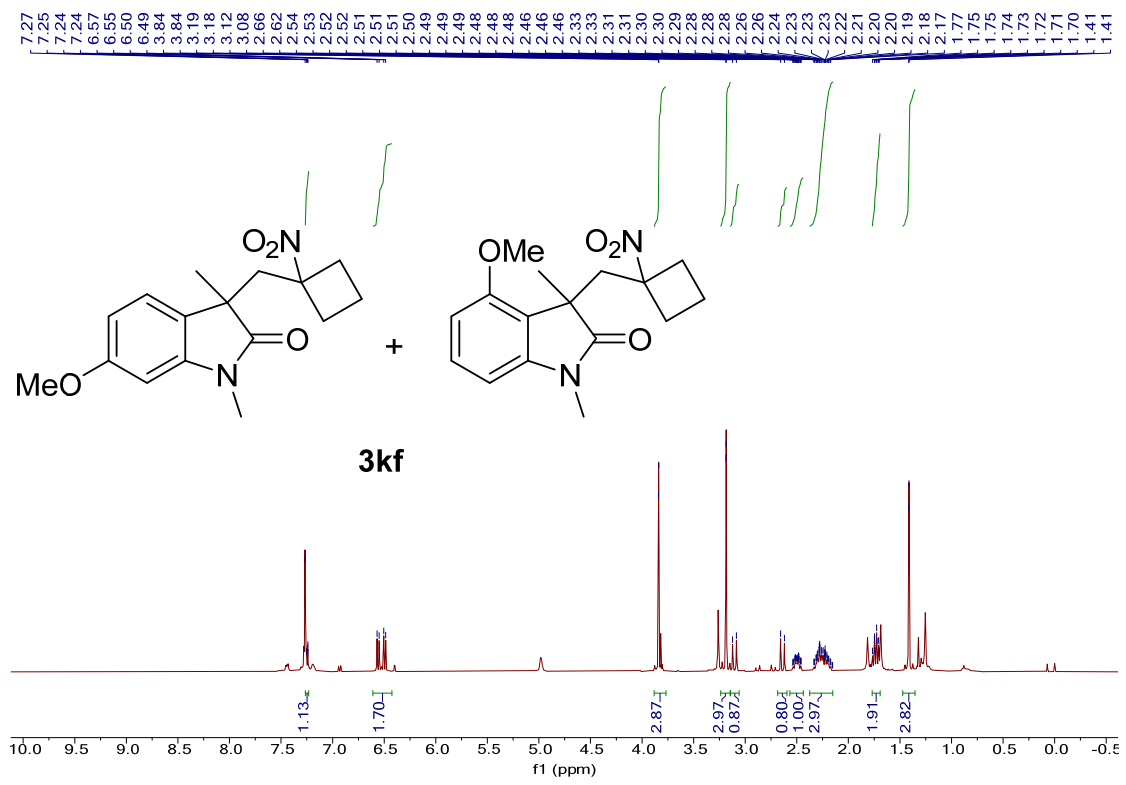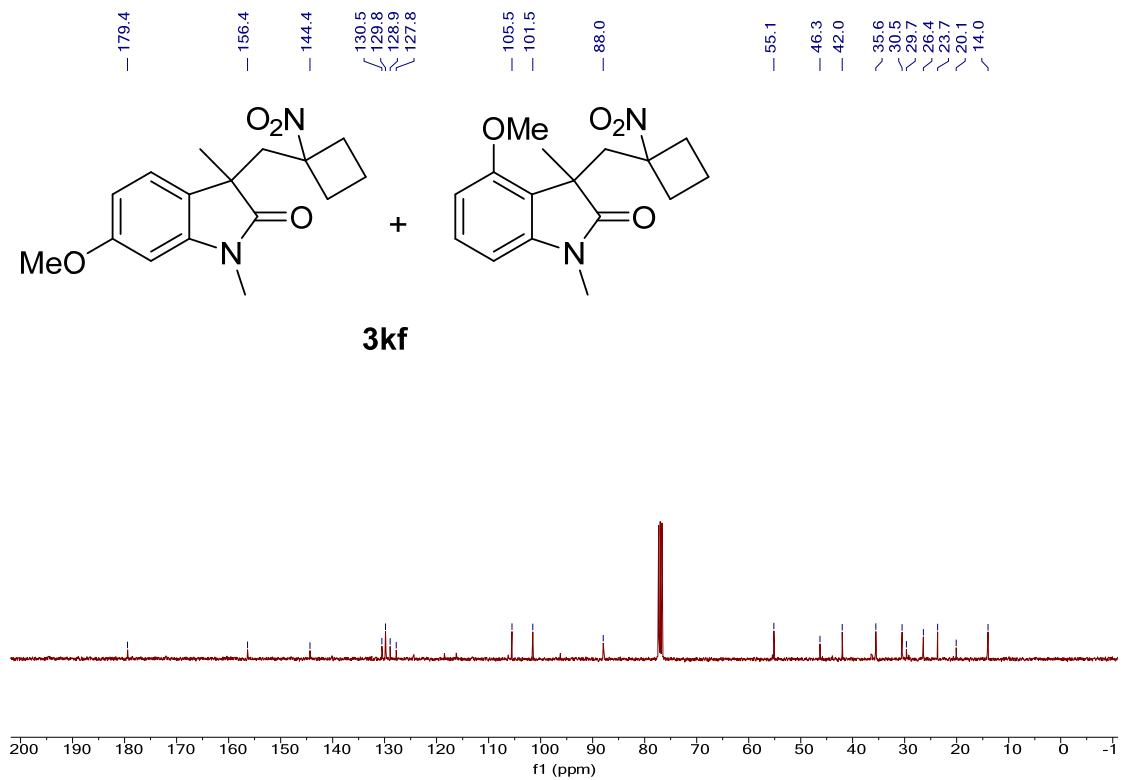

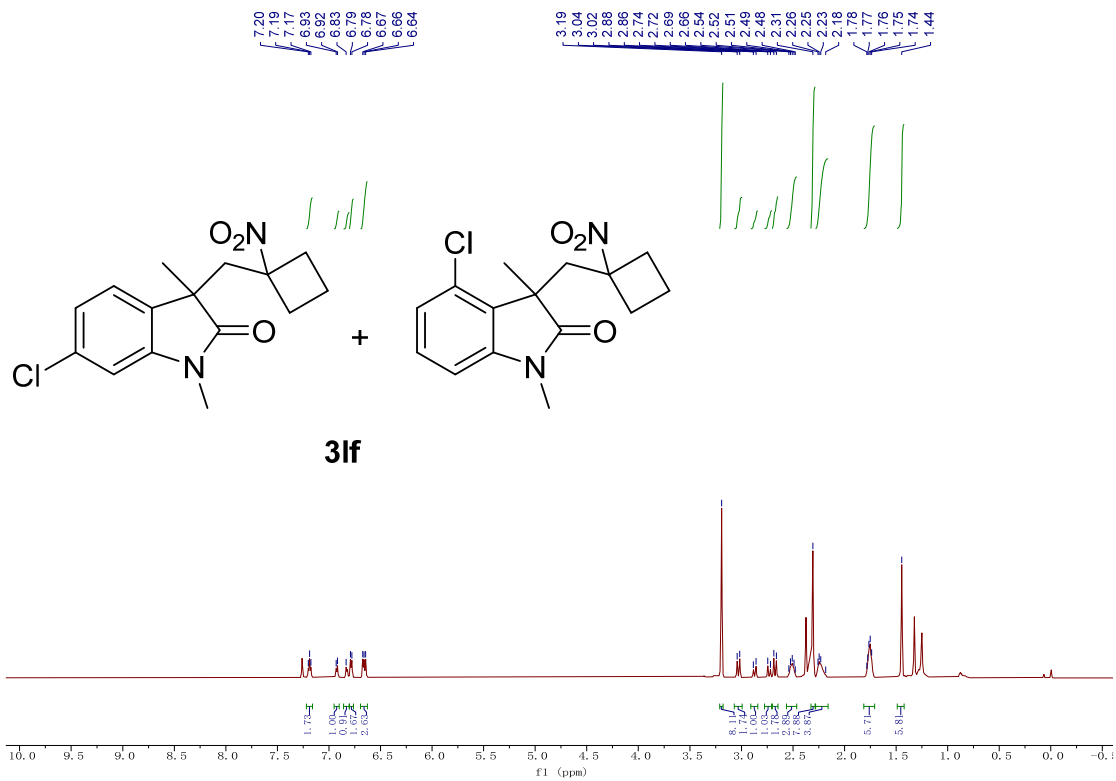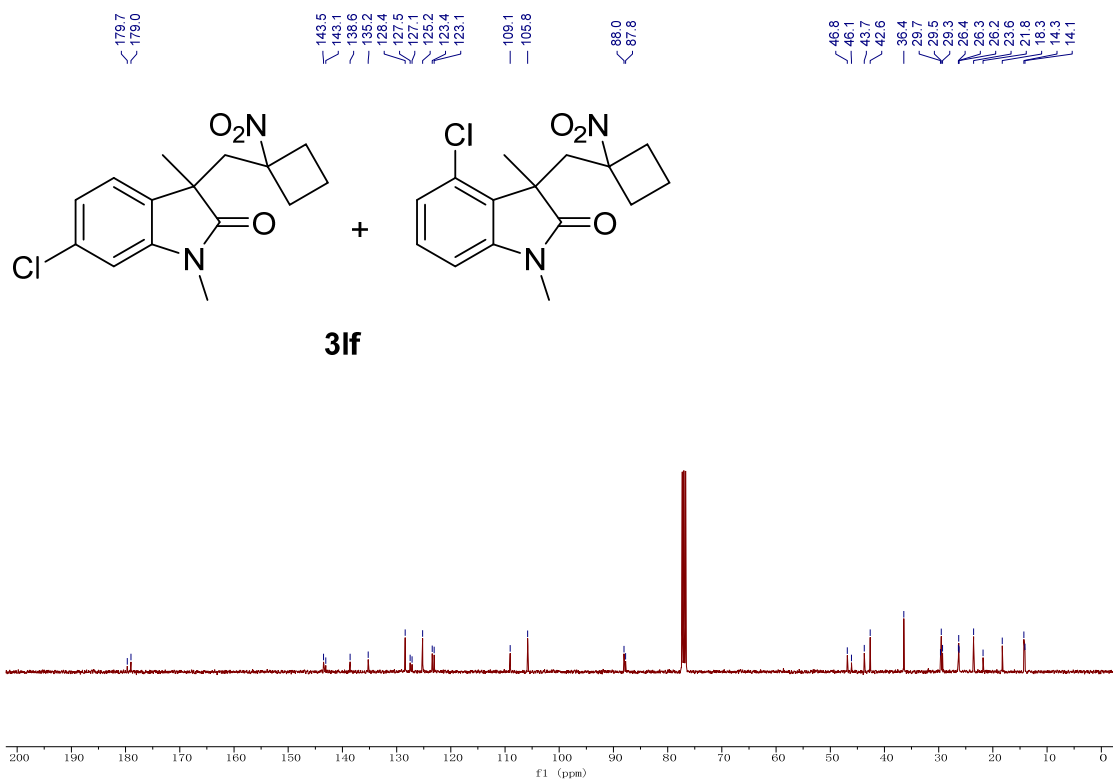

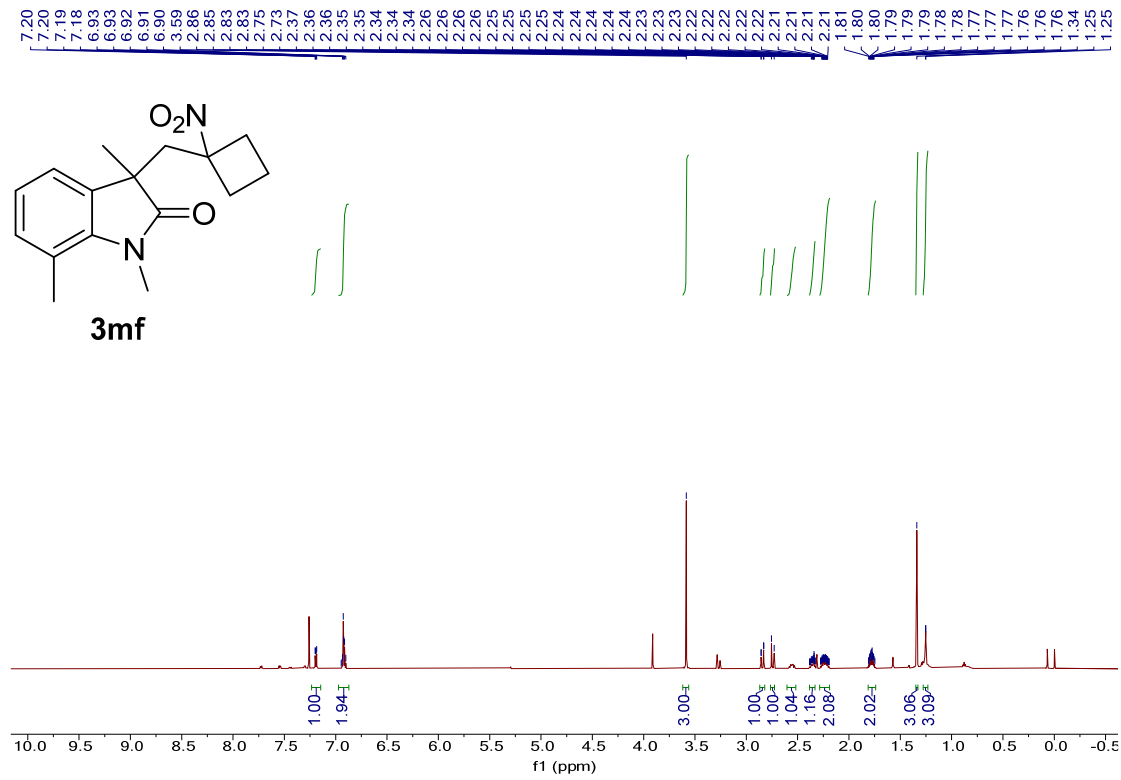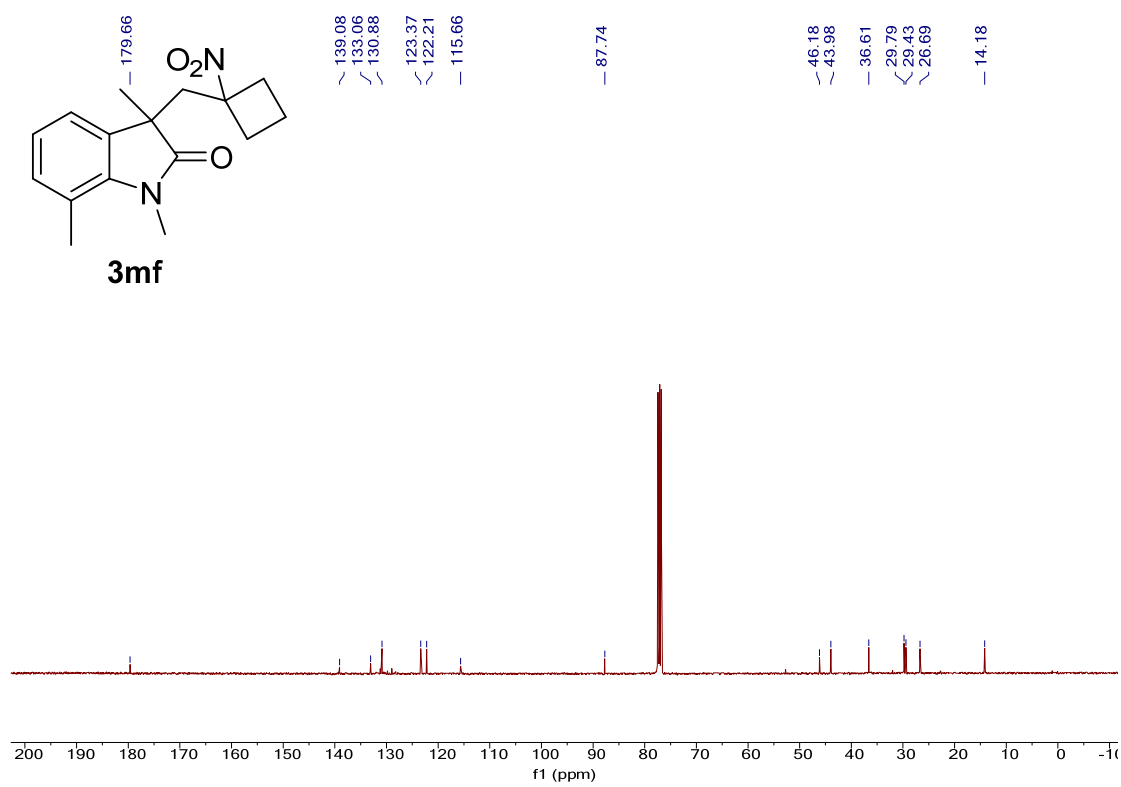

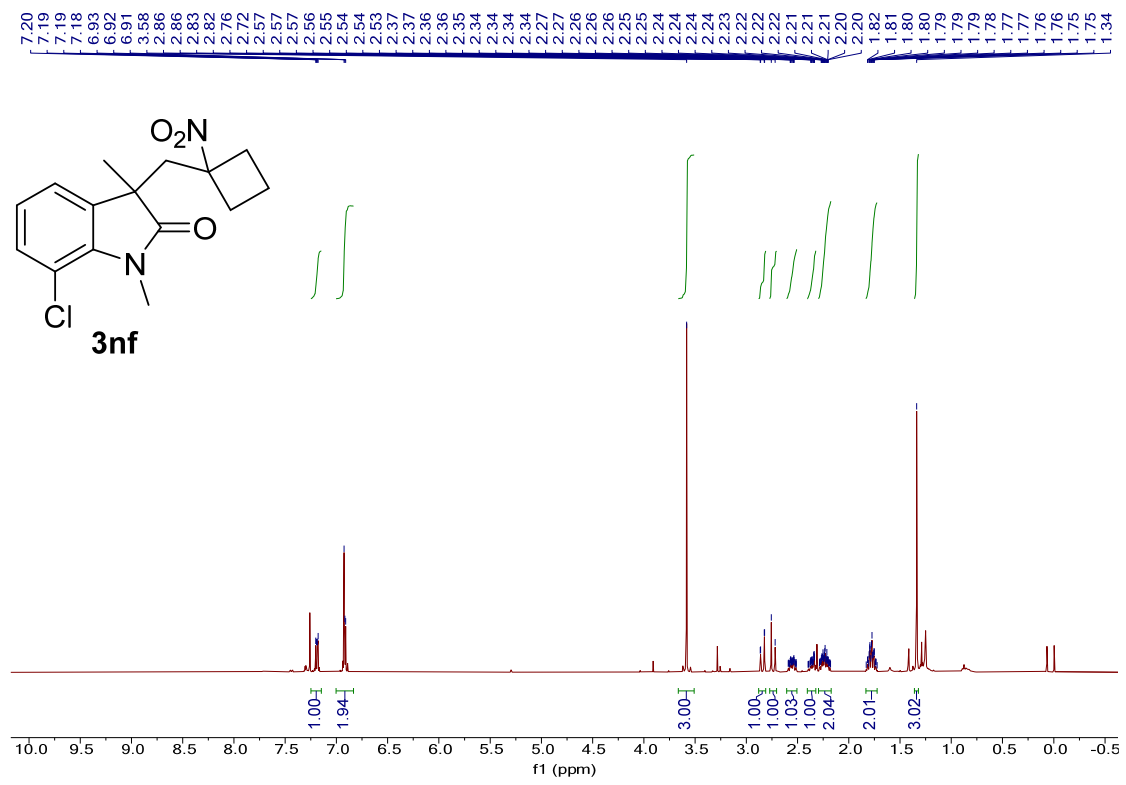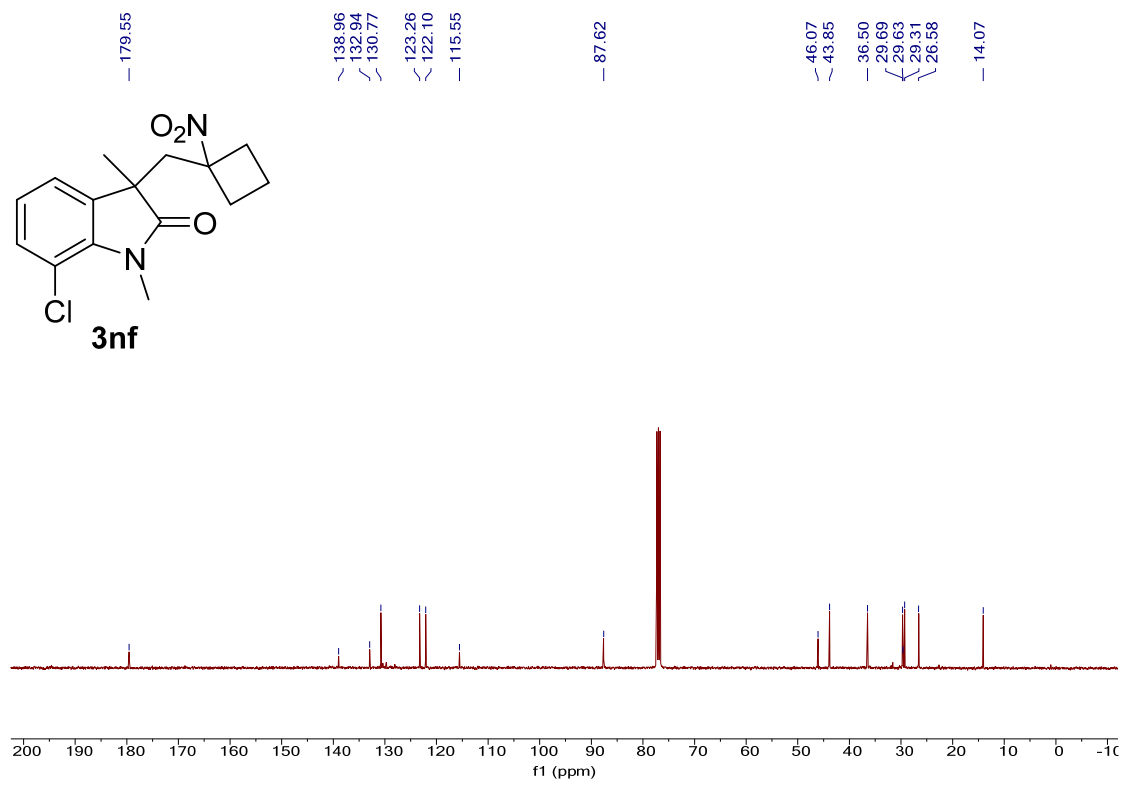

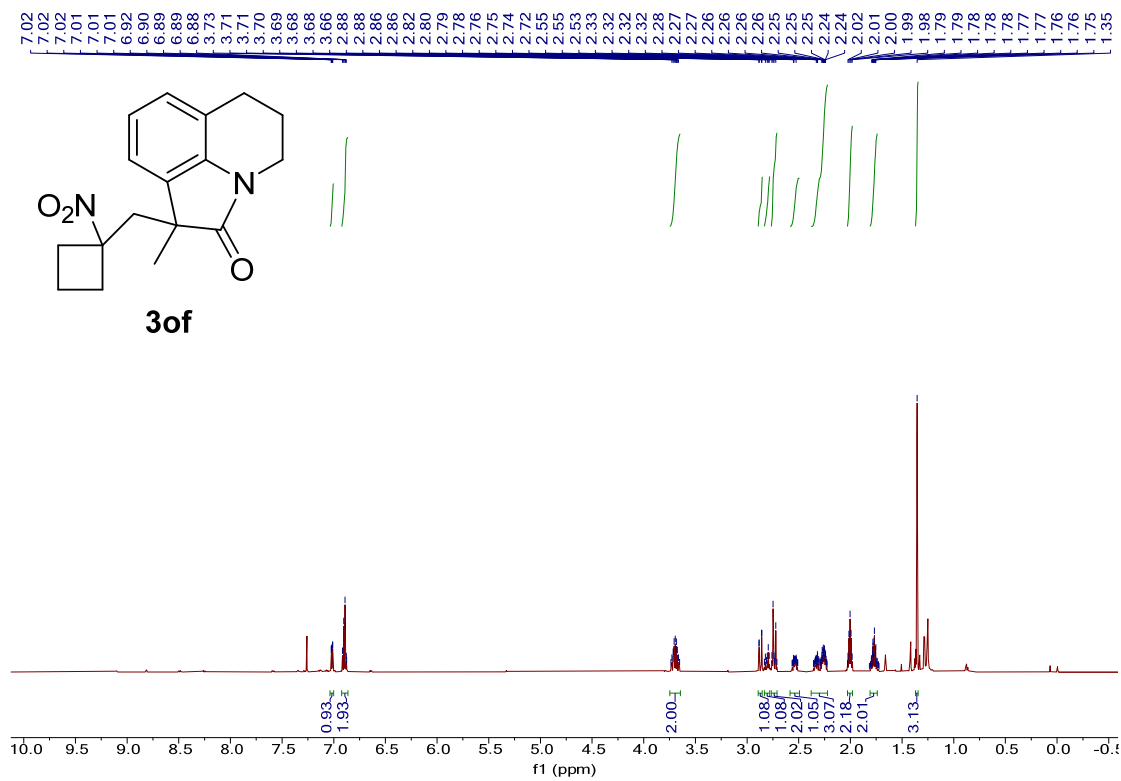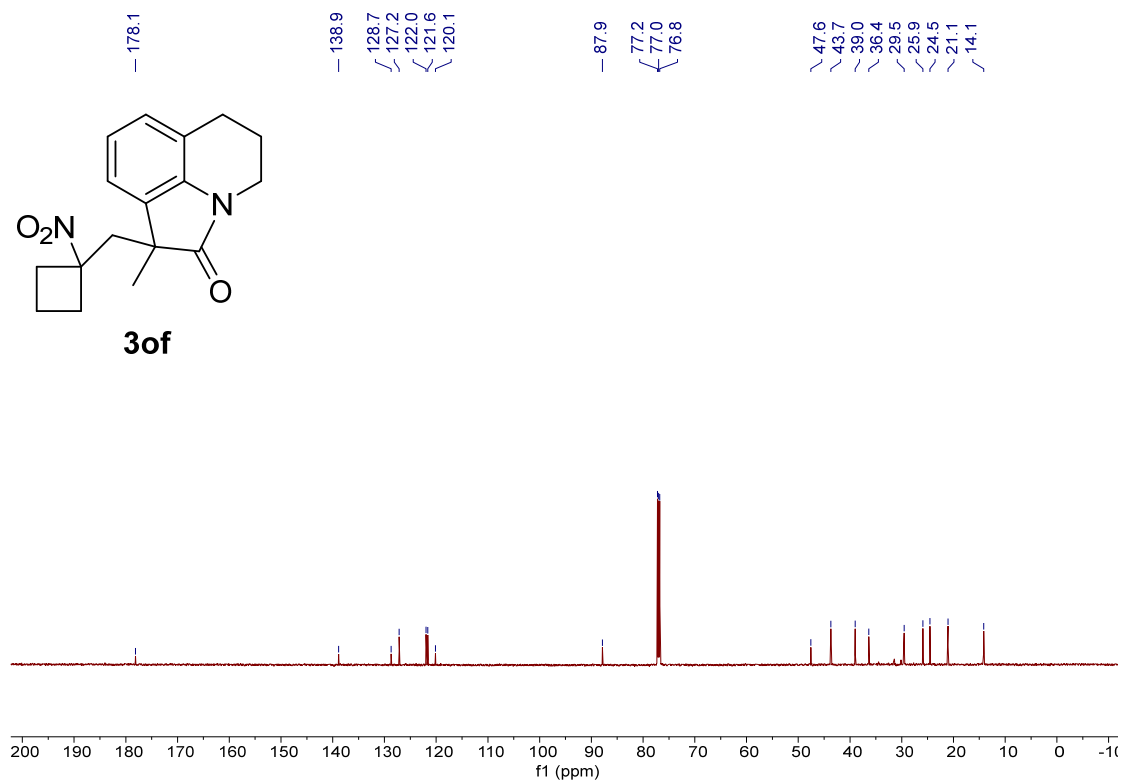

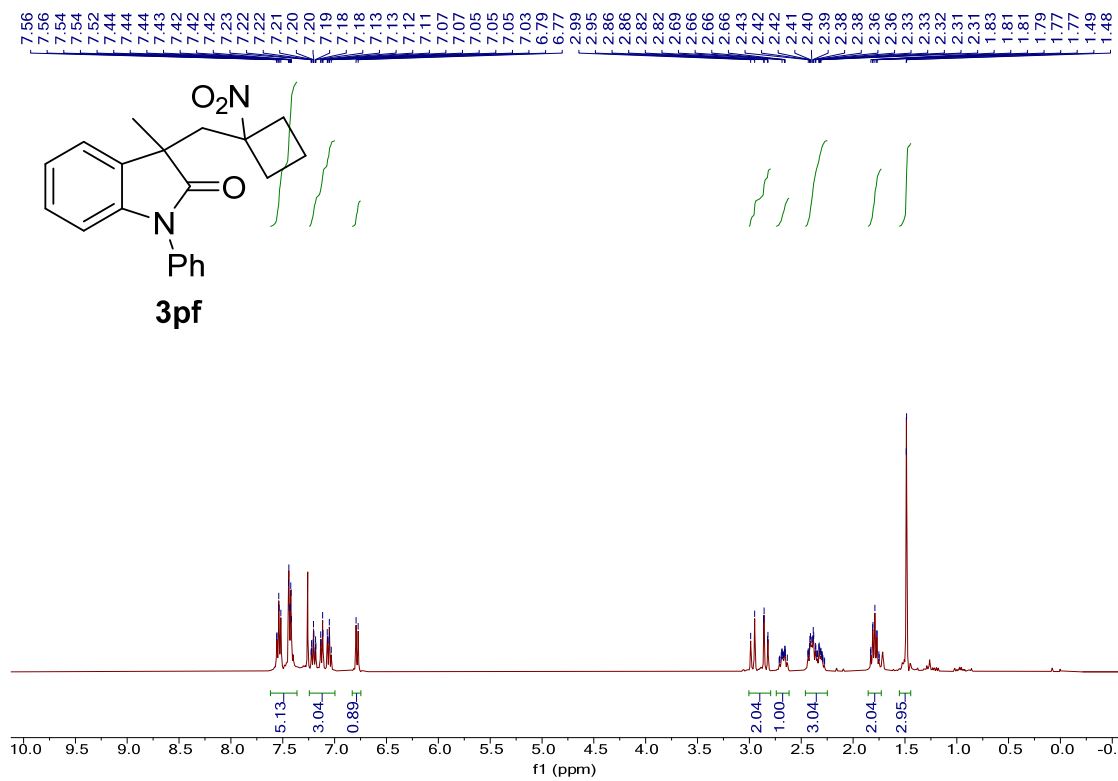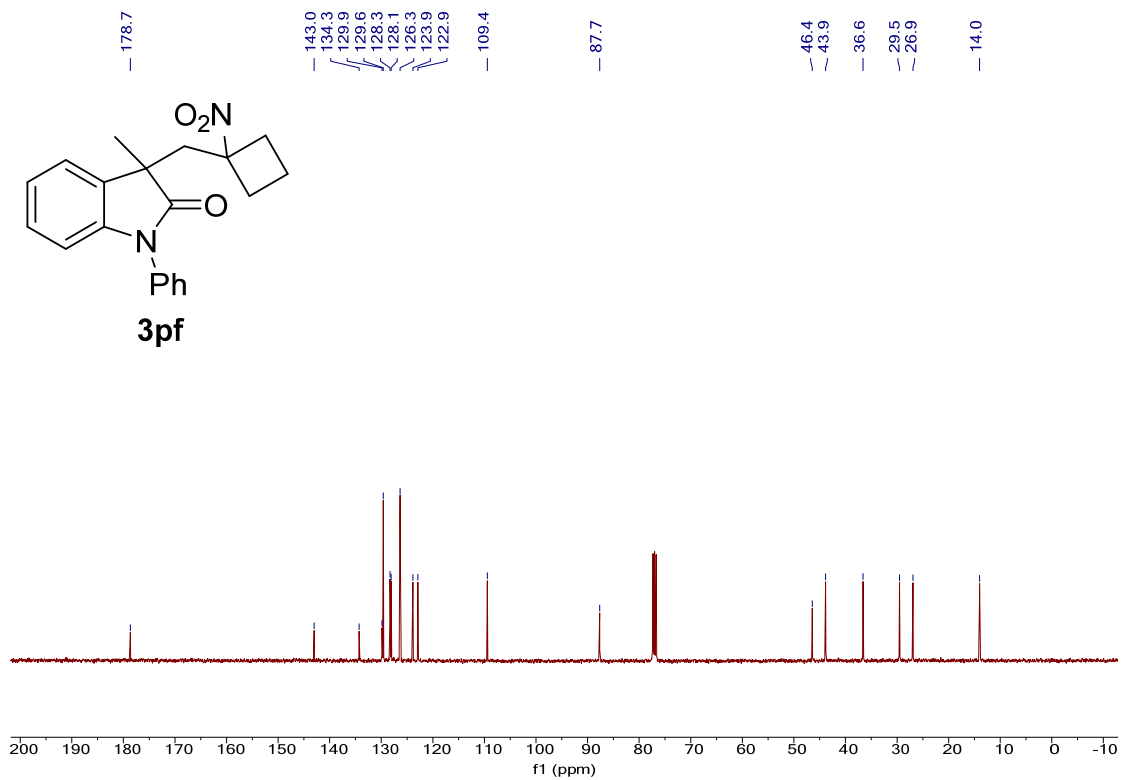

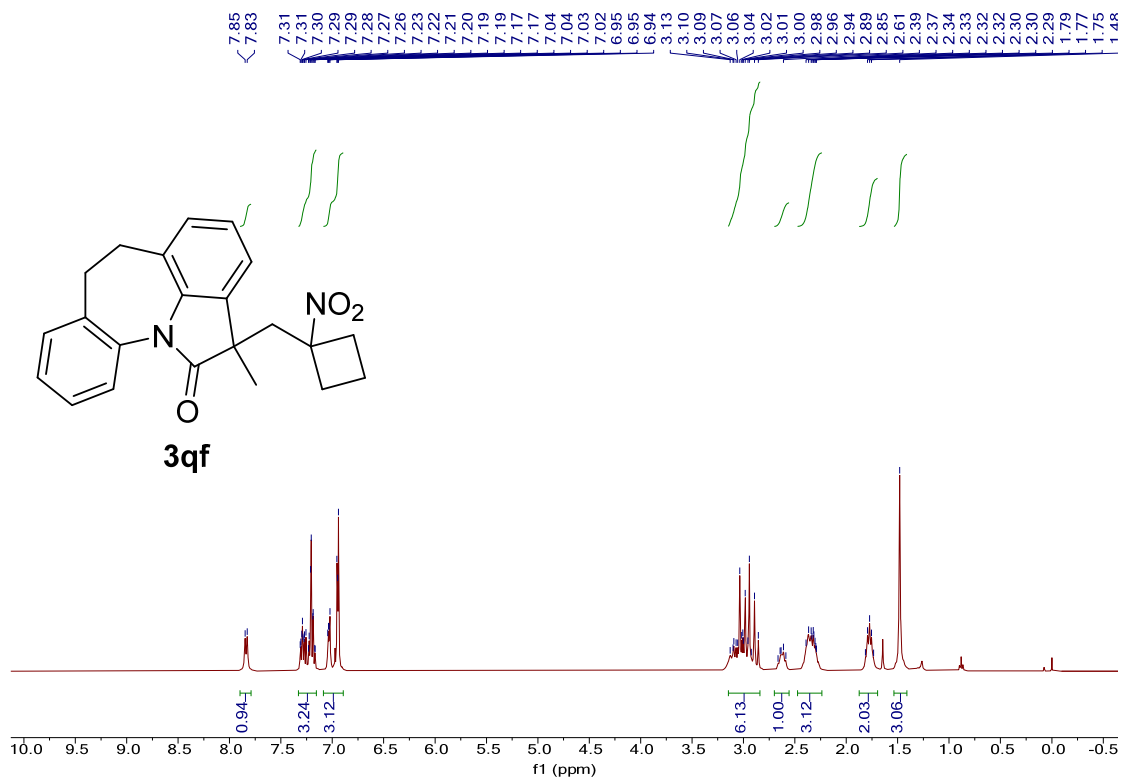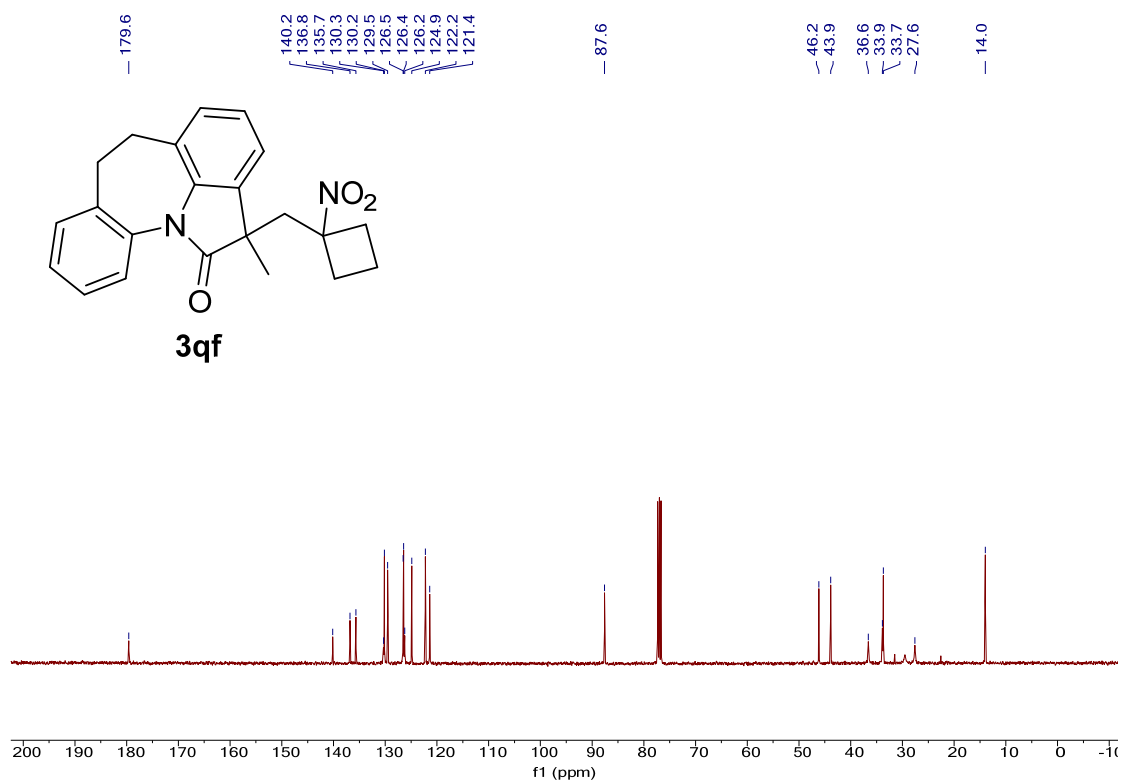

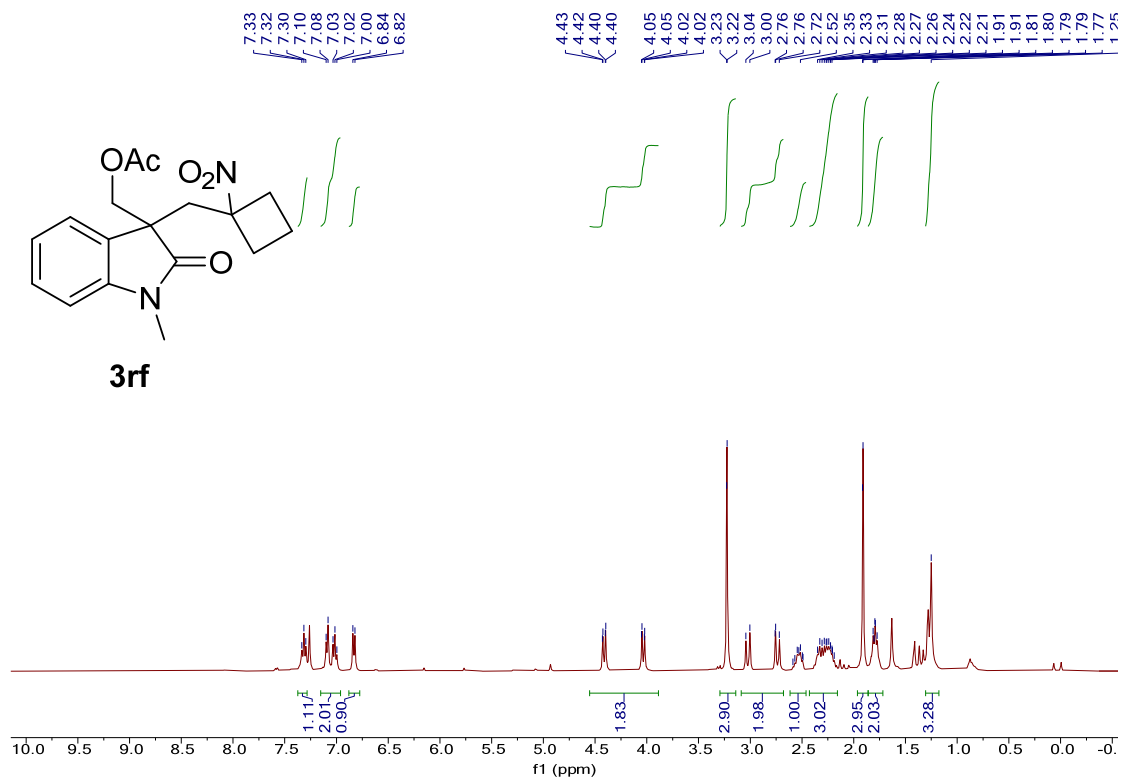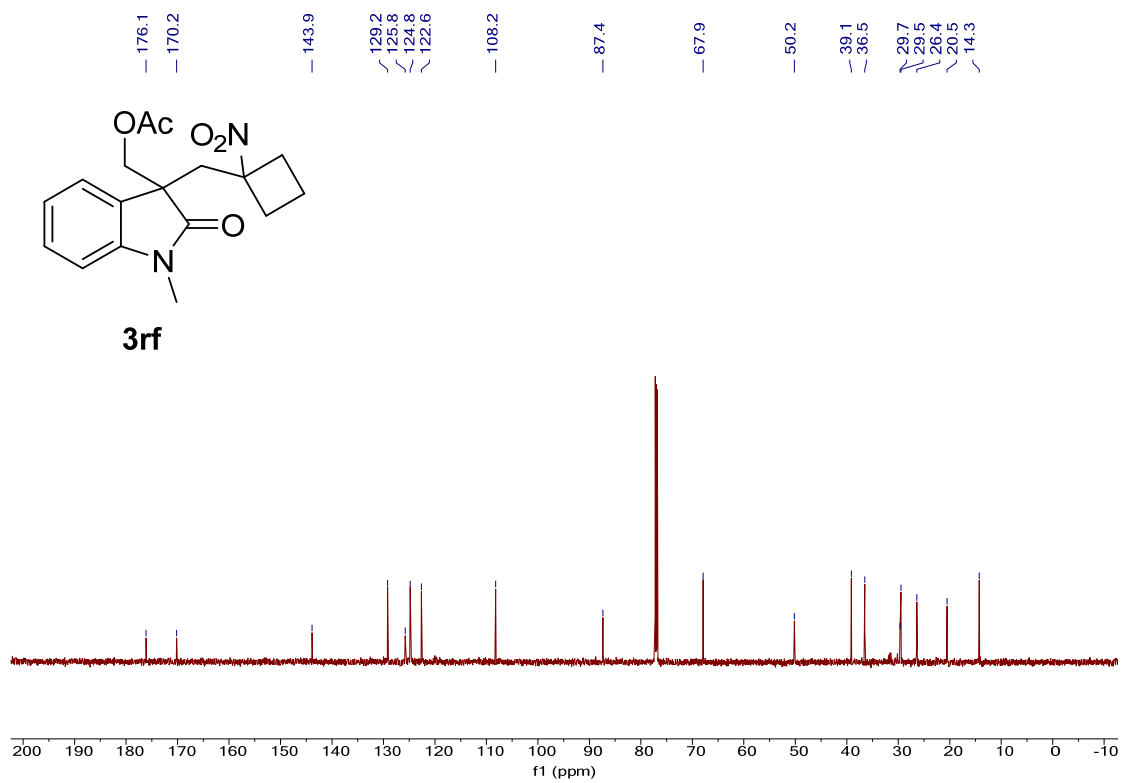



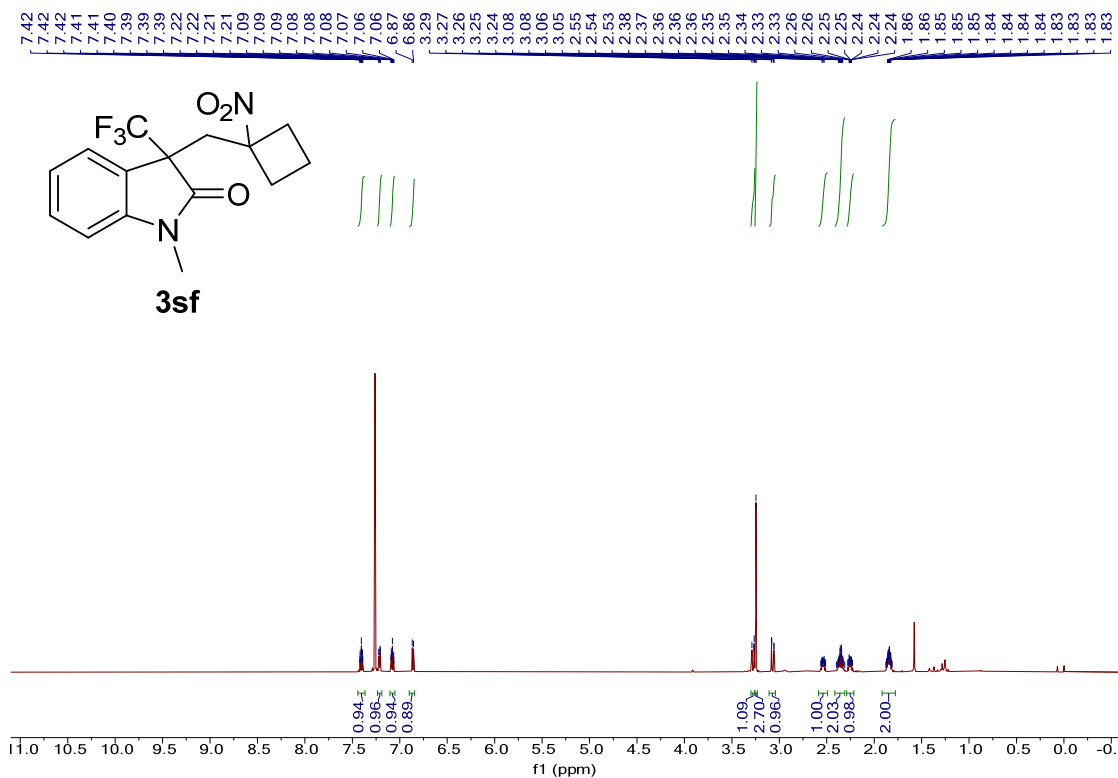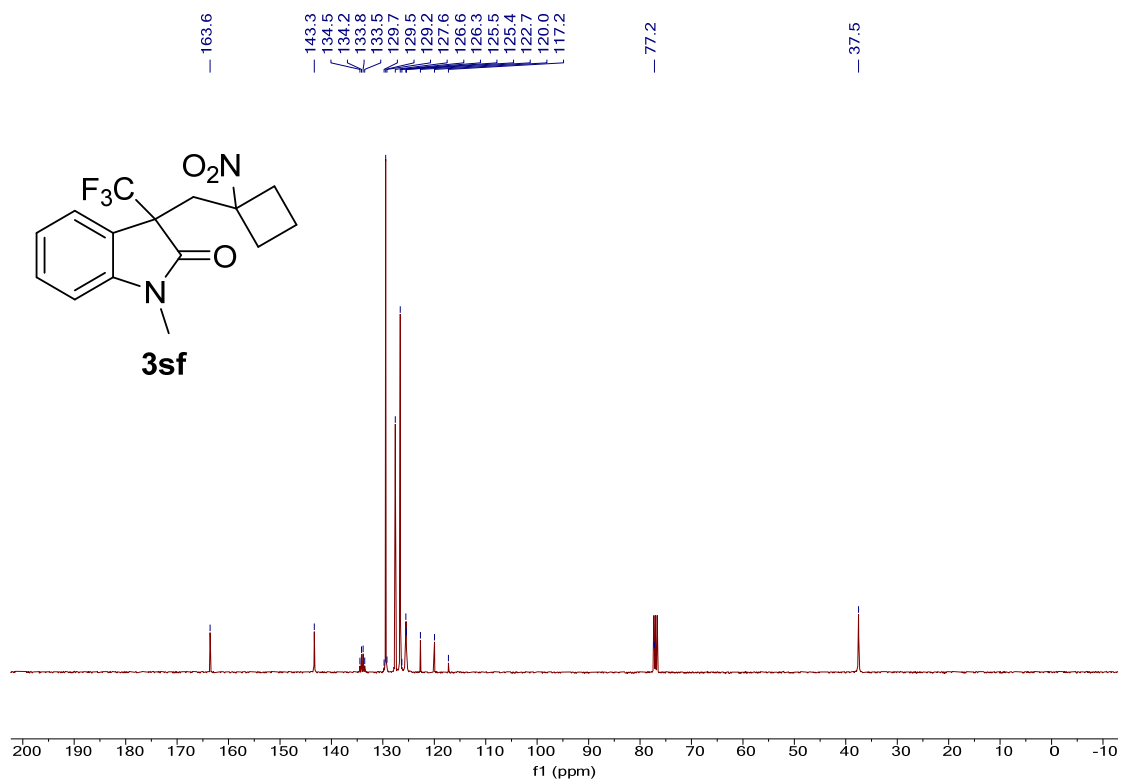

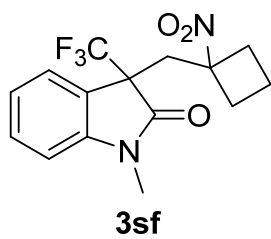

-73.76

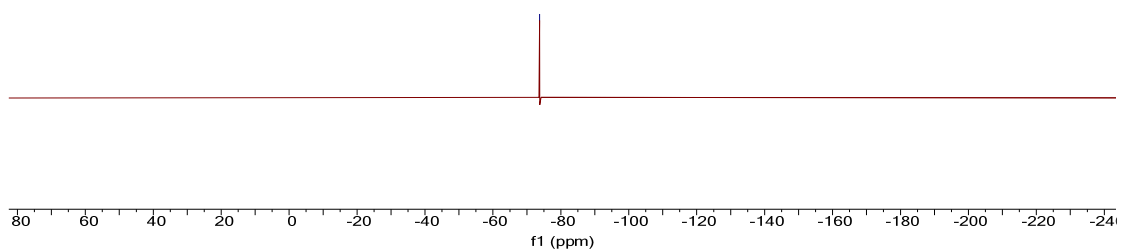

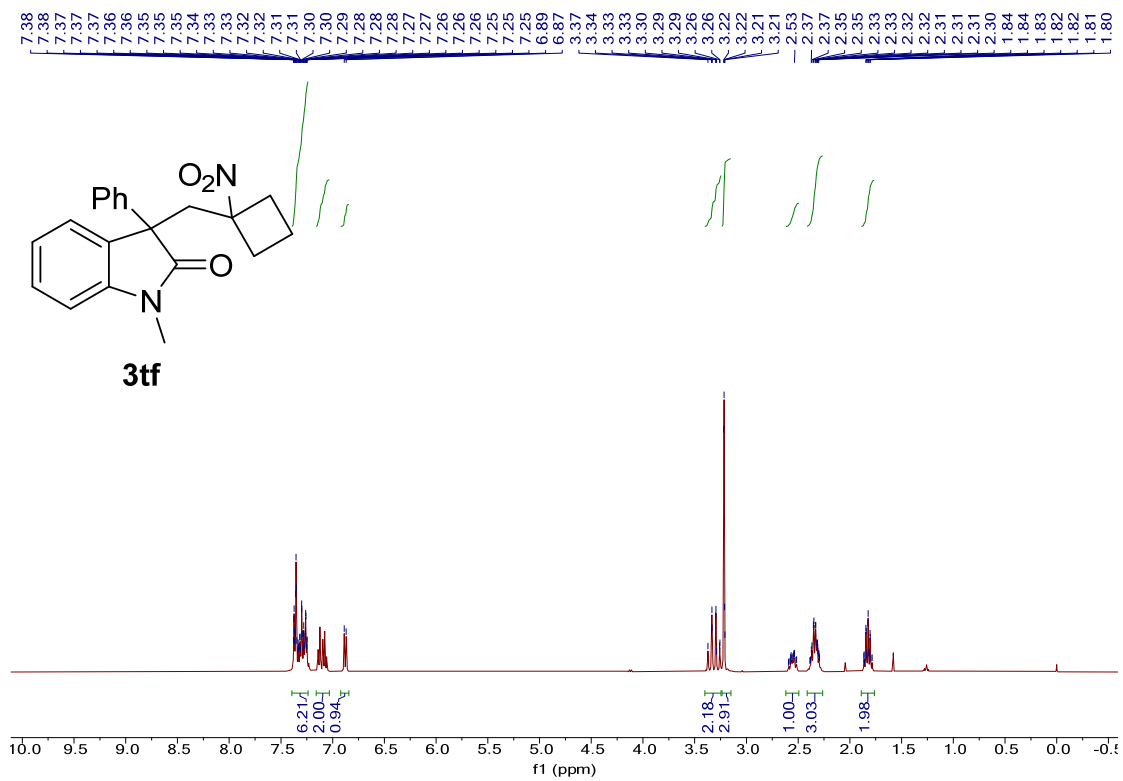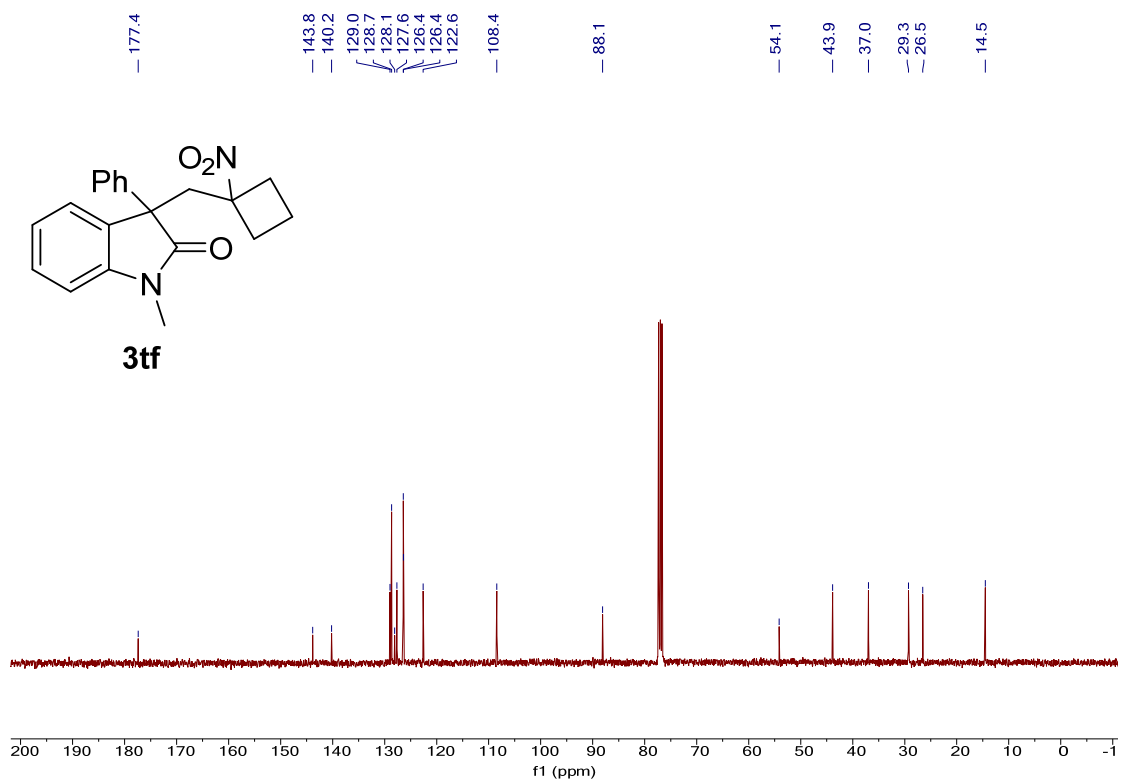

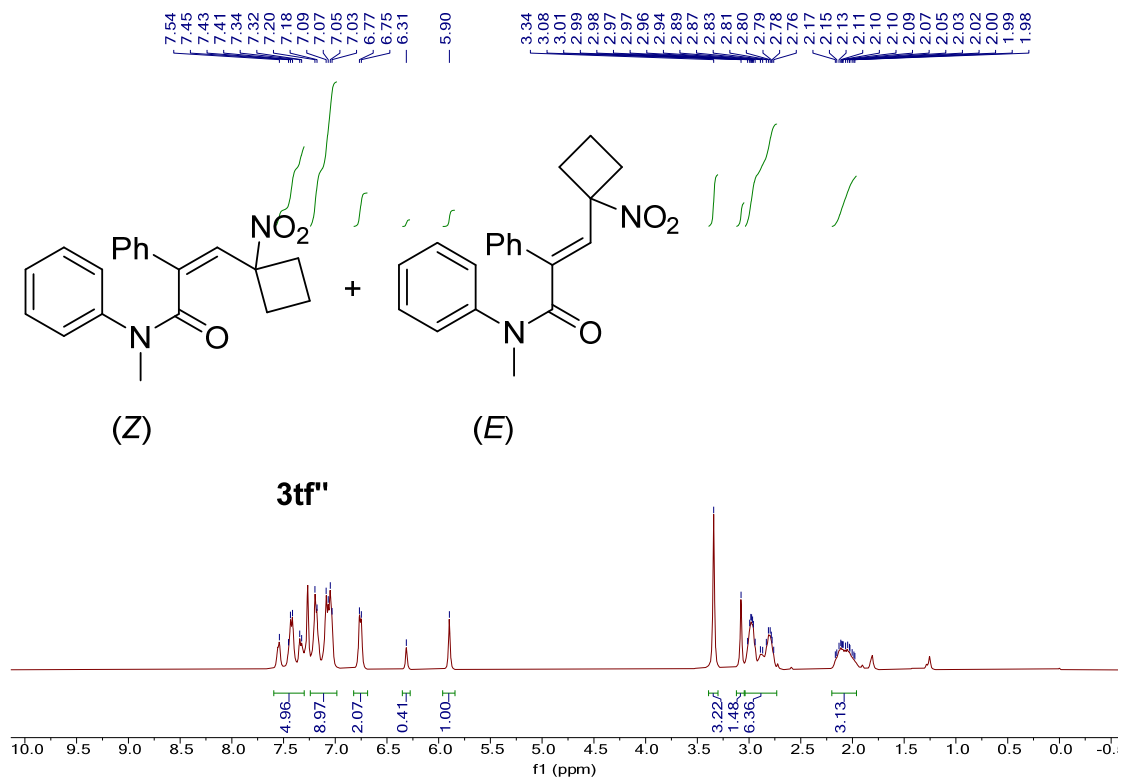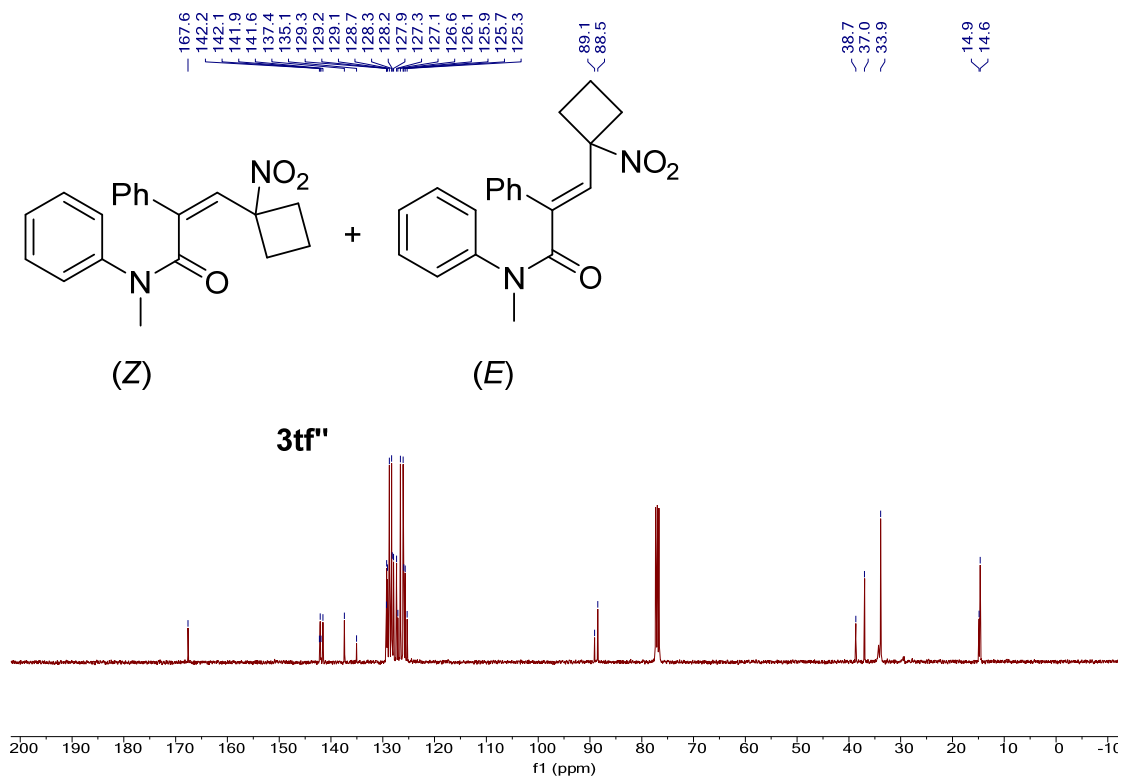

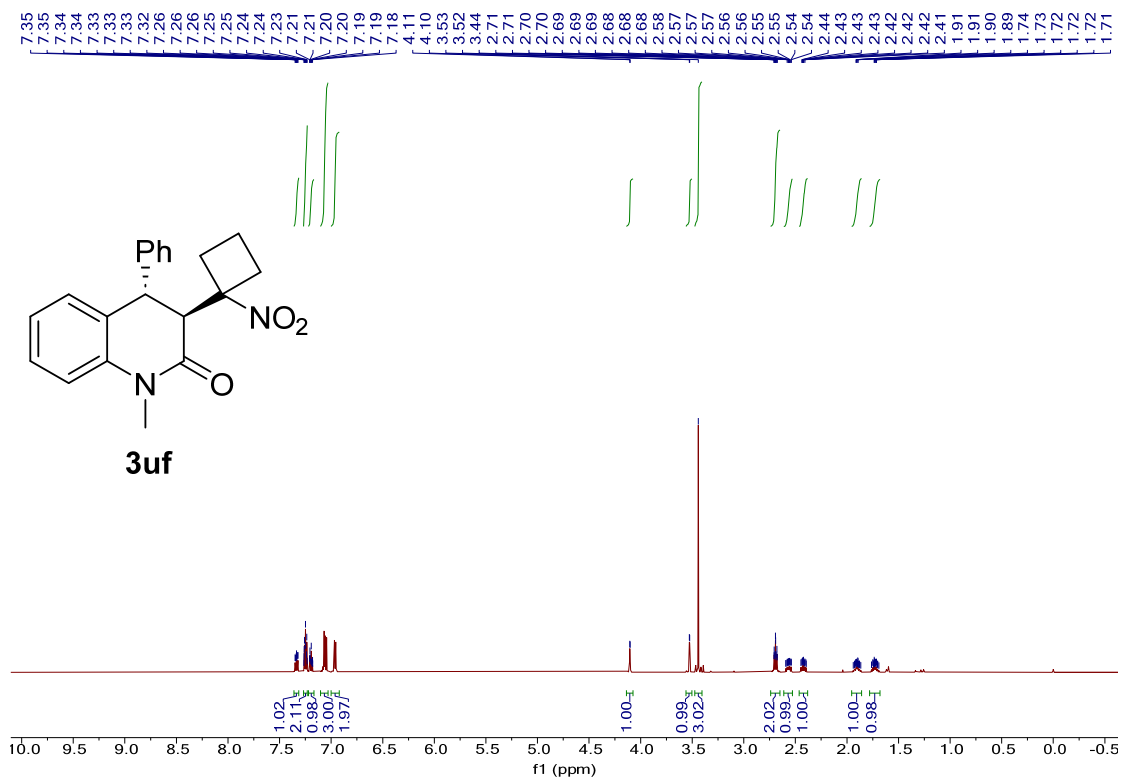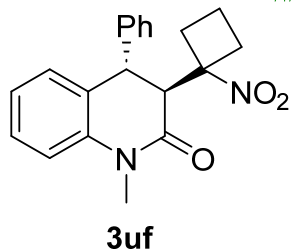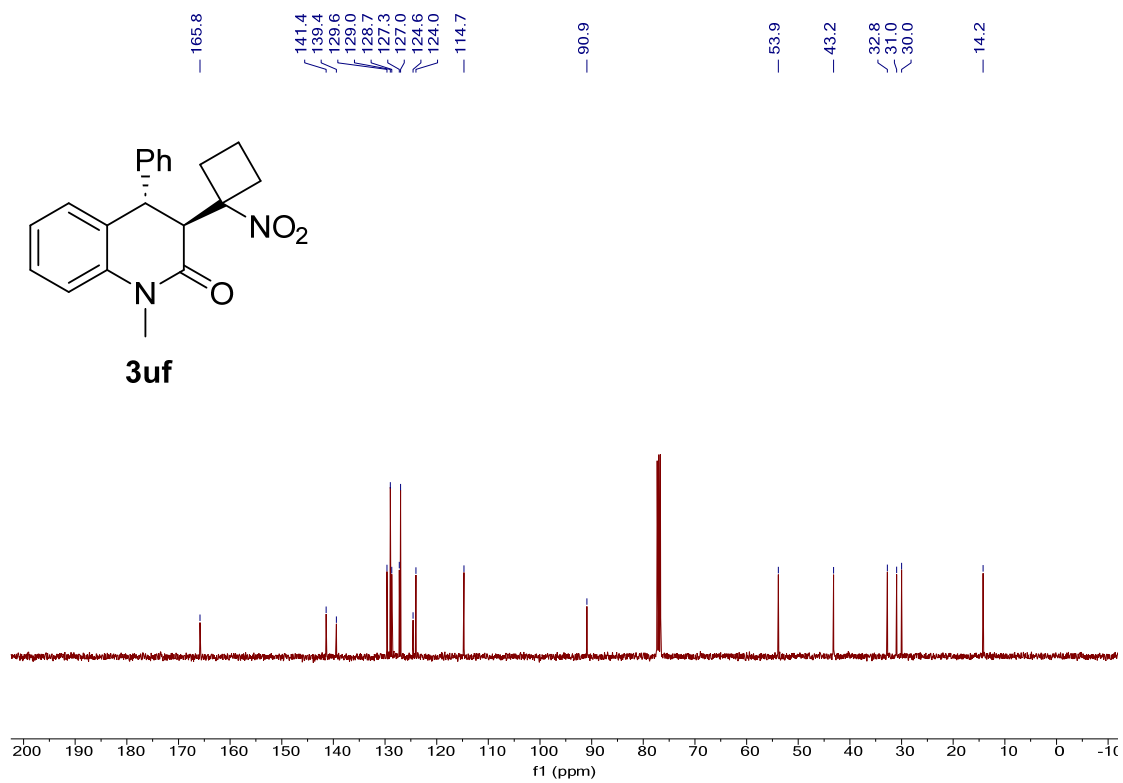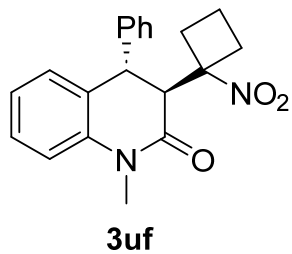

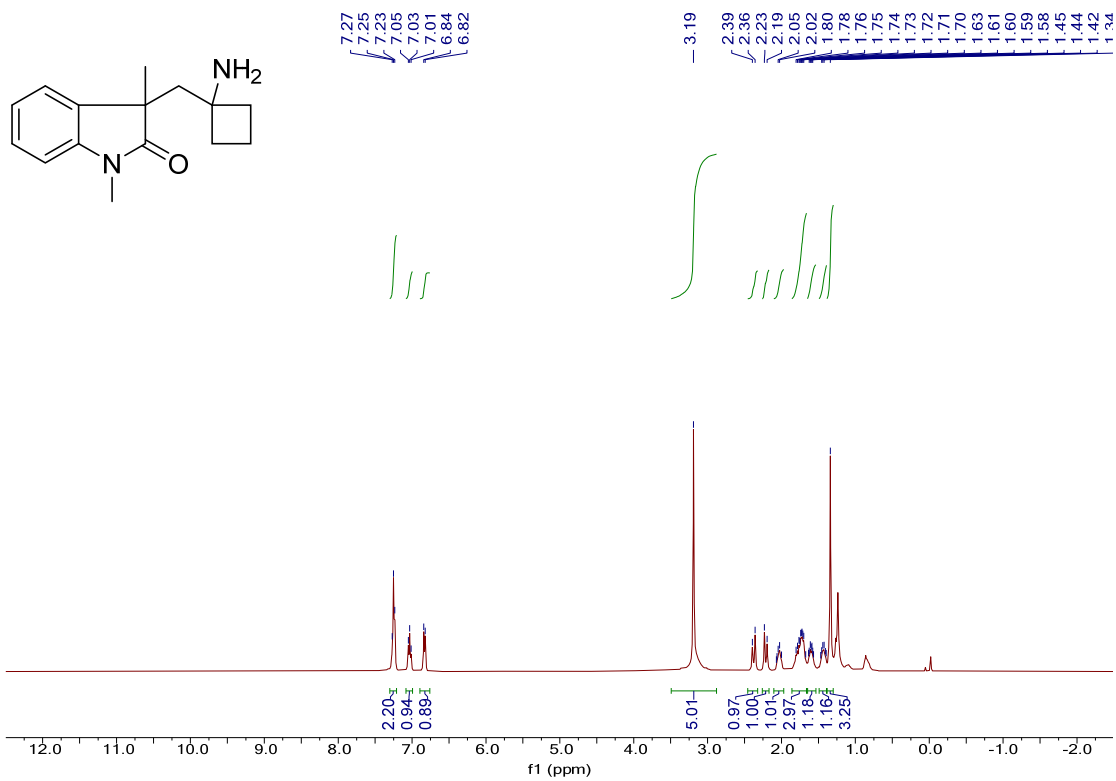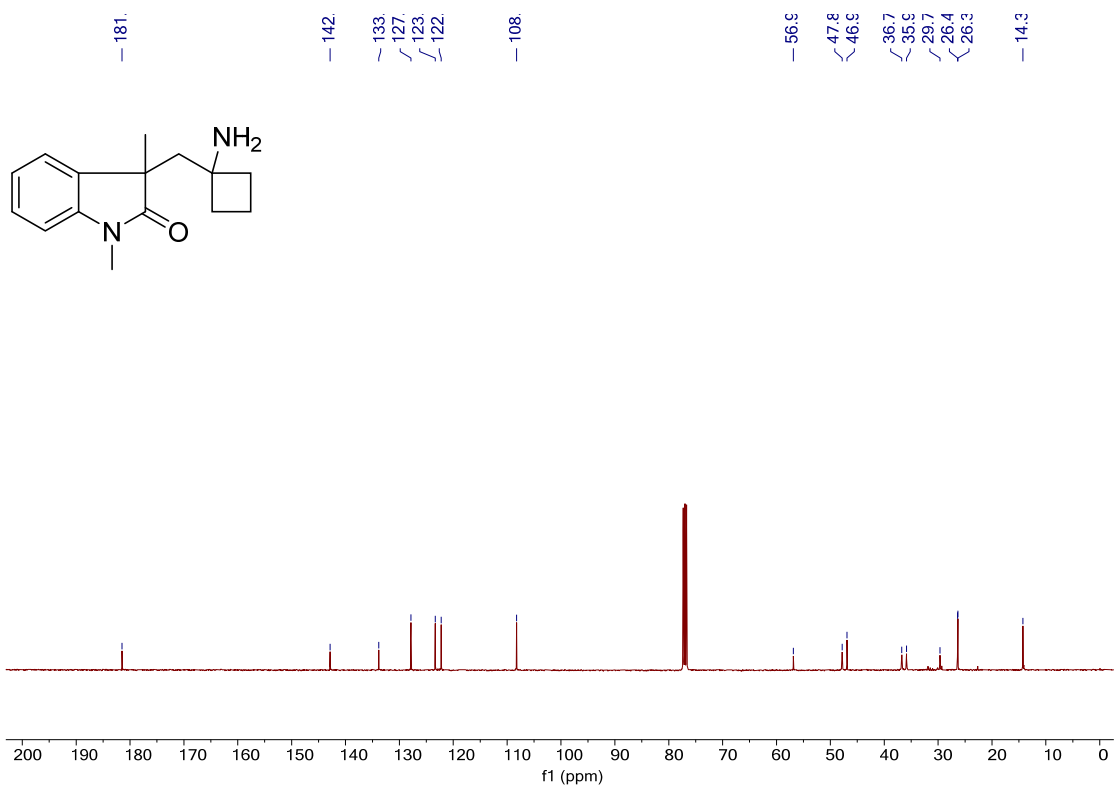

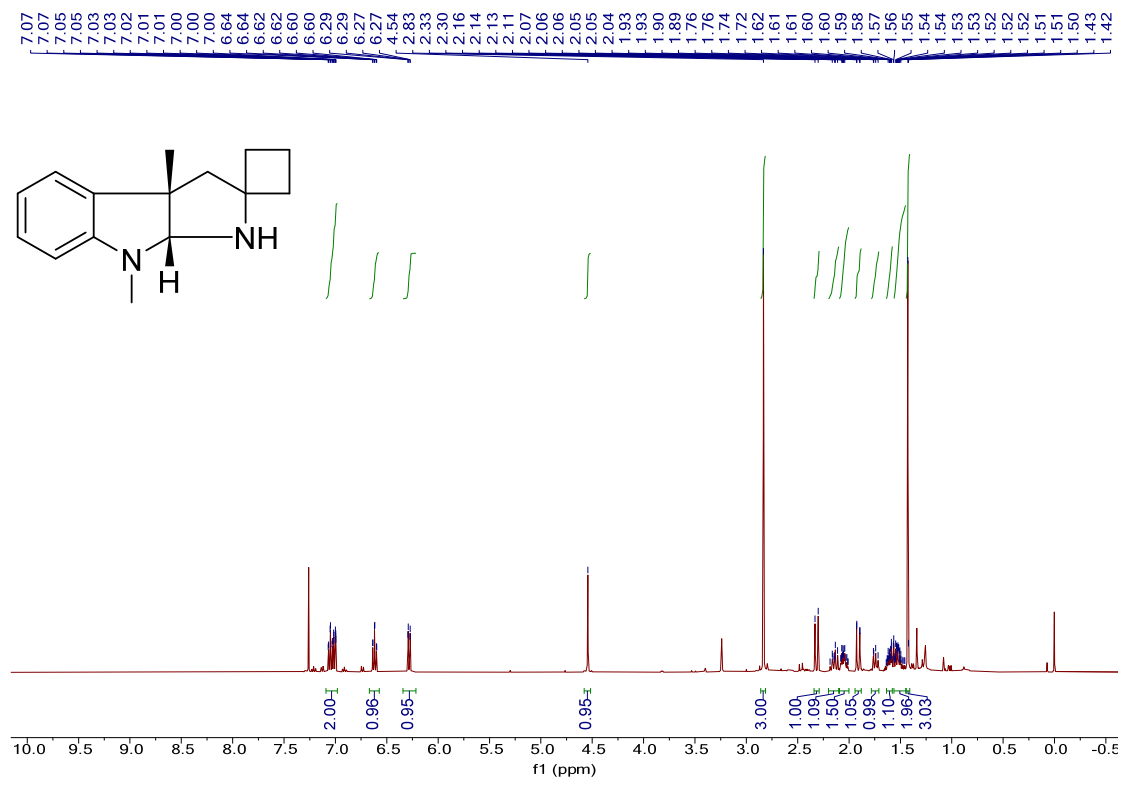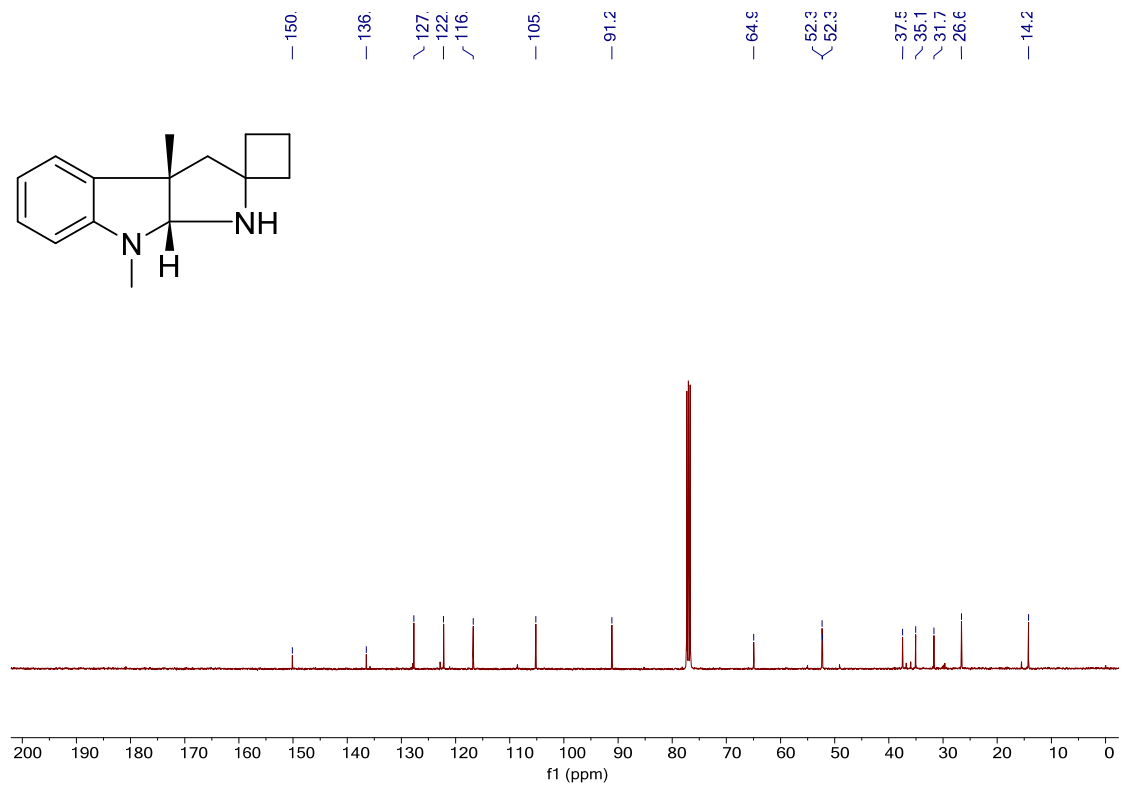





## 11. References

- 1 M. Zhang, X. Ding, A. Lu, J. Kang, Y. Gao, Z. Wang, H. Li and Q. Wang, Generation and precise control of sulfonyl radicals: visible-light-activated redox-neutral formation of sulfonates and sulfonamides, *Org. Chem. Front.*, 2021, **8**, 961–967.
- 2 Y. J. Jang, E. M. Larin and M. Lautens, Rhodium-Catalyzed Enantioselective Reductive Arylation: Convenient Access to 3,3-Disubstituted Oxindoles, *Angew. Chem. Int. Ed.*, 2017, **56**, 11927–11930.
- 3 V. R. Nascimento, M. L. S. Suenaga and L. H. Andrade, An efficient approach for the synthesis of new ( $\pm$ )-coixspirolactams, *Org. Biomol. Chem.*, 2020, **18**, 5458–5465.
- 4 L. Rocard, A. Berezin, F. De Leo and D. Bonifazi, Templated Chromophore Assembly by Dynamic Covalent Bonds, *Angew. Chem. Int. Ed.*, 2015, **54**, 15739–15743.
- 5 W. Ai, Y. Liu, Q. Wang, Z. Lu and Q. Liu, Cu-Catalyzed Redox-Neutral Ring Cleavage of Cycloketone O-Acyl Oximes: Chemodivergent Access to Distal Oxygenated Nitriles, *Org. Lett.*, 2018, **20**, 409–412.
- 6 H. Zhang, Z. Wei, A. H. Zhang and S. Yu, Access to Cyanoimines Enabled by Dual Photoredox/Copper-Catalyzed Cyanation of O-Acyl Oximes, *Org. Lett.*, 2020, **22**, 7315–7320.
- 7 G. Liu, X. Liu, Z. Cai, G. Jiao, G. Xu and W. Tang, Design of Phosphorus Ligands with Deep Chiral Pockets: Practical Synthesis of Chiral  $\beta$ -Arylamines by Asymmetric Hydrogenation, *Angew. Chem. Int. Ed.*, 2013, **52**, 4235–4238.
- 8 P. Y. Ushakov, E. A. Khatuntseva, Y. V. Nelyubina, A. A. Tabolin, S. L. Ioffe and A. Y. Sukhorukov, Synthesis of Isoxazolines from Nitroalkanes via a [4+1]-Annulation Strategy, *Adv. Synth. Catal.*, 2019, **361**, 5322–5327.
- 9 D. Wachtendorf, M. Schmidtman and J. Christoffers, Improved and Flexible Synthetic Access to the Spiroindole Backbone of Cebranopadol, *Org. Lett.*, 2020, **22**, 6420–6423.
- 10 N. Kornblum and P. A. Wade, Mild, nonacidic, method for converting secondary nitro compounds into ketones, *J. Org. Chem.*, 1973, **38**, 1418–1420.
- 11 H. Cao, S. Ma, Y. Feng, Y. Guo and P. Jiao, Synthesis of  $\beta$ -nitro ketones from geminal bromonitroalkanes and silyl enol ethers by visible light photoredox catalysis, *Chem. Commun.*, 2022, **58**, 1780–1783.
- 12 J. Li, M. J. Lear, Y. Kawamoto, S. Umemiya, A. R. Wong, E. Kwon, I. Sato and Y. Hayashi, Oxidative Amidation of Nitroalkanes with Amine Nucleophiles using Molecular Oxygen and Iodine, *Angew. Chem. Int. Ed.*, 2015, **54**, 12986–12990.
- 13 X. Li, P. D. Livant and J. Chen, An Alkene-Forming Cascade Reaction En Route to 2,2'-Bi(glycerol), *Synlett Letter*, 2018, **29**, 1769–1772.
- 14 G. E. Hawkes, K. Herwig and J. D. Roberts, Nuclear magnetic resonance spectroscopy. Use of carbon-13 spectra to establish configurations of oximes, *J. Org. Chem.*, 1974, **39**, 1017–1028.
- 15 K. Suzuki, T. Watanabe and S. Murahashi, Oxidation of Primary Amines to Oximes with Molecular Oxygen using 1,1-Diphenyl-2-picrylhydrazyl and  $\text{WO}_3/\text{Al}_2\text{O}_3$  as Catalysts, *J. Org. Chem.*, 2013, **78**, 2301–2310.
- 16 J. K. Augustine, R. Kumar, A. Bombrun and A. B. Mandal, An efficient catalytic method for the Beckmann rearrangement of ketoximes to amides and aldoximes to nitriles mediated by propylphosphonic anhydride (T3P®), *Tetrahedron Lett.*, 2011, **52**, 1074–1077.
- 17 A. S. Erickson and N. Kornblum, Monohalogenation of primary nitroparaffins, *J. Org. Chem.*, 1977, **42**, 3764–3765.
- 18 A. I. Ilovaisky, V. M. Merkulova, Y. N. Ogibin and G. I. Nikishin, Electrooxidative coupling of salts of nitro compounds with halide, nitrite, cyanide, and phenylsulfinate anions, *Russ. Chem. Bull.*, 2005, **54**,

1585–1592.

19 M. Tajbakhsh, A. Khazaei, M. S. Mahalli and R. G. Vaghi, *N,N*- Dibromobenzenesulfonamide: A Useful Regenerable Reagent for Bromination of Various Carbanionic Substrates, *Phosphorus, Sulfur, and Silicon and the Related Elements*, 2004, **179**, 1159–1163.

20 B. Shen, D. M. Makley and J. N. Johnston, Umpolung reactivity in amide and peptide synthesis, *Nature*, 2010, **465**, 1027–1032.

21 R. A. Kunetsky, A. D. Dilman, S. L. Ioffe, M. I. Struchkova, Y. A. Strelenko and V. A. Tartakovsky, New Approach for the Synthesis of Isoxazoline-N-oxides, *Org. Lett.*, 2003, **5**, 4907–4909.

22 A. Zaks, A. V. Yabannavar, D. R. Dodds, C. A. Evans, P. R. Das and R. Malchow, A Novel Application of Chloroperoxidase: Preparation of gem-Halonitro Compounds, *J. Org. Chem.*, 1996, **61**, 8692–8695.

23 K. S. Kanyiva, S. Makino and T. Shibata, Silver-Catalyzed Efficient Synthesis of Oxindoles and Pyrroloindolines via  $\alpha$ -Aminoalkylation of *N*-Arylacrylamides with Amino Acid Derivatives, *Chemistry - An Asian Journal*, 2018, **13**, 496–499.

24 W. Jung, B. K. Mai, B. J. Spinello, Z. J. Dubey, S. W. Kim, C. E. Stivala, J. R. Zbieg, P. Liu and M. J. Krische, Enantioselective Iridium-Catalyzed Allylation of Nitroalkanes: Entry to  $\beta$ -Stereogenic  $\alpha$ -Quaternary Primary Amines, *J. Am. Chem. Soc.*, 2021, **143**, 9343–9349.

25 Z. Zhang, T. Chen and F. Zhang, Copper-Assisted Direct Nitration of Cyclic Ketones with Ceric Ammonium Nitrate for the Synthesis of Tertiary  $\alpha$ -Nitro- $\alpha$ -substituted Scaffolds, *Org. Lett.*, 2017, **19**, 1124–1127.
